# Supplementary material for: Transcriptomic and Proteomic Profiling Reveal the Key Role of AcMYB16 in the Response of Pseudomonas syringae pv. actinidiae in Kiwifruit
Source: Front Plant Sci. 2021 Nov 11;12:756330. doi: 10.3389/fpls.2021.756330 (PMC8632638; doi:10.3389/fpls.2021.756330)
Supplement: Supplementary file 3 [file Table_2.XLS]

Table S2 Differentially expressed genes (DEGs, |log2 fold change| > 1, P < 0.05) were identified in A. c. var. deliciosa cultivar ��Jinkui�� after inoculation with Psa.
GeneID	length	mock Readnum	Psa Readnum	log2Ratio(Psa/mock)	Up-Down-Regulation(Psa/mock)	p-value	q-value(Storey et al. 2003)
Acc29799	3262	856.33	0	-9.722606476	Down	1.21E-110	7.07E-110
Acc03503	1341	484	0	-8.899446655	Down	2.13E-70	8.31E-70
Acc25303	1768	465.22	0	-8.842352728	Down	3.40E-68	1.29E-67
Acc22713	4155	360.53	0	-8.47455892	Down	1.71E-55	5.46E-55
Acc09737	1430	353.71	0	-8.447006615	Down	1.23E-54	3.85E-54
Acc05639	1636	347.94	0	-8.423278152	Down	6.53E-54	2.03E-53
Acc28015	1060	3235	5	-8.31820532	Down	0	0
Acc17991	1141	294.02	0	-8.180353902	Down	5.60E-47	1.54E-46
Acc23038	2394	263.38	0	-8.021585405	Down	6.52E-43	1.66E-42
Acc19042	936	249	0	-7.94058535	Down	5.73E-41	1.41E-40
Acc04990	1053	195.73	0	-7.593304506	Down	1.54E-33	3.22E-33
Acc26077	2148	195.38	0	-7.590722402	Down	1.72E-33	3.61E-33
Acc10060	3239	193.41	0	-7.576101997	Down	3.30E-33	6.87E-33
Acc19488	4087	191.74	0	-7.563590945	Down	5.74E-33	1.19E-32
Acc00607	1684	183.71	0	-7.501869767	Down	8.29E-32	1.67E-31
Acc25190	1637	179.26	0	-7.46649321	Down	3.68E-31	7.26E-31
Acc17563	2687	171.59	0	-7.403405085	Down	4.89E-30	9.36E-30
Acc24956	2291	156.26	0	-7.268388127	Down	9.22E-28	1.67E-27
Acc31727	3154	153.27	0	-7.240514949	Down	2.59E-27	4.62E-27
Acc14330	3140	168.57	0	-7.18875359	Down	5.64E-30	1.08E-29
Acc07485	2259	141.45	0	-7.124731785	Down	1.61E-25	2.71E-25
Acc28613	3237	127.2	0	-6.971538278	Down	2.55E-23	4.00E-23
Acc24839	2180	120.85	0	-6.897657081	Down	2.52E-22	3.83E-22
Acc23271	2198	118.56	0	-6.870056961	Down	5.78E-22	8.69E-22
Acc03307	573	118.18	0	-6.865425512	Down	6.64E-22	9.96E-22
Acc13194	6303	117.07	0	-6.85181103	Down	9.95E-22	1.48E-21
Acc21105	1642	117	0	-6.850948138	Down	1.02E-21	1.52E-21
Acc08633	1966	116.27	0	-6.841918508	Down	1.33E-21	1.98E-21
Acc23643	1438	110.7	0	-6.77109483	Down	1.03E-20	1.48E-20
Acc10759	1146	109.6	0	-6.756687406	Down	1.54E-20	2.20E-20
Acc15722	785	107.59	0	-6.7299836	Down	3.24E-20	4.56E-20
Acc05573	542	215	1	-6.728776268	Down	9.33E-39	2.20E-38
Acc19878	3581	321.88	1.51	-6.716413996	Down	3.53E-57	1.15E-56
Acc19236	3378	104.94	0	-6.694004303	Down	8.67E-20	1.20E-19
Acc01074	2619	101.46	0	-6.645350673	Down	3.18E-19	4.32E-19
Acc04512	2555	100.07	0	-6.625449141	Down	5.35E-19	7.18E-19
Acc07027	683	97	0	-6.58049626	Down	1.70E-18	2.24E-18
Acc01564	5975	94.53	0	-6.543283768	Down	4.32E-18	5.61E-18
Acc15723	864	92.59	0	-6.513367899	Down	9.02E-18	1.16E-17
Acc00366	2151	91.95	0	-6.503361088	Down	1.15E-17	1.47E-17
Acc04808	2401	91.86	0	-6.501948296	Down	1.19E-17	1.52E-17
Acc33232	2647	91.23	0	-6.49201983	Down	1.51E-17	1.92E-17
Acc04746	2295	86.04	0	-6.407519038	Down	1.11E-16	1.35E-16
Acc16406	1799	516	3	-6.406848173	Down	1.08E-91	5.39E-91
Acc30809	789	86	0	-6.406848173	Down	1.12E-16	1.37E-16
Acc04009	1807	83.42	0	-6.362904825	Down	3.04E-16	3.64E-16
Acc27609	1208	81.61	0	-6.331257455	Down	6.14E-16	7.22E-16
Acc08521	1094	80	0	-6.302511513	Down	1.15E-15	1.34E-15
Acc27634	1385	76.5	0	-6.237971261	Down	4.52E-15	5.13E-15
Acc24687	2005	76.25	0	-6.23324885	Down	4.99E-15	5.65E-15
Acc14962	1793	75.3	0	-6.215161378	Down	7.25E-15	8.15E-15
Acc32922	3547	75.14	0	-6.212092629	Down	7.72E-15	8.67E-15
Acc18068	5145	74.71	0	-6.203812875	Down	9.15E-15	1.02E-14
Acc24406	1145	74	0	-6.190036784	Down	1.21E-14	1.35E-14
Acc12202	749	70.94	0	-6.129110843	Down	4.07E-14	4.41E-14
Acc11323	1586	69	0	-6.089107875	Down	8.81E-14	9.39E-14
Acc02702	989	681	5	-6.070166311	Down	1.99E-121	1.25E-120
Acc11890	867	46.16	0	-6.065548085	Down	1.05E-09	8.87E-10
Acc02812	2566	67.29	0	-6.052903634	Down	1.75E-13	1.83E-13
Acc06824	692	67	0	-6.046672608	Down	1.96E-13	2.05E-13
Acc16138	526	179.24	1.35	-6.033372832	Down	2.62E-33	5.46E-33
Acc05450	890	65.45	0	-6.012904705	Down	3.66E-13	3.77E-13
Acc14094	1339	65.3	0	-6.009594505	Down	3.89E-13	4.00E-13
Acc03199	1176	64.65	0	-5.995161883	Down	5.05E-13	5.17E-13
Acc07559	2808	64.17	0	-5.984410496	Down	6.13E-13	6.24E-13
Acc05557	1246	63.94	0	-5.979230257	Down	6.73E-13	6.83E-13
Acc02801	1642	63.73	0	-5.974484174	Down	7.32E-13	7.42E-13
Acc04386	471	1146	9	-5.973049745	Down	3.09E-203	3.16E-202
Acc10612	2837	62.01	0	-5.935012402	Down	1.47E-12	1.47E-12
Acc08442	1860	61.18	0	-5.91557162	Down	2.06E-12	2.04E-12
Acc01436	919	122	1	-5.911320756	Down	3.14E-23	4.92E-23
Acc15574	942	61	0	-5.911320756	Down	2.22E-12	2.19E-12
Acc13611	1113	60	0	-5.887474014	Down	3.33E-12	3.26E-12
Acc01811	2530	57.48	0	-5.825571575	Down	9.34E-12	8.90E-12
Acc26607	673	57	0	-5.813473432	Down	1.14E-11	1.08E-11
Acc13029	2452	56.02	0	-5.788453496	Down	1.70E-11	1.60E-11
Acc15023	399	56	0	-5.78793834	Down	1.72E-11	1.61E-11
Acc04547	5077	56	0	-5.78793834	Down	1.72E-11	1.61E-11
Acc24967	3025	55.99	0	-5.787680693	Down	1.72E-11	1.62E-11
Acc15720	1132	332.75	3	-5.773915773	Down	1.88E-60	6.42E-60
Acc03266	2673	55.24	0	-5.768224832	Down	2.35E-11	2.19E-11
Acc26225	510	54	0	-5.73547092	Down	3.92E-11	3.61E-11
Acc06316	1768	52	0	-5.681023136	Down	9.01E-11	8.11E-11
Acc25435	1055	50.67	0	-5.643643342	Down	1.57E-10	1.39E-10
Acc10499	1814	50.14	0	-5.628473509	Down	1.96E-10	1.73E-10
Acc26990	1313	50.06	0	-5.626169804	Down	2.03E-10	1.79E-10
Acc29841	2162	49.98	0	-5.623862414	Down	2.09E-10	1.85E-10
Acc20941	2117	49.75	0	-5.617208039	Down	2.31E-10	2.03E-10
Acc22316	1754	49.37	0	-5.606146158	Down	2.70E-10	2.37E-10
Acc06634	4016	48	0	-5.565545919	Down	4.81E-10	4.14E-10
Acc13330	1528	47.7	0	-5.556500779	Down	5.46E-10	4.68E-10
Acc15384	3099	46.65	0	-5.524388594	Down	8.50E-10	7.20E-10
Acc33775	1006	46	0	-5.504145374	Down	1.12E-09	9.40E-10
Acc24396	1476	45.77	0	-5.496913805	Down	1.23E-09	1.03E-09
Acc07217	1154	89	1	-5.456316849	Down	2.47E-17	3.10E-17
Acc04804	1236	44.39	0	-5.452746222	Down	2.22E-09	1.83E-09
Acc31339	1437	135.95	1.56	-5.42596973	Down	1.27E-25	2.14E-25
Acc11788	1776	43.14	0	-5.411537689	Down	3.78E-09	3.06E-09
Acc14214	1082	43	0	-5.406848173	Down	4.01E-09	3.25E-09
Acc18184	603	42.62	0	-5.394042106	Down	4.72E-09	3.80E-09
Acc28987	2128	593.7	7	-5.386818799	Down	6.68E-106	3.76E-105
Acc14695	843	42.03	0	-5.373930969	Down	6.08E-09	4.84E-09
Acc21194	1183	41.98	0	-5.37221368	Down	6.21E-09	4.94E-09
Acc16608	1057	2818.17	33.81	-5.361748233	Down	0	0
Acc13742	2082	83.19	1	-5.35892163	Down	2.87E-16	3.43E-16
Acc08110	1703	55.4	0	-5.350164488	Down	2.50E-11	2.33E-11
Acc08076	2150	41	0	-5.338135423	Down	9.46E-09	7.43E-09
Acc16591	788	734.82	9.01	-5.330303395	Down	2.06E-130	1.39E-129
Acc10344	789	40.35	0	-5.315080186	Down	1.25E-08	9.76E-09
Acc15719	1102	40.25	0	-5.311500296	Down	1.31E-08	1.02E-08
Acc30127	1341	40	0	-5.302511513	Down	1.46E-08	1.13E-08
Acc14908	5572	39.86	0	-5.297453223	Down	1.55E-08	1.20E-08
Acc15209	1933	39.8	0	-5.295279944	Down	1.59E-08	1.23E-08
Acc18745	1696	38.83	0	-5.25968322	Down	2.41E-08	1.84E-08
Acc30069	920	38.79	0	-5.258196289	Down	2.46E-08	1.87E-08
Acc04229	2295	76	1	-5.228510931	Down	6.12E-15	6.91E-15
Acc21675	644	7729.67	102.7	-5.214482154	Down	0	0
Acc23403	1949	37.61	0	-5.213627819	Down	4.10E-08	3.07E-08
Acc22162	1291	75	1	-5.209402108	Down	9.40E-15	1.05E-14
Acc04624	1173	1193	16	-5.200961746	Down	1.47E-209	1.55E-208
Acc23723	1565	37	0	-5.190036784	Down	5.35E-08	3.97E-08
Acc10503	1129	36.85	0	-5.184176132	Down	5.71E-08	4.23E-08
Acc25967	971	36.84	0	-5.183784574	Down	5.73E-08	4.25E-08
Acc20036	2350	250.14	3.41	-5.177403647	Down	2.17E-45	5.79E-45
Acc11662	1134	3559	49	-5.163129791	Down	0	0
Acc24867	2304	723	10	-5.15650716	Down	1.39E-127	9.16E-127
Acc31257	2714	1155	16	-5.154260554	Down	1.40E-202	1.43E-201
Acc32353	2798	36.01	0	-5.150909112	Down	8.23E-08	6.03E-08
Acc03329	1097	36	0	-5.150508419	Down	8.27E-08	6.06E-08
Acc26043	825	36	0	-5.150508419	Down	8.27E-08	6.06E-08
Acc27369	1640	35.7	0	-5.138435587	Down	9.43E-08	6.87E-08
Acc05395	1840	35.67	0	-5.137222729	Down	9.55E-08	6.96E-08
Acc32093	1043	71.26	1	-5.135603996	Down	4.69E-14	5.06E-14
Acc15721	1032	70.63	1	-5.122792609	Down	6.15E-14	6.60E-14
Acc29907	1325	35.25	0	-5.12013477	Down	1.15E-07	8.30E-08
Acc24801	1294	35.2	0	-5.118086942	Down	1.17E-07	8.48E-08
Acc07191	3207	34.9	0	-5.105738549	Down	1.34E-07	9.62E-08
Acc09257	1182	207.63	3	-5.093492018	Down	7.65E-38	1.77E-37
Acc19224	1509	33.98	0	-5.067197365	Down	2.01E-07	1.42E-07
Acc11546	652	67	1	-5.046672608	Down	2.95E-13	3.06E-13
Acc33757	1511	33.41	0	-5.042791496	Down	2.58E-07	1.81E-07
Acc27246	1046	66	1	-5.024977537	Down	4.56E-13	4.67E-13
Acc33599	1574	33	0	-5.024977537	Down	3.09E-07	2.15E-07
Acc32854	1395	657	10	-5.018404883	Down	2.20E-115	1.32E-114
Acc09170	973	65	1	-5.002951231	Down	7.04E-13	7.14E-13
Acc16584	2215	32.25	0	-4.991810673	Down	4.30E-07	2.96E-07
Acc15506	897	10696	166	-4.990327737	Down	0	0
Acc24502	1031	32.09	0	-4.984635303	Down	4.62E-07	3.17E-07
Acc06317	1753	32	0	-4.980583418	Down	4.81E-07	3.29E-07
Acc11895	1464	32	0	-4.980583418	Down	4.81E-07	3.29E-07
Acc23666	1077	32	0	-4.980583418	Down	4.81E-07	3.29E-07
Acc09670	2306	63.17	1	-4.961751085	Down	1.56E-12	1.56E-12
Acc00879	1624	31	0	-4.934779728	Down	7.49E-07	5.06E-07
Acc11835	606	31	0	-4.934779728	Down	7.49E-07	5.06E-07
Acc23537	2531	31	0	-4.934779728	Down	7.49E-07	5.06E-07
Acc25889	927	245	4	-4.917221357	Down	6.05E-44	1.58E-43
Acc23105	1643	30.55	0	-4.913683893	Down	9.15E-07	6.12E-07
Acc29152	7639	30.53	0	-4.912739102	Down	9.24E-07	6.17E-07
Acc17682	4192	30.38	0	-4.905633383	Down	9.87E-07	6.57E-07
Acc28592	3673	30.33	0	-4.903257011	Down	1.01E-06	6.71E-07
Acc16290	2931	30	0	-4.887474014	Down	1.17E-06	7.72E-07
Acc15317	1743	29.91	0	-4.883139423	Down	1.22E-06	8.03E-07
Acc00468	1139	29.72	0	-4.873945629	Down	1.33E-06	8.72E-07
Acc22470	3193	29.33	0	-4.854888584	Down	1.58E-06	1.03E-06
Acc04007	719	29.28	0	-4.852427067	Down	1.61E-06	1.05E-06
Acc13515	899	29	0	-4.838564413	Down	1.83E-06	1.19E-06
Acc23218	846	29	0	-4.838564413	Down	1.83E-06	1.19E-06
Acc05574	680	2143	37	-4.836546187	Down	0	0
Acc04474	1683	28.69	0	-4.823059481	Down	2.10E-06	1.36E-06
Acc06953	941	397	7	-4.806223693	Down	1.34E-69	5.16E-69
Acc09370	1227	28.33	0	-4.804842115	Down	2.47E-06	1.59E-06
Acc07811	1237	28.08	0	-4.792054449	Down	2.76E-06	1.76E-06
Acc18967	1097	2369	43	-4.764381147	Down	0	0
Acc14649	1464	110	2	-4.761943132	Down	1.90E-20	2.70E-20
Acc14431	2809	2463.92	45	-4.755470021	Down	0	0
Acc17506	1329	871	16	-4.747112327	Down	9.14E-150	6.91E-149
Acc00248	1346	27.01	0	-4.736005153	Down	4.47E-06	2.80E-06
Acc10913	1303	1080	20	-4.73547092	Down	4.74E-185	4.41E-184
Acc29635	1117	27	0	-4.73547092	Down	4.49E-06	2.81E-06
Acc21150	1843	27	0	-4.73547092	Down	4.49E-06	2.81E-06
Acc02726	1120	26.84	0	-4.726896184	Down	4.83E-06	3.01E-06
Acc04678	1764	53	1	-4.708503873	Down	1.36E-10	1.21E-10
Acc24714	2203	26.44	0	-4.70523369	Down	5.79E-06	3.58E-06
Acc24907	3637	26.4	0	-4.703049442	Down	5.89E-06	3.64E-06
Acc17191	1030	26.28	0	-4.696476789	Down	6.22E-06	3.84E-06
Acc13958	1084	10124.67	194.4	-4.683286275	Down	0	0
Acc02140	930	26	0	-4.681023136	Down	7.06E-06	4.34E-06
Acc21981	525	26	0	-4.681023136	Down	7.06E-06	4.34E-06
Acc30045	948	26	0	-4.681023136	Down	7.06E-06	4.34E-06
Acc03255	2311	25.91	0	-4.676020528	Down	7.36E-06	4.51E-06
Acc24282	3681	25.69	0	-4.663718403	Down	8.13E-06	4.96E-06
Acc28382	925	51	1	-4.65300876	Down	3.31E-10	2.87E-10
Acc14501	1898	25.48	0	-4.65187679	Down	8.94E-06	5.43E-06
Acc22053	1214	25.41	0	-4.647907888	Down	9.23E-06	5.60E-06
Acc29801	2754	25.29	0	-4.64107855	Down	9.75E-06	5.90E-06
Acc27063	2099	83.6	1.67	-4.626166352	Down	9.28E-16	1.08E-15
Acc08844	672	50	1	-4.624439608	Down	5.16E-10	4.43E-10
Acc17408	1667	25	0	-4.624439608	Down	1.11E-05	6.69E-06
Acc17379	1071	25	0	-4.624439608	Down	1.11E-05	6.69E-06
Acc08558	2385	25	0	-4.624439608	Down	1.11E-05	6.69E-06
Acc16388	1678	11719.04	235	-4.620633243	Down	0	0
Acc13985	1295	24.89	0	-4.618077743	Down	1.17E-05	7.01E-06
Acc19916	759	248	5	-4.612851633	Down	1.61E-43	4.16E-43
Acc04228	2405	49	1	-4.595293262	Down	8.05E-10	6.82E-10
Acc27422	1387	24.29	0	-4.582874003	Down	1.54E-05	9.11E-06
Acc28483	1651	146.21	3.01	-4.582718108	Down	2.76E-26	4.76E-26
Acc12320	1437	340	7	-4.582619432	Down	7.55E-59	2.53E-58
Acc30718	913	291	6	-4.58049626	Down	1.28E-50	3.77E-50
Acc29400	1544	24.16	0	-4.575131968	Down	1.63E-05	9.64E-06
Acc06893	1139	288	6	-4.565545919	Down	4.76E-50	1.38E-49
Acc25347	867	48	1	-4.565545919	Down	1.26E-09	1.05E-09
Acc01556	1434	24	0	-4.565545919	Down	1.75E-05	1.03E-05
Acc24440	570	24	0	-4.565545919	Down	1.75E-05	1.03E-05
Acc17582	2053	24	0	-4.565545919	Down	1.75E-05	1.03E-05
Acc11213	1263	24	0	-4.565545919	Down	1.75E-05	1.03E-05
Acc22000	687	24	0	-4.565545919	Down	1.75E-05	1.03E-05
Acc28431	1747	24	0	-4.565545919	Down	1.75E-05	1.03E-05
Acc22176	1500	23.84	0	-4.555895749	Down	1.89E-05	1.11E-05
Acc04508	1435	95	2	-4.550439026	Down	1.37E-17	1.74E-17
Acc24853	1015	23.48	0	-4.533943921	Down	2.22E-05	1.30E-05
Acc16734	2290	23.4	0	-4.529020043	Down	2.31E-05	1.34E-05
Acc26647	2189	276	6	-4.504145374	Down	9.05E-48	2.52E-47
Acc33225	1578	23	0	-4.504145374	Down	2.77E-05	1.60E-05
Acc11621	1715	22.99	0	-4.503517979	Down	2.78E-05	1.61E-05
Acc11448	2712	7250	158	-4.50056795	Down	0	0
Acc12988	1854	28404.57	621	-4.495969402	Down	0	0
Acc28799	1655	22.62	0	-4.480110442	Down	3.30E-05	1.89E-05
Acc08358	1431	100.89	2.25	-4.467297791	Down	1.90E-18	2.51E-18
Acc28178	1283	200.79	4.49	-4.463411583	Down	4.32E-35	9.38E-35
Acc07519	1686	186.68	4.18	-4.461504038	Down	9.74E-33	2.00E-32
Acc23699	1986	22.04	0	-4.442635737	Down	4.30E-05	2.43E-05
Acc05428	1278	44	1	-4.440015037	Down	7.52E-09	5.95E-09
Acc15850	1055	44	1	-4.440015037	Down	7.52E-09	5.95E-09
Acc30873	570	22	0	-4.440015037	Down	4.38E-05	2.48E-05
Acc07390	933	22	0	-4.440015037	Down	4.38E-05	2.48E-05
Acc04642	3267	22	0	-4.440015037	Down	4.38E-05	2.48E-05
Acc18061	1929	21.89	0	-4.432783467	Down	4.61E-05	2.60E-05
Acc15289	896	306	7	-4.430616339	Down	2.17E-52	6.57E-52
Acc25479	1027	1569	36	-4.426288054	Down	1.42E-260	1.87E-259
Acc08972	1536	871	20	-4.425184232	Down	1.47E-145	1.08E-144
Acc24075	2543	910.93	21	-4.41946238	Down	4.75E-152	3.64E-151
Acc31969	1465	21.67	0	-4.418210666	Down	5.10E-05	2.86E-05
Acc08599	1858	6028	140	-4.408764103	Down	0	0
Acc11457	1321	21.42	0	-4.401469993	Down	5.73E-05	3.19E-05
Acc05894	999	1365	32	-4.395268654	Down	3.15E-226	3.54E-225
Acc12879	2179	21	0	-4.372900841	Down	6.95E-05	3.83E-05
Acc09798	845	21	0	-4.372900841	Down	6.95E-05	3.83E-05
Acc09705	1236	412	10	-4.34515585	Down	2.83E-69	1.09E-68
Acc21480	700	41	1	-4.338135423	Down	2.90E-08	2.20E-08
Acc09738	1251	163.01	4	-4.329400078	Down	2.06E-28	3.78E-28
Acc09923	1960	20.36	0	-4.328249074	Down	9.35E-05	5.08E-05
Acc23274	2994	20.34	0	-4.326831192	Down	9.43E-05	5.12E-05
Acc09102	697	1496	37	-4.318024512	Down	1.31E-245	1.61E-244
Acc20585	571	20.19	0	-4.316152424	Down	0.000101122	5.47E-05
Acc09101	707	683	17	-4.308862345	Down	4.03E-113	2.39E-112
Acc03804	1699	80	2	-4.302511513	Down	1.05E-14	1.17E-14
Acc18101	975	20	0	-4.302511513	Down	0.000110432	5.94E-05
Acc29871	652	20	0	-4.302511513	Down	0.000110432	5.94E-05
Acc03789	831	20	0	-4.302511513	Down	0.000110432	5.94E-05
Acc02388	1824	20	0	-4.302511513	Down	0.000110432	5.94E-05
Acc19545	909	20	0	-4.302511513	Down	0.000110432	5.94E-05
Acc14650	1089	20	0	-4.302511513	Down	0.000110432	5.94E-05
Acc31209	1412	20	0	-4.302511513	Down	0.000110432	5.94E-05
Acc26259	1073	20	0	-4.302511513	Down	0.000110432	5.94E-05
Acc14012	2879	3506.93	88	-4.297144718	Down	0	0
Acc10108	2186	19.88	0	-4.29382927	Down	0.000116754	6.26E-05
Acc21584	1157	477	12	-4.293466373	Down	1.93E-79	8.31E-79
Acc05330	954	19.87	0	-4.293103385	Down	0.000117297	6.29E-05
Acc11231	2059	4046.95	102.29	-4.286681425	Down	0	0
Acc09796	2249	19.69	0	-4.279974624	Down	0.000127518	6.80E-05
Acc03501	2757	19.65	0	-4.277040825	Down	0.000129909	6.92E-05
Acc16545	1673	94.75	2.42	-4.271630409	Down	4.46E-17	5.53E-17
Acc18154	2349	1443	37	-4.265985637	Down	1.57E-235	1.84E-234
Acc19972	865	39	1	-4.265985637	Down	7.15E-08	5.27E-08
Acc28028	1676	39	1	-4.265985637	Down	7.15E-08	5.27E-08
Acc22614	1928	1593	41	-4.260561965	Down	1.28E-259	1.68E-258
Acc14777	947	1120	29	-4.25188544	Down	5.79E-183	5.33E-182
Acc33669	1917	2890	75	-4.248618505	Down	0	0
Acc07068	695	77	2	-4.247369959	Down	3.99E-14	4.33E-14
Acc11291	1606	6401	168	-4.232347588	Down	0	0
Acc02890	607	19	0	-4.228510931	Down	0.000175759	9.21E-05
Acc07547	631	19	0	-4.228510931	Down	0.000175759	9.21E-05
Acc22749	1876	19	0	-4.228510931	Down	0.000175759	9.21E-05
Acc15176	895	19	0	-4.228510931	Down	0.000175759	9.21E-05
Acc00860	1806	19	0	-4.228510931	Down	0.000175759	9.21E-05
Acc05116	935	18.97	0	-4.226231192	Down	0.000178232	9.34E-05
Acc19698	2075	2630	70	-4.212147485	Down	0	0
Acc25631	1547	18.76	0	-4.210171341	Down	0.000196552	0.000102407
Acc10997	3026	18.71	0	-4.206321071	Down	0.000201187	0.000104655
Acc28785	1724	5599.96	150	-4.202965534	Down	0	0
Acc18777	3607	18.64	0	-4.200913373	Down	0.000207863	0.000107899
Acc23753	2439	149	4	-4.199751938	Down	9.98E-26	1.69E-25
Acc27866	975	111	3	-4.190036784	Down	1.49E-19	2.05E-19
Acc20542	1924	37	1	-4.190036784	Down	1.77E-07	1.26E-07
Acc03580	724	18	0	-4.150508419	Down	0.000280267	0.000142929
Acc24052	1011	18	0	-4.150508419	Down	0.000280267	0.000142929
Acc07786	2101	18	0	-4.150508419	Down	0.000280267	0.000142929
Acc22792	1310	18	0	-4.150508419	Down	0.000280267	0.000142929
Acc29993	1504	18	0	-4.150508419	Down	0.000280267	0.000142929
Acc07326	613	18	0	-4.150508419	Down	0.000280267	0.000142929
Acc32113	1995	18	0	-4.150508419	Down	0.000280267	0.000142929
Acc19281	1688	17.98	0	-4.148904534	Down	0.0002829	0.000144199
Acc29200	879	2624	73	-4.148310864	Down	0	0
Acc33496	865	17.84	0	-4.137627128	Down	0.000302047	0.000153415
Acc09484	808	71	2	-4.130330537	Down	5.80E-13	5.91E-13
Acc11815	1341	2053	58	-4.126120335	Down	0	0
Acc25124	841	493	14	-4.118672332	Down	2.96E-80	1.29E-79
Acc31518	515	386	11	-4.113608837	Down	3.38E-63	1.19E-62
Acc20056	827	473.95	13.52	-4.112151229	Down	3.70E-77	1.56E-76
Acc20769	892	17.51	0	-4.110690597	Down	0.000352517	0.0001776
Acc17507	1210	69	2	-4.089107875	Down	1.42E-12	1.42E-12
Acc12085	1012	6642	193	-4.085528388	Down	0	0
Acc29776	1371	68	2	-4.068046259	Down	2.21E-12	2.19E-12
Acc28097	718	34	1	-4.068046259	Down	6.90E-07	4.67E-07
Acc31836	804	17	0	-4.068046259	Down	0.000447786	0.000222484
Acc18832	1901	17	0	-4.068046259	Down	0.000447786	0.000222484
Acc06063	1390	17	0	-4.068046259	Down	0.000447786	0.000222484
Acc03490	2472	17	0	-4.068046259	Down	0.000447786	0.000222484
Acc11212	1013	17	0	-4.068046259	Down	0.000447786	0.000222484
Acc17085	1167	17	0	-4.068046259	Down	0.000447786	0.000222484
Acc23421	1914	17	0	-4.068046259	Down	0.000447786	0.000222484
Acc31796	1885	17	0	-4.068046259	Down	0.000447786	0.000222484
Acc31816	1517	2609.24	77.15	-4.060403101	Down	0	0
Acc04864	1426	13826	412	-4.049179101	Down	0	0
Acc32478	1658	336.31	10.04	-4.046543921	Down	8.77E-55	2.76E-54
Acc21716	2711	33.28	1	-4.037166946	Down	9.57E-07	6.38E-07
Acc23565	739	33	1	-4.024977537	Down	1.09E-06	7.21E-07
Acc18104	1091	16.48	0	-4.023227755	Down	0.000571776	0.000280262
Acc28434	748	1086	33	-4.020997686	Down	5.23E-172	4.56E-171
Acc11275	1401	16.22	0	-4.000285332	Down	0.000646235	0.000314238
Acc02755	861	16.09	0	-3.988675839	Down	0.00068706	0.000332909
Acc10563	2412	64	2	-3.980583418	Down	1.32E-11	1.25E-11
Acc32449	2073	64	2	-3.980583418	Down	1.32E-11	1.25E-11
Acc13728	1310	16	0	-3.980583418	Down	0.000716838	0.000346098
Acc14453	516	16	0	-3.980583418	Down	0.000716838	0.000346098
Acc33528	922	38.65	1.22	-3.966098779	Down	1.50E-07	1.08E-07
Acc32504	1209	63	2	-3.957863341	Down	2.07E-11	1.94E-11
Acc27211	1692	911.99	29	-3.955476618	Down	2.48E-143	1.80E-142
Acc01240	1164	91.51	2.91	-3.955421766	Down	6.77E-16	7.95E-16
Acc18698	1088	125	4	-3.946367703	Down	4.09E-21	5.95E-21
Acc22761	927	156	5	-3.944057542	Down	6.08E-26	1.04E-25
Acc19478	2073	15.59	0	-3.943132441	Down	0.000869867	0.000415386
Acc29673	648	467	15	-3.940971562	Down	3.59E-74	1.46E-73
Acc19793	1913	19163	616	-3.939832692	Down	0	0
Acc32092	894	2706	87	-3.939586046	Down	0	0
Acc01517	583	217	7	-3.934779728	Down	2.20E-35	4.81E-35
Acc27732	1706	31	1	-3.934779728	Down	2.71E-06	1.73E-06
Acc10226	648	3507	114	-3.923715119	Down	0	0
Acc28500	2616	15.38	0	-3.923567016	Down	0.000960615	0.000455956
Acc00022	1100	13087.16	426.79	-3.919065292	Down	0	0
Acc19183	833	3560.58	116.16	-3.918510422	Down	0	0
Acc23350	1865	13985.43	462	-3.900471368	Down	0	0
Acc01050	1426	1573	52	-3.899446655	Down	1.65E-243	2.00E-242
Acc32114	1035	30	1	-3.887474014	Down	4.27E-06	2.68E-06
Acc16880	2724	15	0	-3.887474014	Down	0.00114982	0.000539538
Acc19411	3820	15	0	-3.887474014	Down	0.00114982	0.000539538
Acc04677	1487	15	0	-3.887474014	Down	0.00114982	0.000539538
Acc11800	1658	15	0	-3.887474014	Down	0.00114982	0.000539538
Acc00782	456	15	0	-3.887474014	Down	0.00114982	0.000539538
Acc06457	461	15	0	-3.887474014	Down	0.00114982	0.000539538
Acc27834	766	15	0	-3.887474014	Down	0.00114982	0.000539538
Acc23818	2480	15	0	-3.887474014	Down	0.00114982	0.000539538
Acc14827	1904	15	0	-3.887474014	Down	0.00114982	0.000539538
Acc07543	777	15	0	-3.887474014	Down	0.00114982	0.000539538
Acc23022	1084	14.82	0	-3.870056961	Down	0.001252157	0.000584647
Acc13864	1353	14.7	0	-3.858327668	Down	0.001325441	0.000616664
Acc20672	681	88	3	-3.855052536	Down	4.07E-15	4.63E-15
Acc26530	1297	87.99	3	-3.854888584	Down	4.09E-15	4.65E-15
Acc31459	919	14.53	0	-3.841546216	Down	0.001436731	0.000665738
Acc31733	719	29	1	-3.838564413	Down	6.75E-06	4.15E-06
Acc14373	1666	29	1	-3.838564413	Down	6.75E-06	4.15E-06
Acc30947	1498	29	1	-3.838564413	Down	6.75E-06	4.15E-06
Acc03002	641	29	1	-3.838564413	Down	6.75E-06	4.15E-06
Acc20315	1779	29.53	1.02	-3.836123717	Down	5.59E-06	3.46E-06
Acc06337	1180	14.45	0	-3.833581006	Down	0.001492319	0.000689657
Acc14867	1026	121.46	4.21	-3.831100649	Down	3.37E-20	4.74E-20
Acc02556	1522	20.45	0	-3.828721426	Down	0.000158813	8.37E-05
Acc10516	1701	14.39	0	-3.827578105	Down	0.00153543	0.000707375
Acc07959	1423	17092	594	-3.827297899	Down	0	0
Acc30541	743	516	18	-3.821885672	Down	3.62E-80	1.57E-79
Acc33314	1915	97.38	3.41	-3.816365274	Down	1.83E-16	2.21E-16
Acc27221	800	57	2	-3.813473432	Down	3.03E-10	2.64E-10
Acc06341	1424	57	2	-3.813473432	Down	3.03E-10	2.64E-10
Acc11388	598	14.23	0	-3.811447175	Down	0.001656637	0.000759225
Acc27540	1334	566.77	20	-3.805274909	Down	1.29E-87	6.16E-87
Acc08853	1742	8322	294	-3.803625646	Down	0	0
Acc13779	1096	14.1	0	-3.798206676	Down	0.001762195	0.000804201
Acc28380	2890	14.09	0	-3.797183125	Down	0.001770591	0.000807923
Acc08353	769	28	1	-3.78793834	Down	1.07E-05	6.43E-06
Acc26028	1281	14	0	-3.78793834	Down	0.00184799	0.000840623
Acc33350	476	14	0	-3.78793834	Down	0.00184799	0.000840623
Acc19670	1100	14	0	-3.78793834	Down	0.00184799	0.000840623
Acc16500	1863	14	0	-3.78793834	Down	0.00184799	0.000840623
Acc23150	1202	14	0	-3.78793834	Down	0.00184799	0.000840623
Acc28883	814	14	0	-3.78793834	Down	0.00184799	0.000840623
Acc10752	1261	14	0	-3.78793834	Down	0.00184799	0.000840623
Acc07641	1904	13.95	0	-3.782776635	Down	0.001892456	0.000859678
Acc17885	3423	13.9	0	-3.777596396	Down	0.001938001	0.000878941
Acc18920	1560	2084	75	-3.77690429	Down	0	0
Acc14580	734	222	8	-3.774999284	Down	3.18E-35	6.93E-35
Acc03398	2159	13.83	0	-3.770312669	Down	0.002003629	0.000906462
Acc11869	1873	13.73	0	-3.759843138	Down	0.002101291	0.000947391
Acc03838	1364	13.68	0	-3.754579743	Down	0.002151909	0.000968763
Acc20352	458	1467	54	-3.744349072	Down	3.74E-221	4.10E-220
Acc25530	730	54	2	-3.73547092	Down	1.16E-09	9.74E-10
Acc25300	1458	27	1	-3.73547092	Down	1.68E-05	9.95E-06
Acc17420	664	27	1	-3.73547092	Down	1.68E-05	9.95E-06
Acc30835	1109	27	1	-3.73547092	Down	1.68E-05	9.95E-06
Acc03411	1340	27	1	-3.73547092	Down	1.68E-05	9.95E-06
Acc21858	1741	27	1	-3.73547092	Down	1.68E-05	9.95E-06
Acc27921	2650	163.83	6.08	-3.732567847	Down	3.09E-26	5.31E-26
Acc20263	987	5044	189	-3.718693554	Down	0	0
Acc00606	608	80	3	-3.717549012	Down	1.42E-13	1.50E-13
Acc00494	921	3466	130	-3.717271544	Down	0	0
Acc07174	1331	4741	179	-3.707743318	Down	0	0
Acc01703	1183	608	23	-3.704948975	Down	3.78E-92	1.89E-91
Acc07203	5396	521.61	19.79	-3.700711429	Down	2.91E-79	1.25E-78
Acc10326	1483	4085	155	-3.700579376	Down	0	0
Acc27707	1893	205.4	7.85	-3.690183135	Down	3.19E-32	6.48E-32
Acc27890	1791	104	4	-3.681023136	Down	4.43E-17	5.49E-17
Acc08776	1934	52	2	-3.681023136	Down	2.84E-09	2.32E-09
Acc02572	1711	26	1	-3.681023136	Down	2.66E-05	1.54E-05
Acc32750	432	26	1	-3.681023136	Down	2.66E-05	1.54E-05
Acc27412	4271	272.63	10.49	-3.680441159	Down	3.94E-42	9.92E-42
Acc08054	1225	359	14	-3.66106853	Down	1.03E-54	3.25E-54
Acc15252	691	5385.96	210.66	-3.656798626	Down	0	0
Acc26790	620	51	2	-3.65300876	Down	4.45E-09	3.58E-09
Acc21656	970	2081	82	-3.646092663	Down	6.23E-307	9.64E-306
Acc28667	780	76	3	-3.643548431	Down	8.38E-13	8.47E-13
Acc27283	1880	126	5	-3.635935247	Down	3.40E-20	4.79E-20
Acc23541	1230	25	1	-3.624439608	Down	4.21E-05	2.38E-05
Acc31678	1396	25	1	-3.624439608	Down	4.21E-05	2.38E-05
Acc06279	2173	5318	213	-3.62254186	Down	0	0
Acc05155	2248	2820	113	-3.621883903	Down	0	0
Acc16522	1612	13258.2	536	-3.609091528	Down	0	0
Acc17164	1806	172	7	-3.599493251	Down	8.67E-27	1.52E-26
Acc09256	1175	48.76	2	-3.588209639	Down	1.21E-08	9.45E-09
Acc29874	1019	485	20	-3.58049626	Down	4.25E-72	1.70E-71
Acc16779	843	72	3	-3.565545919	Down	4.93E-12	4.77E-12
Acc14271	1766	24	1	-3.565545919	Down	6.66E-05	3.68E-05
Acc23332	1897	24	1	-3.565545919	Down	6.66E-05	3.68E-05
Acc06349	1877	24	1	-3.565545919	Down	6.66E-05	3.68E-05
Acc08620	2000	24	1	-3.565545919	Down	6.66E-05	3.68E-05
Acc14293	2117	151.12	6.3	-3.564782386	Down	1.42E-23	2.26E-23
Acc06987	1269	1579	66	-3.560984754	Down	2.43E-229	2.77E-228
Acc03029	935	95	4	-3.550439026	Down	2.34E-15	2.69E-15
Acc28678	1463	95	4	-3.550439026	Down	2.34E-15	2.69E-15
Acc09984	1988	458.27	19.35	-3.546375791	Down	9.65E-68	3.64E-67
Acc26768	807	213	9	-3.545368037	Down	2.02E-32	4.13E-32
Acc11672	1634	40.35	1.71	-3.541083861	Down	2.50E-07	1.76E-07
Acc06612	1310	1228.01	52.18	-3.537264973	Down	6.42E-178	5.75E-177
Acc23655	862	47	2	-3.53517227	Down	2.66E-08	2.02E-08
Acc03402	985	5248	224	-3.530780501	Down	0	0
Acc30025	1168	488	21	-3.519003333	Down	1.35E-71	5.34E-71
Acc02490	605	208	9	-3.511098135	Down	1.79E-31	3.57E-31
Acc31462	1603	158.68	6.87	-3.510249811	Down	2.13E-24	3.46E-24
Acc23910	1510	207.76	9	-3.509432525	Down	1.99E-31	3.96E-31
Acc31278	977	23	1	-3.504145374	Down	0.000105333	5.69E-05
Acc21004	1212	23	1	-3.504145374	Down	0.000105333	5.69E-05
Acc24566	798	23	1	-3.504145374	Down	0.000105333	5.69E-05
Acc19984	1512	182	8	-3.488378058	Down	1.29E-27	2.33E-27
Acc23969	702	97.58	4.31	-3.481409127	Down	1.62E-15	1.88E-15
Acc12684	1300	4729	209	-3.480543712	Down	0	0
Acc28889	1825	45	2	-3.472436514	Down	6.49E-08	4.79E-08
Acc15800	2405	132.06	5.87	-3.472272655	Down	2.07E-20	2.93E-20
Acc16940	649	41.62	1.85	-3.472263207	Down	2.02E-07	1.43E-07
Acc10263	1778	67	3	-3.461710108	Down	4.49E-11	4.11E-11
Acc06116	1950	274.95	12.32	-3.460678543	Down	1.32E-40	3.22E-40
Acc30730	868	4725	212	-3.458761577	Down	0	0
Acc00064	1037	111	5	-3.453071189	Down	2.46E-17	3.09E-17
Acc06869	1509	6881	310	-3.452861541	Down	0	0
Acc09597	1219	399	18	-3.450903353	Down	5.36E-58	1.77E-57
Acc13337	1152	4319.62	195	-3.449941792	Down	0	0
Acc29707	1406	143.97	6.5	-3.449768109	Down	5.30E-22	7.98E-22
Acc11192	1044	177	8	-3.448188968	Down	1.14E-26	2.00E-26
Acc31489	1209	48.23	2.18	-3.448114188	Down	2.41E-08	1.84E-08
Acc23653	854	44	2	-3.440015037	Down	1.01E-07	7.36E-08
Acc12858	839	22	1	-3.440015037	Down	0.000166601	8.76E-05
Acc03349	673	22	1	-3.440015037	Down	0.000166601	8.76E-05
Acc25663	697	22	1	-3.440015037	Down	0.000166601	8.76E-05
Acc32774	716	22	1	-3.440015037	Down	0.000166601	8.76E-05
Acc20629	1967	22	1	-3.440015037	Down	0.000166601	8.76E-05
Acc01307	630	2500	114	-3.435405783	Down	0	0
Acc00071	1566	1260	58	-3.421810441	Down	8.31E-178	7.43E-177
Acc29295	775	738	34	-3.420597583	Down	6.08E-105	3.40E-104
Acc26306	615	677.78	31.36	-3.41440302	Down	2.13E-96	1.11E-95
Acc21456	1430	448.99	20.82	-3.411224758	Down	1.91E-64	6.86E-64
Acc16739	2011	130.94	6.08	-3.409274168	Down	5.61E-20	7.83E-20
Acc28564	2768	1161	54	-3.406848173	Down	2.03E-163	1.66E-162
Acc05504	1687	34.39	1.61	-3.39743994	Down	2.82E-06	1.80E-06
Acc25755	1757	85	4	-3.389974354	Down	1.89E-13	1.98E-13
Acc25351	2456	590.49	27.82	-3.388301721	Down	1.03E-83	4.68E-83
Acc25135	2932	1692	80	-3.383169176	Down	7.30E-236	8.56E-235
Acc24029	1303	486	23	-3.381833966	Down	4.00E-69	1.53E-68
Acc10128	1686	232	11	-3.379132794	Down	6.71E-34	1.42E-33
Acc13155	1802	126	6	-3.372900841	Down	3.97E-19	5.37E-19
Acc04244	1457	21	1	-3.372900841	Down	0.000263482	0.000134901
Acc26752	497	21	1	-3.372900841	Down	0.000263482	0.000134901
Acc33010	1239	21	1	-3.372900841	Down	0.000263482	0.000134901
Acc09188	1265	21	1	-3.372900841	Down	0.000263482	0.000134901
Acc07825	1364	21	1	-3.372900841	Down	0.000263482	0.000134901
Acc28102	2626	49.95	2.39	-3.365985573	Down	1.88E-08	1.45E-08
Acc29104	1845	14442	692	-3.363938118	Down	0	0
Acc04093	719	1397	67	-3.362610533	Down	3.93E-194	3.82E-193
Acc18997	2580	3429.19	164.49	-3.362379475	Down	0	0
Acc03726	1536	271	13	-3.362292741	Down	3.73E-39	8.85E-39
Acc16925	1535	5712.02	274.82	-3.358025544	Down	0	0
Acc27855	2171	973	47	-3.352290561	Down	1.74E-135	1.20E-134
Acc05962	980	413	20	-3.348653295	Down	1.50E-58	5.01E-58
Acc30052	1479	3283	159	-3.348499497	Down	0	0
Acc13999	4724	203.41	9.92	-3.338490094	Down	1.21E-29	2.29E-29
Acc05929	2345	31577	1544	-3.334712874	Down	0	0
Acc08665	500	3677	180	-3.333043783	Down	0	0
Acc18998	2267	275.81	13.51	-3.332158604	Down	1.57E-39	3.74E-39
Acc16108	918	591.22	29	-3.330153687	Down	1.23E-82	5.52E-82
Acc32081	1022	2422	119	-3.327748804	Down	0	0
Acc30666	1323	4374	215	-3.327128073	Down	0	0
Acc00522	1429	203	10	-3.32399124	Down	1.74E-29	3.29E-29
Acc15799	2398	248.52	12.25	-3.323091723	Down	1.03E-35	2.28E-35
Acc20549	1133	186.11	9.18	-3.32210103	Down	3.70E-27	6.56E-27
Acc28692	1595	5509.16	272.09	-3.320259941	Down	0	0
Acc10876	1010	68.17	3.37	-3.318899905	Down	6.59E-11	5.99E-11
Acc04398	1478	1737	86	-3.316700702	Down	4.06E-238	4.83E-237
Acc22787	1096	1069	53	-3.314709101	Down	2.89E-147	2.15E-146
Acc02091	2292	286.19	14.2	-3.313593846	Down	9.08E-41	2.22E-40
Acc32847	1198	141	7	-3.312779848	Down	6.39E-21	9.24E-21
Acc22478	2083	2254	112	-3.311500296	Down	6.08E-308	9.44E-307
Acc04413	1079	402	20	-3.309707014	Down	1.71E-56	5.52E-56
Acc28527	1569	21.09	1.05	-3.30868128	Down	0.000286604	0.000146013
Acc13970	1980	20.06	1	-3.306833119	Down	0.000405324	0.000202826
Acc11014	3242	120	6	-3.302511513	Down	5.38E-18	6.95E-18
Acc04629	790	60	3	-3.302511513	Down	9.78E-10	8.24E-10
Acc00410	559	40	2	-3.302511513	Down	6.00E-07	4.08E-07
Acc16749	931	20	1	-3.302511513	Down	0.000416618	0.000208075
Acc14402	1496	20	1	-3.302511513	Down	0.000416618	0.000208075
Acc22889	909	20	1	-3.302511513	Down	0.000416618	0.000208075
Acc17153	2941	500.33	25.02	-3.302309683	Down	9.82E-70	3.80E-69
Acc22393	1179	5029	252	-3.299359333	Down	0	0
Acc19067	835	1316	66	-3.298133072	Down	4.67E-180	4.24E-179
Acc07947	3037	202.29	10.16	-3.296036114	Down	3.44E-29	6.46E-29
Acc06012	2015	438	22	-3.295938859	Down	3.53E-61	1.22E-60
Acc24077	2013	219	11	-3.295938859	Down	1.84E-31	3.66E-31
Acc09204	1829	24539	1234	-3.294245577	Down	0	0
Acc05030	2500	3955.02	199	-3.293428072	Down	0	0
Acc27911	1200	8641.48	436.87	-3.286585894	Down	0	0
Acc15592	1882	237	12	-3.284364166	Down	8.22E-34	1.73E-33
Acc07008	681	1262	64	-3.282079613	Down	4.87E-172	4.25E-171
Acc30351	1359	4174.48	212.38	-3.277460098	Down	0	0
Acc04175	1076	156	8	-3.265985637	Down	1.02E-22	1.57E-22
Acc00066	645	39	2	-3.265985637	Down	9.35E-07	6.24E-07
Acc21398	1469	39	2	-3.265985637	Down	9.35E-07	6.24E-07
Acc29421	2199	661.3	34	-3.262281668	Down	1.26E-90	6.23E-90
Acc26726	526	622	32	-3.261354188	Down	2.48E-85	1.15E-84
Acc32296	1168	136	7	-3.260691337	Down	5.54E-20	7.74E-20
Acc19182	965	461.75	23.77	-3.260481571	Down	8.17E-64	2.91E-63
Acc02832	2238	110852.78	5710.5	-3.259467488	Down	0	0
Acc08823	912	204.99	10.57	-3.258089669	Down	2.80E-29	5.27E-29
Acc17617	1937	8536.14	445	-3.242290015	Down	0	0
Acc25036	1761	57.41	3	-3.238851068	Down	3.04E-09	2.48E-09
Acc11078	1083	933	49	-3.231606845	Down	4.98E-126	3.23E-125
Acc31300	585	76	4	-3.228510931	Down	9.59E-12	9.13E-12
Acc21849	678	76	4	-3.228510931	Down	9.59E-12	9.13E-12
Acc25499	761	57	3	-3.228510931	Down	3.64E-09	2.95E-09
Acc09573	1948	19	1	-3.228510931	Down	0.000658539	0.000319773
Acc22630	1575	19	1	-3.228510931	Down	0.000658539	0.000319773
Acc28989	1615	19	1	-3.228510931	Down	0.000658539	0.000319773
Acc17026	1229	19	1	-3.228510931	Down	0.000658539	0.000319773
Acc20287	1201	19	1	-3.228510931	Down	0.000658539	0.000319773
Acc04284	1108	19	1	-3.228510931	Down	0.000658539	0.000319773
Acc22996	2226	1084.42	57.09	-3.228125172	Down	5.07E-146	3.75E-145
Acc07662	827	189	10	-3.220897747	Down	7.20E-27	1.27E-26
Acc15582	702	623	33	-3.219277652	Down	1.61E-84	7.37E-84
Acc23803	1099	6546	348	-3.214037809	Down	0	0
Acc16673	1216	199.83	10.63	-3.213143104	Down	2.94E-28	5.40E-28
Acc12935	1085	744	40	-3.197814134	Down	5.59E-100	3.00E-99
Acc05202	1429	55.91	3.01	-3.195854371	Down	6.00E-09	4.77E-09
Acc17657	1759	352	19	-3.192087523	Down	3.36E-48	9.44E-48
Acc23529	959	37	2	-3.190036784	Down	2.27E-06	1.46E-06
Acc15805	926	37	2	-3.190036784	Down	2.27E-06	1.46E-06
Acc00956	2021	37	2	-3.190036784	Down	2.27E-06	1.46E-06
Acc00506	1107	92	5	-3.182217279	Down	9.51E-14	1.01E-13
Acc01818	2193	6654	365	-3.168836915	Down	0	0
Acc15255	699	7195.26	395	-3.167705679	Down	0	0
Acc09690	1911	1310	72	-3.166009513	Down	5.52E-173	4.83E-172
Acc28670	2011	636	35	-3.164183356	Down	5.94E-85	2.74E-84
Acc27894	653	109	6	-3.163805242	Down	6.20E-16	7.29E-16
Acc08152	2355	1180	65	-3.162786749	Down	7.04E-156	5.51E-155
Acc08760	2884	1574.26	87	-3.158098038	Down	5.36E-207	5.59E-206
Acc23118	5328	4010.02	222	-3.155561268	Down	0	0
Acc10386	2410	4589.87	254.19	-3.15505753	Down	0	0
Acc07919	1587	4740.04	263	-3.152347947	Down	0	0
Acc23405	1017	198	11	-3.150508419	Down	1.49E-27	2.68E-27
Acc06090	1607	54	3	-3.150508419	Down	1.35E-08	1.05E-08
Acc02267	533	18	1	-3.150508419	Down	0.001040436	0.000491529
Acc05379	1617	18	1	-3.150508419	Down	0.001040436	0.000491529
Acc06615	2208	18	1	-3.150508419	Down	0.001040436	0.000491529
Acc14916	1864	18	1	-3.150508419	Down	0.001040436	0.000491529
Acc11246	1056	18	1	-3.150508419	Down	0.001040436	0.000491529
Acc19663	3233	352.78	19.65	-3.146750974	Down	1.05E-47	2.91E-47
Acc08390	953	22004	1231	-3.140446559	Down	0	0
Acc06264	1384	2037	114	-3.139923669	Down	7.84E-266	1.06E-264
Acc24840	1558	278.59	15.65	-3.134492329	Down	6.52E-38	1.51E-37
Acc09355	485	89	5	-3.134388754	Down	3.46E-13	3.57E-13
Acc16997	1175	249	14	-3.133230428	Down	4.69E-34	9.94E-34
Acc19047	875	9400.53	530.17	-3.128798574	Down	0	0
Acc09665	973	284.35	16.04	-3.128505175	Down	1.35E-38	3.16E-38
Acc30726	1134	1256	71	-3.125457047	Down	5.00E-164	4.12E-163
Acc12319	1396	336	19	-3.124973327	Down	3.03E-45	8.07E-45
Acc13651	2164	159	9	-3.123541372	Down	2.78E-22	4.22E-22
Acc11084	875	70.24	3.98	-3.122035927	Down	1.11E-10	9.94E-11
Acc10237	1355	440	25	-3.118086942	Down	1.40E-58	4.66E-58
Acc22506	2455	4733	270	-3.112307028	Down	0	0
Acc22141	1424	12791	730	-3.111672202	Down	0	0
Acc00678	580	11183	642	-3.103173574	Down	0	0
Acc28514	495	87	5	-3.101598819	Down	8.18E-13	8.27E-13
Acc30044	938	626	36	-3.100677263	Down	3.81E-82	1.69E-81
Acc30463	1130	17.37	1	-3.099109267	Down	0.001387436	0.000644051
Acc28256	2023	2082	120	-3.097447176	Down	2.64E-268	3.60E-267
Acc10613	1485	52	3	-3.096060635	Down	3.21E-08	2.43E-08
Acc10851	1681	1784	103	-3.094982791	Down	4.87E-230	5.58E-229
Acc27730	1642	2181	126	-3.094077549	Down	1.12E-280	1.61E-279
Acc12279	1217	16009.58	924.97	-3.093968493	Down	0	0
Acc22875	1360	5242	304	-3.088557543	Down	0	0
Acc22643	1725	11756	683	-3.085951293	Down	0	0
Acc10059	3612	1048.62	61.32	-3.076573878	Down	2.55E-135	1.76E-134
Acc12091	1121	171	10	-3.076507838	Down	1.56E-23	2.47E-23
Acc08794	1670	290	17	-3.073029667	Down	1.04E-38	2.43E-38
Acc04128	1782	136	8	-3.068046259	Down	5.36E-19	7.20E-19
Acc00969	864	68	4	-3.068046259	Down	3.05E-10	2.65E-10
Acc25154	1270	51	3	-3.068046259	Down	4.96E-08	3.69E-08
Acc27878	1056	34	2	-3.068046259	Down	8.50E-06	5.17E-06
Acc21359	927	34	2	-3.068046259	Down	8.50E-06	5.17E-06
Acc10077	373	17	1	-3.068046259	Down	0.001642716	0.000753462
Acc28563	2633	17	1	-3.068046259	Down	0.001642716	0.000753462
Acc03245	798	17	1	-3.068046259	Down	0.001642716	0.000753462
Acc00940	814	17	1	-3.068046259	Down	0.001642716	0.000753462
Acc04086	802	424	25	-3.064647683	Down	1.21E-55	3.85E-55
Acc24588	727	286	17	-3.052991914	Down	5.61E-38	1.30E-37
Acc04815	1805	403	24	-3.050256946	Down	9.42E-53	2.88E-52
Acc13914	1288	171	10.2	-3.047938686	Down	2.42E-23	3.81E-23
Acc23519	1479	50	3	-3.039477107	Down	7.64E-08	5.61E-08
Acc02151	1043	83	5	-3.033694754	Down	4.53E-12	4.40E-12
Acc04525	1308	1155	70	-3.024977537	Down	1.60E-146	1.19E-145
Acc01359	632	33	2	-3.024977537	Down	1.32E-05	7.86E-06
Acc14528	740	593	36	-3.022546711	Down	4.10E-76	1.71E-75
Acc07976	1321	148	9	-3.020111782	Down	2.97E-20	4.18E-20
Acc32613	1207	312	19	-3.018058123	Down	7.63E-41	1.87E-40
Acc29873	1087	6808	415	-3.016631213	Down	0	0
Acc03023	1843	7756	474	-3.012937257	Down	0	0
Acc09519	682	49	3	-3.010330761	Down	1.18E-07	8.50E-08
Acc31822	1642	49	3	-3.010330761	Down	1.18E-07	8.50E-08
Acc16523	1545	749	46	-3.00584337	Down	3.84E-95	1.98E-94
Acc02109	1828	830	51	-3.005125602	Down	3.37E-105	1.89E-104
Acc22026	851	1497	92	-3.004879968	Down	4.11E-188	3.88E-187
Acc16987	1551	873.11	53.75	-3.002410183	Down	1.82E-110	1.06E-109
Acc05159	3308	8779	543	-2.995615929	Down	0	0
Acc31861	1472	11566	716	-2.994370028	Down	0	0
Acc05656	2745	1178	73	-2.992882683	Down	6.68E-148	5.00E-147
Acc20497	1024	3432	213	-2.990707635	Down	0	0
Acc17469	790	6313.61	392.26	-2.989166432	Down	0	0
Acc30983	1388	6928.34	432.9	-2.980987443	Down	0	0
Acc01198	738	128	8	-2.980583418	Down	1.59E-17	2.01E-17
Acc00676	407	48	3	-2.980583418	Down	1.81E-07	1.29E-07
Acc13158	1722	7399	463	-2.978829618	Down	0	0
Acc04997	1131	527	33	-2.97784845	Down	6.52E-67	2.42E-66
Acc16651	606	31.66	1.99	-2.972404338	Down	2.32E-05	1.35E-05
Acc12728	2119	15741	990	-2.971538278	Down	0	0
Acc18963	816	3609	228	-2.965076832	Down	0	0
Acc07426	1023	110	7	-2.954588209	Down	3.69E-15	4.20E-15
Acc15852	1291	110	7	-2.954588209	Down	3.69E-15	4.20E-15
Acc02838	1183	2604	166	-2.95205772	Down	0	0
Acc04980	1737	12377	793	-2.944780411	Down	0	0
Acc32505	512	78	5	-2.944057542	Down	3.80E-11	3.50E-11
Acc05053	1681	142.5	9.14	-2.943207362	Down	4.07E-19	5.49E-19
Acc22287	767	327.02	21	-2.941501056	Down	1.01E-41	2.54E-41
Acc27004	3382	22018.99	1414	-2.941477687	Down	0	0
Acc04140	1263	606	39	-2.938355183	Down	1.07E-75	4.44E-75
Acc32319	2552	31	2	-2.934779728	Down	3.16E-05	1.81E-05
Acc00414	1061	31	2	-2.934779728	Down	3.16E-05	1.81E-05
Acc26097	1502	185	12	-2.927002378	Down	3.21E-24	5.17E-24
Acc15280	871	2209	144	-2.91983612	Down	5.15E-269	7.06E-268
Acc24047	1073	230	15	-2.919182873	Down	1.23E-29	2.33E-29
Acc30992	1394	61	4	-2.911320756	Down	6.07E-09	4.83E-09
Acc00141	1710	3826	251	-2.910661022	Down	0	0
Acc05691	1468	837	55	-2.908307517	Down	8.52E-103	4.67E-102
Acc09743	674	1561.39	102.74	-2.906344469	Down	6.65E-190	6.35E-189
Acc11829	5688	1179.14	77.59	-2.906303902	Down	6.54E-144	4.75E-143
Acc12381	918	151	10	-2.897060062	Down	7.09E-20	9.86E-20
Acc25376	2030	770.11	51.01	-2.896795943	Down	2.27E-94	1.16E-93
Acc07006	843	332.13	22	-2.896756031	Down	9.82E-42	2.46E-41
Acc16750	3077	75.71	5.03	-2.892436981	Down	1.07E-10	9.57E-11
Acc00867	571	30	2	-2.887474014	Down	4.88E-05	2.74E-05
Acc15792	976	30	2	-2.887474014	Down	4.88E-05	2.74E-05
Acc29055	1154	30	2	-2.887474014	Down	4.88E-05	2.74E-05
Acc25372	2521	315.41	21.04	-2.886605209	Down	1.37E-39	3.29E-39
Acc29073	2226	419	28	-2.88403493	Down	5.74E-52	1.73E-51
Acc18636	557	224	15	-2.881047744	Down	1.49E-28	2.75E-28
Acc03321	1461	566	38	-2.877314147	Down	2.11E-69	8.12E-69
Acc18019	1402	216.62	14.57	-2.874677085	Down	1.31E-27	2.35E-27
Acc32284	3610	2080.01	139.97	-2.873984332	Down	1.68E-249	2.10E-248
Acc01550	630	74	5	-2.868108689	Down	2.06E-10	1.82E-10
Acc09883	1969	74	5	-2.868108689	Down	2.06E-10	1.82E-10
Acc03324	904	59	4	-2.863226467	Down	1.42E-08	1.10E-08
Acc14032	1113	616.68	41.81	-2.863185527	Down	4.37E-75	1.80E-74
Acc12053	1503	6969	473	-2.861622984	Down	0	0
Acc07204	901	309	21	-2.859729023	Down	1.80E-38	4.19E-38
Acc30213	795	103	7	-2.859729023	Down	6.96E-14	7.46E-14
Acc10027	1182	6472	440	-2.859219597	Down	0	0
Acc23005	1290	44	3	-2.855052536	Down	1.01E-06	6.69E-07
Acc04259	675	44	3	-2.855052536	Down	1.01E-06	6.69E-07
Acc03855	691	746.09	51	-2.851363937	Down	4.47E-90	2.19E-89
Acc13815	2044	292	20	-2.848479882	Down	2.60E-36	5.79E-36
Acc08201	2187	5470.2	375	-2.847214499	Down	0	0
Acc18978	899	233	16	-2.844769563	Down	2.80E-29	5.27E-29
Acc28016	1290	509.01	35.04	-2.841202738	Down	7.88E-62	2.73E-61
Acc09301	1506	58	4	-2.838564413	Down	2.16E-08	1.66E-08
Acc05595	1519	29	2	-2.838564413	Down	7.54E-05	4.14E-05
Acc12073	662	29	2	-2.838564413	Down	7.54E-05	4.14E-05
Acc18972	790	29	2	-2.838564413	Down	7.54E-05	4.14E-05
Acc31198	709	173	12	-2.830249145	Down	4.71E-22	7.11E-22
Acc26725	597	889	62	-2.822426716	Down	7.08E-106	3.98E-105
Acc00069	1591	129	9	-2.821885672	Down	8.50E-17	1.04E-16
Acc12848	540	43	3	-2.821885672	Down	1.54E-06	1.01E-06
Acc11663	1069	1301	91	-2.818194025	Down	8.63E-154	6.67E-153
Acc16740	956	18.14	1.27	-2.816857472	Down	0.001816881	0.000827784
Acc30267	3172	1510	106	-2.812995798	Down	7.79E-178	6.98E-177
Acc07001	3359	7002	492	-2.811620259	Down	0	0
Acc13248	680	29.16	2.05	-2.810878323	Down	7.82E-05	4.29E-05
Acc23932	1161	5360	378	-2.806358279	Down	0	0
Acc13085	2091	430.77	30.41	-2.804883477	Down	6.10E-52	1.84E-51
Acc31453	1699	198	14	-2.802585116	Down	8.99E-25	1.47E-24
Acc28580	779	311	22	-2.801922569	Down	6.00E-38	1.39E-37
Acc02677	1103	1224.48	87	-2.795593417	Down	1.09E-143	7.93E-143
Acc19050	748	253	18	-2.793651991	Down	4.25E-31	8.37E-31
Acc21722	919	1335	95	-2.793351836	Down	2.40E-156	1.89E-155
Acc04934	927	1270.42	90.69	-2.788801658	Down	1.24E-148	9.30E-148
Acc11756	2068	84	6	-2.78793834	Down	2.46E-11	2.29E-11
Acc13909	966	84	6	-2.78793834	Down	2.46E-11	2.29E-11
Acc32440	1898	70	5	-2.78793834	Down	1.10E-09	9.26E-10
Acc05591	1004	56	4	-2.78793834	Down	5.02E-08	3.74E-08
Acc07481	1574	28	2	-2.78793834	Down	0.000116168	6.23E-05
Acc22693	1646	28	2	-2.78793834	Down	0.000116168	6.23E-05
Acc12288	1177	28	2	-2.78793834	Down	0.000116168	6.23E-05
Acc08552	3091	466.75	33.43	-2.78401818	Down	1.03E-55	3.31E-55
Acc14160	2581	747.14	53.55	-2.78300354	Down	4.92E-88	2.36E-87
Acc24043	1615	3289	236	-2.781373661	Down	0	0
Acc24356	1540	3665.89	263.23	-2.780351089	Down	0	0
Acc15724	2004	153	11	-2.778539642	Down	2.40E-19	3.27E-19
Acc30285	1048	739.46	53.2	-2.777557376	Down	5.63E-87	2.66E-86
Acc04931	978	1651	119	-2.77489006	Down	1.46E-191	1.40E-190
Acc27797	2483	47075.97	3394.4	-2.774345751	Down	0	0
Acc06791	1242	1223.65	88.36	-2.772237153	Down	2.29E-142	1.65E-141
Acc18765	1047	138.31	9.99	-2.771860399	Down	1.34E-17	1.70E-17
Acc05696	1978	166	12	-2.770660349	Down	8.44E-21	1.22E-20
Acc07798	3065	2755	200	-2.764563832	Down	0	0
Acc31162	1570	19.41	1.41	-2.763616468	Down	0.001401586	0.000650171
Acc30228	1264	2335.84	170	-2.760918223	Down	9.63E-269	1.32E-267
Acc12048	1495	1195	87	-2.760434825	Down	1.79E-138	1.26E-137
Acc15814	1499	137	10	-2.756687406	Down	2.34E-17	2.94E-17
Acc10268	2262	27.26	1.99	-2.756528644	Down	0.000156524	8.25E-05
Acc24038	1018	123	9	-2.753172922	Down	1.01E-15	1.18E-15
Acc25246	634	41	3	-2.753172922	Down	3.60E-06	2.27E-06
Acc18138	1514	750	55	-2.74997049	Down	2.70E-87	1.28E-86
Acc02582	730	6108	448	-2.749712843	Down	0	0
Acc20457	1680	3596	264	-2.748366604	Down	0	0
Acc10215	1972	1929.05	141.71	-2.747460483	Down	3.44E-221	3.78E-220
Acc12539	1019	163	12	-2.744349072	Down	2.89E-20	4.07E-20
Acc13682	2304	380	28	-2.743084104	Down	5.13E-45	1.36E-44
Acc16444	2569	14000	1032	-2.742495369	Down	0	0
Acc17639	1114	1315	97	-2.74151766	Down	4.24E-151	3.23E-150
Acc22342	1123	1380	102	-2.738610628	Down	2.71E-158	2.15E-157
Acc30030	1291	8007	593	-2.735741214	Down	0	0
Acc32146	3695	189	14	-2.73547092	Down	3.60E-23	5.63E-23
Acc11752	1252	54	4	-2.73547092	Down	1.16E-07	8.39E-08
Acc17774	1778	27	2	-2.73547092	Down	0.000178735	9.36E-05
Acc19138	1004	27	2	-2.73547092	Down	0.000178735	9.36E-05
Acc22404	2939	364	27	-2.733490556	Down	4.83E-43	1.24E-42
Acc26062	963	255.84	19	-2.731753938	Down	9.66E-31	1.88E-30
Acc09917	542	511	38	-2.729835385	Down	1.27E-59	4.28E-59
Acc15709	1391	937	70	-2.723205639	Down	1.73E-107	9.82E-107
Acc06145	1929	13434	1004	-2.722641178	Down	0	0
Acc21676	2675	107	8	-2.722050404	Down	1.00E-13	1.06E-13
Acc12223	797	160	12	-2.717549012	Down	9.85E-20	1.36E-19
Acc09494	2565	121.88	9.15	-2.71612927	Down	2.16E-15	2.48E-15
Acc09154	1532	259.27	19.54	-2.710536328	Down	6.87E-31	1.34E-30
Acc33389	1507	53	4	-2.708503873	Down	1.76E-07	1.25E-07
Acc06082	2089	543	41	-2.707839801	Down	1.02E-62	3.57E-62
Acc10747	1371	6328	478	-2.707250494	Down	0	0
Acc25669	1312	245.03	18.51	-2.707165013	Down	3.01E-29	5.65E-29
Acc10168	2372	31.6	2.39	-2.705425453	Down	5.57E-05	3.11E-05
Acc01838	1939	7257.59	550.48	-2.701311922	Down	0	0
Acc24212	1201	145	11	-2.701060889	Down	6.35E-18	8.19E-18
Acc31291	1518	935	71	-2.699658853	Down	2.68E-106	1.51E-105
Acc23983	1655	109.25	8.3	-2.698961551	Down	7.18E-14	7.70E-14
Acc28523	1746	1210	92	-2.697812794	Down	6.96E-137	4.86E-136
Acc13146	5546	194.68	14.85	-2.693153262	Down	1.87E-23	2.96E-23
Acc01571	2690	1427	109	-2.691168713	Down	1.19E-160	9.60E-160
Acc28626	870	503.92	38.54	-2.689349658	Down	6.32E-58	2.09E-57
Acc14391	759	196	15	-2.688402667	Down	1.46E-23	2.32E-23
Acc03139	841	1134	87	-2.684844847	Down	9.19E-128	6.05E-127
Acc01612	735	742	57	-2.68296878	Down	3.30E-84	1.51E-83
Acc32259	1726	65.07	5	-2.682575972	Down	8.54E-09	6.73E-09
Acc09764	1864	169	13	-2.681023136	Down	1.76E-20	2.51E-20
Acc18364	2027	117	9	-2.681023136	Down	1.18E-14	1.32E-14
Acc24505	1465	52	4	-2.681023136	Down	2.67E-07	1.87E-07
Acc18960	1547	39	3	-2.681023136	Down	8.35E-06	5.09E-06
Acc08402	555	39	3	-2.681023136	Down	8.35E-06	5.09E-06
Acc14800	1609	39	3	-2.681023136	Down	8.35E-06	5.09E-06
Acc23010	918	39	3	-2.681023136	Down	8.35E-06	5.09E-06
Acc01915	1139	26	2	-2.681023136	Down	0.000274507	0.000140218
Acc29122	634	26	2	-2.681023136	Down	0.000274507	0.000140218
Acc15035	1961	26	2	-2.681023136	Down	0.000274507	0.000140218
Acc31891	657	83.63	6.44	-2.679471388	Down	6.89E-11	6.25E-11
Acc07134	1848	3908	301	-2.679178493	Down	0	0
Acc31968	2011	832.02	64.21	-2.676331722	Down	6.01E-94	3.06E-93
Acc12376	1548	272	21	-2.675728836	Down	6.64E-32	1.34E-31
Acc32833	1556	47.26	3.65	-2.675234678	Down	9.61E-07	6.40E-07
Acc21311	2772	246	19	-2.67517041	Down	5.23E-29	9.76E-29
Acc08696	1061	116	9	-2.668639412	Down	1.78E-14	1.96E-14
Acc13739	2468	11502.66	896.19	-2.662602504	Down	0	0
Acc03404	942	655.16	51.11	-2.660753199	Down	6.31E-74	2.57E-73
Acc25841	1389	64	5	-2.658655323	Down	1.33E-08	1.03E-08
Acc19924	2363	294.27	23	-2.658018123	Down	3.81E-34	8.10E-34
Acc22043	2288	1410.27	110.3	-2.657050119	Down	1.16E-156	9.17E-156
Acc05331	2128	179	14	-2.657044273	Down	2.09E-21	3.08E-21
Acc09516	2693	51	4	-2.65300876	Down	4.04E-07	2.79E-07
Acc32287	2273	471	37	-2.650713302	Down	1.89E-53	5.83E-53
Acc12008	1361	216	17	-2.648008079	Down	2.08E-25	3.48E-25
Acc22338	3246	8949.01	706	-2.64457142	Down	0	0
Acc22627	1382	95.29	7.52	-2.644103673	Down	4.74E-12	4.60E-12
Acc17520	2082	4864.09	384	-2.643575125	Down	0	0
Acc09721	1645	76	6	-2.643548431	Down	6.69E-10	5.70E-10
Acc28361	1445	38	3	-2.643548431	Down	1.27E-05	7.59E-06
Acc14200	1332	38	3	-2.643548431	Down	1.27E-05	7.59E-06
Acc13809	641	1329	105	-2.64246329	Down	6.95E-147	5.15E-146
Acc09988	1049	164	13	-2.637695704	Down	1.33E-19	1.83E-19
Acc26207	1923	117.84	9.36	-2.634760413	Down	1.68E-14	1.85E-14
Acc11541	3541	67.31	5.35	-2.633793478	Down	6.71E-09	5.32E-09
Acc13810	1451	578	46	-2.631947144	Down	1.08E-64	3.89E-64
Acc09882	4207	226	18	-2.630837379	Down	2.47E-26	4.26E-26
Acc09080	1606	195.92	15.65	-2.626613535	Down	5.23E-23	8.12E-23
Acc15729	1822	1888.23	151	-2.624997469	Down	2.38E-206	2.48E-205
Acc08496	1740	25	2	-2.624439608	Down	0.000420765	0.000209896
Acc27854	1033	25	2	-2.624439608	Down	0.000420765	0.000209896
Acc17324	1119	25	2	-2.624439608	Down	0.000420765	0.000209896
Acc00117	1154	25	2	-2.624439608	Down	0.000420765	0.000209896
Acc23704	2081	1561	125	-2.623053955	Down	8.21E-171	7.10E-170
Acc07664	1074	1708.78	137	-2.621302286	Down	1.18E-186	1.11E-185
Acc15493	1511	87	7	-2.616171992	Down	5.11E-11	4.67E-11
Acc33088	1232	2331.53	187.81	-2.614514624	Down	3.38E-253	4.25E-252
Acc02825	1007	62	5	-2.612851633	Down	3.02E-08	2.28E-08
Acc30530	2245	62	5	-2.612851633	Down	3.02E-08	2.28E-08
Acc27819	1609	37	3	-2.605074283	Down	1.93E-05	1.13E-05
Acc21483	1949	37	3	-2.605074283	Down	1.93E-05	1.13E-05
Acc17621	707	197	16	-2.602635237	Down	6.53E-23	1.01E-22
Acc12185	2133	779.08	63.33	-2.601393913	Down	1.78E-85	8.29E-85
Acc20210	1538	123	10	-2.601169828	Down	6.99E-15	7.87E-15
Acc28224	1740	1625.71	132.32	-2.5995503	Down	4.39E-176	3.90E-175
Acc07018	1957	4042	329	-2.599493251	Down	0	0
Acc27268	3139	400.57	32.66	-2.597041099	Down	9.39E-45	2.48E-44
Acc19150	2544	2010	164	-2.596011199	Down	6.81E-217	7.37E-216
Acc21525	1744	869	71	-2.594048665	Down	7.87E-95	4.04E-94
Acc15090	2594	1019.31	83.29	-2.593889196	Down	6.86E-111	4.02E-110
Acc04900	1219	18229	1492	-2.591499398	Down	0	0
Acc28490	1030	463	38	-2.587524288	Down	2.98E-51	8.87E-51
Acc24925	1966	267.84	22.02	-2.585068477	Down	2.40E-30	4.63E-30
Acc15312	1405	2333.2	192	-2.583715181	Down	3.98E-250	4.97E-249
Acc25522	419	85	7	-2.582619432	Down	1.15E-10	1.03E-10
Acc05096	1332	23.19	1.91	-2.582441695	Down	0.000760741	0.00036619
Acc25500	1696	97	8	-2.58049626	Down	5.87E-12	5.67E-12
Acc28945	1186	5869.9	484.74	-2.578636302	Down	0	0
Acc19360	1354	43.88	3.63	-2.57610549	Down	3.75E-06	2.37E-06
Acc18126	3775	767.91	63.53	-2.576010729	Down	2.17E-83	9.80E-83
Acc21324	616	459	38	-2.575006248	Down	1.46E-50	4.28E-50
Acc33109	1335	338	28	-2.574107932	Down	1.11E-37	2.56E-37
Acc23630	1979	434	36	-2.572209649	Down	7.53E-48	2.10E-47
Acc18956	414	84.24	7	-2.569662027	Down	1.56E-10	1.39E-10
Acc10850	1200	240	20	-2.565545919	Down	3.78E-27	6.70E-27
Acc10928	512	72	6	-2.565545919	Down	3.41E-09	2.77E-09
Acc30436	1208	48	4	-2.565545919	Down	1.39E-06	9.14E-07
Acc13820	1199	36	3	-2.565545919	Down	2.92E-05	1.68E-05
Acc23647	2147	24	2	-2.565545919	Down	0.00064356	0.000312982
Acc03448	1518	24	2	-2.565545919	Down	0.00064356	0.000312982
Acc03261	912	24	2	-2.565545919	Down	0.00064356	0.000312982
Acc26616	1361	24	2	-2.565545919	Down	0.00064356	0.000312982
Acc01568	1606	18096.49	1509.48	-2.56416977	Down	0	0
Acc03084	870	11211	936	-2.562846048	Down	0	0
Acc15853	944	311	26	-2.56091447	Down	1.28E-34	2.75E-34
Acc23462	1817	1182.98	99	-2.559436766	Down	1.60E-126	1.04E-125
Acc31259	559	3261	273	-2.558925003	Down	0	0
Acc15316	719	215	18	-2.558851266	Down	2.00E-24	3.25E-24
Acc21825	1912	120.28	10.08	-2.557412647	Down	2.42E-14	2.65E-14
Acc08854	1163	10188	856	-2.553699676	Down	0	0
Acc20380	722	582	49	-2.550748917	Down	5.58E-63	1.97E-62
Acc17781	1042	178	15	-2.549426253	Down	2.02E-20	2.87E-20
Acc33075	2490	4235	357	-2.548949408	Down	0	0
Acc30427	2657	759	64	-2.548539493	Down	1.72E-81	7.59E-81
Acc30705	4001	284.51	24	-2.547956469	Down	1.21E-31	2.42E-31
Acc08452	1581	766.42	64.83	-2.543985149	Down	4.15E-82	1.84E-81
Acc07983	1417	25.01	2.12	-2.540952306	Down	0.000530299	0.000260883
Acc25591	1915	2258	192	-2.536450688	Down	2.97E-237	3.52E-236
Acc24076	3126	928.04	79	-2.534845849	Down	1.25E-98	6.64E-98
Acc30661	1856	434	37	-2.532681285	Down	4.63E-47	1.28E-46
Acc07019	2181	3167	270	-2.532668973	Down	0	0
Acc17625	649	293	25	-2.531484083	Down	2.57E-32	5.24E-32
Acc23779	1648	10325	881	-2.53143937	Down	0	0
Acc02337	964	11936	1022	-2.526435757	Down	0	0
Acc13641	1579	175	15	-2.524903934	Down	6.66E-20	9.27E-20
Acc11398	1444	35	3	-2.524903934	Down	4.42E-05	2.49E-05
Acc28570	1796	35	3	-2.524903934	Down	4.42E-05	2.49E-05
Acc14249	952	35	3	-2.524903934	Down	4.42E-05	2.49E-05
Acc00266	1448	303	26	-2.523317683	Down	3.02E-33	6.29E-33
Acc06186	1084	174	15	-2.516636318	Down	9.89E-20	1.37E-19
Acc16027	1365	189.03	16.34	-2.512718745	Down	2.90E-21	4.25E-21
Acc31568	1185	52.93	4.58	-2.511249569	Down	5.51E-07	3.76E-07
Acc26728	567	958	83	-2.509425832	Down	1.27E-100	6.84E-100
Acc30418	1643	1187.99	103.22	-2.505311669	Down	4.39E-124	2.82E-123
Acc26893	1470	10748	934	-2.505085284	Down	0	0
Acc21054	884	115	10	-2.504145374	Down	1.72E-13	1.80E-13
Acc24926	1949	92	8	-2.504145374	Down	4.36E-11	4.00E-11
Acc17505	469	46	4	-2.504145374	Down	3.15E-06	2.00E-06
Acc05115	1292	23	2	-2.504145374	Down	0.000981997	0.000465426
Acc25071	888	23	2	-2.504145374	Down	0.000981997	0.000465426
Acc27873	1756	23	2	-2.504145374	Down	0.000981997	0.000465426
Acc13972	1354	23	2	-2.504145374	Down	0.000981997	0.000465426
Acc12076	2106	23	2	-2.504145374	Down	0.000981997	0.000465426
Acc10145	2089	23	2	-2.504145374	Down	0.000981997	0.000465426
Acc03905	2085	474.81	41.29	-2.504069414	Down	1.09E-50	3.21E-50
Acc31880	1043	413.95	36	-2.503971125	Down	2.04E-44	5.36E-44
Acc19455	1269	241	21	-2.501155331	Down	1.55E-26	2.70E-26
Acc04777	1059	5268	460	-2.498132997	Down	0	0
Acc11784	2453	663	58	-2.495467483	Down	8.60E-70	3.33E-69
Acc03832	611	30.39	2.66	-2.494681942	Down	0.000156738	8.26E-05
Acc30695	733	308.02	27	-2.492576135	Down	2.51E-33	5.23E-33
Acc12029	1474	670	59	-2.485957654	Down	3.27E-70	1.27E-69
Acc33445	1882	204.79	18.05	-2.484657945	Down	1.24E-22	1.90E-22
Acc11509	958	102	9	-2.483083759	Down	4.95E-12	4.79E-12
Acc05368	1049	34	3	-2.483083759	Down	6.67E-05	3.69E-05
Acc32809	1172	34	3	-2.483083759	Down	6.67E-05	3.69E-05
Acc03757	1542	1262.28	111.44	-2.482276315	Down	2.30E-130	1.54E-129
Acc30004	2499	2571	227	-2.482148826	Down	2.24E-263	2.99E-262
Acc01380	997	770	68	-2.481835212	Down	2.91E-80	1.27E-79
Acc16468	1521	317	28	-2.481567526	Down	4.37E-34	9.27E-34
Acc22983	1624	1232.01	109	-2.479197344	Down	4.14E-127	2.70E-126
Acc21125	945	473	42	-2.473962369	Down	7.76E-50	2.25E-49
Acc26639	1171	45	4	-2.472436514	Down	4.73E-06	2.95E-06
Acc11221	3470	62.45	5.56	-2.470128202	Down	7.11E-08	5.24E-08
Acc19946	1849	438	39	-2.469968259	Down	3.38E-46	9.18E-46
Acc26216	1204	1829	163	-2.468694624	Down	8.02E-187	7.54E-186
Acc11643	2404	1567	140	-2.465089866	Down	4.33E-160	3.49E-159
Acc06997	1008	503	45	-2.463144911	Down	1.25E-52	3.82E-52
Acc04977	889	27587	2469	-2.462573253	Down	0	0
Acc30814	2860	776.78	69.57	-2.461552248	Down	3.25E-80	1.41E-79
Acc16959	969	9273	831	-2.460699191	Down	0	0
Acc02815	2336	167	15	-2.457397115	Down	1.56E-18	2.05E-18
Acc19682	1196	345	31	-2.456839659	Down	1.52E-36	3.41E-36
Acc14065	717	2231	201	-2.453006525	Down	8.79E-226	9.83E-225
Acc08886	1652	344	31	-2.452651862	Down	2.24E-36	5.01E-36
Acc25916	1066	1097	99	-2.450574608	Down	6.34E-112	3.74E-111
Acc17586	1909	144	13	-2.450068701	Down	3.82E-16	4.54E-16
Acc01377	974	16050	1450	-2.44903191	Down	0	0
Acc25046	2800	331	30	-2.444380229	Down	6.17E-35	1.33E-34
Acc11414	3408	4941	448	-2.443815836	Down	0	0
Acc01314	548	1433	130	-2.443038499	Down	4.35E-145	3.19E-144
Acc23984	1837	106.96	9.71	-2.442039683	Down	2.46E-12	2.43E-12
Acc24190	1602	605	55	-2.440015037	Down	2.84E-62	9.90E-62
Acc11656	1331	77	7	-2.440015037	Down	2.83E-09	2.31E-09
Acc18902	3632	44	4	-2.440015037	Down	7.08E-06	4.35E-06
Acc15540	2501	33	3	-2.440015037	Down	0.00010046	5.44E-05
Acc07881	1436	22	2	-2.440015037	Down	0.001494519	0.000690263
Acc32131	1181	22	2	-2.440015037	Down	0.001494519	0.000690263
Acc03774	1076	22	2	-2.440015037	Down	0.001494519	0.000690263
Acc19416	1590	22	2	-2.440015037	Down	0.001494519	0.000690263
Acc11485	2429	185.31	16.86	-2.438847713	Down	3.13E-20	4.41E-20
Acc15966	2337	384	35	-2.436262902	Down	4.16E-40	1.01E-39
Acc05093	1770	188.22	17.16	-2.435881895	Down	1.70E-20	2.41E-20
Acc25662	1310	48.43	4.44	-2.427852839	Down	2.62E-06	1.68E-06
Acc06497	4151	98	9	-2.425368261	Down	2.40E-11	2.24E-11
Acc19438	676	228	21	-2.421156009	Down	2.49E-24	4.04E-24
Acc19897	826	76	7	-2.421156009	Down	4.20E-09	3.39E-09
Acc31613	1969	293	27	-2.42045277	Down	8.72E-31	1.70E-30
Acc17672	1287	58.56	5.4	-2.419467659	Down	2.52E-07	1.77E-07
Acc28154	1055	2765	255	-2.419293746	Down	6.46E-275	9.03E-274
Acc23303	1710	1656	153	-2.416682533	Down	2.75E-165	2.29E-164
Acc04910	3155	580.12	53.86	-2.409648641	Down	5.96E-59	2.00E-58
Acc23441	1207	7385	686	-2.408900857	Down	0	0
Acc11385	903	63.03	5.86	-2.407649511	Down	9.61E-08	7.00E-08
Acc31058	760	129	12	-2.406848173	Down	2.36E-14	2.59E-14
Acc00038	1444	129	12	-2.406848173	Down	2.36E-14	2.59E-14
Acc26950	766	42.98	4	-2.406176996	Down	1.07E-05	6.43E-06
Acc01007	2414	216.66	20.2	-2.403589046	Down	5.11E-23	7.95E-23
Acc00106	2755	85.74	8	-2.40247993	Down	5.19E-10	4.46E-10
Acc11616	1496	300.01	28	-2.402095275	Down	3.21E-31	6.36E-31
Acc25699	1815	235.57	21.99	-2.401819731	Down	7.26E-25	1.19E-24
Acc26413	1678	217.34	20.31	-2.400274991	Down	4.74E-23	7.38E-23
Acc33237	1585	1746	163.41	-2.398068799	Down	1.29E-172	1.13E-171
Acc16704	598	395	37	-2.396838895	Down	1.83E-40	4.43E-40
Acc28661	2108	629	59	-2.394856576	Down	2.54E-63	9.01E-63
Acc06218	2638	1317.91	123.64	-2.394617806	Down	1.43E-130	9.61E-130
Acc31680	1753	1562.57	146.95	-2.391106975	Down	3.55E-154	2.75E-153
Acc06113	2565	2573	242	-2.390955922	Down	1.64E-252	2.07E-251
Acc33624	1731	499	47	-2.388890572	Down	1.82E-50	5.33E-50
Acc21688	1057	88.44	8.37	-2.381982915	Down	3.41E-10	2.96E-10
Acc08006	2226	190.99	18.09	-2.380816207	Down	2.86E-20	4.03E-20
Acc22013	2055	137.76	13.05	-2.380618754	Down	4.74E-15	5.37E-15
Acc07208	1928	3314.41	314.03	-2.380361201	Down	0	0
Acc33684	1334	203.86	19.33	-2.379248603	Down	1.63E-21	2.41E-21
Acc26007	1204	1090.98	103.64	-2.376555246	Down	1.74E-107	9.88E-107
Acc04320	3347	5394.79	512.87	-2.37548513	Down	0	0
Acc24477	1550	168	16	-2.372900841	Down	5.91E-18	7.63E-18
Acc19858	3691	42	4	-2.372900841	Down	1.58E-05	9.36E-06
Acc27611	2858	42	4	-2.372900841	Down	1.58E-05	9.36E-06
Acc20182	1157	42	4	-2.372900841	Down	1.58E-05	9.36E-06
Acc21958	1227	591.14	56.3	-2.372876436	Down	5.36E-59	1.80E-58
Acc13950	2036	1815.02	173	-2.371724921	Down	4.50E-177	4.02E-176
Acc15148	1830	12533	1195	-2.371232686	Down	0	0
Acc11645	843	4748	454	-2.36713915	Down	0	0
Acc00029	2139	491.03	47	-2.365661926	Down	3.85E-49	1.10E-48
Acc18886	2597	7917	758	-2.365267516	Down	0	0
Acc08188	2331	287.03	27.5	-2.364281428	Down	2.03E-29	3.83E-29
Acc29397	3210	634.81	60.83	-2.364053363	Down	5.95E-63	2.10E-62
Acc01018	1705	1749.15	167.65	-2.363713044	Down	4.75E-170	4.07E-169
Acc23995	706	73	7	-2.363053055	Down	1.37E-08	1.06E-08
Acc00960	1340	198	19	-2.362012525	Down	8.92E-21	1.28E-20
Acc19462	601	100.66	9.67	-2.360414221	Down	2.69E-11	2.50E-11
Acc01019	1658	1434.35	137.8	-2.360332728	Down	1.41E-139	9.99E-139
Acc03403	937	1705.79	163.91	-2.360047685	Down	1.38E-165	1.16E-164
Acc20541	1303	161.25	15.5	-2.359542458	Down	3.43E-17	4.28E-17
Acc03348	2029	1318.8	127	-2.356908808	Down	2.81E-128	1.86E-127
Acc09474	1592	2594	250	-2.355761898	Down	3.48E-250	4.34E-249
Acc31136	1764	720.48	69.45	-2.355495201	Down	6.68E-71	2.63E-70
Acc15602	1023	50.6	4.88	-2.35476775	Down	2.39E-06	1.54E-06
Acc05367	975	1744.22	168.25	-2.354487028	Down	8.38E-169	7.11E-168
Acc07060	1131	1376	133	-2.351565737	Down	2.11E-133	1.44E-132
Acc31949	1600	1603.41	155.01	-2.3512936	Down	4.28E-155	3.35E-154
Acc13851	824	248	24	-2.349817228	Down	1.81E-25	3.04E-25
Acc31561	1276	93	9	-2.349817228	Down	1.69E-10	1.50E-10
Acc29076	683	62	6	-2.349817228	Down	1.84E-07	1.31E-07
Acc11944	715	31	3	-2.349817228	Down	0.000226371	0.000116982
Acc31520	431	31	3	-2.349817228	Down	0.000226371	0.000116982
Acc32278	687	31	3	-2.349817228	Down	0.000226371	0.000116982
Acc18906	928	31	3	-2.349817228	Down	0.000226371	0.000116982
Acc21157	2190	31	3	-2.349817228	Down	0.000226371	0.000116982
Acc16571	1201	31	3	-2.349817228	Down	0.000226371	0.000116982
Acc14004	1056	3740	362	-2.349560086	Down	0	0
Acc22556	1928	258	25	-2.347954484	Down	2.08E-26	3.61E-26
Acc23506	676	157.29	15.27	-2.345238402	Down	1.07E-16	1.30E-16
Acc23213	1651	51.44	5	-2.343474061	Down	2.11E-06	1.36E-06
Acc32202	855	461	45	-2.337353262	Down	1.30E-45	3.48E-45
Acc02254	1954	1065	104	-2.336781415	Down	6.17E-103	3.38E-102
Acc03953	1311	877.87	85.81	-2.335373042	Down	3.97E-85	1.84E-84
Acc04535	1350	819.65	80.18	-2.334277089	Down	1.45E-79	6.27E-79
Acc13828	1897	50.37	4.93	-2.333488597	Down	2.85E-06	1.82E-06
Acc06840	1742	449.98	44.12	-2.330939602	Down	2.00E-44	5.25E-44
Acc13060	1017	1782	175	-2.328653928	Down	3.39E-170	2.91E-169
Acc10599	2143	261.11	25.65	-2.328210398	Down	1.87E-26	3.24E-26
Acc32943	585	1537	151	-2.328080128	Down	4.93E-147	3.66E-146
Acc22928	1001	1792.14	176.29	-2.326244216	Down	6.06E-171	5.24E-170
Acc33628	1417	176.6	17.39	-2.324738923	Down	2.22E-18	2.91E-18
Acc16207	920	2141	211	-2.32355331	Down	1.54E-203	1.58E-202
Acc06916	2067	1085	107	-2.322595759	Down	4.35E-104	2.40E-103
Acc27875	1286	2057	203	-2.321573579	Down	1.94E-195	1.90E-194
Acc19625	1214	312.6	30.86	-2.321091229	Down	3.09E-31	6.12E-31
Acc32592	1109	5781	571	-2.32033984	Down	0	0
Acc23345	2058	1012	100	-2.319720803	Down	4.49E-97	2.35E-96
Acc33617	788	79.94	7.9	-2.319576432	Down	4.20E-09	3.39E-09
Acc19114	2894	566.21	56	-2.318421915	Down	4.26E-55	1.35E-54
Acc00662	1663	3173	314	-2.317594475	Down	1.05E-299	1.58E-298
Acc02661	1108	293	29	-2.317359277	Down	2.49E-29	4.70E-29
Acc17247	1494	6652	659	-2.316021216	Down	0	0
Acc11111	3022	5943.46	589.97	-2.313172962	Down	0	0
Acc24433	4387	151	15	-2.312097562	Down	7.60E-16	8.90E-16
Acc05558	1635	3895	387	-2.311801275	Down	0	0
Acc32244	1054	181	18	-2.310504304	Down	1.13E-18	1.50E-18
Acc10537	2022	1621	162	-2.303401791	Down	5.09E-153	3.92E-152
Acc09253	923	90	9	-2.302511513	Down	5.39E-10	4.62E-10
Acc10335	2065	30	3	-2.302511513	Down	0.000338538	0.000170908
Acc03426	2687	30	3	-2.302511513	Down	0.000338538	0.000170908
Acc27578	1738	24.95	2.5	-2.299623234	Down	0.001091269	0.000514363
Acc02659	948	209	21	-2.295625127	Down	3.64E-21	5.31E-21
Acc04577	1670	661	66.43	-2.29532687	Down	2.84E-63	1.00E-62
Acc07820	1144	636	64	-2.293466373	Down	6.84E-61	2.34E-60
Acc18957	453	192.75	19.41	-2.292442255	Down	1.30E-19	1.79E-19
Acc23216	1043	784	79	-2.291512514	Down	1.48E-74	6.06E-74
Acc31189	1086	35.42	3.57	-2.291151651	Down	0.000103344	5.58E-05
Acc23340	4329	284.01	28.63	-2.290925571	Down	4.10E-28	7.49E-28
Acc32816	1291	5942	599	-2.290904115	Down	0	0
Acc09678	2021	119.03	12	-2.290802339	Down	1.10E-12	1.11E-12
Acc23208	2119	375.53	37.97	-2.286579679	Down	1.50E-36	3.36E-36
Acc22376	1068	178	18	-2.286391848	Down	3.53E-18	4.60E-18
Acc14196	1032	1077	109	-2.285201628	Down	2.24E-101	1.21E-100
Acc24693	1442	35.16	3.56	-2.284569342	Down	0.000112639	6.06E-05
Acc03407	1048	39833	4034	-2.284264568	Down	0	0
Acc29112	1172	83	8.42	-2.281802616	Down	3.05E-09	2.49E-09
Acc05846	1815	69	7	-2.281752953	Down	6.46E-08	4.77E-08
Acc33748	383	134.78	13.68	-2.281049714	Down	4.23E-14	4.59E-14
Acc02757	582	266	27	-2.280978351	Down	2.64E-26	4.55E-26
Acc28014	2634	49.23	5	-2.280121158	Down	5.02E-06	3.12E-06
Acc05425	2559	6468	657	-2.279937821	Down	0	0
Acc30624	1132	2274	231	-2.279850915	Down	3.19E-211	3.37E-210
Acc13843	959	374	38	-2.279550364	Down	2.80E-36	6.24E-36
Acc29559	2075	59	6	-2.278263967	Down	5.92E-07	4.02E-07
Acc21770	1220	29.58	3.01	-2.277370078	Down	0.000407456	0.000203822
Acc05364	1555	18517.96	1888	-2.274577923	Down	0	0
Acc01403	959	5410.52	552	-2.273610503	Down	0	0
Acc17466	1924	578	59	-2.272866051	Down	6.38E-55	2.02E-54
Acc15739	1103	78	8	-2.265985637	Down	1.04E-08	8.19E-09
Acc23534	1308	39	4	-2.265985637	Down	5.19E-05	2.91E-05
Acc24357	1696	4260.06	437.29	-2.264794906	Down	0	0
Acc10884	2816	49.17	5.06	-2.261152483	Down	5.67E-06	3.51E-06
Acc09685	2126	12575.02	1297	-2.257893728	Down	0	0
Acc05638	1590	126	13	-2.257423623	Down	3.95E-13	4.06E-13
Acc20045	490	484	50	-2.255590465	Down	7.20E-46	1.94E-45
Acc05947	1411	6247.94	645.75	-2.254916374	Down	0	0
Acc23562	627	58	6	-2.253601912	Down	8.71E-07	5.83E-07
Acc12540	899	29	3	-2.253601912	Down	0.000504906	0.000249059
Acc18252	996	97.14	10.05	-2.253453403	Down	1.95E-10	1.72E-10
Acc00576	1885	619.51	64.11	-2.253089674	Down	3.91E-58	1.30E-57
Acc25962	2993	405	42	-2.250044093	Down	1.48E-38	3.46E-38
Acc12242	601	723	75	-2.249616564	Down	2.04E-67	7.66E-67
Acc22158	2032	28.63	2.97	-2.249576252	Down	0.000556211	0.000272925
Acc25832	1148	106	11	-2.249072254	Down	3.10E-11	2.88E-11
Acc07404	1836	5623	584	-2.247883191	Down	0	0
Acc01201	1510	625	65	-2.245927985	Down	2.06E-58	6.84E-58
Acc15628	2011	230.63	24	-2.245057296	Down	1.29E-22	1.99E-22
Acc17928	1610	1004	105	-2.237881454	Down	2.63E-92	1.32E-91
Acc15336	1037	296	31	-2.235840473	Down	2.00E-28	3.67E-28
Acc11544	3354	1820.36	190.84	-2.234371712	Down	1.93E-165	1.61E-164
Acc20336	1832	9340.48	980.26	-2.232843749	Down	0	0
Acc09149	3042	404.45	42.56	-2.228974723	Down	4.38E-38	1.02E-37
Acc29665	2348	586.67	62.01	-2.222559844	Down	2.89E-54	9.05E-54
Acc25361	1722	1814.04	192	-2.22061147	Down	1.21E-163	9.95E-163
Acc04302	1573	170	18	-2.220049353	Down	7.17E-17	8.82E-17
Acc13857	841	2038	216	-2.218634252	Down	2.15E-183	1.98E-182
Acc13002	2213	679	72	-2.217926181	Down	2.31E-62	8.05E-62
Acc32998	964	528	56	-2.217622615	Down	6.89E-49	1.96E-48
Acc06406	1762	66	7	-2.217622615	Down	2.04E-07	1.44E-07
Acc16175	716	1630.87	172.99	-2.217464657	Down	4.52E-147	3.36E-146
Acc05245	5926	509	54	-2.217217762	Down	3.50E-47	9.67E-47
Acc04892	775	1826	194	-2.215141626	Down	3.24E-164	2.68E-163
Acc31160	2370	574	61	-2.214753007	Down	6.55E-53	2.01E-52
Acc09895	1990	47	5	-2.213244175	Down	1.19E-05	7.14E-06
Acc17359	2573	3712	395	-2.21285557	Down	0	0
Acc27366	1765	6481	690	-2.212131585	Down	0	0
Acc12815	900	1145	122	-2.210977963	Down	1.77E-103	9.77E-103
Acc02660	937	750	80	-2.209402108	Down	2.24E-68	8.53E-68
Acc01822	1179	150	16	-2.209402108	Down	5.51E-15	6.22E-15
Acc09787	986	1340	143	-2.208729367	Down	1.28E-120	8.01E-120
Acc11685	1363	1039	111	-2.207147491	Down	7.01E-94	3.56E-93
Acc22079	1903	161.81	17.32	-2.204373353	Down	5.27E-16	6.21E-16
Acc03841	1571	28	3	-2.202975839	Down	0.000750841	0.000361615
Acc25139	2736	28	3	-2.202975839	Down	0.000750841	0.000361615
Acc28811	1801	28	3	-2.202975839	Down	0.000750841	0.000361615
Acc13598	1977	18656	2000	-2.202151207	Down	0	0
Acc16722	1155	12908	1384	-2.201933053	Down	0	0
Acc02053	1070	93	10	-2.197814134	Down	8.60E-10	7.28E-10
Acc10643	709	93	10	-2.197814134	Down	8.60E-10	7.28E-10
Acc22550	1322	130	14	-2.195596309	Down	4.26E-13	4.37E-13
Acc06778	1145	167	18	-2.194362709	Down	2.19E-16	2.64E-16
Acc07557	655	593	64	-2.192471713	Down	6.03E-54	1.88E-53
Acc07000	361	2418	261	-2.192275951	Down	4.78E-214	5.12E-213
Acc19904	2127	823	89	-2.189598607	Down	4.85E-74	1.98E-73
Acc23088	1200	2088.57	226	-2.188704238	Down	8.46E-185	7.85E-184
Acc18536	681	1155	125	-2.18847627	Down	4.47E-103	2.45E-102
Acc25018	3009	169.3	18.34	-2.187099847	Down	1.58E-16	1.91E-16
Acc06697	1984	406	44.06	-2.184521745	Down	2.51E-37	5.72E-37
Acc08228	4671	15087.09	1638	-2.183890721	Down	0	0
Acc22773	3480	267.54	29.06	-2.183231415	Down	3.77E-25	6.26E-25
Acc23685	749	405	44	-2.182929897	Down	3.30E-37	7.52E-37
Acc28621	799	36.29	3.95	-2.180230916	Down	0.000137672	7.31E-05
Acc19967	2130	983	107	-2.180164038	Down	1.32E-87	6.28E-87
Acc28961	541	151.56	16.52	-2.178186871	Down	6.90E-15	7.77E-15
Acc25231	1721	138	15.06	-2.17645801	Down	1.12E-13	1.18E-13
Acc00946	697	64	7	-2.173228496	Down	4.36E-07	3.00E-07
Acc09100	1986	905	99	-2.17300078	Down	1.75E-80	7.65E-80
Acc19301	5771	521	57	-2.172832966	Down	4.20E-47	1.16E-46
Acc05191	1916	932	102	-2.172344221	Down	8.49E-83	3.82E-82
Acc13969	1047	209	22.96	-2.166891813	Down	7.94E-20	1.10E-19
Acc17393	1204	191	21	-2.165694823	Down	3.05E-18	3.98E-18
Acc29251	1598	2980	328	-2.164128029	Down	3.90E-259	5.10E-258
Acc01218	701	754	83	-2.1639647	Down	5.02E-67	1.87E-66
Acc03590	1331	1743	192	-2.162977771	Down	2.48E-152	1.91E-151
Acc29134	1999	163.45	18.01	-2.162562709	Down	8.29E-16	9.70E-16
Acc17938	863	157.09	17.33	-2.160831203	Down	3.08E-15	3.52E-15
Acc06076	1419	145	16	-2.160492508	Down	3.53E-14	3.83E-14
Acc20367	2150	9880	1092	-2.158121604	Down	0	0
Acc23713	1214	6287	695	-2.157870298	Down	0	0
Acc26525	2399	208	23	-2.15746118	Down	1.22E-19	1.68E-19
Acc22616	1858	11678	1293	-2.155582454	Down	0	0
Acc22262	780	72	8	-2.150508419	Down	1.02E-07	7.38E-08
Acc03782	934	54	6	-2.150508419	Down	4.01E-06	2.53E-06
Acc00174	2777	27	3	-2.150508419	Down	0.001113094	0.000523793
Acc27078	689	27	3	-2.150508419	Down	0.001113094	0.000523793
Acc25760	1655	27	3	-2.150508419	Down	0.001113094	0.000523793
Acc12853	1913	1314.53	146.18	-2.149312641	Down	1.77E-114	1.06E-113
Acc12599	2217	375.79	42	-2.142048861	Down	7.06E-34	1.49E-33
Acc27040	395	170	19	-2.142046841	Down	3.33E-16	3.98E-16
Acc21163	1215	313	35	-2.141319248	Down	1.74E-28	3.21E-28
Acc08971	2734	380	42.51	-2.140708672	Down	3.27E-34	6.94E-34
Acc31513	754	143	16	-2.140454755	Down	7.38E-14	7.89E-14
Acc16121	958	27.88	3.12	-2.140196045	Down	0.000956645	0.000454136
Acc19634	1850	250	28	-2.139012781	Down	4.73E-23	7.36E-23
Acc27008	1050	1366	153	-2.138937344	Down	3.56E-118	2.19E-117
Acc01379	901	7820	876	-2.138749251	Down	0	0
Acc26760	1275	27.02	3.03	-2.137221394	Down	0.001158972	0.000543706
Acc28515	728	1711	192	-2.136244962	Down	2.75E-147	2.05E-146
Acc19355	922	98	11	-2.135861643	Down	6.22E-10	5.31E-10
Acc22979	1596	1058	119	-2.132889567	Down	1.20E-91	5.98E-91
Acc14691	1159	57.92	6.52	-2.131701151	Down	2.05E-06	1.32E-06
Acc15488	2502	275	31	-2.129674916	Down	4.58E-25	7.59E-25
Acc31201	673	3216	363	-2.127809371	Down	1.18E-273	1.64E-272
Acc14911	1761	26090	2945	-2.127740823	Down	0	0
Acc20388	618	345	39	-2.125633751	Down	5.91E-31	1.16E-30
Acc04519	831	115	13	-2.125633751	Down	2.40E-11	2.24E-11
Acc31197	1247	1872	212	-2.123027683	Down	1.03E-159	8.24E-159
Acc18319	1492	4232	480	-2.120816735	Down	0	0
Acc04880	910	135.27	15.36	-2.119175213	Down	4.82E-13	4.94E-13
Acc14938	3474	88	10	-2.118086942	Down	5.55E-09	4.43E-09
Acc10231	837	711	81	-2.114439165	Down	1.53E-61	5.26E-61
Acc09663	1463	181.61	20.71	-2.113027603	Down	6.15E-17	7.58E-17
Acc06906	1606	4575.86	522.01	-2.112476982	Down	0	0
Acc25053	1916	184	21	-2.111827951	Down	3.96E-17	4.93E-17
Acc17486	2043	35	4	-2.109866435	Down	0.000244878	0.000125931
Acc17817	1314	83.73	9.57	-2.109737213	Down	1.41E-08	1.09E-08
Acc03672	986	726	83	-2.109369725	Down	1.29E-62	4.50E-62
Acc19750	1960	3309	379	-2.106708956	Down	5.31E-278	7.58E-277
Acc17521	3874	192	22	-2.1061143	Down	9.46E-18	1.21E-17
Acc12747	498	741	85	-2.104522214	Down	1.08E-63	3.85E-63
Acc10391	712	305	35	-2.103965834	Down	3.18E-27	5.64E-27
Acc16319	2115	61	7	-2.103965834	Down	1.34E-06	8.83E-07
Acc08237	827	209	24	-2.102980049	Down	3.77E-19	5.09E-19
Acc22224	1426	52.24	6	-2.102703909	Down	7.78E-06	4.76E-06
Acc12947	2985	2645	304	-2.101707912	Down	5.59E-222	6.16E-221
Acc26390	963	113	13	-2.100322662	Down	5.00E-11	4.56E-11
Acc28684	1493	338	39	-2.096060635	Down	7.43E-30	1.42E-29
Acc09059	1391	26	3	-2.096060635	Down	0.001644617	0.000754094
Acc24206	969	26	3	-2.096060635	Down	0.001644617	0.000754094
Acc26617	827	26	3	-2.096060635	Down	0.001644617	0.000754094
Acc15471	1203	26	3	-2.096060635	Down	0.001644617	0.000754094
Acc00842	2419	17345	2005	-2.093429117	Down	0	0
Acc15669	1734	55.52	6.42	-2.092945783	Down	4.31E-06	2.70E-06
Acc30840	7737.99	2391.09	276.54	-2.092691773	Down	8.72E-200	8.68E-199
Acc02419	2581	190	22	-2.091007408	Down	1.95E-17	2.46E-17
Acc02525	1375	716	83	-2.089359764	Down	4.67E-61	1.60E-60
Acc09964	1164	207	24	-2.089107875	Down	7.77E-19	1.04E-18
Acc25717	1341	207	24	-2.089107875	Down	7.77E-19	1.04E-18
Acc17917	681	250	29	-2.088386708	Down	2.07E-22	3.15E-22
Acc02902	1668	73.62	8.54	-2.088373193	Down	1.26E-07	9.08E-08
Acc21425	1430	105.84	12.28	-2.088085919	Down	2.36E-10	2.07E-10
Acc04669	1303	155	18	-2.086782822	Down	1.80E-14	1.98E-14
Acc03801	976	549.66	63.86	-2.086138455	Down	3.35E-47	9.28E-47
Acc31608	1000	75.86	8.82	-2.085072229	Down	8.37E-08	6.13E-08
Acc09047	1391	43	5	-2.084920078	Down	5.47E-05	3.06E-05
Acc11595	600	3672	427	-2.084841502	Down	3.21E-304	4.91E-303
Acc24017	3780	1111.14	129.42	-2.082491534	Down	2.46E-93	1.24E-92
Acc30037	1172	4936	575	-2.082291951	Down	0	0
Acc19181	784	832.67	97.06	-2.081379499	Down	2.27E-70	8.85E-70
Acc30102	1663	60	7	-2.080119092	Down	1.95E-06	1.26E-06
Acc28120	1006	754	88	-2.079572513	Down	7.92E-64	2.82E-63
Acc15760	854	162.63	19	-2.078105507	Down	4.89E-15	5.54E-15
Acc28607	2138	286.12	33.43	-2.077988505	Down	2.90E-25	4.84E-25
Acc04756	1169	8678	1015	-2.076466277	Down	0	0
Acc16645	1082	1402	164	-2.076302047	Down	8.05E-117	4.90E-116
Acc07927	1157	359	42	-2.076106029	Down	3.04E-31	6.03E-31
Acc24570	812	1487	174	-2.075828854	Down	9.52E-124	6.09E-123
Acc02824	858	94	11	-2.075740651	Down	2.71E-09	2.22E-09
Acc30498	1264	3696	433	-2.074109245	Down	3.42E-304	5.21E-303
Acc21430	3458	1185	139	-2.072313689	Down	8.39E-99	4.46E-98
Acc02877	1054	34	4	-2.068046259	Down	0.000358476	0.00018035
Acc22637	888	34	4	-2.068046259	Down	0.000358476	0.00018035
Acc20026	1866	3539	417	-2.065805891	Down	7.03E-290	1.03E-288
Acc17301	1725	297	35	-2.065619522	Down	5.64E-26	9.63E-26
Acc04695	1029	161	19	-2.063572783	Down	8.81E-15	9.86E-15
Acc00123	804	144	17	-2.063045578	Down	2.24E-13	2.34E-13
Acc29237	2606	314.73	37.18	-2.062099445	Down	2.27E-27	4.05E-27
Acc17327	2349	1202	142	-2.062057479	Down	1.44E-99	7.70E-99
Acc04327	1473	330	39	-2.061503413	Down	1.31E-28	2.43E-28
Acc17606	2325	2512.98	296.99	-2.061496348	Down	6.60E-206	6.85E-205
Acc19160	2385	3761	445	-2.059822483	Down	8.64E-307	1.33E-305
Acc05543	1204	507	60	-2.059534759	Down	5.45E-43	1.39E-42
Acc08328	1529	76	9	-2.05858593	Down	1.04E-07	7.53E-08
Acc14050	1942	4171.83	494.61	-2.056900474	Down	0	0
Acc31006	2341	93.45	11.08	-2.056820201	Down	3.72E-09	3.02E-09
Acc02341	1468	548	65	-2.056247688	Down	3.11E-46	8.47E-46
Acc25403	2376	2114.82	250.95	-2.055646442	Down	5.51E-173	4.82E-172
Acc30034	1436	178.97	21.24	-2.055445522	Down	3.46E-16	4.12E-16
Acc01322	961	29.89	3.55	-2.054355385	Down	0.000862261	0.00041193
Acc25696	1018	1860	221	-2.053767765	Down	3.28E-152	2.51E-151
Acc10920	2796	283.76	33.73	-2.05315043	Down	1.04E-24	1.70E-24
Acc12878	3717	1401.55	166.93	-2.050291473	Down	6.13E-115	3.68E-114
Acc23528	1527	235	28	-2.049745443	Down	1.07E-20	1.53E-20
Acc14102	1784	74.97	8.94	-2.048550084	Down	1.38E-07	9.93E-08
Acc16293	2240	67	8	-2.046672608	Down	6.47E-07	4.39E-07
Acc04224	1948	2050.64	245	-2.045804005	Down	8.93E-167	7.52E-166
Acc23849	1698	184	22	-2.044713755	Down	1.69E-16	2.05E-16
Acc10283	797	92	11	-2.044713755	Down	5.61E-09	4.48E-09
Acc09878	1949	761	91	-2.044541421	Down	4.73E-63	1.67E-62
Acc10274	3600	9786.95	1170.89	-2.0438372	Down	0	0
Acc20259	1000	50969	6103	-2.042612971	Down	0	0
Acc24341	3091	200.46	24.01	-2.042190498	Down	8.26E-18	1.06E-17
Acc20125	639	242	29	-2.04146566	Down	3.64E-21	5.31E-21
Acc13799	1403	50	6	-2.039477107	Down	1.79E-05	1.05E-05
Acc18774	1839	1558	187	-2.039168476	Down	1.14E-126	7.43E-126
Acc01100	1014	158	19	-2.036436653	Down	2.59E-14	2.83E-14
Acc18108	1627	83.98	10.1	-2.036273913	Down	2.80E-08	2.13E-08
Acc33660	3409	319.32	38.42	-2.03565691	Down	2.58E-27	4.59E-27
Acc22526	2585	87.41	10.53	-2.03387632	Down	1.50E-08	1.16E-08
Acc25934	2661	6000	723	-2.033478366	Down	0	0
Acc23256	685	986	119	-2.031209491	Down	1.78E-80	7.77E-80
Acc30332	3837	685.63	82.77	-2.030833792	Down	1.65E-56	5.33E-56
Acc06084	879	215	26	-2.028336549	Down	7.79E-19	1.04E-18
Acc19284	1555	170.27	20.6	-2.027691443	Down	3.13E-15	3.57E-15
Acc13196	1029	694	84	-2.027057848	Down	4.81E-57	1.57E-56
Acc26727	619	1759	213	-2.026413565	Down	1.30E-141	9.27E-141
Acc09870	1958	1560	189	-2.025671308	Down	9.25E-126	5.99E-125
Acc05715	2041	956.5	115.93	-2.025094436	Down	7.94E-78	3.37E-77
Acc31647	2776	66	8	-2.024977537	Down	9.33E-07	6.23E-07
Acc03721	1956	3456	419	-2.024664486	Down	6.29E-276	8.87E-275
Acc09951	541	181	22	-2.020997686	Down	4.94E-16	5.84E-16
Acc10737	2693	1211.75	147.36	-2.020258629	Down	8.66E-98	4.56E-97
Acc30593	1301	74	9	-2.020111782	Down	2.15E-07	1.52E-07
Acc12207	897	271	33	-2.01833834	Down	3.45E-23	5.40E-23
Acc20579	2270	599.01	73	-2.017195137	Down	3.51E-49	1.00E-48
Acc13602	853	2928	357	-2.016502992	Down	6.96E-233	8.07E-232
Acc29606	996	41	5	-2.016207328	Down	0.000115565	6.20E-05
Acc31096	2261	175.72	21.46	-2.014139841	Down	1.51E-15	1.75E-15
Acc15545	1563	270	33	-2.013004896	Down	4.92E-23	7.65E-23
Acc23560	609	49	6	-2.010330761	Down	2.59E-05	1.50E-05
Acc28873	1399	1101	135	-2.008366575	Down	2.33E-88	1.12E-87
Acc17388	1326	2155	265	-2.004207023	Down	1.33E-170	1.14E-169
Acc08338	1903	1641	202	-2.002731459	Down	2.86E-130	1.91E-129
Acc26423	861	146	18	-2.000482975	Down	4.55E-13	4.66E-13
Acc19994	1160	89	11	-1.99688523	Down	1.65E-08	1.28E-08
Acc32869	1187	142.15	17.58	-1.995990541	Down	9.92E-13	9.99E-13
Acc25524	1124	33917	4195	-1.99584927	Down	0	0
Acc01158	458	768	95	-1.99569031	Down	1.06E-61	3.65E-61
Acc33263	2867	97	12	-1.995533759	Down	3.85E-09	3.12E-09
Acc32057	4101	743.9	92.03	-1.995515982	Down	8.11E-60	2.75E-59
Acc27203	1128	299	37	-1.995131727	Down	4.63E-25	7.67E-25
Acc14463	1059	6779	840	-1.993194656	Down	0	0
Acc21457	1839	212.54	26.35	-1.992442933	Down	3.03E-18	3.96E-18
Acc31498	853	62.7	7.78	-1.991206801	Down	2.26E-06	1.45E-06
Acc12019	1877	1152	143	-1.990637083	Down	2.54E-91	1.26E-90
Acc23275	1552	571	71	-1.988183234	Down	4.07E-46	1.10E-45
Acc29461	4605	817.34	101.64	-1.988051478	Down	3.14E-65	1.14E-64
Acc16286	1986	1519.78	189.09	-1.987300942	Down	1.35E-119	8.34E-119
Acc19690	2953	12003	1494	-1.986726399	Down	0	0
Acc06753	1654	678.45	84.52	-1.985461242	Down	2.30E-54	7.20E-54
Acc28517	898	4048	505	-1.983437415	Down	0	0
Acc27897	1584	129.39	16.15	-1.98270347	Down	1.25E-11	1.18E-11
Acc12506	4531	291.59	36.42	-1.981721834	Down	2.80E-24	4.53E-24
Acc09173	929	1766.59	220.67	-1.981588254	Down	3.51E-138	2.47E-137
Acc09343	1481	2520	315	-1.980583418	Down	4.11E-196	4.02E-195
Acc22209	1403	80	10	-1.980583418	Down	1.02E-07	7.41E-08
Acc30542	721	72	9	-1.980583418	Down	4.42E-07	3.04E-07
Acc33289	1673	64	8	-1.980583418	Down	1.93E-06	1.25E-06
Acc18823	1796	1550	194	-1.978723076	Down	2.95E-121	1.85E-120
Acc23789	3340	2633	330	-1.97675301	Down	2.68E-204	2.77E-203
Acc04716	517	646	81	-1.97612377	Down	1.53E-51	4.58E-51
Acc04923	1417	629	79	-1.973718877	Down	3.73E-50	1.09E-49
Acc12786	2192	465.17	58.48	-1.972326258	Down	1.63E-37	3.74E-37
Acc28996	945	151	19	-1.971060644	Down	3.10E-13	3.21E-13
Acc10855	1830	277.96	35.01	-1.969621737	Down	4.79E-23	7.46E-23
Acc08382	1641	1167	147	-1.969499919	Down	3.17E-91	1.58E-90
Acc19211	610	119	15	-1.968510586	Down	1.01E-10	9.04E-11
Acc14807	1378	95	12	-1.965476526	Down	7.86E-09	6.21E-09
Acc21069	1882	1503.14	189.99	-1.964567413	Down	1.46E-116	8.87E-116
Acc15510	824	34.87	4.41	-1.963719221	Down	0.00047485	0.000235051
Acc12541	738	94.88	12	-1.963653022	Down	8.20E-09	6.47E-09
Acc09826	1163	253	32	-1.963576993	Down	4.84E-21	7.03E-21
Acc10130	1646	384.36	48.63	-1.963123125	Down	4.13E-31	8.15E-31
Acc01123	2497	4557	578	-1.959526391	Down	0	0
Acc04279	1803	68.67	8.71	-1.959518758	Down	9.73E-07	6.48E-07
Acc23964	870	181	23	-1.956867349	Down	1.97E-15	2.27E-15
Acc29027	1300	1375.98	174.88	-1.956605707	Down	2.63E-106	1.49E-105
Acc20732	581	1045	133	-1.954588209	Down	4.34E-81	1.91E-80
Acc23955	1224	275	35	-1.954588209	Down	1.33E-22	2.03E-22
Acc14221	919	275	35	-1.954588209	Down	1.33E-22	2.03E-22
Acc06229	2297	394.22	50.19	-1.954112537	Down	1.11E-31	2.22E-31
Acc30694	1470	1711.98	218	-1.953849226	Down	1.53E-131	1.03E-130
Acc16347	1034	212	27	-1.95361637	Down	8.91E-18	1.14E-17
Acc04998	929	102	13	-1.952569042	Down	2.61E-09	2.14E-09
Acc21429	1047	4104	524	-1.949975432	Down	0	0
Acc01129	2757	9362	1196	-1.949182794	Down	0	0
Acc26787	2852	12069	1543	-1.948079595	Down	0	0
Acc15375	2638	267.86	34.26	-1.947465519	Down	5.84E-22	8.77E-22
Acc05320	1285	86	11	-1.947416554	Down	4.82E-08	3.59E-08
Acc08271	1056	78	10	-1.944057542	Down	2.08E-07	1.47E-07
Acc02096	901	39	5	-1.944057542	Down	0.000241416	0.00012426
Acc08951	1049	881	113	-1.943402665	Down	3.77E-68	1.43E-67
Acc18993	593	242.44	31.12	-1.9422972	Down	5.81E-20	8.10E-20
Acc24079	3288	733.47	94.27	-1.940450744	Down	6.21E-57	2.02E-56
Acc29430	573	171	22	-1.939004314	Down	1.67E-14	1.84E-14
Acc18097	2370	427.33	54.99	-1.938692829	Down	7.32E-34	1.55E-33
Acc13600	635	303	39	-1.938355183	Down	1.74E-24	2.82E-24
Acc09390	1627	124	16	-1.934779728	Down	6.78E-11	6.16E-11
Acc19044	884	31	4	-1.934779728	Down	0.001103566	0.000519624
Acc28903	999	31	4	-1.934779728	Down	0.001103566	0.000519624
Acc09864	889	31	4	-1.934779728	Down	0.001103566	0.000519624
Acc06591	1053	31	4	-1.934779728	Down	0.001103566	0.000519624
Acc17000	1652	138.22	17.84	-1.934362282	Down	5.64E-12	5.45E-12
Acc26139	1980	355.31	45.87	-1.934038899	Down	2.37E-28	4.35E-28
Acc20260	995	2190	283	-1.93264033	Down	2.51E-165	2.09E-164
Acc01809	1672	175.72	22.75	-1.929923372	Down	8.84E-15	9.90E-15
Acc10943	3788	418.38	54.24	-1.927968222	Down	5.89E-33	1.22E-32
Acc01710	1486	220.39	28.58	-1.927564361	Down	4.03E-18	5.25E-18
Acc01814	863	500	65	-1.92399989	Down	5.98E-39	1.41E-38
Acc27859	1876	476	62	-1.921204871	Down	4.28E-37	9.72E-37
Acc24078	2485	1242.79	162	-1.920100238	Down	7.11E-94	3.61E-93
Acc21384	1906	46.01	6	-1.919496469	Down	7.69E-05	4.22E-05
Acc18918	1178	115	15	-1.919182873	Down	4.10E-10	3.54E-10
Acc15851	1299	46	6	-1.919182873	Down	7.72E-05	4.23E-05
Acc29215	1606	46	6	-1.919182873	Down	7.72E-05	4.23E-05
Acc04703	1508	2269	296	-1.918970946	Down	1.27E-169	1.08E-168
Acc31555	2622	2356.98	308	-1.916520679	Down	7.98E-176	7.08E-175
Acc23351	2550	335.7	43.87	-1.916449344	Down	1.42E-26	2.48E-26
Acc01510	1042	1247	163	-1.916101014	Down	6.26E-94	3.18E-93
Acc30642	3100	314.2	41.09	-1.915407363	Down	5.85E-25	9.66E-25
Acc08959	929	619	81	-1.914529014	Down	1.68E-47	4.66E-47
Acc23809	1007	252	33	-1.913469222	Down	2.61E-20	3.68E-20
Acc33034	1272	320.72	42.01	-1.91309305	Down	2.10E-25	3.51E-25
Acc30611	2550	1137	149	-1.912431436	Down	1.34E-85	6.26E-85
Acc25549	2111	83.9	11	-1.911750705	Down	1.01E-07	7.34E-08
Acc20515	2122	61	8	-1.911320756	Down	5.63E-06	3.49E-06
Acc31340	641	624.95	82	-1.910628373	Down	8.15E-48	2.27E-47
Acc13990	1502	99	13	-1.90950032	Down	7.48E-09	5.92E-09
Acc01350	1051	402.73	52.92	-1.908511396	Down	2.21E-31	4.39E-31
Acc14733	1616	4488	590	-1.907869234	Down	0	0
Acc27057	576	86.37	11.36	-1.907150873	Down	6.89E-08	5.08E-08
Acc02706	575	456	60	-1.906582837	Down	2.90E-35	6.33E-35
Acc08232	1077	114	15	-1.906582837	Down	5.80E-10	4.96E-10
Acc16117	740	38	5	-1.906582837	Down	0.000347394	0.000175072
Acc07241	959	38	5	-1.906582837	Down	0.000347394	0.000175072
Acc25004	1356	38	5	-1.906582837	Down	0.000347394	0.000175072
Acc15670	2193	3509	462	-1.905678609	Down	8.80E-259	1.15E-257
Acc19464	1928	129	17	-1.904347832	Down	4.53E-11	4.15E-11
Acc05857	1484	91	12	-1.903415557	Down	3.21E-08	2.43E-08
Acc28451	1677	32.76	4.32	-1.903415557	Down	0.000907781	0.000432241
Acc17863	1692	925.04	122	-1.903218021	Down	1.49E-69	5.76E-69
Acc20325	457	35.01	4.62	-1.902385723	Down	0.00060705	0.000296385
Acc33332	2078	256.97	33.93	-1.901550024	Down	1.61E-20	2.29E-20
Acc24417	1078	461.98	61	-1.901532666	Down	1.39E-35	3.05E-35
Acc30419	1005	650.04	86.01	-1.898535604	Down	2.94E-49	8.41E-49
Acc20582	5243	218.14	28.87	-1.898194744	Down	1.28E-17	1.63E-17
Acc08822	778	750.5	99.33	-1.898134073	Down	1.41E-56	4.56E-56
Acc27487	1286	68	9	-1.898121258	Down	1.83E-06	1.19E-06
Acc09328	2204	2083.7	276	-1.896990827	Down	1.39E-153	1.08E-152
Acc32619	2206	586.38	77.71	-1.896247149	Down	1.54E-44	4.06E-44
Acc18089	580	28410	3766	-1.895877344	Down	0	0
Acc19580	2182	1385	184	-1.892691723	Down	1.93E-102	1.05E-101
Acc02766	566	113.78	15.12	-1.892300359	Down	7.34E-10	6.24E-10
Acc10635	1206	842	112	-1.890904919	Down	6.13E-63	2.16E-62
Acc02236	2503	1804	240	-1.890676446	Down	1.19E-132	8.09E-132
Acc25911	1697	20506	2730	-1.889656662	Down	0	0
Acc08626	2022	330	44	-1.887474014	Down	1.18E-25	2.00E-25
Acc00733	1057	300	40	-1.887474014	Down	1.81E-23	2.85E-23
Acc24246	846	255	34	-1.887474014	Down	3.45E-20	4.85E-20
Acc29531	985	75	10	-1.887474014	Down	5.99E-07	4.07E-07
Acc26789	3633	60	8	-1.887474014	Down	8.02E-06	4.90E-06
Acc01792	1005	30	4	-1.887474014	Down	0.00159434	0.000732774
Acc02493	994	30	4	-1.887474014	Down	0.00159434	0.000732774
Acc21439	774	382.12	51	-1.886040036	Down	2.04E-29	3.85E-29
Acc33355	2798	1138.33	152.01	-1.885264131	Down	4.21E-84	1.92E-83
Acc04582	1972	876	117	-1.885005758	Down	3.86E-65	1.40E-64
Acc26610	1269	269.16	35.96	-1.884582518	Down	3.51E-21	5.12E-21
Acc22524	3621	346.02	46.23	-1.884537579	Down	9.11E-27	1.60E-26
Acc32880	1082	1055	141	-1.884059349	Down	5.10E-78	2.17E-77
Acc15646	1976	3209	429	-1.883657655	Down	3.34E-233	3.88E-232
Acc03341	2944	694.7	92.95	-1.882446745	Down	6.09E-52	1.83E-51
Acc32795	2206	2771	371	-1.881499037	Down	2.37E-201	2.39E-200
Acc09157	1484	20721	2775	-1.881117371	Down	0	0
Acc10611	1187	545	73	-1.880871279	Down	4.38E-41	1.08E-40
Acc30632	1506	1978	265	-1.880561579	Down	3.21E-144	2.33E-143
Acc13252	1669	476.35	63.83	-1.880298854	Down	4.11E-36	9.13E-36
Acc21253	2470	492.69	66.02	-1.880288564	Down	2.71E-37	6.19E-37
Acc20583	2158	282.13	37.87	-1.877816173	Down	5.02E-22	7.56E-22
Acc28360	1948	65.74	8.83	-1.876869531	Down	3.23E-06	2.05E-06
Acc01376	893	683.86	91.87	-1.876618691	Down	5.93E-51	1.75E-50
Acc15794	1256	119	16	-1.875401181	Down	3.84E-10	3.32E-10
Acc04723	1798	290	39	-1.875090289	Down	1.49E-22	2.27E-22
Acc25161	1261	2044	275	-1.874475091	Down	2.53E-148	1.89E-147
Acc17923	1319	52	7	-1.873668214	Down	3.54E-05	2.02E-05
Acc09174	1474	11605.41	1563.33	-1.872686659	Down	0	0
Acc05611	1089	1247	168	-1.872511745	Down	3.96E-91	1.96E-90
Acc01785	1696	1289	174	-1.869676471	Down	6.05E-94	3.08E-93
Acc07726	973	2570.13	347.01	-1.869375609	Down	2.67E-185	2.49E-184
Acc22533	2660	74	10	-1.868108689	Down	8.49E-07	5.69E-07
Acc07718	1131	37	5	-1.868108689	Down	0.000498334	0.000245986
Acc11725	1428	37	5	-1.868108689	Down	0.000498334	0.000245986
Acc21147	1666	38.37	5.19	-1.866755739	Down	0.000394427	0.000197628
Acc14727	731	170	23	-1.866412398	Down	8.76E-14	9.34E-14
Acc00654	1891	229	31	-1.865590896	Down	4.98E-18	6.45E-18
Acc05841	1804	672	91	-1.865106201	Down	1.06E-49	3.07E-49
Acc27830	1723	96	13	-1.865106201	Down	2.12E-08	1.62E-08
Acc18955	420	73.76	10	-1.863422074	Down	9.23E-07	6.16E-07
Acc05746	699	59	8	-1.863226467	Down	1.14E-05	6.85E-06
Acc30018	1941	1000	136	-1.858904861	Down	9.48E-73	3.81E-72
Acc30714	1334	169	23	-1.857900898	Down	1.23E-13	1.30E-13
Acc19404	1063	213	29	-1.857312043	Down	8.73E-17	1.07E-16
Acc19782	2793	5251.43	715	-1.857278603	Down	0	0
Acc10807	1688	154	21	-1.855052536	Down	1.56E-12	1.55E-12
Acc12812	1762	66	9	-1.855052536	Down	3.69E-06	2.33E-06
Acc25697	1977	1652.41	225.71	-1.852612871	Down	2.00E-118	1.23E-117
Acc22439	1218	161.05	22	-1.85251665	Down	5.10E-13	5.22E-13
Acc04694	704	527	72	-1.852317568	Down	5.25E-39	1.24E-38
Acc07097	3159	20534.15	2808.95	-1.850505797	Down	0	0
Acc11492	2928	231.14	31.62	-1.850441093	Down	5.32E-18	6.89E-18
Acc12208	1650	854	117	-1.848310958	Down	6.26E-62	2.17E-61
Acc06220	1245	1751	240	-1.847656191	Down	6.33E-125	4.09E-124
Acc08013	2313	59.35	8.14	-1.846730748	Down	1.21E-05	7.26E-06
Acc11187	1669	130.25	17.87	-1.846255251	Down	9.14E-11	8.23E-11
Acc23693	1977	1013	139	-1.846060804	Down	5.35E-73	2.15E-72
Acc21269	1945	699	95.94	-1.845671529	Down	6.37E-51	1.88E-50
Acc20046	2004	553	76	-1.843791575	Down	1.34E-40	3.26E-40
Acc10206	1565	1469	202	-1.842990616	Down	9.09E-105	5.06E-104
Acc10872	1245	697.64	95.95	-1.842711468	Down	1.02E-50	2.99E-50
Acc31757	1918	3228	444	-1.842592415	Down	9.80E-228	1.11E-226
Acc09871	1277	298	41	-1.842199934	Down	1.27E-22	1.95E-22
Acc31711	3392	36.23	4.99	-1.840656503	Down	0.000647748	0.000314928
Acc32585	2008	1720	237	-1.840033019	Down	4.52E-122	2.85E-121
Acc29019	1412	4149	572	-1.839260023	Down	2.18E-291	3.23E-290
Acc04459	1749	3684.02	508	-1.83896391	Down	6.46E-259	8.43E-258
Acc04595	1318	145	20	-1.838564413	Down	9.22E-12	8.79E-12
Acc06244	1526	87	12	-1.838564413	Down	1.28E-07	9.23E-08
Acc12074	1944	58	8	-1.838564413	Down	1.62E-05	9.56E-06
Acc28058	1789	326	45	-1.837458476	Down	1.63E-24	2.65E-24
Acc04138	1214	3218	445	-1.834870503	Down	9.42E-226	1.05E-224
Acc21495	2124	1054.49	146	-1.833088558	Down	3.33E-75	1.37E-74
Acc01290	1711	65	9	-1.83302623	Down	5.22E-06	3.25E-06
Acc24414	771	2036	282	-1.832553912	Down	2.41E-143	1.75E-142
Acc14972	1274	339	47	-1.831136029	Down	2.57E-25	4.29E-25
Acc05372	1019	929	129	-1.828890949	Down	2.84E-66	1.05E-65
Acc26898	850	324	45	-1.828580325	Down	3.18E-24	5.12E-24
Acc08833	677	108	15	-1.828580325	Down	4.56E-09	3.67E-09
Acc13840	2422	36	5	-1.828580325	Down	0.000712519	0.00034431
Acc14855	1089	36	5	-1.828580325	Down	0.000712519	0.00034431
Acc06578	1761	36	5	-1.828580325	Down	0.000712519	0.00034431
Acc08630	445	36	5	-1.828580325	Down	0.000712519	0.00034431
Acc15044	1503	763	106	-1.82820221	Down	9.93E-55	3.12E-54
Acc32606	1297	1467	204	-1.826811232	Down	2.12E-103	1.17E-102
Acc17915	1715	464.69	64.67	-1.825683501	Down	5.92E-34	1.25E-33
Acc32427	3399	934	130	-1.825494345	Down	1.87E-66	6.91E-66
Acc25505	631	13570	1889	-1.825309532	Down	0	0
Acc18500	3135	132.91	18.51	-1.824656273	Down	8.36E-11	7.55E-11
Acc06517	1451	111.29	15.51	-1.823636791	Down	2.85E-09	2.33E-09
Acc06831	3038	86	12	-1.821885672	Down	1.81E-07	1.28E-07
Acc03494	1117	43	6	-1.821885672	Down	0.000224331	0.000116016
Acc03576	1317	43	6	-1.821885672	Down	0.000224331	0.000116016
Acc32226	1851	1046	146	-1.821425995	Down	5.56E-74	2.26E-73
Acc20704	2275	117.12	16.35	-1.821208336	Down	1.14E-09	9.58E-10
Acc03587	1554	444.47	62.07	-1.820701413	Down	1.96E-32	3.99E-32
Acc10305	2126	1181	165	-1.820054453	Down	3.34E-83	1.51E-82
Acc10758	3206	22830.49	3191.39	-1.819288414	Down	0	0
Acc01878	903	1273	178	-1.818866691	Down	1.86E-89	9.04E-89
Acc31185	680	9185.94	1285.22	-1.817995442	Down	0	0
Acc11635	1347	693	97	-1.817382118	Down	1.75E-49	5.03E-49
Acc33323	786	2828	396.02	-1.816720341	Down	5.41E-196	5.29E-195
Acc14034	915	3761	527	-1.815824857	Down	8.75E-260	1.15E-258
Acc22985	1887	607.37	85.17	-1.814741814	Down	1.67E-43	4.30E-43
Acc30648	2032	1730.72	242.88	-1.813640158	Down	1.86E-120	1.16E-119
Acc21785	3274	2562.66	360.43	-1.810434498	Down	5.77E-177	5.15E-176
Acc29858	1155	35.53	5	-1.809621107	Down	0.000841909	0.00040299
Acc18557	1173	73.75	10.4	-1.806642939	Down	1.55E-06	1.01E-06
Acc33181	1403	432	61	-1.804733583	Down	3.26E-31	6.45E-31
Acc04901	1122	92	13	-1.803705656	Down	8.31E-08	6.08E-08
Acc19466	1185	92	13	-1.803705656	Down	8.31E-08	6.08E-08
Acc02442	1251	191	27	-1.803124744	Down	1.15E-14	1.28E-14
Acc30264	1322	488	69	-1.802796299	Down	5.44E-35	1.18E-34
Acc32556	905	99	14	-1.802585116	Down	2.73E-08	2.07E-08
Acc11446	2325	99	14	-1.802585116	Down	2.73E-08	2.07E-08
Acc14044	1528	142.08	20.1	-1.802019498	Down	2.79E-11	2.59E-11
Acc09030	1093	36.02	5.1	-1.800812447	Down	0.000807166	0.00038704
Acc05290	3618	176.28	24.98	-1.799606838	Down	1.28E-13	1.35E-13
Acc26920	1015	698	99	-1.798310024	Down	3.88E-49	1.11E-48
Acc05033	2571	1187.91	168.54	-1.79784602	Down	2.60E-82	1.16E-81
Acc05571	3356	36.91	5.24	-1.796956439	Down	0.000707996	0.000342403
Acc05706	4697	323.01	45.98	-1.793083877	Down	1.48E-23	2.34E-23
Acc06549	1933	309	44	-1.792614827	Down	1.34E-22	2.06E-22
Acc20543	3138	3210.24	458.02	-1.789782075	Down	1.00E-217	1.09E-216
Acc05020	1228	1807	258	-1.788736953	Down	2.39E-123	1.53E-122
Acc21501	1294	56	8	-1.78793834	Down	3.23E-05	1.85E-05
Acc25113	918	42	6	-1.78793834	Down	0.000318316	0.000161224
Acc03350	1725	35	5	-1.78793834	Down	0.001015267	0.000480291
Acc22304	1039	35	5	-1.78793834	Down	0.001015267	0.000480291
Acc05969	1632	3897	557	-1.787198117	Down	2.50E-263	3.33E-262
Acc07611	1774	15244	2180	-1.786424891	Down	0	0
Acc20586	603	576.8	82.49	-1.786363441	Down	1.49E-40	3.64E-40
Acc14027	1360	629	90	-1.785646529	Down	4.85E-44	1.27E-43
Acc21684	2589	102.48	14.68	-1.784001925	Down	1.97E-08	1.51E-08
Acc32051	1568	2518	361	-1.782790959	Down	2.59E-170	2.23E-169
Acc14526	1019	948	136	-1.781863826	Down	2.80E-65	1.02E-64
Acc06538	2045	1533	220	-1.781365686	Down	2.35E-104	1.30E-103
Acc28834	1074	47.87	6.87	-1.78132322	Down	0.000126367	6.75E-05
Acc14202	1411	36084	5189	-1.778414251	Down	0	0
Acc17473	2064	10957	1576	-1.778096824	Down	0	0
Acc04785	1796	410	59	-1.777420468	Down	3.99E-29	7.48E-29
Acc19755	555	132	19	-1.777050024	Down	2.08E-10	1.84E-10
Acc17727	3301	257	37	-1.776754602	Down	7.55E-19	1.01E-18
Acc15927	1490	118	17	-1.775763626	Down	1.91E-09	1.57E-09
Acc19352	1588	116.1	16.74	-1.774579957	Down	2.61E-09	2.14E-09
Acc27463	1081	33.98	4.9	-1.774415616	Down	0.001277125	0.000595642
Acc20992	351	201	29	-1.773654114	Down	4.81E-15	5.46E-15
Acc20247	2453	1420	205	-1.772778533	Down	3.57E-96	1.86E-95
Acc32137	561	90	13	-1.771996796	Down	1.63E-07	1.16E-07
Acc08686	991	242	35	-1.770163638	Down	9.35E-18	1.20E-17
Acc08225	1848	1672.51	242	-1.769519302	Down	1.20E-112	7.11E-112
Acc15323	525	442	64	-1.768485977	Down	4.62E-31	9.08E-31
Acc29388	1384	4565	661	-1.768476101	Down	1.14E-303	1.73E-302
Acc32621	5158	2110.79	305.68	-1.768272404	Down	1.65E-141	1.18E-140
Acc05903	1693	158.5	22.96	-1.767871711	Down	3.95E-12	3.85E-12
Acc01375	896	3011.5	436.39	-1.76737573	Down	6.99E-201	7.02E-200
Acc19977	2628	69	10	-1.76717978	Down	4.72E-06	2.94E-06
Acc28337	1131	69	10	-1.76717978	Down	4.72E-06	2.94E-06
Acc04775	2513	467	67.69	-1.766991346	Down	1.09E-32	2.25E-32
Acc10505	1793	372	54	-1.764854727	Down	2.46E-26	4.26E-26
Acc31440	547	62	9	-1.764854727	Down	1.46E-05	8.68E-06
Acc14081	2742	912.43	132.52	-1.764087192	Down	4.68E-62	1.63E-61
Acc03406	873	179	26	-1.763959477	Down	1.80E-13	1.89E-13
Acc14225	2187	2498	363	-1.763315442	Down	1.87E-166	1.57E-165
Acc17707	1019	7466	1085	-1.763223884	Down	0	0
Acc14437	1678	357	52	-1.759923964	Down	3.02E-25	5.02E-25
Acc24893	1143	5069	739	-1.758638312	Down	0	0
Acc10242	920	48	7	-1.758190997	Down	0.000142376	7.55E-05
Acc22511	4799	3586.61	523.08	-1.758100782	Down	4.05E-237	4.79E-236
Acc01596	2064	347.2	50.66	-1.757431384	Down	1.49E-24	2.43E-24
Acc31990	1793	185	27	-1.757077376	Down	8.35E-14	8.91E-14
Acc21967	5471	188.75	27.55	-1.756935839	Down	4.71E-14	5.09E-14
Acc26021	1416	75.3	11	-1.755729759	Down	1.94E-06	1.25E-06
Acc23754	2811	8150	1191	-1.755210064	Down	0	0
Acc09064	3374	326.64	47.75	-1.754712252	Down	3.78E-23	5.91E-23
Acc05633	1284	752	110	-1.753812556	Down	4.63E-51	1.37E-50
Acc30389	811	41	6	-1.753172922	Down	0.00045027	0.00022363
Acc22518	1281	41	6	-1.753172922	Down	0.00045027	0.00022363
Acc00008	989	273	40.04	-1.74997049	Down	1.53E-19	2.10E-19
Acc24712	1063	129.48	19	-1.749241365	Down	4.80E-10	4.13E-10
Acc05003	1434	586	86	-1.749075518	Down	4.93E-40	1.19E-39
Acc07805	1114	5353.89	785.74	-1.749047005	Down	0	0
Acc01138	1973	1226	180	-1.748473585	Down	9.50E-82	4.19E-81
Acc20306	1438	2300.09	338.05	-1.746965179	Down	1.77E-151	1.35E-150
Acc19520	1610	34.01	5	-1.746542424	Down	0.001436426	0.000665628
Acc25235	2728	102	15	-1.746118164	Down	3.42E-08	2.58E-08
Acc11404	1482	34	5	-1.746118164	Down	0.001441443	0.000667768
Acc07548	1346	4284	631	-1.743829988	Down	1.22E-279	1.75E-278
Acc09255	1212	74.61	11	-1.742448903	Down	2.44E-06	1.57E-06
Acc16364	1065	1037	153	-1.741395754	Down	4.71E-69	1.80E-68
Acc25149	900	61	9	-1.741395754	Down	2.05E-05	1.20E-05
Acc28480	2370	7882	1163	-1.741294071	Down	0	0
Acc08717	536	454	67	-1.741042715	Down	3.29E-31	6.50E-31
Acc17888	1888	393	58	-1.740987925	Down	3.07E-27	5.46E-27
Acc11389	601	271	40	-1.740804364	Down	2.80E-19	3.81E-19
Acc25949	831	3582	529	-1.740009128	Down	1.86E-233	2.16E-232
Acc31532	1882	3453	510	-1.7398646	Down	4.23E-225	4.72E-224
Acc01280	1400	2786	412	-1.738062433	Down	9.23E-182	8.44E-181
Acc31008	1085	767.68	113.53	-1.738014905	Down	1.86E-51	5.55E-51
Acc10951	1576	74.56	11.03	-1.737552487	Down	2.57E-06	1.65E-06
Acc20310	941	626.01	92.67	-1.736594844	Down	3.06E-42	7.72E-42
Acc29006	2441	6106	904	-1.73641633	Down	0	0
Acc01071	2037	1775.79	263	-1.735909696	Down	2.19E-116	1.33E-115
Acc20580	1067	137.86	20.42	-1.735732567	Down	1.67E-10	1.48E-10
Acc19748	1096	81	12	-1.73547092	Down	9.73E-07	6.48E-07
Acc25989	3912	518.9	76.9	-1.734984451	Down	2.89E-35	6.30E-35
Acc32570	648	263	39	-1.734100188	Down	1.15E-18	1.53E-18
Acc17034	2943	3560	528	-1.733850824	Down	6.71E-231	7.71E-230
Acc09309	4238	364	54	-1.733490556	Down	3.31E-25	5.50E-25
Acc15819	2724	182	27	-1.733490556	Down	2.23E-13	2.32E-13
Acc26713	2317	2143.2	318.54	-1.730803452	Down	1.74E-139	1.23E-138
Acc16377	4779	201.79	30	-1.730403694	Down	1.23E-14	1.36E-14
Acc27791	1619	733	109	-1.730068481	Down	6.55E-49	1.86E-48
Acc05683	1516	2272.72	338	-1.729908221	Down	1.09E-147	8.14E-147
Acc26199	1750	52.07	7.75	-1.728767609	Down	9.02E-05	4.91E-05
Acc13804	1684	47	7	-1.727817348	Down	0.00020028	0.000104215
Acc15234	1405	47	7	-1.727817348	Down	0.00020028	0.000104215
Acc28077	922	315	47	-1.725202585	Down	6.79E-22	1.02E-21
Acc27607	2761	305.99	45.67	-1.724749228	Down	2.63E-21	3.85E-21
Acc19020	2139	67	10	-1.724744514	Down	9.23E-06	5.60E-06
Acc20274	5072	2324	347	-1.724185919	Down	2.76E-150	2.10E-149
Acc14478	1940	2966	443	-1.723723412	Down	3.64E-191	3.49E-190
Acc07601	1530	1312	196	-1.723425578	Down	1.21E-85	5.65E-85
Acc16212	468	435	65	-1.723087196	Down	1.45E-29	2.74E-29
Acc27370	2696	1037	155	-1.722659192	Down	4.81E-68	1.82E-67
Acc00049	1049	2273	340	-1.721574451	Down	1.01E-146	7.45E-146
Acc12448	1908	2104.15	314.8	-1.721313527	Down	6.04E-136	4.19E-135
Acc12814	2641	8629	1292	-1.720170726	Down	0	0
Acc21365	2610	2736	410	-1.718955833	Down	7.98E-176	7.08E-175
Acc05414	1823	3042.57	456	-1.718768144	Down	2.90E-195	2.82E-194
Acc06459	525	60	9	-1.717549012	Down	2.86E-05	1.65E-05
Acc09761	4773	40	6	-1.717549012	Down	0.000634856	0.000309226
Acc23007	1345	50.15	7.53	-1.716111349	Down	0.000131848	7.02E-05
Acc04255	825	1440.19	216.25	-1.716070535	Down	2.83E-93	1.43E-92
Acc23567	1968	253	38	-1.715649479	Down	9.08E-18	1.16E-17
Acc10707	1090	36.81	5.53	-1.715329782	Down	0.001059468	0.000500215
Acc11117	1072	193	29	-1.71505946	Down	6.55E-14	7.03E-14
Acc24754	1894	641.32	96.53	-1.712578533	Down	1.98E-42	5.03E-42
Acc27475	1162	113	17.01	-1.712451145	Down	1.00E-08	7.88E-09
Acc01836	1911	3849.45	579.5	-1.712355183	Down	3.29E-245	4.03E-244
Acc27702	997	166	25	-1.71176666	Down	3.84E-12	3.74E-12
Acc04973	4378	776	117	-1.710131541	Down	7.19E-51	2.12E-50
Acc03704	3928	683	103	-1.709824659	Down	5.64E-45	1.49E-44
Acc04541	539	179	27	-1.709511693	Down	5.89E-13	6.00E-13
Acc29492	739	159	24	-1.708503873	Down	1.15E-11	1.09E-11
Acc22273	937	53	8	-1.708503873	Down	8.93E-05	4.86E-05
Acc31671	6353	1637.81	247.23	-1.708425698	Down	3.71E-105	2.07E-104
Acc05550	1702	7529	1137	-1.707809423	Down	0	0
Acc23113	1935	60.96	9.21	-1.707173259	Down	2.68E-05	1.55E-05
Acc05252	1468	180.2	27.24	-1.706383821	Down	5.28E-13	5.40E-13
Acc08011	1045	1798	272	-1.705297882	Down	5.85E-115	3.52E-114
Acc13951	2091	2967.97	449	-1.705272577	Down	1.89E-188	1.79E-187
Acc26998	1274	330	50	-1.703049442	Down	1.77E-22	2.70E-22
Acc06657	2317	33	5	-1.703049442	Down	0.002038774	0.000921329
Acc24673	1465	33	5	-1.703049442	Down	0.002038774	0.000921329
Acc24185	1735	33	5	-1.703049442	Down	0.002038774	0.000921329
Acc01374	915	3964.68	601	-1.702350949	Down	1.99E-250	2.49E-249
Acc09949	1647	244	36.99	-1.70225736	Down	5.09E-17	6.30E-17
Acc29581	899	646	97.99	-1.70141115	Down	2.38E-42	6.01E-42
Acc23252	1961	140.6	21.34	-1.700547931	Down	2.01E-10	1.78E-10
Acc03739	1733	336	51	-1.700475499	Down	8.20E-23	1.27E-22
Acc11726	1120	36.63	5.56	-1.700452331	Down	0.001169346	0.000548165
Acc02189	1628	3233.01	491	-1.699666458	Down	3.76E-204	3.87E-203
Acc04598	1639	678	103	-1.699224354	Down	2.77E-44	7.25E-44
Acc29364	2918	1290	196	-1.699028924	Down	1.33E-82	5.95E-82
Acc10112	1164	329	50	-1.698671002	Down	2.44E-22	3.71E-22
Acc15071	1971	59.06	8.98	-1.697977424	Down	3.83E-05	2.17E-05
Acc26202	1159	92	14	-1.696790452	Down	2.79E-07	1.95E-07
Acc07748	917	46	7	-1.696790452	Down	0.000280901	0.000143202
Acc33089	871	46	7	-1.696790452	Down	0.000280901	0.000143202
Acc09642	465	46	7	-1.696790452	Down	0.000280901	0.000143202
Acc10688	647	46	7	-1.696790452	Down	0.000280901	0.000143202
Acc03993	2583	2924	445	-1.696649488	Down	2.22E-184	2.06E-183
Acc13994	3277	6512	992	-1.695272092	Down	0	0
Acc11396	1995	1956	298	-1.695105552	Down	7.47E-124	4.79E-123
Acc29367	1583	6917	1054	-1.694855007	Down	0	0
Acc06864	711	16262.47	2480.72	-1.693299002	Down	0	0
Acc00650	1671	141.99	21.69	-1.691270788	Down	1.93E-10	1.70E-10
Acc11810	2277	72	11	-1.691076801	Down	5.80E-06	3.59E-06
Acc17530	871	667	102	-1.689701027	Down	2.90E-43	7.46E-43
Acc08406	691	255	39	-1.689534636	Down	1.51E-17	1.91E-17
Acc04206	1306	85	13	-1.689534636	Down	8.54E-07	5.72E-07
Acc06866	679	635.39	97.26	-1.688307306	Down	3.00E-41	7.40E-41
Acc15432	1116	141.05	21.6	-1.687686866	Down	2.35E-10	2.07E-10
Acc02648	3921	251.52	38.52	-1.687576932	Down	2.65E-17	3.32E-17
Acc33377	2905	5721.52	876.69	-1.686843191	Down	0	0
Acc08004	1493	254.84	39.07	-1.686042	Down	1.72E-17	2.17E-17
Acc03400	1536	463	71	-1.685704682	Down	1.86E-30	3.60E-30
Acc29856	1123	171.71	26.34	-1.685230228	Down	2.87E-12	2.82E-12
Acc33666	2875	489.32	75.09	-1.684668972	Down	4.56E-32	9.23E-32
Acc04300	2501	495	76	-1.68394062	Down	2.11E-32	4.31E-32
Acc00278	1570	2148	330	-1.683039482	Down	1.81E-134	1.24E-133
Acc02256	2271	807	124	-1.682811971	Down	1.11E-51	3.31E-51
Acc17745	2607	357.33	54.92	-1.682436929	Down	8.05E-24	1.28E-23
Acc32820	1094	1314	202	-1.682121496	Down	5.96E-83	2.68E-82
Acc04088	1069	1190	183	-1.681629438	Down	2.86E-75	1.18E-74
Acc02409	1028	117	18	-1.681023136	Down	8.68E-09	6.83E-09
Acc15298	1041	78	12	-1.681023136	Down	2.62E-06	1.68E-06
Acc16062	740	52	8	-1.681023136	Down	0.000124792	6.67E-05
Acc17514	2262	1956	301	-1.680654396	Down	2.19E-122	1.39E-121
Acc12364	876	842.84	129.8	-1.679551819	Down	9.35E-54	2.90E-53
Acc07188	2216	1318.36	203.05	-1.679420862	Down	4.92E-83	2.21E-82
Acc28464	1479	71.39	11	-1.678801896	Down	7.09E-06	4.35E-06
Acc15403	3428	3036	468	-1.678174774	Down	1.88E-188	1.78E-187
Acc02763	1177	633.21	97.79	-1.67550861	Down	1.08E-40	2.64E-40
Acc01260	636	110	17	-1.67448029	Down	2.63E-08	2.00E-08
Acc19445	2279	5167.34	798.81	-1.674080933	Down	0	0
Acc08262	1356	782	121	-1.672744978	Down	9.98E-50	2.88E-49
Acc19389	1773	464.85	71.98	-1.671680666	Down	3.12E-30	6.00E-30
Acc04399	1386	1285	199	-1.671511442	Down	1.88E-80	8.18E-80
Acc02586	870	4303.76	666.61	-1.671266181	Down	1.00E-264	1.35E-263
Acc17504	821	71	11	-1.670898919	Down	8.05E-06	4.92E-06
Acc22854	1107	800	124	-1.670243297	Down	9.99E-51	2.94E-50
Acc10187	1624	259.84	40.29	-1.669713245	Down	1.40E-17	1.78E-17
Acc13086	1854	1409.97	218.68	-1.669354699	Down	6.18E-88	2.96E-87
Acc18538	1095	709	110	-1.668865522	Down	4.16E-45	1.10E-44
Acc12508	1903	58	9	-1.668639412	Down	5.56E-05	3.11E-05
Acc31049	1387	818	127	-1.667855764	Down	1.00E-51	3.00E-51
Acc21788	2369	183.96	28.57	-1.667402579	Down	7.26E-13	7.36E-13
Acc23626	2369	309	48	-1.667083945	Down	1.44E-20	2.06E-20
Acc32948	860	103	16	-1.667083945	Down	7.98E-08	5.85E-08
Acc18949	851	103	16	-1.667083945	Down	7.98E-08	5.85E-08
Acc23272	1189	103	16	-1.667083945	Down	7.98E-08	5.85E-08
Acc20356	850	553	86	-1.665454334	Down	1.82E-35	3.99E-35
Acc31654	2676	90	14	-1.665081592	Down	5.35E-07	3.65E-07
Acc24096	1390	45	7	-1.665081592	Down	0.000392771	0.000196838
Acc19928	2347	45	7	-1.665081592	Down	0.000392771	0.000196838
Acc10134	2133	2430	378.04	-1.664928934	Down	1.42E-149	1.07E-148
Acc23838	2465	83.45	12.99	-1.664094037	Down	1.40E-06	9.17E-07
Acc01466	2248	8413.99	1310.01	-1.663795697	Down	0	0
Acc27478	1372	122	19	-1.663393242	Down	5.46E-09	4.36E-09
Acc13996	2570	3724	580	-1.663311686	Down	8.19E-228	9.28E-227
Acc28063	1787	18322.23	2856	-1.662110638	Down	0	0
Acc07525	4389	212.44	33.14	-1.660993345	Down	1.49E-14	1.65E-14
Acc15366	3408	492.41	76.87	-1.659950905	Down	1.27E-31	2.53E-31
Acc21373	596	474	74	-1.659873301	Down	1.67E-30	3.25E-30
Acc05324	3789	262.4	40.98	-1.659359248	Down	1.35E-17	1.72E-17
Acc31261	2310	96	15	-1.658655323	Down	2.42E-07	1.71E-07
Acc09643	498	64	10	-1.658655323	Down	2.49E-05	1.44E-05
Acc31187	1150	4845	759	-1.654908293	Down	1.23E-293	1.85E-292
Acc14443	633	134	21	-1.654355186	Down	1.14E-09	9.53E-10
Acc03620	1572	51	8	-1.65300876	Down	0.000173819	9.12E-05
Acc32350	1002	172	27	-1.651960671	Down	5.52E-12	5.33E-12
Acc07901	3003	6684.73	1050	-1.65106338	Down	0	0
Acc20574	1279	86.09	13.53	-1.650267246	Down	1.10E-06	7.32E-07
Acc28055	2304	191.25	30.06	-1.650126251	Down	3.84E-13	3.95E-13
Acc15361	1459	101.2	15.91	-1.649786967	Down	1.28E-07	9.24E-08
Acc15026	1297	1819	286	-1.649641909	Down	5.06E-111	2.97E-110
Acc14043	2647	731.03	115.02	-1.648629288	Down	1.10E-45	2.96E-45
Acc13246	1031	578	91	-1.64771446	Down	1.86E-36	4.16E-36
Acc08817	1572	95.39	15.02	-1.647536638	Down	3.02E-07	2.10E-07
Acc02655	949	36938	5825	-1.645359217	Down	0	0
Acc05862	1243	1598	252	-1.645355187	Down	2.05E-97	1.08E-96
Acc31786	807	1153	182	-1.643965575	Down	9.90E-71	3.88E-70
Acc19958	1133	551	87	-1.643548431	Down	1.03E-34	2.21E-34
Acc11898	957	76	12	-1.643548431	Down	5.01E-06	3.12E-06
Acc18508	937	57	9	-1.643548431	Down	7.73E-05	4.24E-05
Acc06312	1522	38	6	-1.643548431	Down	0.001249093	0.000583351
Acc26005	4646	101.76	16.09	-1.641517763	Down	1.31E-07	9.46E-08
Acc32263	713	411	65	-1.641210189	Down	2.87E-26	4.95E-26
Acc15699	559	392	62	-1.641096952	Down	3.98E-25	6.60E-25
Acc11978	2342	4488	710	-1.640765164	Down	7.24E-269	9.91E-268
Acc27731	1359	644	101.99	-1.639216402	Down	3.88E-40	9.38E-40
Acc06963	3833	8049	1275	-1.638895726	Down	0	0
Acc13627	2523	101	16	-1.638794901	Down	1.51E-07	1.08E-07
Acc24886	2307	82	13	-1.637695704	Down	2.26E-06	1.45E-06
Acc06902	945	138	21.9	-1.63624891	Down	8.74E-10	7.39E-10
Acc11386	854	50.39	8	-1.635648969	Down	0.000212456	0.00011013
Acc04290	745	554	88	-1.634893965	Down	1.21E-34	2.60E-34
Acc21027	745	78.94	12.54	-1.634802589	Down	3.59E-06	2.27E-06
Acc12052	1086	195	31	-1.633717421	Down	3.34E-13	3.45E-13
Acc01572	2161	5707.24	907.33	-1.633677384	Down	0	0
Acc30171	2395	141.97	22.58	-1.63305213	Down	5.31E-10	4.56E-10
Acc10147	1972	333	53	-1.632041331	Down	1.98E-21	2.91E-21
Acc17113	1812	49.13	7.82	-1.631947144	Down	0.000261027	0.000133753
Acc10574	1738	540	86	-1.63113426	Down	1.05E-33	2.21E-33
Acc24045	903	144.35	23	-1.630448759	Down	3.99E-10	3.45E-10
Acc09801	909	3916	624	-1.630346249	Down	9.35E-233	1.08E-231
Acc21780	2004	393.22	62.66	-1.630303445	Down	5.60E-25	9.25E-25
Acc02428	1221	67.96	10.83	-1.630236028	Down	1.78E-05	1.05E-05
Acc22772	3483	721.61	115	-1.630168888	Down	2.00E-44	5.26E-44
Acc23858	3316	2024.25	322.68	-1.629794829	Down	3.04E-121	1.91E-120
Acc12433	2052	7677.79	1225.06	-1.628422109	Down	0	0
Acc17279	702	94	15	-1.628281674	Down	4.60E-07	3.16E-07
Acc04662	2034	94	15	-1.628281674	Down	4.60E-07	3.16E-07
Acc05700	4032	135.34	21.63	-1.626066141	Down	1.50E-09	1.25E-09
Acc18789	1509	319	51	-1.62557069	Down	1.73E-20	2.46E-20
Acc30863	630	4078	652	-1.625501324	Down	2.84E-241	3.42E-240
Acc16284	604	75	12	-1.624439608	Down	6.91E-06	4.25E-06
Acc07237	2816	268.07	42.91	-1.623807387	Down	1.93E-17	2.43E-17
Acc28389	2182	1411	226	-1.622906728	Down	1.36E-84	6.22E-84
Acc08584	502	156	25	-1.622129447	Down	9.29E-11	8.36E-11
Acc03510	668	574	92	-1.621928389	Down	1.91E-35	4.18E-35
Acc27080	7849	1075.31	172.51	-1.620584152	Down	8.77E-65	3.17E-64
Acc02235	2160	609.36	97.81	-1.619824341	Down	1.86E-37	4.26E-37
Acc00015	2082	2710	435	-1.619788964	Down	3.13E-160	2.53E-159
Acc11099	3812	501.5	80.51	-1.619593225	Down	4.03E-31	7.95E-31
Acc28461	825	355	57	-1.619368618	Down	1.67E-22	2.55E-22
Acc19386	1896	193	31	-1.618844145	Down	6.25E-13	6.36E-13
Acc20351	2347	8665.18	1392.29	-1.618353395	Down	0	0
Acc02060	753	280	45	-1.618013339	Down	4.60E-18	5.96E-18
Acc02554	1403	56	9	-1.618013339	Down	0.000106984	5.77E-05
Acc13445	5055	2180.51	350.66	-1.617104249	Down	5.16E-129	3.42E-128
Acc04717	625	15746	2533	-1.616649819	Down	0	0
Acc23383	1714	1856.67	298.72	-1.616435097	Down	4.41E-110	2.56E-109
Acc21951	3236	2819.66	454	-1.615340426	Down	5.56E-166	4.66E-165
Acc05300	943	1521	245	-1.614749917	Down	2.14E-90	1.05E-89
Acc14223	711	446.75	72	-1.613982336	Down	8.96E-28	1.62E-27
Acc26210	1344	428	69	-1.613525948	Down	1.15E-26	2.00E-26
Acc10282	1451	1134	183	-1.612088505	Down	1.02E-67	3.84E-67
Acc08615	1580	14173.27	2289.22	-1.610828046	Down	0	0
Acc05921	3109	52804	8532.08	-1.61026124	Down	0	0
Acc25784	1536	940	152	-1.609172851	Down	2.65E-56	8.55E-56
Acc06829	1577	2867.44	463.78	-1.608834205	Down	8.59E-168	7.26E-167
Acc02656	802	136	22	-1.608614641	Down	1.83E-09	1.51E-09
Acc15557	1058	119.92	19.4	-1.608527149	Down	1.65E-08	1.27E-08
Acc12358	3021	768.68	124.38	-1.608212028	Down	2.50E-46	6.81E-46
Acc21169	1524	296.91	48.05	-1.608000766	Down	6.63E-19	8.87E-19
Acc13435	915	1421	230	-1.607784206	Down	4.59E-84	2.09E-83
Acc10088	2337	105	17	-1.607366094	Down	1.29E-07	9.31E-08
Acc25175	931	358	58	-1.6064182	Down	1.94E-22	2.96E-22
Acc33595	1130	111	18	-1.605074283	Down	5.86E-08	4.34E-08
Acc21590	1768	37	6	-1.605074283	Down	0.001742533	0.000795696
Acc17092	1175	5734	930	-1.604822701	Down	0	0
Acc12938	1346	353.42	57.33	-1.604604918	Down	3.87E-22	5.86E-22
Acc10849	1361	625.63	101.49	-1.604555529	Down	6.51E-38	1.51E-37
Acc06783	1162	5442	883	-1.604235032	Down	0	0
Acc15634	875	154	25	-1.603513769	Down	1.74E-10	1.54E-10
Acc06830	599	114.26	18.55	-1.603412761	Down	3.84E-08	2.89E-08
Acc04227	2107	80	13	-1.602071795	Down	4.27E-06	2.68E-06
Acc06792	1245	5923.16	963.1	-1.601192968	Down	0	0
Acc16800	1460	166	27	-1.600735347	Down	3.62E-11	3.34E-11
Acc01232	1203	43	7	-1.599493251	Down	0.000760527	0.000366104
Acc33082	860	43	7	-1.599493251	Down	0.000760527	0.000366104
Acc09131	601	44.63	7.27	-1.598569955	Down	0.000606787	0.000296271
Acc28223	1777	3121.13	508.46	-1.598445679	Down	8.93E-181	8.13E-180
Acc16988	1463	13351	2176	-1.597780761	Down	0	0
Acc32126	3065	539.99	88.01	-1.597776746	Down	9.13E-33	1.88E-32
Acc27220	869	71.45	11.65	-1.597187474	Down	1.46E-05	8.65E-06
Acc09228	642	834	136	-1.59702415	Down	1.25E-49	3.60E-49
Acc05313	1597	643.74	105	-1.596672206	Down	1.07E-38	2.52E-38
Acc29688	1414	1422	232	-1.596308172	Down	2.82E-83	1.27E-82
Acc19141	1642	136.01	22.2	-1.595664564	Down	2.27E-09	1.86E-09
Acc03601	1219	3931	642	-1.594834579	Down	2.09E-226	2.35E-225
Acc06295	1453	251	41	-1.594574967	Down	4.81E-16	5.69E-16
Acc32222	1176	1083	177	-1.593795396	Down	9.99E-64	3.56E-63
Acc02086	591	318	52	-1.593026655	Down	6.92E-20	9.62E-20
Acc03527	1384	318	52	-1.593026655	Down	6.92E-20	9.62E-20
Acc13835	5389	1491.31	244.46	-1.589493274	Down	1.03E-86	4.83E-86
Acc06942	1450	1519	249	-1.58948764	Down	2.73E-88	1.31E-87
Acc19239	1907	68.2	11.18	-1.589434969	Down	2.43E-05	1.41E-05
Acc21377	948	1932	317	-1.588123767	Down	1.24E-111	7.31E-111
Acc01573	867	67	11	-1.58724099	Down	2.92E-05	1.68E-05
Acc20538	1515	10390.67	1706.47	-1.586785145	Down	0	0
Acc25099	1005	1138	187	-1.5859738	Down	2.08E-66	7.71E-66
Acc02804	840	7380.42	1213.38	-1.5852549	Down	0	0
Acc18599	808	152	25	-1.584654742	Down	3.23E-10	2.81E-10
Acc07752	878	1149	189	-1.584504076	Down	6.06E-67	2.25E-66
Acc14332	1357	79	13	-1.583924448	Down	5.86E-06	3.63E-06
Acc26375	2698	79	13	-1.583924448	Down	5.86E-06	3.63E-06
Acc25765	887	1118	184	-1.583725935	Down	3.84E-65	1.39E-64
Acc03430	2292	6166	1015	-1.58343858	Down	0	0
Acc08918	1989	959	158	-1.582189675	Down	4.63E-56	1.49E-55
Acc01718	1075	976	161	-1.580403877	Down	6.22E-57	2.03E-56
Acc15193	1740	115	19	-1.578145955	Down	4.97E-08	3.70E-08
Acc31857	1170	5801	959	-1.577282317	Down	0	0
Acc05716	1920	2849.5	471.07	-1.577278848	Down	4.25E-162	3.47E-161
Acc32862	2486	428.72	71	-1.574728209	Down	7.67E-26	1.30E-25
Acc17581	1578	1128.08	187	-1.573342626	Down	4.17E-65	1.51E-64
Acc09444	1569	26315.35	4366.22	-1.572031271	Down	0	0
Acc13291	2114	849	141	-1.570652809	Down	2.50E-49	7.17E-49
Acc12425	1293	1168	194	-1.570495135	Down	3.58E-67	1.34E-66
Acc07545	1682	662	110	-1.569911111	Down	7.99E-39	1.88E-38
Acc16567	2023	1257	209	-1.56899322	Down	4.73E-72	1.88E-71
Acc23503	1748	5617.01	934	-1.568891334	Down	0	0
Acc04996	1544	126.53	21.04	-1.568856294	Down	1.23E-08	9.63E-09
Acc23487	3530	1678.12	279.09	-1.568626965	Down	1.59E-95	8.23E-95
Acc20640	1002	499	83	-1.568439992	Down	1.21E-29	2.30E-29
Acc20261	948	523	87	-1.568307058	Down	5.51E-31	1.08E-30
Acc24820	1197	3282	546	-1.568185801	Down	7.59E-185	7.05E-184
Acc10534	1716	727	121	-1.567531735	Down	2.24E-42	5.68E-42
Acc23156	1717	727	121	-1.567531735	Down	2.24E-42	5.68E-42
Acc32333	3238	3137.74	522.32	-1.567303379	Down	1.14E-176	1.02E-175
Acc12813	1782	6890	1147	-1.56722201	Down	0	0
Acc23227	399	4796	799	-1.566147668	Down	1.22E-268	1.66E-267
Acc26220	1834	438	73	-1.565545919	Down	3.72E-26	6.38E-26
Acc00287	1918	222	37	-1.565545919	Down	5.01E-14	5.40E-14
Acc32471	812	216	36	-1.565545919	Down	1.09E-13	1.16E-13
Acc22396	1718	156	26	-1.565545919	Down	2.73E-10	2.38E-10
Acc19935	1064	96	16	-1.565545919	Down	7.31E-07	4.94E-07
Acc17184	1526	84	14	-1.565545919	Down	3.60E-06	2.28E-06
Acc19990	1587	78	13	-1.565545919	Down	8.03E-06	4.90E-06
Acc03083	2234	72	12	-1.565545919	Down	1.79E-05	1.05E-05
Acc25282	1451	72	12	-1.565545919	Down	1.79E-05	1.05E-05
Acc03394	3226	54	9	-1.565545919	Down	0.000203505	0.00010574
Acc02242	1883	42	7	-1.565545919	Down	0.001052918	0.000497193
Acc20991	721	1173.16	195.57	-1.565226219	Down	3.86E-67	1.44E-66
Acc17936	3056	41.86	6.98	-1.564856788	Down	0.001077463	0.000508164
Acc07866	1393	217.15	36.21	-1.564815289	Down	9.59E-14	1.02E-13
Acc28462	2040	210.44	35.12	-1.563627623	Down	2.36E-13	2.46E-13
Acc30686	1153	2879.96	480.93	-1.562733364	Down	1.21E-161	9.90E-161
Acc25267	1591	353	59	-1.561464742	Down	2.56E-21	3.75E-21
Acc13783	786	2697	451	-1.560739601	Down	3.18E-151	2.42E-150
Acc01421	735	287	48	-1.560527844	Down	1.30E-17	1.65E-17
Acc33111	2176	173.89	29.11	-1.559171642	Down	3.01E-11	2.79E-11
Acc22255	1589	215	36	-1.558851266	Down	1.48E-13	1.56E-13
Acc31607	1098	2102	352	-1.558698753	Down	4.43E-118	2.72E-117
Acc08754	1724	465.47	78	-1.557725577	Down	1.67E-27	2.99E-27
Acc10366	1627	173	29	-1.557230651	Down	3.52E-11	3.25E-11
Acc13099	1717	501	84	-1.556932788	Down	1.86E-29	3.52E-29
Acc16888	955	549.37	92.14	-1.556462045	Down	4.00E-32	8.10E-32
Acc25880	1065	632	106	-1.556443712	Down	1.06E-36	2.39E-36
Acc31033	1619	149	25	-1.555895749	Down	8.12E-10	6.88E-10
Acc08476	1522	130.72	21.94	-1.555427876	Down	8.81E-09	6.93E-09
Acc33086	2008	113.01	19	-1.552962533	Down	9.18E-08	6.70E-08
Acc04824	3181	2630.75	442.32	-1.552895192	Down	1.72E-146	1.27E-145
Acc23609	1691	1879	316	-1.552552021	Down	3.65E-105	2.04E-104
Acc21518	1397	527.9	88.81	-1.552054046	Down	8.18E-31	1.60E-30
Acc26597	1224	75.04	12.63	-1.551388607	Down	1.36E-05	8.11E-06
Acc01774	1888	202	34	-1.551332059	Down	9.55E-13	9.64E-13
Acc15648	1659	980	165	-1.550899143	Down	1.17E-55	3.74E-55
Acc33727	1351	760	128	-1.550439026	Down	1.52E-43	3.92E-43
Acc03418	2493	2089	352	-1.549748576	Down	2.14E-116	1.30E-115
Acc31244	901	267	45	-1.549426253	Down	2.45E-16	2.94E-16
Acc31246	707	89	15	-1.549426253	Down	2.21E-06	1.43E-06
Acc19258	1360	118.39	19.96	-1.548947019	Down	4.83E-08	3.60E-08
Acc23389	2657	166	28	-1.548267927	Down	1.04E-10	9.38E-11
Acc10573	1131	3385	571	-1.548176601	Down	4.42E-187	4.17E-186
Acc32823	1537	409	69	-1.548015994	Down	3.70E-24	5.94E-24
Acc23765	2183	1132	191	-1.547812833	Down	7.91E-64	2.82E-63
Acc12438	1651	883	149	-1.547684525	Down	3.52E-50	1.03E-49
Acc00172	994	314	53	-1.547283712	Down	6.63E-19	8.86E-19
Acc02654	906	10705	1807	-1.547199802	Down	0	0
Acc17526	985	77	13	-1.546930241	Down	1.10E-05	6.60E-06
Acc02895	1103	687	116	-1.546768712	Down	2.13E-39	5.07E-39
Acc29753	1586	111.35	18.81	-1.546113222	Down	1.25E-07	9.03E-08
Acc19096	1278	213	36	-1.545368037	Down	2.71E-13	2.81E-13
Acc18382	1571	9335	1577.85	-1.54527338	Down	0	0
Acc14299	1025	578.57	97.8	-1.545168566	Down	2.11E-33	4.41E-33
Acc12926	2917	136	23	-1.544484303	Down	5.31E-09	4.25E-09
Acc01787	2115	674	114	-1.544298185	Down	1.34E-38	3.14E-38
Acc26438	2213	264.43	44.76	-1.543187339	Down	4.15E-16	4.93E-16
Acc05840	1805	5134.01	871	-1.5399249	Down	1.82E-280	2.62E-279
[truncated: 3,047 more rows]
