# Supplementary material for: Transcriptomic and Proteomic Profiling Reveal the Key Role of AcMYB16 in the Response of Pseudomonas syringae pv. actinidiae in Kiwifruit
Source: Front Plant Sci. 2021 Nov 11;12:756330. doi: 10.3389/fpls.2021.756330 (PMC8632638; doi:10.3389/fpls.2021.756330)
Supplement: Supplementary file 4 [file Table_3.XLSX]

## Sheet: Sheet1
Table S3 Protein profile analysis produced 8,067 proteins from the kiwifruit leaf libraries.
No.	Protein_ID	Description	Mass	Protein_Coverage	Uniq_Pep_Num	Uniq_Spec_Num	Sameset	Mean_Ratio_JK-VS-CK	Ratio_JK-VS-CK	SD_JK-VS-CK	Quant_Num_JK-VS-CK	Pvalue_JK-VS-CK	Protein_ID	Protein_Sequence	NCBInr Identity	NCBInr E-value	NCBInr Accession	NCBInr Description	Swissprot Identity	Swissprot E-value	Swissprot Accession	Swissprot Description	Protein_or_Domain	KOG Score	KOG E-value	KOG ID	KOG Function-Description	KOG Code	KOG Function-Categories	KEGG(ko_id|rank|evalue|score|subject_id|ko_definition)	GO Biological_Process	GO Molecular_Function	GO Cellular_Component
28	PSS04296.1	Serine/threonine-protein kinase [Actinidia chinensis var. chinensis]	123220	0.013	1	1	-	0.79	0.706|0.812|0.847|0.823|0.938|0.965|0.609|0.675|0.703	0.121	9	0.001287	PSS04296.1	MDSPSTTPGSLPGSNDESPRLKFLCSFSGSILPRPQDGKLRYVGGETRILSVPRDITYEELMVKMRELYEGAAVLKYQQPDEDLDALVSVVNDDDVMNMMEEYDKLGSGDGFTKLRIFLFSNTDQDGGTHFVDGDERDTERRYVDALNSLNESTATGTLDETHVVQQYFNQISLESSLHNQRNYEIPISQFNLRHLTIPQMGSGHHQQMEPPWSPAYCSPRQPGNHDPRPPVEFPTSPSLSQHHGLFGEFSDKGLDRMSEEYGRQQLNHQPPYDHQPRLSDSVAWLPNGTVPCDNSGFPLHGHSVFDGSVCEQCRMTFQRNQTYPDSPWKHGEQQHFEQPNMVNGFHTVASPCAECVPNRETFLFNTDAKFHHAFYHREQNDPRIFYNETHNHERVWIL…	65.405	0	XP_010656817.1	PREDICTED: uncharacterized protein LOC100266729 isoform X1 [Vitis vinifera]	39.03	5e-50	sp|O22558|STY8_ARATH	Serine/threonine-protein kinase STY8 OS=Arabidopsis thaliana GN=STY8 PE=1 SV=2	At5g57610_2	547	0	KOG0192	Tyrosine kinase specific for activated (GTP-bound) p21cdc42Hs	T	Signal transduction mechanisms	K04422|1|7e-148|462|lja:Lj0g3v0190659.2|mitogen-activated protein kinase kinase kinase 13 [EC:2.7.11.25]	GO:0006468//protein phosphorylation;GO:0035556//intracellular signal transduction	GO:0004871//signal transducer activity;GO:0004672//protein kinase activity;GO:0005524//ATP binding	GO:0005737//cytoplasm
33	PSR90136.1	Ribonuclease [Actinidia chinensis var. chinensis]	7738.91	0.167	1	1	PSR86777.1	0.72	0.527|0.349|1.286|0.497|0.433|1.202|0.555|0.350|1.289	0.41	9	0.03393	PSR90136.1	MSRHRRQASQVLPPEIISGDKPLGTTNSNPQGDAGVSGDGTGSGTSVTTDKSTVKQDASLPPPPAAGKKPPAGRPTGS	53.659	9e-12	XP_010651515.1	PREDICTED: uncharacterized protein LOC104879645 [Vitis vinifera]	-	-	-	-	-	-	-	-	-	-	-	-	-	-	-
42	PSS07645.1	SWI/SNF complex subunit SWI3A like [Actinidia chinensis var. chinensis]	63575.5	0.028	2	2	-	0.82	0.965|0.751|0.776|0.946|0.738|0.748|0.962|0.724|0.757	0.105	9	0.001059	PSS07645.1	METPSQDPSLKPPLPADVPQLHLYTIPSHSSWFSWDDIHDTEKSHLREFFDGSSFTRSPKIYRDYRDFIISKFREDPSRRLTFTEVRKSLVGDISVLHKVFAFLERCGLINFCAPGGEDPGEEGNWRVRVEDGAPNGVRVVAAPNSLKPVTVPPGGSDNGRGVVGNGFDLPPLASYRDVYSERKGTICGNCKQRCESGHYVCTKEGSFIICVKCFKNGHYGENKSVDDFKFIDCILNSGNHEAVWTEAETLLLLESVLKHGDNWDLVAENVKTKTKADCISKLIELPFGDLMLGSTHRRGRLWDNDGNMSIVQQVQLPSSETHSQENIKTEDQCHDVEKESNQNGDAETQVLPLKRKRTISPSNTGNALMKQVALISSMVGPHITASAAEAAVTALCDE…	66.306	0	XP_010663771.1	PREDICTED: SWI/SNF complex subunit SWI3A isoform X1 [Vitis vinifera]	47.33	9e-141	sp|Q8W475|SWI3A_ARATH	SWI/SNF complex subunit SWI3A OS=Arabidopsis thaliana GN=SWI3A PE=1 SV=1	At2g47620	295	5e-94	KOG1279	Chromatin remodeling factor subunit and related transcription factors	B	Chromatin structure and dynamics	K11649|1|0.0|664|vvi:100250960|SWI/SNF related-matrix-associated actin-dependent regulator of chromatin subfamily C		GO:0003677//DNA binding	GO:0005634//nucleus
61	PSS23712.1	Aquaporin PIP2-5 like [Actinidia chinensis var. chinensis]	30460.7	0.042	1	2	-	0.82	0.934|1.003|0.784|0.787|0.862|0.650|0.822|0.870|0.679	0.113	9	0.002255	PSS23712.1	MAKDINVGGGEYATKDYQDPPPAPLVDAEELTQWSFYRAIIAEFIATLLFLYITVLTVIGYKSQTDPAKNSDECGGVGILGIAWAFGGMIFVLVYCTAGISGGHINPAVTFGLFLARKVTLARAVMYMVAQSLGAICGCALVKAFQKNYYVKYGGGANELSAGYSTGTGLAAEIIGTFVLVYTVFSATDPKRNARDSHVPVLAPLPIGFAVFMVHLATIPITGTGINPARSFGATVIYGKDKAWDDQWIFWVGPFIGATIAAFYHQYILRAGAVKALGSFRSSA	89.825	0	NP_001311701.1	aquaporin PIP2-1-like [Nicotiana tabacum]	81.66	1e-171	sp|Q9ATM6|PIP24_MAIZE	Aquaporin PIP2-4 OS=Zea mays GN=PIP2-4 PE=1 SV=1	At3g54820	475	3e-171	KOG0223	Aquaporin (major intrinsic protein family)	G	Carbohydrate transport and metabolism	K09872|1|0.0|522|nto:104107754|aquaporin PIP		GO:0005215//transporter activity	GO:0016021//integral component of membrane
67	PSS33376.1	Caffeoylshikimate esterase, partial [Actinidia chinensis var. chinensis]	36531.4	0.056	1	1	-	0.45	0.795|0.790|0.452|0.100|0.219|0.100|0.628|0.610|0.349	0.274	9	0.005175	PSS33376.1	AYEIEGVKYEEEFVLNSRGMKLFTCRWLPANCERKALIFLCHGYGMECSISMKGTGIRLAKAGFGVYGMDYEGHGKSAGLQGLVPNFDDVVTDCSDHYTSICERKENMKKLRIVLGESMGGAVALLLHRKKPTFWDGAVLVAPMCKIADDMKPHPVVVSVLTKLCRIIPTWKIIPTQDIVDVAFRDPEVRQEIRSNPYCYKGRPRLLTGNQLLQVSLDLEQRLKEVSVPFLVVHGGDDKVTDPSVSKLLYESAESKDKTFKLYPGMWHSLTYGELPENIDTMFSDATAWLDERVEIRNSRLELEQKLENDEFHKGNSST	75.71	0	XP_009775188.1	PREDICTED: caffeoylshikimate esterase-like [Nicotiana sylvestris]	33.98	3e-56	sp|Q9C942|CSE_ARATH	Caffeoylshikimate esterase OS=Arabidopsis thaliana GN=CSE PE=1 SV=1	At2g39420	451	1e-160	KOG1455	Lysophospholipase	I	Lipid transport and metabolism	K01054|1|0.0|522|nsy:104225114|acylglycerol lipase [EC:3.1.1.23]	GO:0006629//lipid metabolic process	GO:0016298//lipase activity	GO:0016020//membrane
84	PSR84843.1	2-methylene-furan-3-one reductase [Actinidia chinensis var. chinensis]	40512.5	0.573	18	48	-	0.82	0.998|0.970|0.722|0.907|0.862|0.664|0.866|0.840|0.593	0.138	9	0.007973	PSR84843.1	MEAMLSSTSLQLRPLPPHSLSPLSLSRLQLPRGRTPINCFQKTSQSPVLPLRIYASSQTAPASTAAATSSSIPSQMKAWVYGDYGGVDVLKFDSSVSVPTVKDDEVLIRVFAAALNPVDFKRRQGKFKASDSPLPTVPGYDVSGVVVKVGTQVKSLKEGDEVYGNINEKALDGPKQFGSLAEFTAVEEKLLALKPKNLDFAEAAGLPLAIQTAYEGLERSGFSSGKSVLVLGGAGGVGSLVIQLAKHVFGASRVAATSSTGKLEILKSLGADLAVDYTKESFEDLPEKFDVVYDTVGQGDKAVKVVKEGGSVVVLTGAVTPPGFRFVVTASGAVLEKLNPFLESGKVKPVVDSKGPFPFAKVVEAFSYVETNRATGKVVIHPIP	78.811	0	XP_018815084.1	PREDICTED: 2-methylene-furan-3-one reductase-like [Juglans regia]	76.92	0	sp|K4BW79|ENOX_SOLLC	2-methylene-furan-3-one reductase OS=Solanum lycopersicum GN=EO PE=1 SV=1	At1g23740	511	0	KOG1198	Zinc-binding oxidoreductase	CR	Energy production and conversion;General function prediction only	K18980|1|0.0|583|jre:108986779|2-methylene-furan-3-one reductase [EC:1.3.1.105]		GO:0008270//zinc ion binding;GO:0016491//oxidoreductase activity	-
117	PSR91751.1	Abscisic acid receptor like [Actinidia chinensis var. chinensis]	14750.3	0.125	1	1	-	0.81	0.881|0.696|0.656|0.824|0.749|0.653|0.990|0.940|0.884	0.125	9	0.002646	PSR91751.1	MDPNQVPQGLTLEEYNHLKPVISTYHILDEMSNTCTSLITQRIDAPVEAVWPLVRQFDTPQRYKHFIKSCTMSGDGGVGSIREVTVVSGIPASTSTERLEILDDERHILSFRVVGGEHRLNNYRWEHW	78.862	7e-71	KVH89911.1	Polyketide cyclase/dehydrase [Cynara cardunculus var. scolymus]	64	8e-55	sp|O80992|PYL2_ARATH	Abscisic acid receptor PYL2 OS=Arabidopsis thaliana GN=PYL2 PE=1 SV=1	-	-	-	-	-	-	-	K14496|1|1e-71|216|ccav:112521839|abscisic acid receptor PYR/PYL family	-	-	-
120	PSR87602.1	Alpha-dioxygenase [Actinidia chinensis var. chinensis]	72534.6	0.345	5	7	-	0.71	0.862|0.598|0.606|0.775|0.573|0.538|0.951|0.724|0.742	0.141	9	0.0005339	PSR87602.1	MAALIATFYRFIHKDFHEVVKKMTLSDKLLFLIMHFIDKMGIWHWLPVILGLVYLLIRRHLHREYNLINVGNTPVGIRFNPVDYPYRTADGKYNDPFNETGTSEGTFFGRNILPVDQKDKPDPMVVATKLLSRRKFIDTGKQFNIIATSWIQFMIHDWVDHLEDTNQIELSAPREVANQCPLQSFKFFKTKEVPTGFYEIKSGHLNIRTPWWDGSVIYGSNKERLGKVRTFQDGKLKISKDGLLLHDQDGIPVSGDTRNGWAGLSTLQALFVKEHNAVCDALKKEYPELDDEQLYRHARLVTSAVLAKIHTIDWTVELLKTDMLFAGMRGNWYGLLGKKFKDMFGHVGISVLSGLVGQKKPQNHGVPYSLTEEFTSVYRMHALLPDHLLLRDITAAPGP…	79.1	0	XP_012082034.1	alpha-dioxygenase 1 [Jatropha curcas]	72.13	0	sp|Q9SGH6|DOX1_ARATH	Alpha-dioxygenase 1 OS=Arabidopsis thaliana GN=DOX1 PE=1 SV=1	At3g01420	951	0	KOG2408	Peroxidase/oxygenase	R	General function prediction only	K10529|1|0.0|1051|jcu:105641982|alpha-dioxygenase [EC:1.-.-.-]	-	-	-
133	PSS24542.1	Aspartate-semialdehyde dehydrogenase [Actinidia chinensis var. chinensis]	34914.9	0.056	2	3	-	0.8	0.859|0.778|1.000|0.741|0.699|0.852|0.755|0.662|0.866	0.104	9	0.0006417	PSS24542.1	MALPLALPPLSHPLTPPLKSLCCRCSATSLQDNFSSSQLTTTNYRPAVILPGLGNNKSDYEKLEVTLKGHGVPTVVAKVSRIDWLRNAAGLADPNYWRGTLRPRPVLDWKKIILMSHNQADFIVGGTLSIIGHSAGGWLARVYMEEFGLSHISLLLTLGTPHLPPPKGSPGVIDQTRGLLNYVEKHCSKAVYTPELRYVCIAGRYIQGARFFAGSNANSSSAVHVDQADSEVAVVNATSTSASDSATLRARFIGQGYKQVCGQADVWGDGVVPEVAAHLEGALNISFDRVYHSPVGSDDALRPWYGSPAIVEQWIHHLLN	68.634	1e-156	XP_002273572.1	PREDICTED: uncharacterized protein LOC100248966 isoform X1 [Vitis vinifera]	-	-	-	-	-	-	-	-	-	-	-	-		GO:0016788//hydrolase activity, acting on ester bonds	-
160	PSR96171.1	Glyoxylate/succinic semialdehyde reductase [Actinidia chinensis var. chinensis]	29985.1	0.244	4	15	-	0.83	0.855|0.766|0.796|0.850|0.773|0.736|0.954|0.847|0.879	0.067	9	0.000101	PSR96171.1	MAMSFVKAIYTCSLSTSIFNSPPTKAMAMSSSFCNRTPNHFSGRPISSFPTKPTFSLSFKAFCSQTSASTAKADEMPVRIGFLGLGIMGSPMAQNLIKAGCDLTVWNRTKNKCDPLISLGANSGDKPLFETAAPFLDIMGKSRFFLGDVGNGAAMKLVVNMIMGSMMASFSEGLLLSEKVGLDPSVLVEVVSQGAISAPMFSMKGPSMVQSLYPTAFPLKHQQKDLRLALGLAESVSQPTPIAAAANEMYKVAKSRGLSDQDFSAVIEALKVKLQNQSD	66.323	1e-130	XP_016900383.1	PREDICTED: glyoxylate/succinic semialdehyde reductase 2, chloroplastic isoform X3 [Cucumis melo]	85.33	8e-89	sp|F4I907|GLYR2_ARATH	Glyoxylate/succinic semialdehyde reductase 2, chloroplastic OS=Arabidopsis thaliana GN=GLYR2 PE=1 SV=1	At1g17650	271	4e-86	KOG0409	Predicted dehydrogenase	R	General function prediction only	K18121|1|1e-95|290|oeu:111406258|glyoxylate/succinic semialdehyde reductase [EC:1.1.1.79 1.1.1.-]		GO:0051287//NAD binding;GO:0004616//phosphogluconate dehydrogenase (decarboxylating) activity	-
177	PSR91613.1	Plastid lipid-associated protein [Actinidia chinensis var. chinensis]	52540.9	0.09	2	6	-	0.77	0.740|0.917|0.603|0.701|0.797|0.559|0.830|1.054|0.756	0.152	9	0.00299	PSR91613.1	MALLLTSPPSLSSQTPKSSLLFSLLRPSKTHSLSSSLLSKTPKFPTLRRSAATTGGDSSPNDGVPAGVSDEWGEKWEEPETEPPTKLPDVDPPKDEDEWGVSSGRKPAVVVDEWGERAEPETDPPTRLSGADPATDEDEWGTVRVGFGDDYGNGSAGGAEVVDDKLMELKRCLVDTVYGSDLGFRASEEVRAEVLELVSQLEAANPTPAPTEATEVLDGNWVLVYTAFSELLPLLAAGATPLFKVKQICQAINTSSLTIENSTTLSGPFGSFSFSASAAFEVRTPTRIQVEFKEGTLQPPEIKSSIDLPKNVDIFGQKITYTAFSELLPLLAAGATPLFKVKQICQAINTSSLTIENSTTLSGPFGSFSFSASAAFEVRTPTRIQVEFKEGTLQPPEIK…	53.687	3e-101	XP_010276838.1	PREDICTED: probable plastid-lipid-associated protein 3, chloroplastic [Nelumbo nucifera]	52.61	8e-89	sp|Q94KU5|PAP3_BRACM	Plastid lipid-associated protein 3, chloroplastic OS=Brassica campestris GN=PAP3 PE=2 SV=1	-	-	-	-	-	-	-	-			GO:0009535//chloroplast thylakoid membrane;GO:0010287//plastoglobule
199	PSS24867.1	Myosin-2 like [Actinidia chinensis var. chinensis]	39325.1	0.275	9	19	-	0.74	0.722|0.628|0.643|0.780|0.695|0.680|0.941|0.805|0.793	0.098	9	9.734e-05	PSS24867.1	MEVGKLVFLEDLEKLRYLAELIYLQEVEAIQATIYYNNDDFIQSLTDSRTNYESVLKLVDTAVQLLETYPTNKVDKTTASAAKDFHDFIIYVSNYALQTMANYNSRLHYINEVTSYVESFVERMAHVQLHRDTLGNEMESIAIDAAISKSIPLQAAKSHQSDLSTTFSQTLKDSGIELHDLVQSHQARLGLEGPFEDLEPVQKARVYNEIIISSGREAILVDRIETVSKYGGAAWTMITIGFEVWDVFHSENKIEKTTYYAVKEVAQFGGAYLGGIVATAVATNVFELSPVYVTIAGIAGSIAGSFIVGTIVAALFGLIFSSGGEKVPYDVTSGHISYVQDLPDGAGLANRIAFHLS	34.971	8e-55	XP_009378339.1	PREDICTED: uncharacterized protein LOC103966850 [Pyrus x bretschneideri]	-	-	-	-	-	-	-	-	-	-	-	-			GO:0016021//integral component of membrane
209	PSR89234.1	Mitochondrial carnitine/acylcarnitine carrier-like protein [Actinidia chinensis var. chinensis]	30704.1	0.495	3	4	-	0.83	0.946|0.846|0.857|0.903|0.744|0.935|0.812|0.638|0.780	0.099	9	0.00161	PSR89234.1	MGDVAKDLISGTVGGAAQLIVGHPFDTIKVKLQSQPAPLPGQPPKFSGAMDAVRKTIASEGPRGLYKGMGAPLATVAAFNAVLFTVRGQMEALLRSEPGAPLTVNQQVVAGAGAGVAVSFLACPTELIKCRLQAQSALADSASASAVVKYGGPMDVAKQVLRSEGGVRGLFKGLFPTLAREVPGNAAMFGVYEALKQYLAGGKDTSELGRSSLIVAGGLAGASFWVSVYPTDVVKSVIQVDDYKNPKFSGSVDAFRKILASEGVKGLYKGFGPAMARSVPANAACFLAYEVTRSSLG	91.246	0	XP_018811469.1	PREDICTED: mitochondrial carnitine/acylcarnitine carrier-like protein [Juglans regia]	80.33	5e-178	sp|Q93XM7|MCAT_ARATH	Mitochondrial carnitine/acylcarnitine carrier-like protein OS=Arabidopsis thaliana GN=BOU PE=1 SV=1	At5g46800	481	2e-173	KOG0758	Mitochondrial carnitine-acylcarnitine carrier protein	C	Energy production and conversion	K15109|1|0.0|550|jre:108984095|solute carrier family 25 (mitochondrial carnitine/acylcarnitine transporter), member 20/29	GO:0006810//transport		GO:0016021//integral component of membrane
243	PSR91727.1	Carotenoid cleavage dioxygenase [Actinidia chinensis var. chinensis]	71923.7	0.046	1	1	-	0.83	1.116|0.876|0.631|1.025|0.808|0.565|1.044|0.801|0.576	0.207	9	0.03473	PSR91727.1	MKKKIISRRKLGINLIWMYDLYYTEGTELCSLFKARASSCLFYVLSAASIFAEKTVMEALSSSILSSFSLSNIFITPPPKKPPLLRISAVRIEEKPPTSTTTTKRTSQVPSKKTSPSIPSTPQKPTSKRSPPPPSRPPPPSVAATILNAFDGLINTFIDPPVRQSVDPRHVLADNFAPVGELPPTPCTLVHGALPPCLDGGAYIRNGPNPQFLPRGPYHLFDGDGMLHAVKISVEGATLCSRFVKTYKYTIEKQTGAPVIPNVFSGFNGLTAAAARGAITAARALAGQFNPTQGIGLANTSLALIGNNLYALGESDLPYAVKISDDGDIVTEGRCDFGGKLFVSMTAHPKKDPDTGELFAFRYGPIPPFLTFFRFDDAGNKMPDVPIFSMTTPSLLHDF…	76.491	0	BAT32880.1	carotenoid cleavage dioxygenase 4 [Rhododendron japonicum f. flavum]	68.17	0	sp|O49675|CCD4_ARATH	Probable carotenoid cleavage dioxygenase 4, chloroplastic OS=Arabidopsis thaliana GN=CCD4 PE=1 SV=1	At4g19170	814	0	KOG1285	Beta, beta-carotene 15,15'-dioxygenase and related enzymes	Q	Secondary metabolites biosynthesis, transport and catabolism	K09840|1|0.0|878|nta:107791323|9-cis-epoxycarotenoid dioxygenase [EC:1.13.11.51]		GO:0046872//metal ion binding;GO:0016702//oxidoreductase activity, acting on single donors with incorporation of molecular oxygen, incorporation of two atoms of oxygen	-
271	PSS35128.1	Vesicle transport v-SNARE like [Actinidia chinensis var. chinensis]	22960.1	0.233	1	1	-	0.8	0.830|0.806|0.805|0.918|0.890|0.868|0.719|0.675|0.674	0.091	9	0.0003299	PSS35128.1	MSEVFEGYERQYCELSANLSKKCTSASLLDGGIRKMDLEARSLQPNVKAVLLAKLREYKSDMNNLKAEVKRITSTNLNQAARDELLESGMADAMTVSADQRGRLLMSTERINKSSDRVRESRRTMLETEELGVSILQDLHQQRQSLLHAHNTLHGVDDNIGRSKKILTNMSRRMSKNKWIIGSIITVLVIVIALILYFKLAK	80.365	1e-123	XP_012856922.1	PREDICTED: vesicle transport v-SNARE 13-like [Erythranthe guttata]	66.97	2e-106	sp|Q9LVP9|VTI13_ARATH	Vesicle transport v-SNARE 13 OS=Arabidopsis thaliana GN=VTI13 PE=2 SV=1	At3g29100	305	4e-106	KOG1666	V-SNARE	U	Intracellular trafficking, secretion, and vesicular transport	K08493|1|2e-125|356|ccav:112515321|vesicle transport through interaction with t-SNAREs 1	GO:0006891//intra-Golgi vesicle-mediated transport;GO:0006888//ER to Golgi vesicle-mediated transport;GO:0006896//Golgi to vacuole transport;GO:0006623//protein targeting to vacuole;GO:0048280//vesicle fusion with Golgi apparatus;GO:0042147//retrograde transport, endosome to Golgi;GO:0006886//intracellular protein transport;GO:0016192//vesicle-mediated transport	GO:0000149//SNARE binding;GO:0005484//SNAP receptor activity	GO:0005794//Golgi apparatus;GO:0016021//integral component of membrane;GO:0012507//ER to Golgi transport vesicle membrane;GO:0031902//late endosome membrane;GO:0031201//SNARE complex;GO:0005789//endoplasmic reticulum membrane;GO:0005829//cytosol
277	PSS26165.1	Sphingolipid transporter spinster like [Actinidia chinensis var. chinensis]	56140.5	0.027	1	1	-	0.79	0.726|0.682|0.622|0.857|0.812|0.721|0.982|0.916|0.834	0.116	9	0.001233	PSS26165.1	MATISNALSASNPSWFTPKRLLAIFCVINLLNYLDRGAIASNGVNGSRATCTKSGTCTSGKGIQGDFNLNNFEDGVLSSAFMVGLLVASPIFASLAKSVNPFRLIGVGLSVWTFATAGCGFSFDFWSITICRMLVGVGEASFISLAAPFIDDNAPRAQKTAWLGIFYMCIPAGIALGYVYGGLVGGYSNWRFAFFGEAILMLPFAVLGFVMKPLQLKGFTPADSKKAFTAIETAISEVQDDSTSKGGMPSMKEELVDQSSKGPSKSKCGSIYLDQLSRFLKDIKVLLLEKVYVVNVLGYIAYNFVIGAYSYWGPKAGYNIYHMNNADMIFGGITIVCGILGTVAGGYVLDKMTSTISNAFKLLSVATFFGAVFCFTAFCFKSLYVFLALFAIGELLVFA…	80.739	0	XP_017971850.1	PREDICTED: probable sphingolipid transporter spinster homolog 2 isoform X2 [Theobroma cacao]	70.82	0	sp|Q9FLG8|SPNS2_ARATH	Probable sphingolipid transporter spinster homolog 2 OS=Arabidopsis thaliana GN=At5g64500 PE=2 SV=1	At5g64500	678	0	KOG1330	Sugar transporter/spinster transmembrane protein	G	Carbohydrate transport and metabolism	-	GO:0055085//transmembrane transport		GO:0016021//integral component of membrane
281	PSR86405.1	Aminopyrimidine aminohydrolase [Actinidia chinensis var. chinensis]	63999.2	0.021	1	1	PSR92802.1	0.76	0.954|0.760|0.770|0.863|0.693|0.678|0.841|0.650|0.657	0.105	9	0.0002574	PSR86405.1	MGMVAASASAVGGEEGGIARRLWIKFRDESVFALYTPFVVCLASGVLDPQSFVHCISQDVYFLQAFAHAYELAEEYADDDDDKIAIRKLRKRVLKKLNNHDETVREWGFELPSDSISDNATVKYTDFLLATASGKVEGEKFRVKIATPFEKTKLAAYTLAAIGPCLRLYAFISKEILALEDPDQSNHIYKKWVDSLSSQNFEEAALQIDDLLDRLTVSLTGEELNIIEKLYQQAMKLEVKFFSDQPILQQTIVPFSQPHDPAESNLSIFCDFDMTCTAIDSSDLLAEIAIRTAPKTDMNECETQLPQMSSADLRTTWGVLSSQYTEEYEQCVESIMAIEKVEEFNYEGLCRALEQLSSFEKRANSRLIQSGVLKGLNVEEIKRAGEHLILQDGCKGFFQ…	69.435	0	XP_010264845.1	PREDICTED: probable aminopyrimidine aminohydrolase, mitochondrial [Nelumbo nucifera]	58.58	0	sp|F4KFT7|TENAC_ARATH	Bifunctional TH2 protein, mitochondrial OS=Arabidopsis thaliana GN=TH2 PE=1 SV=1	-	-	-	-	-	-	-	K22911|1|0.0|803|nnu:104602750|thiamine phosphate phosphatase / amino-HMP aminohydrolase [EC:3.1.3.100 3.5.99.-]		GO:0016787//hydrolase activity	-
294	PSR86094.1	Chlorophyllase-2 like [Actinidia chinensis var. chinensis]	33741.8	0.095	2	3	-	0.62	0.696|0.441|0.611|0.585|0.409|0.505|0.932|0.612|0.827	0.172	9	0.0005317	PSR86094.1	MAQVVAEPSRVTEITNIFEEGKFIVKCITVEKSHPSSPPKPLLIITPTTPGKYPLLLFFHGFWIHNTSYTCFLHHISSHGFIVVAPQLYTSTFTSGTAELESSAAVTSWLYTCGLHSTLPQDVEPDLLKVAVSCHSRGGKTAFALALGHAQSSLKFSLLLGLDPVEGTDPNILTNCPRSFDLSIPVAVIGTGLGDRHKFGVLPACAPDGRNYEEFFAECKPPCWFFYAKDYGHMDMMDDGTELLTSCSCVSGKGPKQPFRRCLGGIFVAVLRAYLEGDSEDLQDIVDYPSNAPTPLDPIIHIEA	60.897	1e-117	APO15138.1	chlorophyllase-1 [Camellia sinensis]	43.92	3e-75	sp|Q9M7I7|CLH2_ARATH	Chlorophyllase-2, chloroplastic OS=Arabidopsis thaliana GN=CLH2 PE=1 SV=1	-	-	-	-	-	-	-	K08099|1|7e-114|335|vvi:100243499|chlorophyllase [EC:3.1.1.14]	GO:0015996//chlorophyll catabolic process;GO:0050832//defense response to fungus;GO:0042742//defense response to bacterium	GO:0047746//chlorophyllase activity	GO:0005773//vacuole
300	PSS19244.1	Thioredoxin domain-containing protein, partial [Actinidia chinensis var. chinensis]	23503.1	0.132	1	1	-	0.82	1.077|0.975|0.970|0.893|0.830|0.812|0.668|0.601|0.597	0.173	9	0.01862	PSS19244.1	IIEKQVLTVAKAVEDKIDDEIAALDRLDLDDIEVLRERRLQQMKKMAEKRSRWMALGHGEYSEIFAEKDFFSVVKASERVVCHFYRENWPCKVMDKHLSILAKQHMETRFVKIQAEKSPFLAEKLKIVVLPTLALIKNTKVDNYLVGFDELGGTDEFSTEELEERLAKAQVITYEGESSLNPSRSSAKTRSVRQSTSSYSSDSE	88.235	4e-131	XP_022145711.1	thioredoxin domain-containing protein 9 homolog [Momordica charantia]	80	9e-120	sp|O64628|TXND9_ARATH	Thioredoxin domain-containing protein 9 homolog OS=Arabidopsis thaliana GN=At2g18990 PE=2 SV=1	At3g25580	342	7e-121	KOG1672	ATP binding protein	OC	Posttranslational modification, protein turnover, chaperones;Energy production and conversion	K03671|1|9e-07|50.8|cann:107848409|thioredoxin 1	GO:0008616//queuosine biosynthetic process;GO:0045454//cell redox homeostasis		GO:0005737//cytoplasm;GO:0005623//cell
319	PSS19155.1	Guanine nucleotide-binding protein subunit beta-2 like [Actinidia chinensis var. chinensis]	41664.5	0.061	1	1	-	0.77	0.877|1.012|1.398|0.574|0.670|0.889|0.411|0.451|0.621	0.312	9	0.03442	PSS19155.1	MSVAELKERHVAATETVNALREQLKHRRLLLLDTDVAGYARSQGKTPVSLGPTDLVCCRTLQGHTGKVYSLDWTPEKNRIVSASKDGRLIVWNALTSQKIHAIKLPCAWVMTCAFSPTGQSVACGGLDSVCSIFSLNSPTDKDGNLPVARMLSGHKGYVSCCQYVPDEDTHLITSSGDHTCILWDITTGLRTSVFGGEFQSGHTSDVLSVSISGSNSRMFVSGSCDGTARLWDTRVASRAVRTFHGHEADVNAVKFFPDGNRFGTGSDDGTCRLFDIRTGHQLQVYYQQRGDNDVPPVNSIAFSISGRLLFAGYSNGDCYVWDTLLAEVVLNLGSLQNSHEARISCLGLSADGSALCTGSWDTNLKIWAFGGYRRVV	91.512	0	XP_018847841.1	PREDICTED: guanine nucleotide-binding protein subunit beta-2 [Juglans regia]	87.27	0	sp|P93398|GBB2_TOBAC	Guanine nucleotide-binding protein subunit beta-2 OS=Nicotiana tabacum PE=2 SV=1	At4g34460	617	0	KOG0286	G-protein beta subunit	R	General function prediction only	K04536|1|0.0|715|jre:109011193|guanine nucleotide-binding protein G(I)/G(S)/G(T) subunit beta-1	GO:0007165//signal transduction	-	-
327	PSR88016.1	hypothetical protein CEY00_Acc33760 [Actinidia chinensis var. chinensis]	17079.1	0.21	3	3	-	0.76	0.958|0.721|0.666|0.912|0.694|0.620|0.927|0.684|0.631	0.135	9	0.0009691	PSR88016.1	MASTSFHSLQTLSLRRVHNAPPTSCKAHNPNPKPVSRTASIPGRRQCLLLLTAGTALKAAELPSRAEDIGLFGLRKKLQKVEEEAEEVIKEGIESAEKGILTAEKGIVTAEKEIETAEREIEAAVSFGGLAQAAAVVGAEFVGVLVATSVVNGILGPEGQKS	61.988	6e-57	CDP02435.1	unnamed protein product [Coffea canephora]	-	-	-	-	-	-	-	-	-	-	-	-	-	-	-
401	PSS28721.1	Myb-related protein like [Actinidia chinensis var. chinensis]	54999.1	0.012	1	1	-	0.82	0.853|0.728|0.763|0.747|0.658|0.655|1.071|0.911|0.953	0.142	9	0.004974	PSS28721.1	MENMKKKGDNNSEVPKQKERHIVSWSQEEDDILREQIRIHGTENWAIIASNFKDKTTRQCRRRWYTYLNSDFKKGGWSPEEDMLLCEAQKIFGNRWTEIAKVVSGRTDNAVKNRFTTLCKKRAKHEALAKENNNTSYINSNNKWVVFGDGFNIAEMPETASSLKKMRRTHISELTEECNSGEKLTGEFGTTTNQQLRPPFAVLMQNFQNVGNLPTQQQIKNTKETTNDEGASNNKIQGTFLKKDDPRILALMQQAELLSSLAVKVNTENTNQSLENAWKVLRDFLNQSKESDMLGIKISDIEFQFENFKDLIEDIRSSNEGSRTSWRQPDLYEDSPGSSEYSTGSTLLSLQAGDKTEQSQSELCGLHQDIVVESQSTHIGNQNGIGDCENRLLSSATRP…	72.822	0	XP_010652303.1	PREDICTED: uncharacterized protein LOC100246639 isoform X2 [Vitis vinifera]	58.3	0	sp|F4IRB4|MYB88_ARATH	Transcription factor MYB88 OS=Arabidopsis thaliana GN=MYB88 PE=1 SV=1	At2g02820	466	6e-162	KOG0048	Transcription factor, Myb superfamily	K	Transcription	K09422|1|0.0|690|vvi:100246639|transcription factor MYB, plant	GO:0030154//cell differentiation;GO:0006357//regulation of transcription from RNA polymerase II promoter	GO:0043565//sequence-specific DNA binding;GO:0044212//transcription regulatory region DNA binding;GO:0001135//transcription factor activity, RNA polymerase II transcription factor recruiting;GO:0003677//DNA binding;GO:0000981//RNA polymerase II transcription factor activity, sequence-specific DNA binding	GO:0005634//nucleus
405	PSS17980.1	Thioredoxin-like protein [Actinidia chinensis var. chinensis]	33887.3	0.523	2	8	-	0.83	0.827|0.844|0.772|0.845|0.864|0.788|0.828|0.887|0.803	0.037	9	1.296e-06	PSS17980.1	MATTITNFLPKPPPHLASPTKLNPFNPYSSSYQLPNFFRKPLQAKPQTSHKLFVPRATAASKTKKAASDERVLQVHSVEEFDEALRTAKNKLVVVEYAASHSLQSSKIYPFMVDLSRTCSDVEFLLVMGDESEKTRELCKREKIDKVPHFSFYKSMEKIHEEEGIGPDQLVGDVLYYGDNHSAVVQLHSGEDVERLIDDHKVDQKLIVLDVGLKHCGPCVKVYPTVIKLSKQMTDTVVFARMNGDENDSCMKFLKDMNVVEVPTFLFIRDGEICGRYVGSGKGELIGEILRYQGVRVT	79.333	2e-168	OMO75465.1	Thioredoxin [Corchorus olitorius]	68.46	3e-145	sp|Q9SGS4|CDSP_ARATH	Thioredoxin-like protein CDSP32, chloroplastic OS=Arabidopsis thaliana GN=CDSP32 PE=1 SV=1	At1g76080	410	5e-145	KOG0907	Thioredoxin	O	Posttranslational modification, protein turnover, chaperones	K03671|1|6e-16|76.6|lsv:111897912|thioredoxin 1!K04733|2|1e-14|79.0|hbr:110664111|interleukin-1 receptor-associated kinase 4 [EC:2.7.11.1]	GO:0045454//cell redox homeostasis;GO:0006662//glycerol ether metabolic process;GO:0034599//cellular response to oxidative stress	GO:0047134//protein-disulfide reductase activity;GO:0016671//oxidoreductase activity, acting on a sulfur group of donors, disulfide as acceptor;GO:0015035//protein disulfide oxidoreductase activity;GO:0004791//thioredoxin-disulfide reductase activity	GO:0005737//cytoplasm;GO:0005623//cell
406	PSR93051.1	Protein IN2-1 B like, partial [Actinidia chinensis var. chinensis]	35232.8	0.429	6	10	-	0.73	0.706|0.765|0.680|0.812|0.909|0.755|0.675|0.712|0.584	0.092	9	6.265e-05	PSR93051.1	MPALTVSDPSYCSTKITAYWSTFKSSPTLSLCSVSLSTNPSPFPHIRAFSLHTQLPSCVLRALLPKSRSRTKVSASSMATGVQEVRPPSLDSTSDPPAIFDGTTRLYISYACPYAQRVWITRNCKGLQDKIKLVPIDLQNRPTWYKEKVYPPNKVPSLEHNNEVKGESLDLVKYIDSNFEGPSLFPSDPDKRQFAEELLAYTDSFNKGVITSFKADGMNDADAAFDYIETALSKFEDGPFFLGQFSLVDIAYAPFIERFQPFLLDVKKYDITAGRPKLATWIEEMNKNEAYKQTSLEPEEYVATYKKRFL	67.732	1e-142	XP_002281575.1	PREDICTED: glutathione S-transferase L3 [Vitis vinifera]	68.12	3e-111	sp|Q8H8U5|IN21B_ORYSJ	Protein IN2-1 homolog B OS=Oryza sativa subsp. japonica GN=GSTZ5 PE=2 SV=1	At3g55040	323	2e-110	KOG0406	Glutathione S-transferase	O	Posttranslational modification, protein turnover, chaperones	K00799|1|2e-143|410|vvi:100267329|glutathione S-transferase [EC:2.5.1.18]	-	-	-
413	PSS04166.1	Phospholipid hydroperoxide glutathione peroxidase [Actinidia chinensis var. chinensis]	12840.2	0.292	2	6	-	0.79	0.858|0.789|0.773|0.782|0.724|0.696|0.887|0.832|0.813	0.061	9	1.845e-05	PSS04166.1	MASQSQNPQSVHEFTVKDARGNDVDLSMYKGKALLIVNVASQCGLTDSNYTELSKIYEKYKDQGLEILAFPCNQFGGQEPGNNEQIMEFACTRFKAEYPIFDKVHIANNPLLQ	86.792	1e-65	XP_011072526.1	probable phospholipid hydroperoxide glutathione peroxidase isoform X2 [Sesamum indicum]	81.31	8e-63	sp|Q9LEF0|GPX4_MESCR	Probable phospholipid hydroperoxide glutathione peroxidase OS=Mesembryanthemum crystallinum GN=GPXMC1 PE=2 SV=1	At4g11600	177	3e-58	KOG1651	Glutathione peroxidase	O	Posttranslational modification, protein turnover, chaperones	K00432|1|6e-66|202|sind:105157750|glutathione peroxidase [EC:1.11.1.9]	GO:0006979//response to oxidative stress	GO:0004602//glutathione peroxidase activity	-
447	PSS01568.1	Glucan endo-1,3-beta-glucosidase [Actinidia chinensis var. chinensis]	54057	0.249	6	8	-	0.82	0.741|0.857|0.891|0.771|0.866|0.909|0.712|0.829|0.831	0.068	9	0.0001072	PSS01568.1	MGLFPVGIGLRIVSVLISWLLMMESVSVSGLGANWGTQASHPLPPDTVVTMLRENRFQKVKLFDADYDSLRALGKSGIEVMVGIPNDMLLSIATSLKAAEKWVSKNVSTHINTNHVNIRYVAVGNEPFLKTYNGSFLRTTFPALQNIQSALIKAGLGNQVKVTVPLNADVYESSTGFPSGGDFRADIHDFLLAIVKFLSDNGAPFTVNIYPFISLYIDPNFPVEYAFFDGNASPINDGGTNYYNMFDANHDTLVWALQKNGFGNLPIIVGEIGWPTDGDRNANLAYAQRFNQGFMSHISGGKGTPMRPGPIDAYMFSLIDEDAKSIDPGNFERHWGIFFYDGSPKYPLNLGTTNSGALIPARNVKYQEKKWCVMRPNAKLEDPQVAPSVSYACSLADCT…	82.083	0	XP_018833234.1	PREDICTED: glucan endo-1,3-beta-glucosidase 6 [Juglans regia]	77.21	0	sp|Q93Z08|E136_ARATH	Glucan endo-1,3-beta-glucosidase 6 OS=Arabidopsis thaliana GN=At5g58090 PE=1 SV=2	-	-	-	-	-	-	-	K19893|1|0.0|823|jre:109000719|glucan endo-1,3-beta-glucosidase 5/6 [EC:3.2.1.39]	-	-	-
464	PSS00304.1	Spermidine hydroxycinnamoyl transferase [Actinidia chinensis var. chinensis]	49347.5	0.148	5	6	-	0.81	0.921|0.800|0.952|0.927|0.685|0.782|0.812|0.634|0.752	0.11	9	0.001346	PSS00304.1	MVTLKASHEEKPAGDTPGGIMYIPELDQAIAITHAPTIYFYRLEKESEINAAKILKDSLGKALVVFYPLAGRLQYIDQGLRMELDCNSMGALFLEAESEAKIDDYEDFRPTPDIRALIPSVDYNKPIHELPLVLVQLTKFSCGGISVGLGISHVLADGLAAGHFISNWARIARGEQIDHIPFLDRTKLRPEESWAPSFDQPEFKPPPLLIGHSSNLEERKKKTTVAVLKLSESQIQELKKRANSTNSTFTRYEVVAAHVWRCACKARGHKSEQVTNMRFAVDFRNRVKPPLPKGYFGNAVLPTVAIATSGELVSKPLAYASGKIRQAKEKITNEYIRSSLAFLKNEPNLSRFRHLHIAGYTEGFFYGNPNIVITSWSIASLFGADFGWGKEIYFGPGTL…	61.384	0	AFD64619.1	putative hydroxycinnamoyl-CoA:shikimate/quinate hydroxycinnamoyltransferase [Camellia sinensis]	51.22	3e-165	sp|O64470|SHT_ARATH	Spermidine hydroxycinnamoyl transferase OS=Arabidopsis thaliana GN=SHT PE=1 SV=1	-	-	-	-	-	-	-	K13065|1|0.0|538|vvi:100246835|shikimate O-hydroxycinnamoyltransferase [EC:2.3.1.133]	GO:0080088//spermidine hydroxycinnamate conjugate biosynthetic process;GO:0010584//pollen exine formation	GO:0080073//spermidine:coumaroyl CoA N-acyltransferase activity;GO:0080072//spermidine:sinapoyl CoA N-acyltransferase activity;GO:0047672//anthranilate N-benzoyltransferase activity;GO:0080075//spermidine:feruloyl CoA N-acyltransferase activity;GO:0080074//spermidine:caffeoyl CoA N-acyltransferase activity;GO:0016747//transferase activity, transferring acyl groups other than amino-acyl groups	-
507	PSS33871.1	Stem-specific protein [Actinidia chinensis var. chinensis]	25688.1	0.481	3	8	-	0.75	0.694|0.693|0.625|0.831|0.801|0.818|0.876|0.737|0.707	0.082	9	4.77e-05	PSS33871.1	MLGVFSSSIVSPPDELVAAGCRTPSPKITASALVDRFLQTNPSGVSVQIGDHVQLAYTHHNESPLRPRSFAVKDEIFCLFEGALDNLGSLRQQYGLAKSANEVVLVIEAYKALRDRAPYPPNHVVGHLVGNFAFVVFDKSTSTLFVAADQFGKVPLYWGITADGYVAFANDADLLKGACGKSLASFPQGCFYSTTVGELRSYENPKNKITAVPATEEEIWGAKFMVEGTTVLAAATK	89.744	3e-158	XP_016668608.1	PREDICTED: stem-specific protein TSJT1-like [Gossypium hirsutum]	44.97	3e-40	sp|P24805|TSJT1_TOBAC	Stem-specific protein TSJT1 OS=Nicotiana tabacum GN=TSJT1 PE=2 SV=1	At5g65010	60.1	4e-10	KOG0571	Asparagine synthase (glutamine-hydrolyzing)	E	Amino acid transport and metabolism	K13783|1|2e-11|67.4|mdm:103409501|MFS transporter, OPA family, solute carrier family 37 (glycerol-3-phosphate transporter), member 1/2!K01953|2|1e-10|65.5|cmos:111463170|asparagine synthase (glutamine-hydrolysing) [EC:6.3.5.4]	-	-	-
521	PSS13417.1	Galacturonosyltransferase-like [Actinidia chinensis var. chinensis]	39219.1	0.029	1	1	-	0.81	0.952|0.774|0.873|0.701|0.724|0.703|0.833|0.830|0.934	0.095	9	0.000607	PSS13417.1	MPPNLHLLTTALLLLLSSVHFPLAIASGSLPPFREAPAFRNGRECPQHHDPSSTIHIAMTLDATYLRGSVAGVFSVLQHAACPENLSFHFLSTAHRRADLRRTILSTFPYLSFTLHDFDHNLVRNKISASVRRALDQPLNYARIYLADLLPASVRRIIYFDSDLIVVDDVAKLWSIDLKSHILGAPEYCHANFTSYFTPNFWSIPKFSSIFNNRNPCYFNTGVMVIDLEKWRQNRYTLKLEYWMKKQKEYRIYELGSLPPFLLVFAGNVKGVEHRWNQHGLGGDNLEGLCRDLHPGPVSLLHWSGKGKPWLRLDSKKPCPLDSLWAPYDLFHHEPLFSDS	78.852	0	XP_010265254.1	PREDICTED: probable galacturonosyltransferase-like 3 [Nelumbo nucifera]	73.93	2e-173	sp|Q0V7R1|GATL3_ARATH	Probable galacturonosyltransferase-like 3 OS=Arabidopsis thaliana GN=GATL3 PE=2 SV=1	Hs4758664	53.5	2e-07	KOG3765	Predicted glycosyltransferase	G	Carbohydrate transport and metabolism	K20893|1|3e-146|420|ccav:112511455|probable galacturonosyltransferase-like 1 [EC:2.4.1.-]	GO:0000271//polysaccharide biosynthetic process	GO:0016757//transferase activity, transferring glycosyl groups	GO:0005794//Golgi apparatus
527	PSR96312.1	Histone H2A.1 like [Actinidia chinensis var. chinensis]	13850.5	0.295	1	2	PSS16238.1;PSS06169.1	0.83	0.838|0.872|0.779|0.881|0.909|0.823|0.777|0.822|0.732	0.057	9	3.086e-05	PSR96312.1	MAGRGKTLGSGAAKKATSRSSKAGLQFPVGRIARFLKAGKYAERVGAGAPVYLAAVLEYLAAEVLELAGNAARDNKKTRIVPRHIQLAVRNDEELSKLLGDVTIANGGVMPNIHNLLLPKKTGSSKPTADED	98.485	4e-89	XP_017255485.1	PREDICTED: probable histone H2A.1 [Daucus carota subsp. sativus]	94.7	2e-88	sp|Q9C681|H2A1_ARATH	Probable histone H2A.1 OS=Arabidopsis thaliana GN=At1g51060 PE=1 SV=1	At1g51060	253	3e-88	KOG1756	Histone 2A	B	Chromatin structure and dynamics	K11251|1|7e-90|260|dcr:108225176|histone H2A	GO:0006342//chromatin silencing	GO:0003677//DNA binding;GO:0046982//protein heterodimerization activity	GO:0005634//nucleus;GO:0000786//nucleosome;GO:0000790//nuclear chromatin
535	PSR88068.1	Proline-rich receptor-like protein kinase [Actinidia chinensis var. chinensis]	53662.9	0.021	1	1	-	0.76	0.915|0.755|0.795|0.881|0.743|0.754|0.738|0.597|0.628	0.103	9	0.0002466	PSR88068.1	MSGSGTPNKRLHEEAGGTGGSTGGGHSLGSSKYPHDDSAPGYPTVGSKLAPPPPPVAANDYHHHAQPFDYMKISRNESTDRRSPLLPMYHHHRGVLSSSNDSHADHPVASENRSELRDSKDNTRDPKGENQSGKESRGDDNKEAKSDRDRDAYHPEYNFDGVKTEKDGYGAGNSQLNWRESKEQYRGKRYPDAPGGNADPWRAHVHGPIEREVVKEGSAAEDRDYFGSHEAVGENKVDLKGEDRFKDKDRKRKDLKHRDWGERDKDKNDRWNNLQLGSSSGEGKESTREEREAERWERERKDLSKDKEKLKEREKDHFKREAWSGAEKDVLHNEKEAMNVSARTPEFENSTLEQKKQKDHDGWKNIDREARERRKERDADVEGERPEKRSRCYNKDSDD…	55.882	3e-141	XP_021632119.1	zinc finger CCCH domain-containing protein 13 isoform X2 [Manihot esculenta]	-	-	-	-	At5g08450	252	1e-74	KOG4843	Uncharacterized conserved protein	S	Function unknown	K22909|1|4e-119|359|lja:Lj0g3v0221269.1|zinc finger CCCH domain-containing protein 13	GO:0009737//response to abscisic acid;GO:0016575//histone deacetylation;GO:0009845//seed germination;GO:0080186//developmental vegetative growth;GO:0009908//flower development;GO:1902074//response to salt		GO:0005634//nucleus
559	PSR92723.1	Stem-specific protein [Actinidia chinensis var. chinensis]	25827.1	0.387	2	2	-	0.76	0.680|0.668|0.638|0.814|0.803|0.744|0.855|0.814|0.779	0.077	9	3.425e-05	PSR92723.1	MLGVFSSSIVSPPEELVAAGCRTPSPKITATALVDRFLQTNPSGVSVHIGDHVELAYTHHNESPLRPRSFAVKDDIFCLFEGALDNLGSLRQQYGLAKSANEVVLVIEAYKALRDRAPYPPNHVVGHLVGNFAFIVFDKSTSTLFVAADQFGKVPLYWGITADGYVAFANDADLLKGACGKSLASFPQGCFYSTTVGELRSYENPKNKITAVPATEEEIWGAKFMVEGTTTVLAAATK	88.085	7e-155	XP_009765315.1	PREDICTED: stem-specific protein TSJT1 [Nicotiana sylvestris]	46.98	3e-42	sp|P24805|TSJT1_TOBAC	Stem-specific protein TSJT1 OS=Nicotiana tabacum GN=TSJT1 PE=2 SV=1	At5g65010	59.7	6e-10	KOG0571	Asparagine synthase (glutamine-hydrolyzing)	E	Amino acid transport and metabolism	K13783|1|3e-11|67.4|mdm:103409501|MFS transporter, OPA family, solute carrier family 37 (glycerol-3-phosphate transporter), member 1/2!K01953|2|2e-10|64.7|cmos:111463170|asparagine synthase (glutamine-hydrolysing) [EC:6.3.5.4]	-	-	-
562	PSR91268.1	Peptidyl-tRNA hydrolase [Actinidia chinensis var. chinensis]	21219.3	0.052	1	1	-	0.8	0.874|0.887|0.980|0.806|0.820|0.882|0.646|0.633|0.699	0.12	9	0.002025	PSR91268.1	MLGSFRNPSQPSKKQKQDREWLAVSFKPENFIPGLVIGFILGLFLDLSKPTKTTTKKSNLLLGKNQKQRLASVNSDEELKMVLVVRQDLKMGAGKIASQCAHAATGIYSELMHSQRSLLRQWELCGQPKIVVTCKNQQEMNRLKDTAESIGLPTFVVADAGRTQVSAGSKTVLAVGPGSRASVDSVTGKLRLL	78.571	2e-108	XP_011091577.1	peptidyl-tRNA hydrolase 2, mitochondrial isoform X1 [Sesamum indicum]	-	-	-	-	At4g32900	184	7e-59	KOG3282	Uncharacterized conserved protein	S	Function unknown	K04794|1|4e-109|314|sind:105171952|peptidyl-tRNA hydrolase, PTH2 family [EC:3.1.1.29]		GO:0004045//aminoacyl-tRNA hydrolase activity	GO:0016021//integral component of membrane
571	PSR88416.1	Nodulin-related protein [Actinidia chinensis var. chinensis]	13873.6	0.489	5	22	-	0.81	0.691|0.646|1.023|0.685|0.654|0.983|0.763|0.696|1.129	0.185	9	0.01149	PSR88416.1	MDPTPDHKTGEGHHRQPPSTSELFSSAKLVADAAFGKGSETVDKDKVAGAAEDLLNAASHYGKLEEKGYGTYVEKAESYLHQYNSSHSPTPTAAAGGATTHASPKPDGDDEKSADGYGDYFKMAEGFLKKH	58.451	3e-39	XP_002271911.1	PREDICTED: nodulin-related protein 1 [Vitis vinifera]	46.46	3e-21	sp|Q9ZQ80|NDRP1_ARATH	Nodulin-related protein 1 OS=Arabidopsis thaliana GN=NRP1 PE=1 SV=1	-	-	-	-	-	-	-	-	-	-	-
582	PSS31222.1	Nucleoredoxin like [Actinidia chinensis var. chinensis]	48861.3	0.2	4	5	-	0.72	0.654|0.864|0.572|0.785|1.024|0.670|0.656|0.831|0.460	0.17	9	0.002415	PSS31222.1	MRQEVKEATQKDKNKEDEVMEVCRTGEVEVVSSGSRYMSLLTSKDRDFLLSPTGTQVKVSDLEGKVIGLYFSANWYIPCRNFTQVLANTYDKLKTSGSEFEVVFVSSDEDLDAFNNYYASMPWLAIPFSDLESKKALNRRFDVEGIPCLIILQPNSPKDEDTLREGVEIVYRYGVGAFPFTRGRLEELEREENERHENQTLLNLLTNHDRDFLLGHQAPKQVPVGSLTGKTVGLYFSAQWCLPGLKFTPKLISIYEKIKELVVGKGNEDFEIVLVSSDRDPTEFDSHFNSMPWLALPFGDPVTKHLTKYFDIQGIPCLVILGPDGKTITKHGRSLVNLYQENAYPFTEAKVGLLVKQMDDEAKNLPRSEKHVGHRHELTLVSEGSGGGLFICCDCDEQG…	70.283	0	XP_021612706.1	probable nucleoredoxin 2 [Manihot esculenta]	50.67	5e-135	sp|Q0JIL1|NRX2_ORYSJ	Probable nucleoredoxin 2 OS=Oryza sativa subsp. japonica GN=Os01g0794400 PE=2 SV=1	At1g60420	315	7e-102	KOG2501	Thioredoxin, nucleoredoxin and related proteins	R	General function prediction only	K17609|1|0.0|637|mesc:110615235|nucleoredoxin [EC:1.8.1.8]	GO:0045454//cell redox homeostasis	GO:0004791//thioredoxin-disulfide reductase activity	GO:0005737//cytoplasm
597	PSS25998.1	Translocon-associated protein subunit alpha like [Actinidia chinensis var. chinensis]	28429.7	0.058	1	1	-	0.77	0.771|1.007|0.712|0.809|1.037|0.730|0.586|0.737|0.520	0.17	9	0.004841	PSS25998.1	MKIRVFYILALLLLLSSPILKVARCQSNSDVDFVEVAEDAIEGGDLGIIGDDVQDFGDGSFSPAPGMETVCVFPKNPSRSVVAGEESELLVGLKNEGELIVNVIAIKASVHLPYDHRMPVQNLTAQAFNNASVPPSAQATFPYIFAVSKFLQAGTFDLVGTIVYEIDQFPYQSTFYNGTFEVTEAGGPLRVESVFLFCLGISLLGLLGLWIHGQIQHLSKKTKRAPKVEVGTKTTDASMDEWLQGTAYTQSLLSKSKKKK	76	2e-134	XP_021819977.1	translocon-associated protein subunit alpha [Prunus avium]	57.5	1e-79	sp|P45434|SSRA_ARATH	Translocon-associated protein subunit alpha OS=Arabidopsis thaliana GN=At2g21160 PE=2 SV=3	At2g21160	240	4e-79	KOG1631	Translocon-associated complex TRAP, alpha subunit	U	Intracellular trafficking, secretion, and vesicular transport	K13249|1|4e-135|385|pavi:110761733|translocon-associated protein subunit alpha			GO:0016021//integral component of membrane;GO:0005789//endoplasmic reticulum membrane
612	PSS14683.1	Blue-light photoreceptor like [Actinidia chinensis var. chinensis]	50328.4	0.026	1	1	PSR94754.1	0.83	0.693|0.915|1.063|0.556|0.740|0.829|0.719|0.920|1.066	0.173	9	0.0223	PSS14683.1	MDSNNQTLENPEDQTPPEDQNNLASVAPNPLATASISLSISTILPTHFLPPKLSSLLSPHPNKVRIPSQIPSLSHLFLSSSSLSPPKPSFKSTTVSANPLQSPLSLNPGRPSDPFNAAGIRRASIVWFRNDLRIHDNECLNLANNESISVLPLYCFDPRDYGKSASGFDKTGPYRATFVIESVSNLRKNLQARGSDLVVRIGKPETVISELAKEIGADAVYAHREVSHDEVKAEEKIEAAMKEEGIEVKYSWGSTLYHVDDLPFKLDEMPTHYGGFKERVQGLEIRKTIAALDQLRGLPTRGDVETGEIPSLVDLGLNPSATMGQDGKPAANASMAGGETEALQRLAKFAAECRAQPNKGTKNAGNDSIYGANFSCKISPWLSMGCLSPRSMFDELKKS…	82.303	0	ANN22415.1	photolyase/blue-light receptor 2 [Camellia oleifera]	66.24	0	sp|Q8LB72|PHR2_ARATH	Blue-light photoreceptor PHR2 OS=Arabidopsis thaliana GN=PHR2 PE=2 SV=2	At2g47590	565	0	KOG0133	Deoxyribodipyrimidine photolyase/cryptochrome	LT	Replication, recombination and repair;Signal transduction mechanisms	K01669|1|3e-130|387|ppp:112291769|deoxyribodipyrimidine photo-lyase [EC:4.1.99.3]	-	-	-
627	PSR98498.1	1,4-alpha-glucan-branching enzyme 1/amyloplastic like [Actinidia chinensis var. chinensis]	100189	0.179	11	22	-	0.79	0.805|0.787|0.671|0.820|0.827|0.668|0.898|0.872|0.722	0.082	9	0.0001249	PSR98498.1	MVYTLSGIRLPSAPFVHKLPGSTSHGDRKNTNLSCFLKKHSSSRMIFAVRSSNDSDSPSSVVAASEKVLVPGGHIDDSSSSTDILEVANTVSGDRSSSKDQLEVADILSGDAQILHDADNMKMEGDHSTGDDINDVETTDGYSEVNGKHDSVSSPAAVKHVKAMDVETYVLSHDISKEKDMVQQVSIPPPGTGQRIYEIDPLLRSYREHLDYRYAHYTKMREDIDKYEGGLETFSRGYEKFGFNRSATGVTYREWAPGAKSGALIGDFNNWNPNADIMTQNDFGVWEIFLPNNADGSPPIPHGSRVKIRMDTPSGIKDSIPAWIKFSVQAPGQIPFDGIYYDPPEEEKYVFKHSRPKKPKSLRIYESHVGMSSMEPMINTYANFRDDVLPRIKKLGYNA…	78.221	0	XP_009796283.1	PREDICTED: 1,4-alpha-glucan-branching enzyme 2-2, chloroplastic/amyloplastic-like isoform X1 [Nicotiana sylvestris]	75.68	0	sp|Q41058|GLGB1_PEA	1,4-alpha-glucan-branching enzyme 1, chloroplastic/amyloplastic OS=Pisum sativum GN=SBEI PE=1 SV=1	At5g03650	1300	0	KOG0470	1,4-alpha-glucan branching enzyme/starch branching enzyme II	G	Carbohydrate transport and metabolism	K00700|1|0.0|1415|nsy:104242868|1,4-alpha-glucan branching enzyme [EC:2.4.1.18]	GO:0005978//glycogen biosynthetic process	GO:0004553//hydrolase activity, hydrolyzing O-glycosyl compounds;GO:0043169//cation binding;GO:0003844//1,4-alpha-glucan branching enzyme activity	-
654	PSS36307.1	Plastid-lipid-associated protein [Actinidia chinensis var. chinensis]	33796.5	0.325	2	5	-	0.83	0.794|0.599|0.849|0.781|0.625|0.869|1.007|0.839|1.146	0.17	9	0.01911	PSS36307.1	MACSIQGLVTLSFSGIRWRRSSHSSGTIFPENGRKIFCGGKIGRKVRKNGICKAMVQQAVQGASASYSKEMERLSAKESLLLAFKDSGGFEALVTGKTTEMQRIDVNERIIDLERLNPTTRPTTSSFLEGRWNFEWFGAGRPGLFATRFIFQSFPSTLANLSKVDLVIKDQYAKITAIMRLLNSIESKFTVSTQLSVEGPLRMKEEYVEGVLELPQVDEATIPEQLRDAFGQAASTAQQLPVPIRDAMASGLKVPLSGTFGRIFIISYLDDEILIIRDSAGVPEVLTRLDAPPSPLAEPMTEYES	68.91	2e-147	XP_018858820.1	PREDICTED: probable plastid-lipid-associated protein 13, chloroplastic [Juglans regia]	61.99	1e-124	sp|Q8S9M1|PAP13_ARATH	Probable plastid-lipid-associated protein 13, chloroplastic OS=Arabidopsis thaliana GN=PAP13 PE=1 SV=2	-	-	-	-	-	-	-	-	-	-	-
657	PSS02055.1	Peroxiredoxin Q like [Actinidia chinensis var. chinensis]	23661.3	0.612	16	53	-	0.83	0.962|0.869|0.791|0.827|0.762|0.657|0.963|0.841|0.780	0.097	9	0.001181	PSS02055.1	MVMASLSLPSHSIPSLLPTQSHKAILSSQNLPKSPHSRFYGLKLSNASSFSPPSSTKSVKPFIFAKVNKGAAPPNFTLKDQEGRNVNLSKFKGKPVVVYFYPADETPGCTKQACAFRDSYEKFKKAGAEVVGISGDDASSHKAFAKKYRLPFTLLSDEGNKVRKEWGVPSDLFGTLPGRQTYVLDKNGVVQLIYNNQFQPEKHIDETLKLLQSL	80.556	7e-119	XP_021596272.1	peroxiredoxin Q, chloroplastic [Manihot esculenta]	82.41	2e-119	sp|Q6QPJ6|PRXQ_POPJC	Peroxiredoxin Q, chloroplastic OS=Populus jackii GN=PRXQ PE=1 SV=1	At3g26060	290	2e-100	KOG0855	Alkyl hydroperoxide reductase, thiol specific antioxidant and related enzymes	O	Posttranslational modification, protein turnover, chaperones	K03564|1|1e-119|342|mesc:110602960|peroxiredoxin Q/BCP [EC:1.11.1.15]	GO:0045454//cell redox homeostasis	GO:0016209//antioxidant activity;GO:0051920//peroxiredoxin activity;GO:0004601//peroxidase activity;GO:0016491//oxidoreductase activity	GO:0005623//cell
662	PSS23686.1	Thioredoxin-like protein [Actinidia chinensis var. chinensis]	28035.2	0.402	9	15	-	0.82	0.860|0.788|0.861|0.852|0.793|0.845|0.835|0.769|0.776	0.038	9	1.227e-06	PSS23686.1	MAVSLSTISYSNTFRTNKHPNIFPKQSQKNRNRTLSLLPNPFIRTTNLSPPRSPVAVSAISGSPGIDASVVSEDTGSLLDRVQVFDLNGNSVPISDLWKDRKAVVAFARHFGCVLCRKRADYLAAKKDIMDAASVALVLIGPGSVDQAKAFSDQTKFKGEVYADPRYSSYEALRFVSGVSTTFTPGAGLKIIEAYMEGYRQDWGLSFEKDTRTRGGWQQGGIIVAGPGKSNISYVHKDKEAGDDPPIEDILQACCS	70.769	1e-131	XP_009342085.1	PREDICTED: thioredoxin-like protein AAED1, chloroplastic [Pyrus x bretschneideri]	65.68	3e-111	sp|Q9ZUU2|AAED1_ARATH	Thioredoxin-like protein AAED1, chloroplastic OS=Arabidopsis thaliana GN=At2g37240 PE=1 SV=2	At2g37240	283	1e-96	KOG4498	Uncharacterized conserved protein	S	Function unknown	K10878|1|2e-117|356|zju:107432915|meiotic recombination protein SPO11!K15717|4|5e-18|83.6|gsl:Gasu_30200|prostamide/prostaglandin F2alpha synthase [EC:1.11.1.20]	GO:0055114//oxidation-reduction process	GO:0016209//antioxidant activity;GO:0004601//peroxidase activity;GO:0051920//peroxiredoxin activity	-
686	PSS00474.1	Ferredoxin--NADP reductase, leaf-type isozyme like [Actinidia chinensis var. chinensis]	40950.9	0.534	1	12	-	0.83	1.039|0.911|0.812|0.953|0.857|0.743|0.823|0.669|0.643	0.13	9	0.005402	PSS00474.1	MAAAVSAAVSLPSSKSTCLSTKTSIFSPERINFNKVSLPYRNVCGGGKMVSIIRAQVTTEAPAKVEKISKKMEEGVVVNKYRPKDPYIGRCLLNTKITGDDAPGETWHMVFSTEGELPYREGQSIGVIADGIDKNGKPHKLRLYSIASSALGDFGDSKTVSLCVKRLVYTNDKGELVKGVCSNFLCDLKPGAEVKITGPVGKEMLMPKDPNATVIMLATGTGIAPFRSFLWKMFFEKHDDYKFNGLAWLFLGVPTSSSLLYKEEFEKMKEKAPENFRLDFAVSREQTNEKGEKMYIQTRMAQYAEELWELLKKDNTYVYMCGLKGMEKGIDDIMLSLAAKDGINWLDYKKQLKKAEQWNVEVY	91.185	0	NP_001311702.1	ferredoxin--NADP reductase, leaf-type isozyme, chloroplastic [Capsicum annuum]	88.71	0	sp|O04977|FENR1_TOBAC	Ferredoxin--NADP reductase, leaf-type isozyme, chloroplastic OS=Nicotiana tabacum GN=PETH PE=2 SV=1	At1g20020	600	0	KOG1158	NADP/FAD dependent oxidoreductase	C	Energy production and conversion	K02641|1|0.0|666|cann:107859876|ferredoxin--NADP+ reductase [EC:1.18.1.2]		GO:0004324//ferredoxin-NADP+ reductase activity;GO:0000166//nucleotide binding	-
689	PSR86858.1	Linoleate 13S-lipoxygenase [Actinidia chinensis var. chinensis]	103916	0.589	43	177	-	0.82	1.133|0.810|0.802|0.906|0.666|0.644|0.984|0.737|0.720	0.16	9	0.009259	PSR86858.1	MLKSQVVSHHPHPSQTLIPYQKSLLSGIGGFYSHPQLKPISFRKQNNFRIRRNFSNSVKAVFTSTKQSTTVIATVSVKIVSGTWLSKIGWTQGIDTVIDLFGHSIVLELVSSELDPKTGLEKPAIKGYAKKKGESKDEVKYECKFTVPKEFGEIGAILVENEHHKEMHFMDITLDNGLTVNCHSWVAPKSENPTKRIFFTDKSYLPSHTPDGLKRLREQELVEIRGNGQEKRKEHDRIYDYDVYNDLGDPDDDIELKRPVLGGKDFPYPRRCRTGRPRSKKDPFSEAQDSSFYVPRDEAFSDIKSDTFTFKTLFSALHAVVPALETIINDKNLGFRYFTRIDSLFNEGINAPNLPNNSGFLRNFLPRAVKFVKDTRGAVLQFETPDLFERDKFSWFRDE…	68.681	0	ACQ76787.1	lipoxygenase [Camellia sinensis]	62.79	0	sp|O24370|LOX21_SOLTU	Linoleate 13S-lipoxygenase 2-1, chloroplastic OS=Solanum tuberosum GN=LOX2.1 PE=1 SV=1	-	-	-	-	-	-	-	K00454|1|0.0|1227|zju:107412659|lipoxygenase [EC:1.13.11.12]	GO:0031408//oxylipin biosynthetic process	GO:0046872//metal ion binding;GO:0016702//oxidoreductase activity, acting on single donors with incorporation of molecular oxygen, incorporation of two atoms of oxygen	-
708	PSS26479.1	Protein RETICULATA-RELATED 4 like [Actinidia chinensis var. chinensis]	40052	0.139	4	10	-	0.79	0.895|0.907|0.706|0.799|0.879|0.649|0.780|0.784|0.730	0.089	9	0.000236	PSS26479.1	MATTVLSSLSLPFPTPKHRRRRHSPSSSLSFPLLTRRTTTNLSISPISRNPPSLAVFAGGGGGTGGTGGGGGGDGGSGEEGDAGERNRSEAILALAEAGRSLDSLPKDLAAAIEAGKVPGSIVCRYFELEKSPLFRWLLQFGGFKERLLADDLFLAKVAMECGVGIFTKTAAELERRREKFTKELDFVFADVVMAIIADFMLVWLPAPTVSLRPALAISAGPFAKFFYGCPDNAFQVALAGTSYSFLQRVGAIMRNGAKLFAVGTGASLVGTGITNALINARKAIDKTFAGEAEDVPILSTSVAYGVYMAVSSNLRYQVLAGVIEQRILEPLLHQHKILLSAICFVVRTGNTFLGSLMWVDYARWVGIQKIRD	75.773	0	XP_018817204.1	PREDICTED: protein RETICULATA-RELATED 4, chloroplastic-like isoform X1 [Juglans regia]	75.87	2e-163	sp|Q94CJ5|RER4_ARATH	Protein RETICULATA-RELATED 4, chloroplastic OS=Arabidopsis thaliana GN=RER4 PE=2 SV=1	-	-	-	-	-	-	-	K00858|1|7e-23|105|egr:104421503|NAD+ kinase [EC:2.7.1.23]!K02183|2|1e-17|84.7|bna:111212366|calmodulin!K03234|4|5e-12|70.9|soe:110777699|elongation factor 2			GO:0016021//integral component of membrane
763	PSS15462.1	Thiol protease [Actinidia chinensis var. chinensis]	39470.3	0.134	1	1	-	0.78	0.657|0.695|0.581|1.076|1.092|0.951|0.674|0.702|0.586	0.203	9	0.009957	PSS15462.1	MARTSFSLIILSACVAVALSASTFDDENPIRTVVSDALREFETSILSVLGNSRHALSFAHFGHRYGKRYETAEETKLRFAIFSENLKLIRSHNKKGLSYTLAVNHFADWTWEEFRRHRLGAAQNCSATTKGNHKLTEEALPEMKDWRVSGIVSPVKDQGPCGSCWTFSTTGALEAAYKQAFGKGISLSEQQLVDCAGAFNNFGCSGGLPSQAFEYIKYNGGLDTEEAYPYTAQNGACKFSSENVGVQVLESVNITLGAEDELQHAVAVVRPVSVAFEVVNGFRFYKDGVYTSDTCGKTPMDVNHAVLAVGYGVENGVPYWLIKNSWGGAWGDSGYFKMELGKNMCGVATCASYPIVA	93.017	0	ABQ10199.1	cysteine protease Cp1 [Actinidia deliciosa]	74.36	0	sp|Q8RWQ9|ALEUL_ARATH	Thiol protease aleurain-like OS=Arabidopsis thaliana GN=At3g45310 PE=2 SV=1	At5g60360	562	0	KOG1543	Cysteine proteinase Cathepsin L	O	Posttranslational modification, protein turnover, chaperones	K01366|1|0.0|617|zju:107423924|cathepsin H [EC:3.4.22.16]		GO:0008234//cysteine-type peptidase activity	-
765	PSS29193.1	Phosphatidylserine decarboxylase 2 alpha chain like [Actinidia chinensis var. chinensis]	74207.3	0.064	1	1	-	0.65	0.769|0.691|0.543|0.920|0.827|0.633|0.562|0.484|0.380	0.173	9	0.0009776	PSS29193.1	MGHGSSKSESSDESTDDSKGSPSRLSRLKHKLHIHRPNFHLHRRSSSHSLSKSLAAEDFAGIALVKITGAEMKFKDKWLACVSFGEQTFRTDVSDQSTSEGRTDKPIWNSEKKLLLERNGPRVARISVFETNRFSKNSLVGYCEIDLFEFLIQDLDSDVEVFDDLLDPSSPDIVVGSISVSCSVEDPIETEKCFARRILSVVDYNEDGKLSFSEFSDLINAFGSQLAVDKKEELFKAADQNGDGVVCMDELAILLAIQQEKELLINCCPVCGEILEVSDKMNTMIHLTLCFDEGTGNQVMTGGFLTDKQASYGWMFKLSEWAHFSSYDIGLRSGSSASHIVVFDRRTKRLVEELIDRKIVLSMRAIYQSKLGLRLMDKGAKELLQSISEKQGKKMTSVE…	77.307	0	XP_008391350.1	PREDICTED: phosphatidylserine decarboxylase proenzyme 3-like [Malus domestica]	71.52	0	sp|F4KAK5|PSD2_ARATH	Phosphatidylserine decarboxylase proenzyme 2 OS=Arabidopsis thaliana GN=PSD2 PE=2 SV=1	At5g57190	922	0	KOG2419	Phosphatidylserine decarboxylase	I	Lipid transport and metabolism	K01613|1|0.0|1030|mdm:103453579|phosphatidylserine decarboxylase [EC:4.1.1.65]	GO:0006646//phosphatidylethanolamine biosynthetic process;GO:0016540//protein autoprocessing	GO:0004609//phosphatidylserine decarboxylase activity;GO:0005509//calcium ion binding	GO:0016020//membrane
771	PSS11990.1	Serine--tRNA ligase [Actinidia chinensis var. chinensis]	41158.7	0.11	1	1	-	0.77	0.591|0.842|0.861|0.788|1.060|1.139|0.461|0.609|0.622	0.226	9	0.01771	PSS11990.1	MELPVIDLAPFLQLSAKSSGDLAEEKLDHELKNLCSEVSRTLRETGALLVKDPRCSAEDNDRFIDMMEEYFEKPDDFKRLQERPYLHYQVGVTPEGVEVPRSLVDEQMHEKLRAMPKEYQPSTPMGPDPKWRYMWRVGPRPSNTHFQELNAEPVIPEGFPEWKDTMDSWGYKMIAAIEDVAEMAAIGFGLPKDAFTSLMKQGPHLLAPTGSDLRRYGKEGTVFAGYHYDLNFLTIHGRSRFPGLNIWLRNGQKMEVKVPIGCLLIQTGKQIEWLTAGDCIAGMHEVVVTNRTINAINLASQQNRSLWRVSSTLFAHIASDAVLKPLGHFVKSPTASNYPSLCAGEFVEQELSVINLKGNKGEL	84.341	0	XP_002264792.1	PREDICTED: uncharacterized protein LOC100240969 [Vitis vinifera]	-	-	-	-	-	-	-	-	-	-	-	-	-	-	-
800	PSS00122.1	Tubulin polyglutamylase [Actinidia chinensis var. chinensis]	38086.2	0.052	1	2	-	0.83	1.067|0.644|0.884|0.958|0.595|0.778|1.062|0.636|0.869	0.181	9	0.02476	PSS00122.1	MKATLLLSTPPPPLLLPRKLPTLAATPSLPLISTHTFPSLRPRPIRFSIRRADFRVRSDDGDGDCSVDFDMDDDEVDEVDNKKDYDVEYEPLAAGSTALAVAGEEIAMVHSKSFVSTQGWESETLVDYRINEDEFHKISLLDCDFFIRKPPDPDNDVYDFREMYVTPPDTDIYSIPKVLAPMPQKYIRCAKSDYGCYNVTEPPIDAPRDPLYKSEREISKVFLTKHYRNRRLGDPEFVLDFEEIYVIDSKSRSITRGKILVTVPEGRNRDRKKDLLVIRDNGNSFKIIPVSERDDPTTVIEREEWQKSRLDMERHLSKLRDFSVSNWF	74.534	7e-170	XP_009611144.1	PREDICTED: uncharacterized protein LOC104104703 [Nicotiana tomentosiformis]	-	-	-	-	-	-	-	-	-	-	-	-	-	-	-
813	PSS13682.1	Non-specific lipid transfer protein GPI-anchored 1 like [Actinidia chinensis var. chinensis]	19822.7	0.106	2	3	-	0.77	0.762|0.679|0.999|0.750|0.688|0.963|0.675|0.578|0.853	0.14	9	0.001793	PSS13682.1	MRSQTLASFAAAAAVFLCTAAVGGGAAEDLTKECSSAFEKVGTCLSYATGKAAMPSKECCGSVTEIKNSEPVCLCYIIQQTHNGSNQIKSMGIQEGKLLQLPTTCKLTNASVSYCPKLLNIPAGSPDASIFTNTNATSTTPQGPLTTTTTGGDNIGSKHSPNLAGLVAVTVAVLLCSFPTEIVSAFYT	58.333	4e-57	XP_002277578.1	PREDICTED: non-specific lipid transfer protein GPI-anchored 1 [Vitis vinifera]	49.33	7e-44	sp|Q9C7F7|LTPG1_ARATH	Non-specific lipid transfer protein GPI-anchored 1 OS=Arabidopsis thaliana GN=LTPG1 PE=1 SV=1	-	-	-	-	-	-	-	-	GO:0042335//cuticle development;GO:0006869//lipid transport;GO:0050832//defense response to fungus	GO:0008289//lipid binding	GO:0005783//endoplasmic reticulum;GO:0016021//integral component of membrane;GO:0046658//anchored component of plasma membrane;GO:0009505//plant-type cell wall
846	PSR84600.1	Protein NRT1/ PTR FAMILY 6.1 like [Actinidia chinensis var. chinensis]	70617.1	0.028	2	2	-	0.82	0.899|0.916|1.070|0.785|0.811|0.916|0.644|0.622|0.731	0.144	9	0.007466	PSR84600.1	MGTREIKSPEVEMGGNSDHSFRRKKLGIYFIESDDRRTALGGGYVGGTSPVNIRGKPIADLSKTGGWIAAFFIFGNEMAERMAYFGLSVNMVAFMFYVMHRPFSSSANAVNNFLGISQASSVIGGFLADAYLGRYWTIAIFTTIYLVGLTGITLCATIRIFVPNQDQCNQIALLLGNCEPAKPWQMLYLNSFLYLTGFGAAGIRPCVSSFGADQFDERSKDYKSHLDRFFNFFYLSVTVGAIVAFTAVVYIQIQHGWGSAFGSLAIAMGMSNVVFFLGTPLYRHRLPGGSPLTRVAQVLVAAFRKRNASFDSSEIVGLYEVPGKRSAIKGSSKIAHTDNFRCLDKAALQLKEDGTNPSPWRLCTVTQVEEVKILLRLLPVPACTIMLSLILTEFLTLSV…	86.378	0	XP_010250500.1	PREDICTED: protein NRT1/ PTR FAMILY 6.1 [Nelumbo nucifera]	79.32	0	sp|Q9LYR6|PTR49_ARATH	Protein NRT1/ PTR FAMILY 6.1 OS=Arabidopsis thaliana GN=NPF6.1 PE=2 SV=1	At5g13400	1029	0	KOG1237	H+/oligopeptide symporter	E	Amino acid transport and metabolism	K14638|1|0.0|825|cic:CICLE_v10004541mg|solute carrier family 15 (peptide/histidine transporter), member 3/4	GO:0006857//oligopeptide transport	GO:0005215//transporter activity	GO:0016021//integral component of membrane
853	PSS19208.1	CBS domain-containing protein [Actinidia chinensis var. chinensis]	26495.9	0.296	1	1	-	0.78	0.927|0.798|0.707|0.814|0.704|0.603|0.972|0.812|0.718	0.116	9	0.0008941	PSS19208.1	MDSIVFADPNALVRLPVPSSGVHHHQLPCTVAYQIVLRTPPFCISRRSRSRRRLQSPFVVSANSSGTTNSTPTRSGVYTVGDFMTRKEDLHVVKTTTTVDEALDALVDKRITGFPVIDDDWKLVGVVSDYDLLALDSISGGGHADANLFPDVDSSWKTFNKIQRLLSKTNGKVVGDLMTPAPLVVRETTNLEDAVSLLLETKYRRLPVVDGDGRLVGIITRGNVVRAALQIKHANERYHN	68.619	2e-105	XP_010028423.1	PREDICTED: CBS domain-containing protein CBSX2, chloroplastic [Eucalyptus grandis]	72.45	1e-98	sp|O23193|CBSX1_ARATH	CBS domain-containing protein CBSX1, chloroplastic OS=Arabidopsis thaliana GN=CBSX1 PE=1 SV=2	-	-	-	-	-	-	-	K14595|1|4e-82|262|mtr:MTR_4g485640|abscisate beta-glucosyltransferase [EC:2.4.1.263]	GO:0045454//cell redox homeostasis		GO:0009507//chloroplast
859	PSS02797.1	Root phototropism protein, partial [Actinidia chinensis var. chinensis]	43079.2	0.066	2	3	-	0.78	0.885|0.880|0.857|0.862|0.857|0.817|0.644|0.619|0.602	0.121	9	0.001475	PSS02797.1	SGSSWKSGHYMIVGGTKDDIPPVQAKDQRLIIESLISIIPPQKDSVSCSFLLRLLRIANMLKVAPALVTELEKRVGMQFAQATLPDLLIPSYNKTETLYDVDLVQRLLEHFLVQEQMESSSPSSQFFSDKHMYDGSQRGSIPNAKMRVARIVESYLTEVSRDRNLSLTKFQVLAEALPESARTCDDGLYRAIDSYLKAHPTLSEHERKRLCRVMDCQKLSIDACMHAAQNERLPLRVVVQVIFSEQVKISNAIANNSLKEASESHYQSMVSNRKTLLEGTPQSFQEGWAAAKKDINTLKFELETVKTKYLELQNEMESLQRQFDKMAKPKPTSAWTSGWKKLSKLTKMTGLEANDTGLQVPNAEQTRKTPRRWRNSIS	85.333	0	EOX98706.1	Phototropic-responsive NPH3 family protein isoform 2 [Theobroma cacao]	73.49	0	sp|Q9FMF5|RPT3_ARATH	Root phototropism protein 3 OS=Arabidopsis thaliana GN=RPT3 PE=1 SV=2	-	-	-	-	-	-	-	-	GO:0016567//protein ubiquitination;GO:0009638//phototropism		GO:0005886//plasma membrane
878	PSS06362.1	Chlorophyllase-2 like [Actinidia chinensis var. chinensis]	32394.3	0.037	1	1	-	0.51	0.538|0.306|0.600|0.586|0.339|0.634|0.616|0.337|0.660	0.143	9	0.0001411	PSS06362.1	MAEAINVFEQGTYFVRCITVERSDPSSPPKPLLIITPTIQGKYPVLMFCHGFWIENASYTELLRHISSHGYIVVAPQLYTMMFTCGAAELGAAADVTCWLSSGGLNTVLPQSVEPDLLNLALAGHGRGGKAAFALALGLANASLKFSLLLGLDPVEGTDPKVLTHIPRSFDLTIPVVVIGTGLGDNNKFRVLPACAPDGRNHEAFFTECKPPCWYFYARNYGHMDMIDYGKETLTGCLCVSGTGPRGPFRKCLAGIFVAVLRAYLEGQTEYLQAIADQPSIAPTRLDPVIYIEA	58.306	7e-118	XP_002273926.1	PREDICTED: chlorophyllase-1 [Vitis vinifera]	43.23	5e-74	sp|O22527|CLH1_ARATH	Chlorophyllase-1 OS=Arabidopsis thaliana GN=CLH1 PE=1 SV=1	-	-	-	-	-	-	-	K08099|1|1e-118|347|vvi:100249336|chlorophyllase [EC:3.1.1.14]	GO:0015996//chlorophyll catabolic process;GO:0050832//defense response to fungus;GO:0042742//defense response to bacterium	GO:0047746//chlorophyllase activity	GO:0005773//vacuole
908	PSS32340.1	Abscisic acid receptor like [Actinidia chinensis var. chinensis]	21183.9	0.195	2	6	-	0.79	0.682|0.773|0.652|0.786|0.874|0.707|0.872|0.967|0.816	0.102	9	0.0005133	PSS32340.1	MNSNGFSSMEIEFIRKHHRHHLTENQCSSALVKHIKAPVPLVWSLVRRFDQPQKYKPFISRCVVQGNLEIGSLREVDVKSGLPATTSTERLELLDDDEHILSIRIVGGDHRLRNYSSIISVHPEVIDGRPGTLVIESFVVDVPEGNTKDETCYFVEALIKCNLKSLADVSERLALQDRTEPIDRM	91.892	2e-126	XP_002270037.3	PREDICTED: abscisic acid receptor PYL8 [Vitis vinifera]	81.08	4e-110	sp|Q9FGM1|PYL8_ARATH	Abscisic acid receptor PYL8 OS=Arabidopsis thaliana GN=PYL8 PE=1 SV=1	-	-	-	-	-	-	-	K14496|1|3e-127|359|vvi:100251890|abscisic acid receptor PYR/PYL family	-	-	-
920	PSR91388.1	Phosphoribulokinase [Actinidia chinensis var. chinensis]	45269	0.603	4	10	-	0.83	1.040|0.936|0.770|0.976|0.857|0.673|0.866|0.720|0.630	0.141	9	0.008456	PSR91388.1	MAICTFYTVQSLNSISTPTNTHLGFHQKQLLFYSTSKKSSRRQSTTATITCSAENKTVVIGLAADSGCGKSTFMRRLTSVFGGAAEPPKGGNPDSNTLISDMTTVICLDDYHSLDRTGRKKKGVTALDPRANNFDLMYEQVKALKSGIAVEKPIYNHVTGLLDPPELTKPPKILVIEGLHPMYDERVRDLLDFSIYLDISNEVKFAWKIQRDMAERGHSLESIKASIEARKPDFDAYIDPQKQYADAVIEVLPTQLIPDDNEGKVLRVRLIMKEGVKYFNPVYLFDEGSTIGWIPCGRKLTCSYPGIKFSYSPDTYYGNEVSVLEMDGQFDRLDELIYVESHLSNISTKFYGEVTQQMLKHADFPGSNNGTGLFQTIVGLKIRDLYEQLIASKVGAPLE…	90.394	0	ASL69234.1	phosphoribulokinase 1 [Diospyros kaki]	82.8	0	sp|P26302|KPPR_WHEAT	Phosphoribulokinase, chloroplastic OS=Triticum aestivum PE=2 SV=1	At1g32060	691	0	KOG4203	Armadillo/beta-Catenin/plakoglobin	TZ	Signal transduction mechanisms;Cytoskeleton	K00855|1|0.0|763|nnu:104611432|phosphoribulokinase [EC:2.7.1.19]	GO:0043097//pyrimidine nucleoside salvage;GO:0005975//carbohydrate metabolic process;GO:0006206//pyrimidine nucleobase metabolic process	GO:0008974//phosphoribulokinase activity;GO:0004849//uridine kinase activity;GO:0005524//ATP binding	GO:0005829//cytosol;GO:0009507//chloroplast
945	PSS26946.1	adenylate kinase [Actinidia chinensis var. chinensis]	40498.9	0.315	1	2	-	0.73	0.875|0.713|0.747|0.769|0.697|0.674|0.757|0.652|0.684	0.067	9	4.955e-06	PSS26946.1	MASSVALEDVQSADIMTELLRRMTCSSKPDKRLILVGPPGSGKGTQSPIIKDEYCLCHLATGDMLRAAVAAKTPLGIKAKEAMDKGELVSDDLVVGIIDEAMKKPSCQKGFILDGFPRTVVQAEKLDEMLQKQGTKINKVLNFAIDDAILEERITGRWIHPSSGRTYHTKFAPSKVLGVDDDEYCLCHLATGDMLRAAVAAKTPLGIKAKEAMDKGELVSDDLVVGIIDEAMKKPSCQKGFILDGFPRTVVQAEKLDEMLQKQGTKINKVLNFAIDDAILEERITGRWIHPSSGRTYHTKFAPSKVLGVDDVTGEPLIQRKDDTAEVLKSRLEAFHRRYWRTLDSAKGRYCRSSEVKTGGISPAN	92.896	6e-118	XP_002318714.1	hypothetical protein POPTR_0012s09720g [Populus trichocarpa]	89.5	5e-118	sp|Q08480|KAD4_ORYSJ	Adenylate kinase 4 OS=Oryza sativa subsp. japonica GN=ADK-B PE=2 SV=1	At5g50370	325	3e-111	KOG3078	Adenylate kinase	F	Nucleotide transport and metabolism	K00939|1|1e-118|347|pop:7484463|adenylate kinase [EC:2.7.4.3]		GO:0005524//ATP binding;GO:0004017//adenylate kinase activity	-
968	PSS19401.1	Carboxymethylenebutenolidase [Actinidia chinensis var. chinensis]	36495.4	0.033	1	1	-	0.68	0.851|0.690|0.581|0.872|0.710|0.579|0.742|0.581|0.488	0.131	9	0.0002416	PSS19401.1	MNMGIRLASAPLSSSIPTIISSSSSTHSHTRQLNHHHHHLFSTFASPHFPFSLLSRESANLNPRRPLLSFTRYTPCKVSRGQVEVEDGVNDEACELVNGIELSIGEGAESIGAYLFKAVKNNNGTGILLLSDIFGFEDSSTRDFAYRVACNGYNVLVPDLFRGDPWEKDRPKPLFEEWLAKQTLQRVSNDITKCTKWMTDEFVAAGISKKLGIIGFCFGGGRVIDVLAHDQGVCFGIGVSFYGTRIDPSVAASVTVPVLFIAGDNDPLCPVSALEEIEKSSKKGLSKVLVFKGQGHGFAHRPQSPEEDGDAEKAFMVMRNWLYDGLVLGK	65.644	8e-146	XP_006473242.1	PREDICTED: carboxymethylenebutenolidase homolog [Citrus sinensis]	25.17	1e-07	sp|Q9ZT66|E134_MAIZE	Endo-1,3;1,4-beta-D-glucanase OS=Zea mays PE=1 SV=1	At1g35420	327	2e-111	KOG3043	Predicted hydrolase related to dienelactone hydrolase	R	General function prediction only	K01061|1|2e-146|419|cit:102613358|carboxymethylenebutenolidase [EC:3.1.1.45]		GO:0016787//hydrolase activity	-
1055	PSR85997.1	Stress-related protein [Actinidia chinensis var. chinensis]	27903.4	0.184	4	6	-	0.82	0.657|0.959|0.686|0.836|1.202|0.853|0.621|0.827|0.735	0.18	9	0.01292	PSR85997.1	MAESEAKQPTDTETVQDDEKRLKYLDFVQVAAIYVVVCLSSLYEYAKENSGPLKPGVQTVEGTVKTVIGPVYEKFHDVPFELLKFVDRKVDDSMNELDRHVPPLVKQVSCQVLSAAQKAPELARAVASEVKRDGVVDTAANIAKNVYVKYEPTAKELYSKYEPVAEQYAVLAWRSLNRIPLFPQVAGIVVPTAAHWTEKYNQTVNCTAGRGFAVAAYLPLVPIERIAKVFEESEHGPTVSSHREAVTVEQ	77.016	5e-135	CAN59911.1	hypothetical protein VITISV_017032, partial [Vitis vinifera]	75.6	4e-134	sp|Q9SW70|SRP_VITRI	Stress-related protein OS=Vitis riparia GN=SRP PE=2 SV=1	-	-	-	-	-	-	-	K17616|1|1e-48|174|cqi:110713815|CTD small phosphatase-like protein 2 [EC:3.1.3.-]	GO:0080186//developmental vegetative growth;GO:1902584//positive regulation of response to water deprivation;GO:0045927//positive regulation of growth;GO:0034389//lipid particle organization		GO:0005811//lipid droplet
1100	PSR91550.1	Transferase precursor [Actinidia chinensis var. chinensis]	45474.3	0.102	2	2	-	0.81	0.677|0.830|0.815|0.741|0.896|0.886|0.682|0.935|0.815	0.092	9	0.0004962	PSR91550.1	MHRFKPSLQFPKSILYSYLTTLHRKTSRQFSTHRTHLDNAGPMASVLRTRAVVRFRGPDAVKFLQGLVTNDVRKFSETMGESTSTVPTPNLPSVSPSPVYAAMLTPQGRFLYDFFIYGPARPDQKLDGSGSGPGPAPDDLELYADVDGSVLDEILATLKKYRLRSKVDIDNVAEDFSCWQRYGMKLAEESSSVEEPEAASIGWGSTVDQAGISASRGNALGWQWHKDPRLDILGFRGIFPSNTTPPLVEADKETDEKNYLLWRLEKGIAEGSTEIPKGEAMPLEYNLAGLNAVSFDKGCYVGQELIARTHHRGVIRKRLLPLKFVDNSGKEVEQKVAPLSEVTSAASGKKAGTVTTALGCRGLGLLRLEEAFKGLGSLSIQGQEDVKVEAIRPEWWPSD…	73.786	0	XP_010662195.1	PREDICTED: putative transferase At4g12130, mitochondrial [Vitis vinifera]	61.35	0	sp|Q8L733|Y4121_ARATH	Putative transferase At4g12130, mitochondrial OS=Arabidopsis thaliana GN=At4g12130 PE=1 SV=1	At4g12130	417	4e-145	KOG2929	Transcription factor, component of CCR4 transcriptional complex	K	Transcription	K22073|1|0.0|626|vvi:104882013|transferase CAF17, mitochondrial [EC:2.1.-.-]	GO:0016226//iron-sulfur cluster assembly		GO:0005759//mitochondrial matrix
1128	PSS29528.1	26S proteasome non-ATPase regulatory subunit 3 like [Actinidia chinensis var. chinensis]	55784.2	0.246	1	1	-	0.76	0.742|0.864|0.792|0.778|0.901|0.810|0.619|0.695|0.636	0.096	9	0.0001782	PSS29528.1	MTQDVEMKELPAPSNSVTSAGPSTLQHLKEIASLIETGAYAREVRRIVRAIRLTITLRRKLKASVLCAFLNFALVPGSEVHSRLSSYLPKEDEHDMEVDTATSATQAPVKHSLPELEIYCYLLVLIFLIDQKRYNEAKACSSASIARLKNLNRRTIDVLAAKLYFYYSLSYELTGDLAEIRGNLLALHRIATLRHDELGQETLLNLLLRNYLHYNLYDQAEKLRSKAPRFEAHSNQQFCRYLFYLGKIRTIQLEYTDAKESLLQAARKAPIAALGFRVQCNKWAVIVRLLLGEIPERTVFMQKGMEKALRPYFELTNAVRVGDLELFKTVTEKFSSTFSSDRTQNLIVRLRHNVIRTGLRNISISYSRISLADVAKKLRLDSANSVADAESIVSKAIRD…	92.623	0	XP_010266868.1	PREDICTED: probable 26S proteasome non-ATPase regulatory subunit 3 [Nelumbo nucifera]	89.98	0	sp|Q06364|PSMD3_DAUCA	Probable 26S proteasome non-ATPase regulatory subunit 3 OS=Daucus carota GN=21D7 PE=1 SV=2	At1g20200	820	0	KOG2581	26S proteasome regulatory complex, subunit RPN3/PSMD3	O	Posttranslational modification, protein turnover, chaperones	K03033|1|0.0|895|nnu:104604283|26S proteasome regulatory subunit N3	GO:0006511//ubiquitin-dependent protein catabolic process;GO:0042176//regulation of protein catabolic process	GO:0030234//enzyme regulator activity	GO:0000502//proteasome complex;GO:0008541//proteasome regulatory particle, lid subcomplex
1168	PSR86316.1	60S ribosomal protein like [Actinidia chinensis var. chinensis]	15772.6	0.308	2	5	-	0.81	0.831|1.105|0.828|0.858|1.142|0.836|0.543|0.702|0.484	0.221	9	0.03605	PSR86316.1	MAVPLLTKKIVKKRVKKFKRPQSDWKISVKQNWRRPKGIDSRVRRKFKGCTLMPNIGYGSDKKTRHYLPNGFKKFVVHNVKELEVLMMHNRTYCAEIAHNVSTRKRKDIVERAAQLDVVVTNKLARLRSQEDE	95.489	2e-90	XP_008439684.1	PREDICTED: 60S ribosomal protein L32-1-like [Cucumis melo]	86.47	5e-85	sp|P49211|RL321_ARATH	60S ribosomal protein L32-1 OS=Arabidopsis thaliana GN=RPL32A PE=2 SV=2	At4g18100	244	1e-84	KOG0878	60S ribosomal protein L32	J	Translation, ribosomal structure and biogenesis	K02912|1|5e-91|263|cmo:103484404|large subunit ribosomal protein L32e	GO:0006412//translation	GO:0003735//structural constituent of ribosome	GO:0005840//ribosome
1209	PSS28574.1	30S ribosomal protein [Actinidia chinensis var. chinensis]	19037.8	0.114	2	2	-	0.79	0.977|0.976|0.486|0.874|0.871|0.423|1.028|0.998|0.496	0.249	9	0.04538	PSS28574.1	MSAISLSRFIITDLTSPSSLPPTPSHIWRFSSTCPSPFSKSPSCPHLSLTKPRKTLVFAKSSEEAELSAAADEWLKKLPEKKQPLYAHSLPCVEAWLRQLGFYQSKDDRAVWFVEKLDWHAQLSLDVTDLYIRYLKSGPGNLEKDVERRFSYALSREDIENAILGGP	66.471	1e-71	XP_006422094.1	hypothetical protein CICLE_v10006070mg [Citrus clementina]	-	-	-	-	-	-	-	-	-	-	-	-	-	-	-
1216	PSR98761.1	2-alkenal reductase [Actinidia chinensis var. chinensis]	38277.1	0.283	5	6	-	0.77	0.797|0.670|0.935|0.717|0.628|0.823|0.801|0.656|0.928	0.113	9	0.0005851	PSR98761.1	MEGNNKQVIFKGYIDGIPKETDMEVKVAGSSRTAKERPKGALLVKNLYLSCDPYMRGRMRQFHDSYIPPFVPGSVIEGFGVSRVVHSDNPNFKTGDIVTGMTGWEEYSLIQEPQRLRKIQQDDDIPHSYYVGLLGMPGFTAYAGFYEVCAPNKGDCVFVSAASGAVGQLVGQLAKLHGCYVVGSAGTDQKVELVKNKFGFDEAFNYKEEPDLDAALKRYFPQGIDIYFDNVGGAMLDAALGNMRVHGRIAICGMVSEQNLFKPQGIHNLFHLISKRVTMRGFLQSDYLHLFPRFLEDVISYYKQGKIVYIEDMSQGLESAPAALAGLYSGKNVGKQVVCVACD	77.059	0	XP_003635107.1	PREDICTED: 2-alkenal reductase (NADP(+)-dependent) [Vitis vinifera]	64.14	5e-161	sp|Q9SLN8|DBR_TOBAC	2-alkenal reductase (NADP(+)-dependent) OS=Nicotiana tabacum GN=DBR PE=1 SV=1	At1g65560	483	3e-172	KOG1196	Predicted NAD-dependent oxidoreductase	R	General function prediction only	K08070|1|0.0|514|thj:104805677|2-alkenal reductase [EC:1.3.1.74]		GO:0016491//oxidoreductase activity	-
1223	PSS33621.1	Thylakoid membrane protein like [Actinidia chinensis var. chinensis]	31222	0.272	7	10	-	0.79	0.940|0.813|0.770|0.872|0.758|0.692|0.848|0.747|0.706	0.081	9	0.0001135	PSS33621.1	MPIKSPPLTAASSFTVLCSHRFGLCNHPHFLSLNRPSSANALTRQSFFACDGPLLAKPYVQRHVFVTRAAESTQPSAAVDKPTVPDDEFTLAKVSFGVIGLSVGLSLLSYGFGAYFNILPGSEWSAIMLTYGFPLAIIGMALKYAELKPVPCLTYADAQMLREKYATPILKQVRNDVTRYRYGDEQHLEEALKRIFQYGQGGGIPRRSAPVLQMIREEVTEDGKYCLVMVFEAKALQLSDFEQRQAKFTSFFGPGITAEVVKGEKDLYEVRLISNTILE	71.034	2e-141	XP_010263011.1	PREDICTED: uncharacterized protein LOC104601403 [Nelumbo nucifera]	-	-	-	-	-	-	-	-	-	-	-	-			GO:0016021//integral component of membrane
1225	PSS31305.1	Cysteine protease RD21B precursor [Actinidia chinensis var. chinensis]	50224.7	0.063	2	2	-	0.78	0.776|1.052|0.873|0.744|1.002|0.816|0.512|0.662|0.548	0.185	9	0.009412	PSS31305.1	MGWSHWFLILTLCFQIPKSFSYLTSDLFDTWCKEHKKTYSSEQEKLYRLKVFEDNYAFVTHHNTVMVNSSYTLSLNAFADLTHHEFKASRFGRLASKDLSRFDSGSPIEDQSSDAFEAPSSVDWRASGAVTHVKDQGSCGACWAFSATGAMEGINKIVTGTLVSLSEQELVDCDRSYNNGCNGGLMDYAFEFVVKNQGIDNEEDYPFQGGERTCNERKLNQHVVTIDGYTDVPPNKEKRLLQAVATQPVSVGICGSERTFQLYSKGIFDGPCSTALDHAVLIVGYGSEKGVDYWIVRNSWGTRWGMSGYMHMLRNSGNSAGVCGINMLASYPTKTGPNPSPPPPSPGPTKCDLFTSCSPGETCCCTKKVFGICFSWKCCELNSAVCCKDGAHCCPHDYP…	71.971	0	XP_010271530.1	PREDICTED: low-temperature-induced cysteine proteinase [Nelumbo nucifera]	51.72	6e-140	sp|Q9FMH8|RD21B_ARATH	Probable cysteine protease RD21B OS=Arabidopsis thaliana GN=RD21B PE=1 SV=1	At1g09850_1	445	1e-155	KOG1543	Cysteine proteinase Cathepsin L	O	Posttranslational modification, protein turnover, chaperones	K16292|1|5e-127|380|csl:COCSUDRAFT_21961|KDEL-tailed cysteine endopeptidase [EC:3.4.22.-]!K16290|3|4e-120|358|psom:113289651|xylem cysteine proteinase [EC:3.4.22.-]		GO:0008234//cysteine-type peptidase activity	-
1237	PSS30070.1	Tegument protein [Actinidia chinensis var. chinensis]	24358.3	0.08	1	1	-	0.81	0.613|0.774|0.713|0.739|0.926|0.837|0.803|0.986|0.907	0.117	9	0.002128	PSS30070.1	MAESDDVGEKHNGVFVEQSPDQELTLYGVLRRVVAEIFFPDPGSGFGSGPLLRRIKGFLAENIPLLRDALKSTSRDLLLWTRRGTRLRALLVVSVGTVTLLVLTGLFIFMLFFLAATINAIVISLLMSLAAAGGFLALFFAFMTAIYIGALSVAVFIISTVTISAIIAVVITTGWIGFFWTVWLATKKSVSLVKHSLTMTGSALSAYSSARHARRYLEIDKVLD	68.304	1e-99	CAQ58595.1	unknown protein [Vitis vinifera]	-	-	-	-	-	-	-	-	-	-	-	-			GO:0016021//integral component of membrane
1263	PSS04916.1	Transcription factor like [Actinidia chinensis var. chinensis]	45104.4	0.045	1	2	-	0.78	0.717|0.723|0.925|0.692|0.747|0.887|0.697|0.690|0.908	0.1	9	0.0002404	PSS04916.1	MEVEEIQNQGCKFPRISNGRGDLTKIGQKGEDQYQEDEKDGEVKRGITEIGDGGGSGGGGGVARLYGWPSSRIVRVSRASGGKDRHSKVLTSKGLRDRRVRLSVTTAIQFYDLQDRLGYDQPSKAVEWLLKAASVSINELPSINTSFPETPNQLSSSTRSSPPGTETLDEQQQHHVSLSRSACSSTSDTSRGSGLSLSRSESRVKARERARERRTEKEKEREEESRTPPNHTNVSPISQSSFTELLAGGINHTNRAPHQFSSAPMDYFISPSSSRIHPFSEQIQSRNTQISPFIVPGDHHQELQQFSFIPNHLIPVTAGGGGGGGSDYNLNFTISSSGGLAAFNGGTLQSNSQSLLPHIQKLSPVDGSSLPFFVGTAAPNSAPVESHHHQFPAGLDGRL…	65.106	1e-171	AOO86770.1	transcription factor TCP2 [Camellia sinensis]	44.86	2e-76	sp|Q93V43|TCP2_ARATH	Transcription factor TCP2 OS=Arabidopsis thaliana GN=TCP2 PE=1 SV=1	-	-	-	-	-	-	-	-	GO:0006355//regulation of transcription, DNA-templated;GO:0006351//transcription, DNA-templated	GO:0003677//DNA binding	GO:0005634//nucleus
1272	PSS23976.1	Receptor-like protein kinase [Actinidia chinensis var. chinensis]	94982.3	0.027	2	2	-	0.77	0.594|0.762|0.794|0.653|0.835|0.849|0.699|0.871|0.902	0.105	9	0.0004977	PSS23976.1	MKLNRLCFVLPTDLDEIEPVSQHHDQVQLQESTKKDSSHRCCGARVLDIVRGSLKWFLCHNDVLIKQDSGVFHDTSGVDLLDKVVGNNNPRIFSYPELYIGSKGFSEAEILGSGGFGRVYRAVLPSDGTVVAVKCVAERGERFEKTFAAELVAVAHLRHRNLVRLRGWCVHEDQLLLVYDYMPNRSLDRILFRRPENTSAPPLNWENRRKIVDGLAAALFYLHEQLETQIIHRDVKTSNVMLDSHYNARLGDFGLARWLEHELEYQIRTPSMQNHQFRLAETTRIGGTIGYLPPESFQKRCVATAKSDVFSFGVVVMEVVSGRRAVDLTYTDDQIILLDWIRRLSDEGRLLQAGDARLQDGSYTLSDMENFIHIGLLCTLHNPQSRPNMKWVVEALSGT…	75.478	0	XP_007225277.1	receptor like protein kinase S.2 [Prunus persica]	60.35	0	sp|O48837|LRKS2_ARATH	Receptor like protein kinase S.2 OS=Arabidopsis thaliana GN=LECRKS2 PE=2 SV=2	At2g32800	982	0	KOG1187	Serine/threonine protein kinase	T	Signal transduction mechanisms	K04733|1|1e-95|328|ini:109155686|interleukin-1 receptor-associated kinase 4 [EC:2.7.11.1]		GO:0004674//protein serine/threonine kinase activity;GO:0005524//ATP binding	-
1280	PSS32961.1	Small heat shock protein [Actinidia chinensis var. chinensis]	25881	0.164	4	4	-	0.66	0.587|1.009|0.313|0.671|0.949|0.349|0.674|1.039|0.344	0.29	9	0.01241	PSS32961.1	MAATTLTCSSSPRVSNRAGPSSCRAVGPCSVFFPSATNFGRPSRLAAVRAQATGDNKDTAVDVHISNDPRNQGKAVEQRPRRLAVDISPLGLLDPLSPMRTMRQMLDTMDRLFEDSMTFPGTSRSASEVRAPWDIKDEENEIKMRFDMPGLSKEDVKVSVEDDVLVIKGEHKKEEGGDDSWSGKSYSSYDTRLRLPDNCEKDKVKAELKNGVLFISIPKAKLERKVIDVQIQ	74.569	2e-123	OMO97779.1	hypothetical protein COLO4_14358 [Corchorus olitorius]	68.16	2e-107	sp|P30222|HS22C_PETHY	Small heat shock protein, chloroplastic OS=Petunia hybrida GN=HSP22 PE=2 SV=1	At4g27670	263	4e-89	KOG0710	Molecular chaperone (small heat-shock protein Hsp26/Hsp42)	O	Posttranslational modification, protein turnover, chaperones	K13993|1|7e-122|349|tcc:18605848|HSP20 family protein	-	-	-
1284	PSR89827.1	BEL1-like homeodomain protein [Actinidia chinensis var. chinensis]	66400.7	0.035	1	1	PSR86443.1	0.7	0.749|0.596|0.814|0.802|0.652|0.851|0.648|0.501|0.677	0.114	9	0.000182	PSR89827.1	MATYYHGGSEIQADGLHTLYLMNPNYLGYSDTQPPPPSQSNMLFLNSTASVSHAPPPQNHHFVGIPLSTVGSANTDDPNRPSVHEISRFHHNLWANASGNHPDILASGSSDGTSQLGFLSPTSQQGLSLSLSSQRPTYRSLAGEREFSGQAVATGGSSLSVPNGICGAQGVILNSKYLKAAQEVLDEVVNVGMGIKTETGEGMREKGKVSRESMAGSGDGLSGGETRSKGGAELTTAQRQDLQTKKAKLVSMLDEVEQRYRQYHHQMQIVASSFEQAAGVGSAKSYTAFALQTISKQFRCLKDAITTQIKATSKSLGEDESLGGKVEGSRLKFVDHQLRQQRALQHLGMIQHNAWRPQRGLPERAVSVLRAWLFEHFLHPYPKDSDKHILAKQTGLTRS…	58.992	0	XP_002275098.1	PREDICTED: BEL1-like homeodomain protein 1 [Vitis vinifera]	44.35	7e-135	sp|Q9SJ56|BLH1_ARATH	BEL1-like homeodomain protein 1 OS=Arabidopsis thaliana GN=BLH1 PE=1 SV=1	At2g35940	409	1e-134	KOG0773	Transcription factor MEIS1 and related HOX domain proteins	K	Transcription	K16670|1|1e-70|239|bdi:100844103|homeobox protein Meis2!K15613|2|1e-69|242|han:110927075|homeobox protein Meis1	GO:0006355//regulation of transcription, DNA-templated	GO:0003677//DNA binding	GO:0005634//nucleus
1314	PSS11312.1	Protein TRIGALACTOSYLDIACYLGLYCEROL 2 like [Actinidia chinensis var. chinensis]	42496.8	0.384	3	4	-	0.83	0.825|0.854|0.828|0.838|0.874|0.774|0.851|0.864|0.793	0.033	9	7.473e-07	PSS11312.1	MVVNSLVYVSTCPSVLSSPWITSTRNSSSFLPYLPPKSQKKVVRVRSQSSSDAGNTQLPNSSEEKKPFAVILDFPRKVWRQTVRPLSDFGFGRRSIWEGGVGLFLVSGTVLLALSIAWLRGFQLRSKFRKYLAVFEFAQACGLCTGTPVRIRGVTVGNVIRVNPSLKSIEAVVEVEDDKIIIPRNSLVEVNQSGLLMETLIDITPRDPIPTPSVGPLDPNCVKEGVILCDRQKIKGYQGVSLDALVGIFTRLGREVEEIGVANAYSLAERASSVIEEARPLLTKIKAMAEDVQPLLAEVRDSGLLKEIENLTKSLTEASEDLRRVHSSIMTPENTELIRKSVYTLIFTLKNIENISSDIVGFTGDDATRQNLKLLIKSLSRLL	81.984	0	XP_018813114.1	PREDICTED: protein TRIGALACTOSYLDIACYLGLYCEROL 2, chloroplastic-like isoform X1 [Juglans regia]	75.21	0	sp|Q9LTR2|TGD2_ARATH	Protein TRIGALACTOSYLDIACYLGLYCEROL 2, chloroplastic OS=Arabidopsis thaliana GN=TGD2 PE=1 SV=1	-	-	-	-	-	-	-	-			GO:0016021//integral component of membrane
1324	PSS32457.1	Polyadenylate-binding protein [Actinidia chinensis var. chinensis]	25223.2	0.055	1	1	PSS33227.1;PSS34393.1	0.76	0.798|0.705|0.844|0.866|0.777|0.899|0.673|0.579|0.691	0.105	9	0.000323	PSS32457.1	MEHQEQEHEDEVYGGEIPDEGEMDADVDMSRADDDSNSKDLEDMKKRLKEIEEEAGALREMQAKVEREMGSVQDTSSGSATQAEKEEVDLRSIYVGNVDYACTPEEVQQHFQSCGTVNRVTILTDKFGQPKGFAYVEFVEIEAVQNALLLNESELHGRQLKVSAKRTNVPGMKQYRGRRPNPYMGFRSRRPFVPGPSFFPSYGYGRVPRFRRPMRYRPY	86.486	3e-138	XP_012090531.1	polyadenylate-binding protein 1 [Jatropha curcas]	73.27	6e-111	sp|Q9LX90|PABN3_ARATH	Polyadenylate-binding protein 3 OS=Arabidopsis thaliana GN=PABN3 PE=1 SV=1	At5g10350	317	1e-110	KOG4209	Splicing factor RNPS1, SR protein superfamily	A	RNA processing and modification	K14396|1|5e-139|392|jcu:105648675|polyadenylate-binding protein 2		GO:0003723//RNA binding	-
1330	PSS19070.1	Sec-independent protein translocase protein like [Actinidia chinensis var. chinensis]	14966.8	0.051	1	2	PSS26728.1	0.82	1.117|0.782|0.820|1.070|0.755|0.767|0.853|0.578|0.606	0.182	9	0.01573	PSS19070.1	MYCRPTIPRTTPYLSRSTSNPNSTLTHQKIRNNPNLALCNRTRKRGGLCCKSMFGLGVPELVVIAGVAALVFGPKKLPEIGRGIGKTVKSFQQAAKEFESELKKEPDPAIDAPVENPTAAAEEEKEIKVSASKESL	62.937	3e-45	XP_015875362.1	PREDICTED: sec-independent protein translocase protein TATA, chloroplastic [Ziziphus jujuba]	65.62	1e-38	sp|Q9XH46|TATA_PEA	Sec-independent protein translocase protein TATA, chloroplastic OS=Pisum sativum GN=TATA PE=1 SV=1	-	-	-	-	-	-	-	K03116|1|6e-46|150|zju:107412167|sec-independent protein translocase protein TatA	GO:0009306//protein secretion	GO:0008565//protein transporter activity	GO:0016021//integral component of membrane;GO:0005886//plasma membrane
1339	PSS08323.1	Uridine-cytidine kinase, partial [Actinidia chinensis var. chinensis]	16656.7	0.081	1	1	-	0.81	0.883|0.857|0.790|0.744|0.726|0.647|0.950|0.896|0.825	0.096	9	0.0007336	PSS08323.1	MAQDTLSNIESPRRRSGLLRDQVQLVKRKDSDRYEVAPIQDPLSFEKGFFIVIRACQLLAQKNDGIILAGVAGPSGAGKTVFTEKLLHFLPSIAVITMDNYNDSSLIIDGNFDDPRLTDYDTLLENIRGLKEGKPVQVPIYDFKSSSRI	89.189	8e-91	OMP06844.1	Uridine kinase [Corchorus olitorius]	31.46	7e-08	sp|Q9FKS0|UKL1_ARATH	Uridine kinase-like protein 1, chloroplastic OS=Arabidopsis thaliana GN=UKL1 PE=1 SV=1	At1g73980	251	1e-80	KOG4203	Armadillo/beta-Catenin/plakoglobin	TZ	Signal transduction mechanisms;Cytoskeleton	K00876|1|3e-91|265|jre:109011447|uridine kinase [EC:2.7.1.48]		GO:0016301//kinase activity;GO:0005524//ATP binding	-
1355	PSS17405.1	Transcription termination factor like [Actinidia chinensis var. chinensis]	44481.9	0.023	1	1	-	0.8	0.793|0.796|0.869|0.718|0.738|0.773|0.826|0.821|0.895	0.057	9	1.427e-05	PSS17405.1	MYSCRSLIALSLKNPHPFSLYKPHISSFSLLFSSSSRQDRITLADYLLRRHLFSPETVSKLSSPEKYLKNPENSDSVLSFLEESGFSRTQIEQVIKRDPVVLSAKLDTTIKPKIKVLQDSGLSPTDIAEIISTGPWILRGSTDYRLGQTFLTLKSVLGSVVGVSKVLKRHGLLLVRDLEKTLIPNVEFLKSCGISSSQMVKYVYNFPRFFLNKPETIKECVRRVDEMGFSRESKTFLFAIRAISSMTVGSWELKLELFRSLGFSDDDIASAFRRAPHVFAISERKIKEVTRTLVHKGRSDISFIIRHPGLLGYSVENRLEPRLQVLEVLETKKLLPRKPSLTTVLTFTDERFFEKYVLPYLNEVGNLYASLMRANRQQKPVLLVENSQI	54.762	8e-136	XP_007227670.2	uncharacterized protein LOC18793389 [Prunus persica]	25.35	2e-18	sp|Q9FK23|MTEF8_ARATH	Transcription termination factor MTERF8, chloroplastic OS=Arabidopsis thaliana GN=MTERF8 PE=1 SV=1	At5g07900	164	3e-46	KOG1267	Mitochondrial transcription termination factor, mTERF	KR	Transcription;General function prediction only	K15032|1|1e-136|399|pper:18793389|mTERF domain-containing protein, mitochondrial	GO:0006355//regulation of transcription, DNA-templated	GO:0003690//double-stranded DNA binding	-
1365	PSR84992.1	F-box only protein [Actinidia chinensis var. chinensis]	38289.8	0.116	1	1	-	0.81	0.862|0.912|0.861|0.722|0.769|0.703|0.815|0.839|0.791	0.069	9	6.69e-05	PSR84992.1	MVQVMSASTLTTSRSNGVCGSTHLLGKHFRLMKKSHVTFGFERPCLWYHSAQSSSCLGHSYILREQSMRVEAGWFFKGGDQGLDASSEHSESANVDILIFFLHLNLATQVQRALNLEEYGTAQQLRNKLTELETEVIKQQEARSGSASKSEAQDIAISILHRRADLQNAIQGENYALAAEIRDEISKLESESLVHSAKAQLYENAQYAFRLGQKVRHKMFGYRGVVCGMDPFCCESSSWKESSRVEKLSRGAEQPFYQVLVDVGANPNILVAYVPEEKLLAPDEPDMEMFDHPYISFLFYGMDAAGDFIPIKQLREKYNKPRYEVPSDPPEENGEND	68.142	2e-167	XP_002274826.1	PREDICTED: uncharacterized protein LOC100266199 isoform X1 [Vitis vinifera]	60.36	3e-136	sp|Q67Y99|CLPF_ARATH	Clp protease adapter protein ClpF, chloroplastic OS=Arabidopsis thaliana GN=CLPF PE=1 SV=1	-	-	-	-	-	-	-	K10301|1|5e-10|64.7|cvr:CHLNCDRAFT_144212|F-box protein 21		GO:0003677//DNA binding	-
1370	PSS33595.1	Mannose-6-phosphate isomerase [Actinidia chinensis var. chinensis]	48013.3	0.149	3	4	-	0.81	0.856|0.802|0.906|0.749|0.815|0.896|0.765|0.709|0.797	0.066	9	5.091e-05	PSS33595.1	MEANGSASRRSVRRLRCSVKNYDWGRIGREARVAGLFSLNSGVDTDEDKPYAEFWMGTHESGASFLVESSEDEASIGSETEGLSLKSWIAKNPDVLGEKVVQKWGANLPFLFKVLSVAKALSIQAHPDKELAVTLHKMRPDVFKDDNHKPEMALALTEFEALCGFISLEELKDVLQNVPELAEAVGTECANQVLYISSQDGEEKVKEVLQSMFTELMSASKDVISKALSKLKTRLDMASEVRQLTDKEQLVVRLETQYPSDVGVLASFLFNYVKLNPGEALYLGANELHAYLKGECIECMATSDNVVRAGLTPKERDVQILCSMLTYKQGFPKILEGVPLNPYTRRYLPPFDEFEVDRCILPQGASSVFPPSPGPSIFVVIEGEGTMHAKSFEDIVREG…	71.163	0	XP_021643882.1	mannose-6-phosphate isomerase 1-like [Hevea brasiliensis]	60.88	0	sp|Q9M884|MPI1_ARATH	Mannose-6-phosphate isomerase 1 OS=Arabidopsis thaliana GN=PMI1 PE=1 SV=1	At3g02570	532	0	KOG2757	Mannose-6-phosphate isomerase	G	Carbohydrate transport and metabolism	K01809|1|0.0|651|hbr:110637843|mannose-6-phosphate isomerase [EC:5.3.1.8]	GO:0005975//carbohydrate metabolic process;GO:0006486//protein glycosylation;GO:0009298//GDP-mannose biosynthetic process;GO:0000032//cell wall mannoprotein biosynthetic process	GO:0004476//mannose-6-phosphate isomerase activity;GO:0008270//zinc ion binding	GO:0005737//cytoplasm
1377	PSR94775.1	Zinc finger CCCH domain-containing protein [Actinidia chinensis var. chinensis]	50560.1	0.024	1	1	PSS14660.1	0.8	0.754|0.824|0.717|0.841|0.914|0.782|0.790|0.843|0.733	0.062	9	2.201e-05	PSR94775.1	MELYGRSTGSEPDRPVGPETDLEESMRRLGFWGREFIYPERPGVPDCAYYMRTGSCGYGTKCRYNHPRDRSSVGGAVSFAGGEYPERPGEPTCQYYSRTGTCKFGASCKFHHPKNDGGSMTNVPLNSYGYPLRPGEKECSYYLKTGQCKFGITCKFHHPQLGGMSMVESARPFYLTVQPSSVPSTDQYRGISSGYQTGRPPPLPGSYVPGAYGPLLLPPGVVPLPAWSPYSGPVSPALSPGAQPSVLAGSVYGVTQLSSSAPAFAGPYSSFPYPAGPSSSGQNERVFPERPGQPDCQYYLKSGDCKFGSSCRYHHPPDWVVSKTNCVLNHLGLPLRPGMQPCSFYLQNGSCKFGRTCKFDHPVGTVRYSPSASSLTDMPVAPFMIGSSLSSLAPSFSYS…	69.874	0	XP_010652064.1	PREDICTED: zinc finger CCCH domain-containing protein 32 isoform X1 [Vitis vinifera]	59.32	4e-169	sp|Q84W91|C3H32_ARATH	Zinc finger CCCH domain-containing protein 32 OS=Arabidopsis thaliana GN=At2g47850 PE=2 SV=2	At2g47850	466	2e-160	KOG1677	CCCH-type Zn-finger protein	R	General function prediction only	K13832|1|1e-64|227|boe:106335320|3-dehydroquinate dehydratase / shikimate dehydrogenase [EC:4.2.1.10 1.1.1.25]!K23048|3|7e-56|199|ccav:112509964|RING finger protein unkempt!K14404|5|3e-38|143|cann:107874119|cleavage and polyadenylation specificity factor subunit 4		GO:0046872//metal ion binding;GO:0003729//mRNA binding	-
1413	PSS10405.1	Phosphatidate cytidylyltransferase [Actinidia chinensis var. chinensis]	49428.4	0.031	1	1	-	0.79	0.710|0.697|0.797|0.904|0.885|0.985|0.708|0.669|0.764	0.11	9	0.0006703	PSS10405.1	MQKDHGNAPATSTGRLRHRKRSNEVPSEIVKENGSHLLVNDQNKYRSMLTRIYSSIWMIGGFVFIIYMGHLYIWGMVVVIQIFMARELFNLLRKAHEDSHLPGFRLLNWHFFFTAVLFVYGRFLNQRLVNTVTSDKFLYQLVSSFIKYHMVTCYFLYIAGFMWFILTLKKKMYKYQFGQYAWTHMILIVVFTQSSFTVANIFEGMFWFLLPASLIVINDIAAYFFGFFFGRTPLIKLSPKKTWEGFIGASVTTIISAFVLANIMGRYEWLTCPRKDLSTGWLHCDPGPLFKPEYFTLPGWVPKWFPREVQVLPVQWHAMWLGLFASIIAPFGGFFASGFKRAFKIKDFGDSIPGHGGMTDRMDCQMVMAVFSYIYHQSFIVSQSLSVEIVLDQILMNLT…	84.086	0	XP_017223655.1	PREDICTED: phosphatidate cytidylyltransferase 1 [Daucus carota subsp. sativus]	83.14	0	sp|O04940|CDS1_SOLTU	Phosphatidate cytidylyltransferase 1 OS=Solanum tuberosum GN=CDS1 PE=1 SV=1	At4g22340	680	0	KOG1440	CDP-diacylglycerol synthase	I	Lipid transport and metabolism	K00981|1|0.0|745|dcr:108200101|phosphatidate cytidylyltransferase [EC:2.7.7.41]	GO:0006655//phosphatidylglycerol biosynthetic process;GO:0016024//CDP-diacylglycerol biosynthetic process	GO:0004605//phosphatidate cytidylyltransferase activity	GO:0016021//integral component of membrane;GO:0005789//endoplasmic reticulum membrane
1431	PSS35913.1	Protein TRIGALACTOSYLDIACYLGLYCEROL 1 like [Actinidia chinensis var. chinensis]	38435	0.097	3	3	-	0.81	0.789|0.823|0.869|0.868|0.903|0.933|0.696|0.705|0.741	0.087	9	0.0003723	PSS35913.1	MRTTSILHPIFYCSDRRSPIQTGGWPKTRVLHSSQLVGRVEFTGRAHTSKFLMPVRKTRLFVIPNTDDGHPCISEESTNTNNALNFEESFLSKWSPPRYLWRGLSAFILAGQVIIRTLNGKVHWRNTLQQLERVGPRSLGVCLLTSAFVGMAFTIQFVREFTRLGLNRSVGGVLALAFSRELSPVITSIVVAGRIGSAFAAELGTMQVSEQIDTLRVLGSNPIDYLVTPRVIASCVSLPFLTLMCFAVGMASSALLADAVYGVSINIILDSAQRALKSWDIISAMIKSQVFGGIISIVSCAWGVTTLGGAKGVGESTTSAVVLSLVGIFIADFALSCCFFQGAGDSLKNCM	78.814	0	XP_010650404.1	PREDICTED: protein TRIGALACTOSYLDIACYLGLYCEROL 1, chloroplastic [Vitis vinifera]	76.03	9e-175	sp|Q8L4R0|TGD1_ARATH	Protein TRIGALACTOSYLDIACYLGLYCEROL 1, chloroplastic OS=Arabidopsis thaliana GN=TGD1 PE=1 SV=1	-	-	-	-	-	-	-	-	GO:0006810//transport		GO:0043190//ATP-binding cassette (ABC) transporter complex;GO:0009706//chloroplast inner membrane;GO:0009707//chloroplast outer membrane
1432	PSS19161.1	Polyol transporter like, partial [Actinidia chinensis var. chinensis]	51528.6	0.062	1	1	-	0.76	0.901|0.907|0.807|0.842|0.846|0.732|0.648|0.627|0.557	0.127	9	0.001257	PSS19161.1	MADRKGVSGQPDTAVSAFDPPQKPKRNKFAFACAILASMTSILLGYDIGVMSGAGLYIQKDLKISDVKLEVLMGILNVYSLIGSAAAGRTSDWIGRRYTIVLAAVIFFAGALLMGFATDYAFLMVGRFVAGIGVGYALMIAPVYTAELSPASTRGFLTSFPEVFINAGILLGYVSNYAFSKLPLHLGWRVMLGIGAVPSVFLAVGVLAMPESPRWLVLQGRLGDAKKVLDKTSDSKEEALLRLADIKEAAGIPPECNDDVVAVSKRSHGEGVWRDLILHPTPTVRHILIAGVGIHFFQQTSGIDAVVLYSPKIFEKAGITSESHKLLATVAVGFVKTMFILVATFLLDRIGRRPLLLTSVGGMILSLASLGMALTIIDHSDTKLIWAIALAIASVLAYV…	82.438	0	AFI61955.1	polyol transporter [Camellia sinensis]	75.54	0	sp|Q8VZ80|PLT5_ARATH	Polyol transporter 5 OS=Arabidopsis thaliana GN=PLT5 PE=1 SV=2	At3g18830	724	0	KOG0254	Predicted transporter (major facilitator superfamily)	R	General function prediction only	K08150|1|1e-75|249|dzi:111279701|MFS transporter, SP family, solute carrier family 2 (myo-inositol transporter), member 13			GO:0016021//integral component of membrane
1435	PSS13877.1	CCR4-NOT transcription complex subunit 10-B like [Actinidia chinensis var. chinensis]	94723.2	0.07	3	3	-	0.77	0.706|0.861|0.889|0.692|0.849|0.862|0.616|0.726|0.764	0.095	9	0.0002447	PSS13877.1	MDSKDSSLSSSSSMAGSRDAAEDGVSSGAAGLAKDASVAFHSGKFAECVDLLNQLLQKKETDPKVLHNIAVGRYFQDGCSDPRKLLEVLNNVKEQSDELAHASGEHAEAVNNLGSKAVLGPKGTNNAAHQFSNADSLHIVYGDEFDTSVTMLNIAVIWFHLHEYAKAYSILDSLYQTIEPIDEATALHICLLFLDVALALHDPSKFVDVINYVEKAYCASNLISQSDSGSSAQQQSANLVTKCSSFPSNSTATDASNTDSIGSVNASESPLSRTLSEENLETLISTIDMSGQNLARPSGLQSANDLSRTPADHSISTSDLRLKLQLYKVRFLLLTRNLKAAKREVKTAMSMNVARGKDSSMALLLKSEVEYARGNYRKAIKLLMASTNRTETGIASIYY…	68.858	0	XP_002282408.1	PREDICTED: CCR4-NOT transcription complex subunit 10 [Vitis vinifera]	-	-	-	-	At5g35440	503	6e-169	KOG2471	TPR repeat-containing protein	R	General function prediction only	K12607|1|0.0|1195|vvi:100252496|CCR4-NOT transcription complex subunit 10	-	-	-
1443	PSR93517.1	Ribonuclease [Actinidia chinensis var. chinensis]	11110.5	0.214	2	3	-	0.72	0.767|0.705|0.670|0.655|0.612|0.558|0.904|0.815|0.771	0.108	9	0.0001326	PSR93517.1	MGILSWWRGNKEAPLSSAAKPSQKPDQKPAIQPEIPGMNGAVEVARPEAPPPDVTVFEFGSVAGSADKVTLSGYCPVSDELEPCRWEILPASGDDAPQFRVVF	71.698	4e-48	XP_010325548.1	PREDICTED: uncharacterized protein LOC101260559 [Solanum lycopersicum]	-	-	-	-	At3g59840	123	3e-34	KOG1196	Predicted NAD-dependent oxidoreductase	R	General function prediction only	-	-	-	-
1469	PSR89256.1	Plastid-lipid-associated protein [Actinidia chinensis var. chinensis]	42114.5	0.136	2	5	-	0.79	0.718|0.933|0.612|0.721|0.909|0.605|0.784|1.093|0.711	0.161	9	0.004596	PSR89256.1	MALLLASPPPLSSKTPNPPLLFSFLRPSKTHSLSFSLLSKTAKFPTLRLHSAATGDDSSPDDAAPAGVSDEWGEKAEPETEPPTKFYDVDPPKDEDEWGVSSVSQPAAGVDEWGERAEPETEPPTRLSYIDPATDEDEWGNVRVRFGDDYGNGSAGGAEVVDDKLTELKRCLVDTVYGSELGFRASAEVRAEVLELVSQLEAANPTPAPTKASAVLDGNWVLVYTAFSELLPLLAAGTTPLLKVKQICQAINTSSLTIENSTTLSGPFGSFSFSASAAFEVRTPTRIQVEFKEGTLQPPEIKSSIDLPENVDIFGLKINLSPMQQFLNPLQEAVASLARAISGQPPIKLPIPGGRTKSWLLITYLDKDFRISRGDGGLFVLAKEGSPLLDM	53.319	2e-148	XP_010276838.1	PREDICTED: probable plastid-lipid-associated protein 3, chloroplastic [Nelumbo nucifera]	57.33	5e-130	sp|Q94KU5|PAP3_BRACM	Plastid lipid-associated protein 3, chloroplastic OS=Brassica campestris GN=PAP3 PE=2 SV=1	-	-	-	-	-	-	-	-			GO:0009535//chloroplast thylakoid membrane;GO:0010287//plastoglobule
1488	PSS16278.1	Protein LHCP TRANSLOCATION DEFECT like [Actinidia chinensis var. chinensis]	19408.7	0.256	1	1	-	0.49	0.707|0.427|0.471|0.615|0.461|0.410|0.575|0.334|0.368	0.123	9	1.643e-05	PSS16278.1	MASIPCTLRPIFAAKPLNSSSSSRGFAPNLPRTRSRFLGSRIRQGLRTRPGCGGLRITCWFKFGKSGVDAEGAGIYGSQSRDDFNRDDVEQYFNYMGMLAVEGTYDKMETLLSQNIHPVDILLMMAASEGDKPKIEELLRAGASYTVKDANGLTALDKAGSEEIKDFIRGFSAQKA	69.444	3e-82	XP_012460344.1	PREDICTED: protein LHCP TRANSLOCATION DEFECT [Gossypium raimondii]	73.61	5e-73	sp|Q8VY88|LTD_ARATH	Protein LHCP TRANSLOCATION DEFECT OS=Arabidopsis thaliana GN=LTD PE=1 SV=1	-	-	-	-	-	-	-	K01802|1|2e-06|50.4|fve:101303016|peptidylprolyl isomerase [EC:5.2.1.8]	-	-	-
1493	PSR98732.1	Coatomer subunit epsilon-1 like [Actinidia chinensis var. chinensis]	32380.3	0.097	1	1	-	0.72	0.693|0.488|0.880|0.674|0.533|0.849|0.785|0.556|1.001	0.175	9	0.00245	PSR98732.1	MAAPDLLFGLRNNFYLGAYQAAINNSDVPNLSQEDAMERDSLVYRSYIALGSYQLVINEIDSSAATPLQAVKLLALYLSSPDNKETTISSLHEWLADPAIGNNPILRLIAGIIFMHEQDYNEALKHTNVGGTMDLHALNVQIFLKMHRSDYAEKQLRIMQQIDEDHTLTQLANAWLNLAVGGSKIQEAYLIFQDFSEKYQMTSLILNGKAVCCMHMGNFDEAESLLLEALNKDAKDPETLANLVVCSLHLGKSSSRYLNQLKLSHPDHMLVKRSSSAEESFDRAVQTIA	89.583	0	XP_009803842.1	PREDICTED: coatomer subunit epsilon-1-like [Nicotiana sylvestris]	84.78	0	sp|Q9SA78|COPE1_ARATH	Coatomer subunit epsilon-1 OS=Arabidopsis thaliana GN=At1g30630 PE=2 SV=1	At1g30630	525	0	KOG3081	Vesicle coat complex COPI, epsilon subunit	U	Intracellular trafficking, secretion, and vesicular transport	K17268|1|0.0|549|oeu:111407308|coatomer subunit epsilon	GO:0006891//intra-Golgi vesicle-mediated transport;GO:0006890//retrograde vesicle-mediated transport, Golgi to ER;GO:0006888//ER to Golgi vesicle-mediated transport;GO:0015031//protein transport	GO:0005198//structural molecule activity	GO:0031410//cytoplasmic vesicle;GO:0000139//Golgi membrane;GO:0030126//COPI vesicle coat
1519	PSS05764.1	Protein THYLAKOID like [Actinidia chinensis var. chinensis]	33873.2	0.188	2	8	-	0.71	0.738|0.714|0.802|0.763|0.745|0.813|0.646|0.566|0.642	0.082	9	2.461e-05	PSS05764.1	MASISSLSFSALGQSSDRKVSAPPTRSFASDFDGFRLRTNFSCDSFGVRTSNSACRMVIRCMSTATDVPPVSETKLNFLKAYKRPIPSIYNTVLQELIVQQHLMRYKRTYRYDAVFALGFVTVYDQLMDGYPSDEDREAIFQSYIKALNEDPEKYRDDAKKLEEWARAQNASSLVSFSSREGEVEGILKDIAVRAGGKGSFSYSRFFAVGLFRLLELANASEPTILEQLCAALNINKRSVDRDLDVYRNLLSKLVQAKELLKEYVDREKKKIEERAKSQKASEAITTCLGDYRHAGSV	81.419	3e-176	XP_015881005.1	PREDICTED: protein THYLAKOID FORMATION1, chloroplastic [Ziziphus jujuba]	69.7	2e-151	sp|Q7XAB8|THF1_SOLTU	Protein THYLAKOID FORMATION1, chloroplastic OS=Solanum tuberosum GN=THF1 PE=2 SV=1	-	-	-	-	-	-	-	K03797|1|4e-102|318|cqi:110704832|carboxyl-terminal processing protease [EC:3.4.21.102]	GO:0010207//photosystem II assembly	-	-
1520	PSS10367.1	ATP synthase gamma chain 1 like [Actinidia chinensis var. chinensis]	40682.5	0.269	3	10	-	0.82	1.011|0.916|0.766|0.901|0.807|0.672|0.908|0.759|0.682	0.116	9	0.002685	PSS10367.1	MSCSNLSMWVSSKPSLSDPSSRSYRSFHRRSRSSSVRPIQCSSLRELRNRIDSVKSTQKITEAMKLVAAAKVRRAQEAVVNGRPFSQTLVEVLYSINEQVQTDDIDIPLTKVRPVKKVALVVVTGDRGLCGGFNSAIIKKAEARIAELKDLGLEYTVISVGRKGNTYFLRRPYIPVEKFLEGGRLPTAKEAQAIADNVFSLFISEEVDKVELLYTKFVSLVKSDPVIHTLLPLSPKGEICDINGKCVDAAEDEFFRLTTKEGKLTVERDVVRTQTVDFSPILQFEQDPVQILDALLPLYLNSQILRALQESLASELAARMTAMSNATDNAVELRKTLSMVYNRQRQAKITGEILEIVAGADALS	85.676	0	XP_010276111.1	PREDICTED: ATP synthase gamma chain, chloroplastic [Nelumbo nucifera]	83.6	0	sp|Q01908|ATPG1_ARATH	ATP synthase gamma chain 1, chloroplastic OS=Arabidopsis thaliana GN=ATPC1 PE=1 SV=1	At4g04640	611	0	KOG1531	F0F1-type ATP synthase, gamma subunit	C	Energy production and conversion	K02115|1|0.0|648|nnu:104610940|F-type H+-transporting ATPase subunit gamma	GO:0015986//ATP synthesis coupled proton transport	GO:0046933//proton-transporting ATP synthase activity, rotational mechanism	GO:0045261//proton-transporting ATP synthase complex, catalytic core F(1)
1540	PSS28755.1	Anaphase-promoting complex subunit like [Actinidia chinensis var. chinensis]	89223.9	0.021	1	1	-	0.8	0.755|0.673|0.970|0.750|0.732|0.982|0.717|0.655|0.944	0.13	9	0.002036	PSS28755.1	MVVDATSSVCDLGALDSLNGDALKEIVESWNGFCFATDALLKGNGDCSHGSKFVSQAHALCKHGLESLVQEHFIGYLEETFEKNGASKFWRHFDAYRNVAALGMNMDPIQKDRVQQVLCKALEEISFEKQYQEKCLFVLIDALQSYKDSTSDKRQNSDTERLYLISKYQSMVSSVLMASLPPHFPGKSKVQMPETKAKVHDLAGDDYRSSVLESIKEWIQAVPLQFLHALLAYLGDSISYDTHSSGLKSPLASRYAGIDNPSEGLVRWKLRLEYFAYETLQDLRIAKLFEIIVDYPDSSPAIEDLKQCLEYTGQHSKLVDSFISALKYRLLTAGASTNDILHQYVSTIKALRTIDPAGVFLEAVGEPIREYLKGRKDTIKCIVTMLTDGTGGNSSGPGN…	84.577	0	XP_015895049.1	PREDICTED: anaphase-promoting complex subunit 2 [Ziziphus jujuba]	77.78	0	sp|Q8H1U5|APC2_ARATH	Anaphase-promoting complex subunit 2 OS=Arabidopsis thaliana GN=APC2 PE=1 SV=1	At2g04660	921	0	KOG2165	Anaphase-promoting complex (APC), subunit 2	DO	Cell cycle control, cell division, chromosome partitioning;Posttranslational modification, protein turnover, chaperones	K03349|1|0.0|1068|zju:107428957|anaphase-promoting complex subunit 2	GO:0006511//ubiquitin-dependent protein catabolic process	GO:0031625//ubiquitin protein ligase binding	-
1545	PSS34608.1	Ankycorbin like [Actinidia chinensis var. chinensis]	82983.6	0.026	2	2	-	0.68	0.811|0.836|0.744|0.668|0.716|0.599|0.633|0.608|0.544	0.1	9	4.209e-05	PSS34608.1	MMVAAAALKXITCIALFTFQMGWSFAHKLGNMTLYTLPVVIENPSSTVSEILESITEDDEKIFKRIVVPRPEDDQGRKLNDAVEVARSEKDKAGRKILLKNQQDDGGSSSTEKKPFAHEITEEEDDQERKLNDAVEVATRGRKMLVKDQKDDSGSSTRKEPLAQIMEIFESKSQDPAFGLTYYDTRSQVIITSVNGHMISKNLEPVLEALFSIYGNFSAKSKMSQHGNTFIFVILCAAIYSICNTKDAEINECQLLTCWDCFKIAKHAGFEVQFAIDRLRRAMLSYFGLGSTGPALAELDNDDAAIKLMEELEENCALLDREMAKLGKEMKARQEKRELRMTTLLSYSMGKISRDIIEIVGPYKVLTSWDDEHWDDPSETSEQECSSKTSEPERLTSWD…	28.448	2e-15	XP_012070036.1	uncharacterized protein LOC105632300 isoform X2 [Jatropha curcas]	-	-	-	-	-	-	-	-	-	-	-	-	-	-	-
1547	PSR86643.1	Glutathione S-transferase [Actinidia chinensis var. chinensis]	38770.8	0.143	5	7	-	0.78	0.750|0.775|0.668|0.802|0.863|0.698|0.798|0.944|0.764	0.083	9	9.765e-05	PSR86643.1	MMSASCANLLSISPLHCTTIDTQIQITIAPKLPTVSSQFQQLRFLRPLRLFSKNTRAAPTPCLATNVGAEELLPPVLDSNSDPPPLFDGTTRLYTSYICPYAQRVWIARNYKGLQEKIELVPIDLENRPAWYKEKVYPPNKVTFLNTIVNCLGIQSDVENSHLCISKCYCFFMPSTKRCLHWSTIMKSEESLDLIKYIDSCFEGPALYPDDPTKIEFAEELLSYTNTFNLAVLTSLKDNSENKISTAFDYLETALVRFKDGPFFLGQFSLVDVAYAPFVERFHPLLLDVKKYDVTSGRPMLTSWIQEMNKIEAYKQTKRDPQELIAVLKKRFSIN	61.682	2e-129	XP_010651090.1	PREDICTED: glutathione S-transferase L3 isoform X2 [Vitis vinifera]	52.23	2e-94	sp|Q9M2W2|GSTL2_ARATH	Glutathione S-transferase L2, chloroplastic OS=Arabidopsis thaliana GN=GSTL2 PE=2 SV=1	At3g55040	282	5e-94	KOG0406	Glutathione S-transferase	O	Posttranslational modification, protein turnover, chaperones	K00799|1|1e-128|372|vvi:100853342|glutathione S-transferase [EC:2.5.1.18]		GO:0016740//transferase activity	-
1561	PSS17349.1	Geranylgeranyl transferase type-2 subunit alpha like [Actinidia chinensis var. chinensis]	82780.6	0.038	1	1	-	0.77	0.771|0.852|0.861|0.707|0.798|0.784|0.675|0.736|0.742	0.062	9	9.635e-06	PSS17349.1	MHGRARKTPTPQEEKAFALKASKLRPLQSQFLQFHHNKTYTKEALEVCAKLLEANPEYLTAWNYRKVAVEHILSHSETETEIDPESIKSIFSEELRVTERAFAQNYKSYGAWYHRKWVLSKGHSSIDRELQLLEVFLKKDTRNFHAWNYRRFVAALKNRSDEEELQFTTDMISDNFSNYSAWHNRSVLLSQLLEKKVQGYFPKEKVLTEECNLVHQALFTDPDDQSGWFYHLWILDRMVKVESPLLVSTWPPHGSSINVSVKGCLDKSTLSPMTSFDLNTGTIPVILYFSEAVEGVNSSTINVESIYDATQDLIWTPLSTNNSGSAQAWVTYLNFLEEKFHFLQANPLKVSVGHSQGIVSLNGFHCAHPTEFEFTVYVQPPTSQHTDLQCLEMISWGDE…	66.432	0	XP_002283768.1	PREDICTED: geranylgeranyl transferase type-2 subunit alpha 1 [Vitis vinifera]	51.19	0	sp|Q8VYB7|PGTA1_ARATH	Geranylgeranyl transferase type-2 subunit alpha 1 OS=Arabidopsis thaliana GN=RGTA1 PE=1 SV=1	At4g24490	665	0	KOG0529	Protein geranylgeranyltransferase type II, alpha subunit	O	Posttranslational modification, protein turnover, chaperones	K14050|1|0.0|948|vvi:100248920|geranylgeranyl transferase type-2 subunit alpha [EC:2.5.1.60]	GO:0018344//protein geranylgeranylation	GO:0008318//protein prenyltransferase activity	GO:0005968//Rab-protein geranylgeranyltransferase complex
1569	PSR91682.1	hypothetical protein CEY00_Acc28956 [Actinidia chinensis var. chinensis]	17837.4	0.078	1	1	PSS09685.1	0.75	1.028|0.780|0.738|0.856|0.652|0.597|0.869|0.637|0.602	0.146	9	0.001342	PSR91682.1	MKKLLEFGRKAMFYVRVLSGYEERRIRSYRLKLQKHLQQSEERKAALKKIPEQMILSEVRRMVEEMQALNKKLEETEAAIEDHFKPIDKEAEIIMKMQLDGEEKTMREMVKAMQARALLEKAEADRIAGLKSAEANQPVQEKASTSTTQVEVR	70.588	2e-71	XP_015896707.1	PREDICTED: uncharacterized protein LOC107430386 [Ziziphus jujuba]	-	-	-	-	-	-	-	-	-	-	-	-	-	-	-
1624	PSS17171.1	Catalase isozyme 3 [Actinidia chinensis var. chinensis]	57029.4	0.384	3	7	-	0.83	0.981|0.869|0.778|0.916|0.854|0.751|0.881|0.806|0.665	0.095	9	0.001271	PSS17171.1	MMQYRPSSSNNSPFWTTNSGAPVWNNNSSLTVGTRGPILLEDYHLVEKLANFDRERIPERVVHARGASAKGFFEVTHDISHLTCADFLRAPGVQTPVIVRFSTVIHERGSPETLRDPRGFAVKFYTREGNFDLVGNNFPVFFVRDGMKFPDMVHALKPNPKSHIQENWRILDFFSHHPESLHMFTFLFDDVGVPQDYRHMEGSGVNTYTLINKAGKVHYVKFHWKPTCGVKCLLEEEAIKVGGSNHSHATKDLSDSIAAGNYPEWKLFIQTIDPDHEDRFDFDPLDVTKTWPEDILPLQPVGRLVLNKNIDNFFAENEQLAFCLAIVVPGVYYSDDKLLQTRIFSYSDTQRHRLGPNYLQLPANAPKCAHHNNHHEGFMNFMHRDEEVNYFPSRFDPVR…	93.648	0	NP_001312022.1	catalase isozyme 3 [Nicotiana tabacum]	93.03	0	sp|P49317|CATA3_NICPL	Catalase isozyme 3 OS=Nicotiana plumbaginifolia GN=CAT3 PE=2 SV=1	At4g35090	924	0	KOG0047	Catalase	P	Inorganic ion transport and metabolism	K03781|1|0.0|967|nsy:104241240|catalase [EC:1.11.1.6]	GO:0042744//hydrogen peroxide catabolic process;GO:0006979//response to oxidative stress	GO:0046872//metal ion binding;GO:0020037//heme binding;GO:0004096//catalase activity	-
1651	PSS11816.1	Serine/threonine-protein kinase C70.05c [Actinidia chinensis var. chinensis]	24253.4	0.177	3	4	-	0.83	0.947|0.793|0.685|0.842|0.717|0.648|1.057|0.948|0.817	0.136	9	0.006248	PSS11816.1	MGSMASPSSSYIYRNSDKRSAQRSPLPLTIVSQHHNKSPDQLGRREIILRTSEIAVIGAIFNFSGTKPDYLGVQKNNPGLALCPATKNCISTSENVSDLTHYAPPWNYNPGGRRGNKSREEAMEELLQVIQSTKPDKSKPRIVEKKDDYVHVEYESPILGLVDDVEFWFPPGKKSIVEYRSASRVGNFDFDANRKRIKALRLGLEKKGWASENSF	71.749	3e-111	XP_017219867.1	PREDICTED: uncharacterized protein LOC108196896 [Daucus carota subsp. sativus]	-	-	-	-	-	-	-	-	-	-	-	-	-	-	-
1679	PSR95824.1	Inactive protein RESTRICTED TEV MOVEMENT like [Actinidia chinensis var. chinensis]	22497.4	0.075	1	1	-	0.73	0.683|1.226|0.815|0.582|1.036|0.674|0.409|0.703|0.467	0.261	9	0.0139	PSR95824.1	MARRKQAADSVFEEIVPSSAWTEDSSCHILLVDLPGFKKEWLKLQVDDHGQLLVSGQRQASEKKIVHFEQTYKVPENSDPEKTSGKFESEVLYVIVPKQVKEEEREIQNRPANIVEEKHENDQQNKNDENTRAANDKGFQEATRKTRWNESGLLGSVVEVLSKNKGIVVTAVLAFSVGVLVCQRCQSNIGTDQGEFSSA	42.925	1e-48	CDP14851.1	unnamed protein product [Coffea canephora]	33.65	3e-11	sp|D9UBX6|RTM2B_ARATH	Inactive protein RESTRICTED TEV MOVEMENT 2 OS=Arabidopsis thaliana GN=RTM2 PE=3 SV=1	At2g27140	66.6	4e-13	KOG0710	Molecular chaperone (small heat-shock protein Hsp26/Hsp42)	O	Posttranslational modification, protein turnover, chaperones	K13993|1|4e-14|72.4|bna:106435032|HSP20 family protein			GO:0016021//integral component of membrane
1734	PSR86622.1	Tetraspanin-3 like [Actinidia chinensis var. chinensis]	32821.6	0.077	2	3	-	0.74	0.736|0.851|0.623|0.804|0.923|0.663|0.695|0.780|0.569	0.113	9	0.0002913	PSR86622.1	MRTSNHLIGLLNFLTFLLSIPILGGGIWLSSRASTADCLRFLQWPIIVIGASIMVVSLAGFAGSCYRNNFLMYLYLWAMFLIIAALVGFIIFAYVVTDKGSGRPVMNKVYREYNLNDYSGWLEQRVSSNSYWPKIRACIRDSKVCAKMRRTIGGVPETADLFYLRKLSPIQSGCCKPPTECGFEYVNETGWNPGVGLVGSNLDCNRWSNDQQQLCYDCDSCKAGVLASVKKSWRKVSVVNIIILIILVIVYVVACAAFRHNKRIDNDEPYGETRMEKEQPSRMHF	78.947	4e-174	XP_015059128.1	PREDICTED: tetraspanin-3 [Solanum pennellii]	72.63	5e-158	sp|Q9M1E7|TET3_ARATH	Tetraspanin-3 OS=Arabidopsis thaliana GN=TET3 PE=1 SV=1	-	-	-	-	-	-	-	K17345|1|5e-73|228|smo:SELMODRAFT_231326|tetraspanin-5!K17356|3|5e-51|169|pavi:110747917|tetraspanin-13/31!K01184|4|4e-12|70.9|hbr:110656842|polygalacturonase [EC:3.2.1.15]			GO:0016021//integral component of membrane
1739	PSR84605.1	Cytochrome b-c1 complex subunit Rieske-1 like [Actinidia chinensis var. chinensis]	25542	0.261	1	1	-	0.66	0.694|0.818|0.648|0.748|0.877|0.687|0.488|0.543|0.430	0.149	9	0.0005384	PSR84605.1	MNNERKCFAISDFVVPGFASDSLAPAHDIGVMSDLPATVAAVKNPTSKIVYDEHNHERYPPGDPSKRAFAYFVLTGGRFVYASLIRLLVLKFVLSMSASKDVLALASLEVDLSNIEPGTTVTVKWRGKPVFIRRRTEDDIKLANSVDVGSLRDPQEDSDRVKDPEWLIVVGVCTHLGCIPLPNAGDFGGWFCPCHGSHYDISGRIRKGPAPFNLEVPTYSFLEENKLLVG	90.741	3e-148	OVA09690.1	Ubiquinol cytochrome reductase [Macleaya cordata]	89.25	6e-148	sp|P49729|UCRI1_TOBAC	Cytochrome b-c1 complex subunit Rieske-1, mitochondrial (Fragment) OS=Nicotiana tabacum PE=2 SV=1	At5g13440	395	7e-141	KOG1671	Ubiquinol cytochrome c reductase, subunit RIP1	C	Energy production and conversion	K00411|1|2e-148|417|pop:7481176|ubiquinol-cytochrome c reductase iron-sulfur subunit [EC:7.1.1.8]		GO:0051537//2 iron, 2 sulfur cluster binding;GO:0008121//ubiquinol-cytochrome-c reductase activity	GO:0005743//mitochondrial inner membrane;GO:0016021//integral component of membrane;GO:0070469//respiratory chain
1743	PSS35221.1	Protease Do-like [Actinidia chinensis var. chinensis]	45469	0.383	7	13	-	0.79	0.861|0.811|0.750|0.795|0.750|0.595|0.898|0.844|0.785	0.088	9	0.000274	PSS35221.1	MAAYSLISTLCSATPSPPTTLSRSRTSEFSHSLSKSLTLHRNPSRAAPILSAFRNSSLSDSLSSGSDLRYGVRKFFLEEKFFSLALDSLFVFCASVVLSVGIFIADVDSASAFVINTPRKLQSDELATVRLFQENTPSVVYITNLAVRQDVFTLDVLEVPQGSGSGFVWDKYGHIVTNYHVIRGASDLKVTLADQTTVDAPKDKLRPIPVGVSADLLVGQKVYAIGNPFGLDHTLTTGVISGLRREISSAATGRPIQDVIQTDAAINPGNSGGPLLDSSGSLIGINTAIYSPSGASSGVGFSIPVDTVGGIVDQLVKFGKVTRPILGIKFAPDQSVEQLGVSGVLVLDAPARGPAGKAGLLPTKRDAYGRLILGDIITSINGTKVNNGSDLYRILDQCK…	76.906	0	XP_002267510.3	PREDICTED: protease Do-like 1, chloroplastic [Vitis vinifera]	83.24	0	sp|O22609|DEGP1_ARATH	Protease Do-like 1, chloroplastic OS=Arabidopsis thaliana GN=DEGP1 PE=1 SV=2	At3g27925	598	0	KOG1320	Serine protease	O	Posttranslational modification, protein turnover, chaperones	K08669|1|1e-27|120|gsl:Gasu_51390|HtrA serine peptidase 2 [EC:3.4.21.108]	GO:0010206//photosystem II repair;GO:0009735//response to cytokinin	GO:0004252//serine-type endopeptidase activity;GO:0042802//identical protein binding	GO:0009535//chloroplast thylakoid membrane;GO:0005634//nucleus;GO:0031977//thylakoid lumen
1744	PSS34692.1	Phosphoinositide phosphatase [Actinidia chinensis var. chinensis]	67282.7	0.063	3	3	-	0.83	0.864|0.892|0.856|0.921|0.939|0.899|0.714|0.727|0.693	0.096	9	0.001461	PSS34692.1	MEIQPNSGHFKLWSELELHEFRDKFVIKAVESPDQGFSISRSDGQIEPLNGDSSSASPSNVSTIYGVAGTIRLLAGTYVLVIISRKEVGSYIGFPVFRVMSMKFLSCNEDSGLSNYQEKRDEAYFRTLLKVVESTPGLYYSYETDITLSLQRRFKLAKGWMSKPIWKQADPRFVWNRNILEELMENKVRHFFCSEGGHHCFQTGQLKLENSPATITLISRRCTRRLGTRMWRRGANLEGDSANFIETEQLLEFEGFRSSLLQIRGSIPLIWEQIVDLSYKPHLNVIDHEETSKVVERHFRDIVQKYGETIAVDLTDKHGDEGKLSAAFAAEMQKLPNARYISFDFHHYCGNSNLDNIQVLYDQISEDFEKQGFFLVDAEGKILSEQKGIIRSNCIDCLD…	76.858	0	XP_007026664.2	PREDICTED: phosphoinositide phosphatase SAC8 [Theobroma cacao]	64.53	0	sp|Q96328|SAC8_ARATH	Phosphoinositide phosphatase SAC8 OS=Arabidopsis thaliana GN=SAC8 PE=2 SV=1	At3g51830	822	0	KOG1889	Putative phosphoinositide phosphatase	I	Lipid transport and metabolism	K21797|1|0.0|959|tcc:18597522|phosphatidylinositol 4-phosphatase [EC:3.1.3.-]		GO:0052866//phosphatidylinositol phosphate phosphatase activity	-
1745	PSS20784.1	Omega-amidase [Actinidia chinensis var. chinensis]	30958	0.199	2	3	-	0.8	0.925|0.983|0.758|0.800|0.856|0.655|0.756|0.823|0.623	0.117	9	0.001415	PSS20784.1	MKAAIGFFSSSTLDSATPSLLKSSLSLSSHTLLTPSFPLPKCNFSNNSPNIAKPKRTTVTSATTTMTASFKPEEARVPPVVALPTPPLTKFKIALCQLLMTTDKERNIAHARKAIEEAANKGAQLVLLPEIWNSPYSNDSFPVYAEDIDAGGDASPPTAMMSELSRNLKITIVGGSIPERSGDKLYNTCCVFGTDGKLKAKHRKIHLFDIDIPGQMTFKESLTLTAGESPTIVDTDVGRIGIGICYDIRFQELAMLYAARGQRMASCLWQLVRLLEILMLVT	70.189	3e-130	XP_008797647.1	PREDICTED: omega-amidase, chloroplastic [Phoenix dactylifera]	68.34	5e-114	sp|Q8RUF8|NILP3_ARATH	Omega-amidase, chloroplastic OS=Arabidopsis thaliana GN=NLP3 PE=1 SV=1	At5g12040	325	3e-111	KOG0806	Carbon-nitrogen hydrolase	E	Amino acid transport and metabolism	K13566|1|6e-131|379|pda:103712796|omega-amidase [EC:3.5.1.3]	GO:0006807//nitrogen compound metabolic process	GO:0016810//hydrolase activity, acting on carbon-nitrogen (but not peptide) bonds	-
1747	PSR86652.1	Chitinase [Actinidia chinensis var. chinensis]	33548.2	0.083	2	2	PSR86650.1	0.8	0.679|1.057|0.625|0.663|1.013|0.595|0.749|1.147|0.671	0.211	9	0.01652	PSR86652.1	MEFSKLFFTFFILQTLLVPSIQSANSDLFREYIGAEFNNVRFSDVPINSNVEFHFILAFAIDYTTSSSPSPTDGQFNIFWDSDNLSPSQVSSIKNAHSNVKVALSLGGDSVGNGYAYFNPSSVDSWVSNAVSSLTKIIKEYNLDGIDIDYEHFKADPETFSECIGKLITTLKQNGVISFASIAPFDDDQVQSHYLALWRSYGHLIDYVNFQFYAYDQGTTVDQFISYFQTQSSNYNGGKVLASFATDGSGGLSPENGFFTACSRLKSQQNLHGIFVWSADDSMSGGFRYEKQSQSLLAITH	82.623	0	XP_011044097.1	PREDICTED: chitinase 2-like [Populus euphratica]	71.79	2e-146	sp|Q7M443|CHIT2_TULBA	Chitinase 2 OS=Tulipa bakeri PE=1 SV=1	-	-	-	-	-	-	-	-	GO:0005975//carbohydrate metabolic process;GO:0006032//chitin catabolic process	GO:0008061//chitin binding;GO:0004553//hydrolase activity, hydrolyzing O-glycosyl compounds;GO:0004568//chitinase activity	GO:0005576//extracellular region
1748	PSS36498.1	Jasmonate O-methyltransferase [Actinidia chinensis var. chinensis]	45014.7	0.025	1	1	-	0.76	0.740|0.757|0.833|0.821|0.842|0.904|0.639|0.632|0.694	0.095	9	0.0001691	PSS36498.1	MDVDKVFHMKGGLGETSYARNSSLQKKASDMVKHITLETIQQLYLTITPKSLGVADLGCSSGHNSLSIIKEMVDAIEEACHKGSRPVPEFRVHLNDLPTNDFNAIFTALPEFYREVRRERNDGGPPIYVAAYPGSFYGRLFPGECLHFIYSSYSLHWLSRSNRATVGLPVDRINPSIPQLVKEKPAVKDKVRQRVVPPALYDDQGRSINKGNIYISESSPPLVSEAYFSQFQEDLSLFLRSRSEELIHGGRMVLIFLGRMGSDQVDRGNSFFWELLSRSLTTLVSKGEVEEEKLDSYNVHFYAPSADELEDEVRREGSFEMDRLEMFEIDRDVGSSAGYGTAVATTVRAIQEPMISHHFGEGIVDNLFEQYGKLVDEEMAKEEIRPVTFVVVLRKRM	65.909	0	XP_021300864.1	salicylate carboxymethyltransferase [Herrania umbratica]	40.83	5e-95	sp|Q9SPV4|SAMT_CLABR	Salicylate carboxymethyltransferase OS=Clarkia breweri GN=SAMT PE=1 SV=1	-	-	-	-	-	-	-	K21483|1|1e-122|371|bna:106358999|salicylate 1-O-methyltransferase [EC:2.1.1.274]!K08241|3|7e-108|325|atr:18447628|jasmonate O-methyltransferase [EC:2.1.1.141]		GO:0008168//methyltransferase activity	-
1771	PSR85184.1	Glutamine synthetase leaf isozyme like [Actinidia chinensis var. chinensis]	48110.1	0.413	2	19	-	0.82	0.990|0.876|0.836|0.963|0.864|0.778|0.795|0.675|0.635	0.118	9	0.003321	PSR85184.1	MAQILAPSLQWQMRMTKNSTNASPIMSNMWSSLFLKQKKATPKTSAKFRVFALQSGNSTINRLEDLLNMDTTPYTDKIIAEYIWIGGSGIDTRSKSRTISKPVEHPSELPKWNYDGSSTGQAPGEDSEVILYPQAIFKDPFRGGNNILVICDTYTPAGEPIPTNKRHKAAEIFSNKKVVDEIPWYGIEQEYTLLQTNVKWPLGWPVGGYPGPQGPYYCGAGADKSFGRDISDAHYKACLYAGINISGTNGEVMPGQWEFQVGPSVGIEAGDHIWCARYLLERITEQAGVVLSLDPKPIEGDWNGAGCHTNYSTKSMREEGGFEVIKKAILNLSLRHKEHISAYGEGNERRLTGKHETASINTFSWGVANRGCSIRVGRETEQKGKGYLEDRRPASNMDP…	89.815	0	XP_018826105.1	PREDICTED: glutamine synthetase leaf isozyme, chloroplastic [Juglans regia]	88.17	0	sp|P15102|GLNA4_PHAVU	Glutamine synthetase leaf isozyme, chloroplastic OS=Phaseolus vulgaris PE=2 SV=1	At5g35630	770	0	KOG0683	Glutamine synthetase	E	Amino acid transport and metabolism	K01915|1|0.0|823|jre:108995063|glutamine synthetase [EC:6.3.1.2]	GO:0006542//glutamine biosynthetic process	GO:0004356//glutamate-ammonia ligase activity;GO:0005524//ATP binding	-
1779	PSS04603.1	Septin and tuftelin-interacting protein [Actinidia chinensis var. chinensis]	88609.4	0.015	1	1	-	0.75	0.653|0.715|0.636|0.755|0.828|0.717|0.817|0.870|0.773	0.079	9	3.692e-05	PSS04603.1	MPNQEIDRNSKEEEERIESDSADLSGLGLRSDSSSGLGLGLGFHSSTSSKKQAKDNDDGDDDHDFLPTAFGRKIKEGAQQRREKEREKSVKLAKASQSGRLREPEIGDVGAFEKHTKGIGMKLLEKMGYKGGGLGKNEQGIVTPIEAKLRPKKMGMGFNDYKEATLPALQELEDKKSLPPVSQPPTRSKEKLWLKQARQKKKDYVTPEELLTRKQEQGLEVVQKVFDMRGPQVRILTNLENLNAEEKARENDIPMPELQHNVRLVVDLAEVDIQKIDQDLRNERETVVTLQEEKEKLQSVAAQQKQQLDNMVEIVSLLDRIGEESSLGKLTLDSLAMLFGDLQRRYADDYKLCNLSSIACSFALPLFIRVFQGWDPLQNPSHGVDLISLWKNLLQGEDI…	74.419	0	XP_011098023.1	septin and tuftelin-interacting protein 1 homolog 1 [Sesamum indicum]	53.39	0	sp|Q9SHG6|STIP1_ARATH	Septin and tuftelin-interacting protein 1 homolog 1 OS=Arabidopsis thaliana GN=STIPL1 PE=1 SV=1	At1g17070	796	0	KOG2184	Tuftelin-interacting protein TIP39, contains G-patch domain	A	RNA processing and modification	K13103|1|0.0|1195|oeu:111381980|tuftelin-interacting protein 11	GO:0006355//regulation of transcription, DNA-templated;GO:0006397//mRNA processing;GO:0008380//RNA splicing	GO:0003677//DNA binding	GO:0005681//spliceosomal complex
1788	PSS09499.1	Protein like [Actinidia chinensis var. chinensis]	40995.8	0.064	2	2	PSR86178.1	0.8	0.817|0.810|0.964|0.711|0.721|0.831|0.722|0.755|0.844	0.081	9	0.0001092	PSS09499.1	MSCTIAISNSPVFSPSRISSSLFYKSSLSSSPDKALNINHSPSSSSSTPSLPLRLLRLQKPPSGLNRESGDVVVSNSSSPTLLKRKRPARLDIPISCVGFAGPATPAVDGTQVTEVDGDGYSVCCKRGRREAMEDRYSAVVNLQGDPKQAFFGIFDGHGGAKAAEFAAENLNKNILNEVGRRGGQELEEAVKFGYLNTDSEFLKEDIHGGSCCVTALIRKGQLVVSNAGDCRAVMSRGGVAEALTSDHRPSRDDEKDRIENLGGFVDCCHGVWRIQGSLAVSRGIGDGHLKQWVTAEPETKILRIEPVYEFLILASDGLWEKVTNQEAVDIARPLCVGIQKPELLSACRKLAALSVSRGSKDDISVMLIQLGRFY	69.191	0	CDP09211.1	unnamed protein product [Coffea canephora]	64.41	6e-162	sp|O80871|P2C25_ARATH	Probable protein phosphatase 2C 25 OS=Arabidopsis thaliana GN=At2g30020 PE=1 SV=1	At2g30020	459	1e-161	KOG0698	Serine/threonine protein phosphatase	T	Signal transduction mechanisms	K17506|1|5e-169|481|mesc:110605863|protein phosphatase 1L [EC:3.1.3.16]		GO:0046872//metal ion binding;GO:0004722//protein serine/threonine phosphatase activity	-
1790	PSR98619.1	Magnesium-chelatase subunit ChlI like [Actinidia chinensis var. chinensis]	46383.1	0.34	3	7	-	0.82	1.090|0.691|0.844|1.054|0.632|0.823|0.955|0.598|0.732	0.179	9	0.01805	PSR98619.1	MAAVLGTSSAAVLASRPLSSHSSKSQIHSLSTNPGQSYGRKFYGGISVPVKKGRSKVRVAISNVATEISPAQEQARKLASESQRPVYPFSAIVGQDEMKLCLLLNVIDPKIGGVMIMGDRGTGKSTTVRSLVDLLPEIIVVSGDPFNSDPEDPESMGMEVREKLVRGDELPVMMTKINMVDLPLGATEDRVCGTIDIEKALTEGVKAFEPGLLAKANRGILYVDEVNLLDDHLVDVLLDSAASGWNTVEREGISISHPARFILIGSGNPEEGELRPQLLDRFGMHAQVGTVRDAELRVKIVEERARFDKNPKEFRDSYKAEQDKLQEQISSARNSLSSVQMDRDLQVKISKVCAELNVDGLRGDIVTNRAAKALAALKGREEVTSEDIATVIPNCLRHR…	85.681	0	XP_019175918.1	PREDICTED: magnesium-chelatase subunit ChlI, chloroplastic [Ipomoea nil]	84.04	0	sp|O22436|CHLI_TOBAC	Magnesium-chelatase subunit ChlI, chloroplastic OS=Nicotiana tabacum GN=CHLI PE=2 SV=1	-	-	-	-	-	-	-	K03405|1|0.0|736|ini:109171296|magnesium chelatase subunit I [EC:6.6.1.1]	GO:0015995//chlorophyll biosynthetic process;GO:0015979//photosynthesis	GO:0016851//magnesium chelatase activity;GO:0005524//ATP binding	GO:0009507//chloroplast
1799	PSS21760.1	26S proteasome non-ATPase regulatory subunit 3 like [Actinidia chinensis var. chinensis]	55827.2	0.283	1	1	-	0.73	0.632|0.697|0.705|0.970|1.042|1.068|0.469|0.485|0.490	0.241	9	0.01066	PSS21760.1	MTQDVEMKEQPALSNSITSAGPSTLQHLKEIASLIETGAYAREVRRIVRAIRLTIMLRRKLKSSVLCSFLNFALVPGSEVHSRLSSYLPKEDEHDMEVDTAASATQAPVKHSLPELDIYCYLLVLIFLIDQKRYNEAKACSSASVARLKNLNRRTIDVLAARLYFYYSLSYELTGDLAEIRGNLLALHRVATLRHDELGQETLLNLLLRNYLHYNLYDQAEKLRSKAPRFEAHSNQQFCRYLFYLGKIRTIQLEYTDAKESLLQAARKAPVAALGFRVQCNKWAVIVRLLLGEIPERTVFMQKGMEKALRPYFELTNAVRVGDLELFKTVAEKFSSTFSSDRTQNLIVRLRHNVIRTGLRNISISYSRISLVDVAKKLRLDSANPVADAESIVSKAIRD…	91.598	0	XP_010266868.1	PREDICTED: probable 26S proteasome non-ATPase regulatory subunit 3 [Nelumbo nucifera]	89.78	0	sp|Q06364|PSMD3_DAUCA	Probable 26S proteasome non-ATPase regulatory subunit 3 OS=Daucus carota GN=21D7 PE=1 SV=2	At1g20200	822	0	KOG2581	26S proteasome regulatory complex, subunit RPN3/PSMD3	O	Posttranslational modification, protein turnover, chaperones	K03033|1|0.0|887|nnu:104604283|26S proteasome regulatory subunit N3	GO:0006511//ubiquitin-dependent protein catabolic process;GO:0042176//regulation of protein catabolic process	GO:0030234//enzyme regulator activity	GO:0000502//proteasome complex;GO:0008541//proteasome regulatory particle, lid subcomplex
1816	PSR87640.1	AAA-ATPase [Actinidia chinensis var. chinensis]	55153.2	0.048	1	1	-	0.73	0.669|0.687|0.620|0.718|0.755|0.655|0.847|0.865|0.780	0.085	9	3.529e-05	PSR87640.1	MTMNDMFGQLGSIIAGVMFTWAMFQQFFPHQLRSHIEKQSQRFVNLVYPYIQITFNEFTGERLMRSEAYSAIETYLSSNSSMQAKRLKADIVKNSQSLALSMDDHEEVADEFEGIKLWWASGKSISKAQSFSLYPITDEKRYYKLTFHKRHRELIIGPYLNYVLKEGKAIKVKNRQRKLYTNNGSHWSHVVFEHPATFQTLAMDPEKKKEIIDDLITFSKAENFYARIGRAWKRGYLLYGPPGTGKSTMIAAMANLLGYDLYDLELTAVKDNTELRKLLIETSSKSIIVIEDIDCSADLTGQRKKKKEKDEEEEKDPVQQLAKEETDTKTSKVTLSGLLNFIDGLWSACGGERLIVFTTNYADKLDPALIRRGRMDKHIELSYCSFEAFKVLAKNYLHL…	77.453	0	XP_021297760.1	AAA-ATPase ASD, mitochondrial-like [Herrania umbratica]	60.18	0	sp|Q9FLD5|ASD_ARATH	AAA-ATPase ASD, mitochondrial OS=Arabidopsis thaliana GN=AATP1 PE=1 SV=1	At5g40010	569	0	KOG0743	AAA+-type ATPase	O	Posttranslational modification, protein turnover, chaperones	K08900|1|0.0|768|mesc:110601980|mitochondrial chaperone BCS1		GO:0016787//hydrolase activity;GO:0005524//ATP binding	GO:0016021//integral component of membrane
1824	PSS10193.1	Jasmonate-induced protein [Actinidia chinensis var. chinensis]	23635.3	0.232	4	4	-	0.73	0.713|0.990|0.653|0.611|0.811|0.549|0.808|0.819|0.632	0.137	9	0.0007078	PSS10193.1	MAYNVFGNAITDATLKALPEYQNKTITRTDRARVAYMKKNADNKDVNARQYVKGLRDKYGSNDSVQCLIYNATGDPVTFVLSHDFQGSLGESPFPITIENGQWGGFLHVSWLFTGSIGGVVYRGKNCYDEECDWFFAWNNPYNKSGYKSTAYVAIHPKGYYSDADWGSMFGTVLSTDVTHSCVWNGCLANGAVGRLDSAVFEGLMIDSHAL	49.065	4e-64	XP_010920410.1	PREDICTED: 23 kDa jasmonate-induced protein [Elaeis guineensis]	40.45	4e-30	sp|P32024|JI23_HORVU	23 kDa jasmonate-induced protein OS=Hordeum vulgare PE=2 SV=1	-	-	-	-	-	-	-	K04733|1|4e-30|120|han:110908645|interleukin-1 receptor-associated kinase 4 [EC:2.7.11.1]!K04730|3|3e-26|109|sbi:8064083|interleukin-1 receptor-associated kinase 1 [EC:2.7.11.1]	-	-	-
1846	PSS29003.1	3-oxoacyl-[acyl-carrier-protein] synthase, partial [Actinidia chinensis var. chinensis]	15387.9	0.397	1	1	-	0.71	0.842|0.886|0.976|0.803|0.842|0.902|0.354|0.357|0.393	0.258	9	0.01962	PSS29003.1	MQALQSSSLLRPSQLTPAAKRPMKRPSFVAASSSRPVSAPKRETDPKKRVVITGTGLVSVFGNDVDAYYDRLLSGESGITTIDRFDASKFPTRFGGQIRGFSAEGYIDGKNDRRLDDCLRYCIVAGKKALEDADLGGDRLG	77.333	6e-72	NP_001310640.1	3-oxoacyl-[acyl-carrier-protein] synthase I, chloroplastic [Ricinus communis]	72.73	4e-69	sp|P52410|KASC1_ARATH	3-oxoacyl-[acyl-carrier-protein] synthase I, chloroplastic OS=Arabidopsis thaliana GN=KAS1 PE=1 SV=2	At5g46290	215	8e-69	KOG1394	3-oxoacyl-(acyl-carrier-protein) synthase (I and II)	IQ	Lipid transport and metabolism;Secondary metabolites biosynthesis, transport and catabolism	K09458|1|1e-72|228|rcu:8264135|3-oxoacyl-[acyl-carrier-protein] synthase II [EC:2.3.1.179]	GO:0006633//fatty acid biosynthetic process	GO:0016747//transferase activity, transferring acyl groups other than amino-acyl groups;GO:0004315//3-oxoacyl-[acyl-carrier-protein] synthase activity	-
1853	PSS33341.1	Coronatine-insensitive protein [Actinidia chinensis var. chinensis]	67772.8	0.058	3	4	-	0.83	0.728|0.754|0.833|0.772|0.805|0.908|0.834|0.843|0.980	0.078	9	0.0002503	PSS33341.1	MEDGKANKTPGGMPDTVFEWVIDFLHDARDRDAVSLVCRRWFEIDKSTRKHVTIALCYTTTPQSLWRRFPHLESLKLKGKPRAAMFNLIPEDWGGYVSPWVEEIARSFSCLNALHFRRMIVRDLDLERLAHSRGRVLQILKLDKCSGFSTDGLLHIGRSCKKLKTLFLEESSIIEKDGEWLHELALNNNVLETLNFYMTDLAKVRFQDLEIIARNCRSLVSMKISECELLDLVGFFGAASVLEEFGGGSIGEQPERYSSLSFPPKLCCLGLTYMGRNEMPIVFPFASLLRRLDLLYALLDMEDHCLLIHRCPNLEVLETRNVIGDRGLEVLARCCKRLRRLRIERGADELGMEDEEGLVSHRGLIALAQGCLELEYMAVYVTDITNASLEYIGTYLKNL…	84.041	0	ANB66332.1	coronatine insensitive 1 [Camellia sinensis]	72.54	0	sp|O04197|COI1_ARATH	Coronatine-insensitive protein 1 OS=Arabidopsis thaliana GN=COI1 PE=1 SV=1	At2g39940	851	0	KOG1947	Leucine rich repeat proteins, some proteins contain F-box	R	General function prediction only	K13463|1|0.0|975|tcc:18585944|coronatine-insensitive protein 1	-	-	-
1883	PSR92677.1	Glutamine synthetase [Actinidia chinensis var. chinensis]	48231.1	0.312	2	11	-	0.77	0.906|0.811|0.737|0.900|0.820|0.721|0.779|0.628|0.636	0.101	9	0.0003079	PSR92677.1	MAHILAPSQQWQMRITKNSTNASPMTSKMWNSLPLKQNKKTKAKTSAKFRVFALHSENSTINRMEDLLNMDITPYTDKIIAEYIWIGGSGIDLRSKSRTISKPVEHPSELPKWNYDGSSTGQAPGEDSEVILYPQAIFKDPFRGGNNILVICDTYTPAGEPIPTNKRHRAAEIFSNQKVIDEIPWYGIEQEYTLLQSNVKWPLGWPVGGYPGPQGPYYCGAGADKSFGRDISDAHYKACLYAGINISGTNGEVMPGQWEFQVGPSVGIEAGDHIWCARYILERITEQAGVVLSLDPKPIEGDWNGAGCHTNYSTKSMREEGGFEVIKKAILNLSLRHKEHISAYGEGNERRLTGKHETASINTFSWGVANRGCSVRVGRDTEKQGKGYLEDRRPASNMD…	92.13	0	XP_018826105.1	PREDICTED: glutamine synthetase leaf isozyme, chloroplastic [Juglans regia]	88.43	0	sp|O22506|GLNA2_DAUCA	Glutamine synthetase, chloroplastic OS=Daucus carota GN=GLN2 PE=2 SV=1	At5g35630	766	0	KOG0683	Glutamine synthetase	E	Amino acid transport and metabolism	K01915|1|0.0|847|jre:108995063|glutamine synthetase [EC:6.3.1.2]	GO:0006542//glutamine biosynthetic process	GO:0004356//glutamate-ammonia ligase activity;GO:0005524//ATP binding	-
1904	PSS04811.1	Guanylate-binding protein like [Actinidia chinensis var. chinensis]	121530	0.125	3	3	-	0.83	0.777|0.823|0.866|0.893|0.939|0.970|0.701|0.713|0.751	0.097	9	0.001032	PSS04811.1	MMKRLFSRDPGDLPPQPSPEPLQSQPAVTGPARPIRLVYCDENGKFRMDPEAVAALQLVKDPIGVVSVCGRARQGKSFILNQLLGRSSGFQVASTHRPCTKGLWLWSAPIRRTALDGTEYNLLLLDSEGIDAYDQTGTYSTQIFSLAVLLSSMFIYNQMGGIDEAALDRLSLVTEMTKHIRVRATGGRSTASELGQFSPIFVWLLRDFYLDLVEDNRRITPRDYLELALRPVQGSGRDIAAKNEIRDSIRALFPDRECFPLVRPLSNEYELQRLDQIPLDKLRVEFRSGLDALTKFVFERTRPKQVGATVMTGPILARITQSFLDAINNGAVPTITSSWKSVEEAECQRAYDLATEVYMSAFDRSKPPEEVALREAHEAAVQKSLSAFNDTAIGAGPTR…	80.899	0	XP_010655463.1	PREDICTED: guanylate-binding protein 2 [Vitis vinifera]	-	-	-	-	At5g46070	1294	0	KOG2037	Guanylate-binding protein	R	General function prediction only	K20899|1|0.0|1441|soe:110801556|guanylate-binding protein 1/3/4/7		GO:0003924//GTPase activity;GO:0005525//GTP binding	-
1918	PSS18122.1	Protein FLUORESCENT IN BLUE LIGHT like [Actinidia chinensis var. chinensis]	37590.4	0.205	2	3	-	0.8	0.919|0.770|0.848|0.831|0.722|0.757|0.849|0.707|0.775	0.069	9	4.189e-05	PSS18122.1	MAVVVRCSCALLRRDSASFDRQRSPSDQFPLKRHLLGKFASIPFKVKKLVSSLGDAANEEFEAYQALLDSQFMLMALNDVKTYFSKGTCNTGCTQLDHATTLEGLVAHQVMILGRPPAVALIIANALMLSTPFEALAETCEADQSVFNMPLLLFVALVGATVGGLLARQRRGELKRLNEQLRQINAALRRQAKIESYAPALSYAPVGGRIQESEVIVDPRKHELISRLKLGKNFLRNHDPDKAYLEFKTALDLAQSLSDPTEEKKAARGLGASLQRQGKYREAIKYHSMVLAISEREGENSGNTEAYGAIADCYTELGDLERAAKFYDNYIARLESD	65.282	9e-147	XP_015901740.1	PREDICTED: protein FLUORESCENT IN BLUE LIGHT, chloroplastic-like isoform X1 [Ziziphus jujuba]	57.8	2e-125	sp|Q940U6|FLU_ARATH	Protein FLUORESCENT IN BLUE LIGHT, chloroplastic OS=Arabidopsis thaliana GN=FLU PE=1 SV=1	-	-	-	-	-	-	-	-			GO:0016021//integral component of membrane
2005	PSS36627.1	UTP--glucose-1-phosphate uridylyltransferase [Actinidia chinensis var. chinensis]	51997.5	0.726	15	70	-	0.79	0.803|0.911|0.716|0.796|0.923|0.727|0.717|0.847|0.656	0.093	9	0.0002464	PSS36627.1	MATVTLSPAEAEKISTLQSAVASLPQISENEKSGFINLVARYLSGEAQHIEWSKIQTPTDEVVVPYDSLAPAPEDAVETKKLLDKLVVLKLNGGLGTTMGCTGPKSVIEVRNGLTFLDLIVIQIESLNAKYGCNVPLLLMNSFNTHDDTQKIVEKYANSNIEIHTFNQSQYPRLVVDDFIPLPCKGNTGKDGWNPPGHGDVFPSLKNSGKLDALLSKGKEYVFIANSDNLGAVVDLKILNHLVRNKNEYCMEVTPKTLADVKGGTLISYEGKVQLLEIAQVPDENVNEFKSIEKFKIFNTNNLWVNLGTIKRLVEADALKMEIIPNPKEVDGVKVLQLETAAGAAIRFFDNAIGINVPRSRFLPVKATSDLLLVQSDLYTLNDGFVIRNPARANPANPS…	99.368	0	AII73556.1	UGP-glucose pyrophosphorylase [Actinidia eriantha]	88.12	0	sp|Q9SDX3|UGPA_MUSAC	UTP--glucose-1-phosphate uridylyltransferase OS=Musa acuminata GN=UGPA PE=2 SV=1	At5g17310	788	0	KOG2638	UDP-glucose pyrophosphorylase	G	Carbohydrate transport and metabolism	K00963|1|0.0|841|jcu:105636149|UTP--glucose-1-phosphate uridylyltransferase [EC:2.7.7.9]	GO:0006011//UDP-glucose metabolic process	GO:0003983//UTP:glucose-1-phosphate uridylyltransferase activity	-
2082	PSS16121.1	hypothetical protein CEY00_Acc13620 [Actinidia chinensis var. chinensis]	61572.7	0.02	1	1	-	0.77	0.673|0.972|1.350|0.507|0.735|0.988|0.392|0.538|0.746	0.296	9	0.032	PSS16121.1	MVSKAWRIIPRPLLETILNNHAKTHRVHQPLLLHGPRGVGKTSLILHRVLNKWNTGPHITGYVDFAQSIEEHHPQHGHSFPWTSWSGCPPPTLPTLRTQLENCLESMAEKGVSLGTISSQQIFTTLNKWHGLNTALRRILQSNAPTRSKTAVSDKASSSVLWGRAVCALSARLNANEIDGVLGSGVKGRNVSVEETSHFREAVVALRLAKEVIRMQQGWRDNAVKHLNRIGGFSRTLANSATDWPFLLLDLLSSASEIDYFQPKLVLNNIEVLKQAVLTDDSTVSGSTYHDSLLWRIIALGANESCLPVILVTSDSYYSDQAFIDFGYPEIFISRETFGWTPQEAKMHMVPDYFSQSEWNVVVEVLGPSPRHLFELYALKQGNFYQRVLDEKGSTFEDI…	72.777	0	ONI18339.1	hypothetical protein PRUPE_3G210000 [Prunus persica]	-	-	-	-	-	-	-	-	-	-	-	K10781|1|7e-09|62.0|lsv:111890372|fatty acyl-ACP thioesterase B [EC:3.1.2.14 3.1.2.21]	-	-	-
2089	PSS00054.1	Abscisic stress-ripening protein [Actinidia chinensis var. chinensis]	32202.6	0.456	9	20	-	0.78	0.802|0.719|0.855|0.805|0.734|0.840|0.777|0.665|0.797	0.061	9	1.215e-05	PSS00054.1	MAEEKHHHHHLFHHKEDDKPVDAVVYSETTYSSAEGDDESKTDGGYSRKSKTDEFGGYSSETKTGGFGDYGKSKTGGFGDCDESKTSGFGDYGESKTNEFGGYGGESKTGGFGDYGESKTGGFGYYDKSKTGGFGDYGESKTGGYGGYGGESKTGGFGDYDKSKTGGFGDYDKSKTGGIGDYGESKTGGFGDYGESKTKMYGTVELEPTQDYEKEVRHHKHQEYLGELGAGAAGAFAMYEKHKAEKDPEYAHKHKLEEEIAAAAAVGAGGYAFHEHHEKKEAKEEEEEAHGKKHHHLF	73.333	1e-41	AHJ09608.1	abscisic stress-ripening protein ASR [Camellia sinensis]	76.47	3e-21	sp|P37219|ASR2_SOLLC	Abscisic stress-ripening protein 2 OS=Solanum lycopersicum GN=ASR2 PE=4 SV=1	-	-	-	-	-	-	-	K20478|1|2e-15|81.6|mesc:110607907|golgin subfamily B member 1	GO:0006950//response to stress	-	-
2091	PSS17725.1	BTB/POZ domain-containing protein [Actinidia chinensis var. chinensis]	69045.7	0.01	1	1	-	0.71	0.340|1.054|1.160|0.265|0.816|0.875|0.269|0.787|0.865	0.339	9	0.04439	PSS17725.1	MKFMKLGSKPDAFQSEGNCIRYVSSELATDVIVNVAEVKFYLHKFPLLSKSNRLQKLAQKGNEESLDEIHLPDFPGGPKALEICAKFCYGVTVTLNAYNVVAARCAAEYLEMTEDVDRGNLIFKIEVFLNSSVFRCWKDSIIVLQTTASLLPWSEDLNVVARCIDSIVSKTFMEPSNVKWSYTYNRKLLVPDRIVEHGMKFESVPKDWWVEDICELDIDLYKRVLIAVRSKGKIDGNVIGEALKTYAVRWLPSSVDALAPEVHNGKNKCLVETIISLLPSDTSAGCSCSFLLKLLKFTILVGADGTQREDLIKRIGIKLDEASVNDLLIPARSPQTTKNDVELVQSLVNRFVVHEKCRRDADIAEKNEKIVSDSVLGYGSWFNVGKLIDGYLAEIAYDP…	75.083	0	XP_002285522.2	PREDICTED: BTB/POZ domain-containing protein NPY1 [Vitis vinifera]	55.12	0	sp|Q8H1D3|NPY1_ARATH	BTB/POZ domain-containing protein NPY1 OS=Arabidopsis thaliana GN=NPY1 PE=2 SV=1	-	-	-	-	-	-	-	-	GO:0060918//auxin transport;GO:0099402//plant organ development	GO:0004871//signal transducer activity	-
2101	PSS24810.1	Plastid-lipid-associated protein [Actinidia chinensis var. chinensis]	34471.2	0.5	7	12	-	0.82	0.759|0.973|0.571|0.794|1.002|0.584|0.919|1.132|0.662	0.197	9	0.02604	PSS24810.1	MAGASLFSQISCNSVLVTQPRSQFSLKPALFPANSVRFASVSTAAAAERAKISGGARRILRVRAVSEDKWGPEKDAGASVAVAEEEKRPTEVDLLKKQLVDSFYGTDRGLKATSETRAEVVELITKLEAMNPTPAPTEALTLLNGKWILAYTSFVGLYPLLSRTPPLVKVEEISQTIDSENFTVQNSVMFSGPLATTSISTNAKFEVRSPKRVQIKFEEGIIGTPKLTDSIVLPENVEFLGQKIDLAPLKGIITSVQDTASSVAKTISSQPPLKFSISNSNAESWLLTTYLDEELRISRGDAGSVFVLLKEGCSLLTR	73.313	2e-159	XP_018822923.1	PREDICTED: plastid-lipid-associated protein, chloroplastic-like [Juglans regia]	71.52	9e-159	sp|Q9ZWQ8|PAP_CITUN	Plastid-lipid-associated protein, chloroplastic OS=Citrus unshiu GN=PAP PE=2 SV=1	-	-	-	-	-	-	-	-		GO:0032440//2-alkenal reductase [NAD(P)] activity	-
2102	PSS30311.1	Glycerophosphodiester phosphodiesterase [Actinidia chinensis var. chinensis]	43086.4	0.084	2	2	-	0.71	0.645|0.736|0.518|0.670|0.788|0.538|0.830|0.967|0.681	0.142	9	0.0006076	PSS30311.1	MALKAVHVSDVPNLDQVPENASLALYSTRFSKGVDVGRGGIKIPKFLVIGHRGSGMNMLQSSDRRMKAMKENSVLSFNAAAKFAVDFIEFDVQVTKDDCPVIFHDNFILSEDNGTVYEKRVTELSLSEFLCYGPQREPGKVGKTLLRKTKDGQILSWNVEKDDPLCTLEEAFHKVSPSVGFNIELKLDDHIVYQQEHLIHVVQAILKVVFEHDKDRPIIFSTFQPDAALLVRKLQSTYPVFFLTNGGTEIYYDVRRNSLDEAMKLCLQGGLQGIVSEVKGIFRNPGAIPKIKEAKLSLLTYGKLNNVPEAVYMQHLMGVEGVIVDLVQEIAEAVSYMIKPSMEEGEEEVLGKGEGQIQVKAKPQFSERELSFLLKLIPELMQL	80.311	0	XP_021823099.1	glycerophosphodiester phosphodiesterase GDPD1, chloroplastic-like [Prunus avium]	63.97	1e-177	sp|Q9SGA2|GDPD1_ARATH	Glycerophosphodiester phosphodiesterase GDPD1, chloroplastic OS=Arabidopsis thaliana GN=GDPD1 PE=1 SV=1	At3g02040	498	3e-177	KOG2421	Predicted starch-binding protein	R	General function prediction only	K18696|1|0.0|646|pavi:110764432|glycerophosphodiester phosphodiesterase [EC:3.1.4.46]	GO:0006629//lipid metabolic process;GO:0046475//glycerophospholipid catabolic process;GO:0030643//cellular phosphate ion homeostasis	GO:0008889//glycerophosphodiester phosphodiesterase activity;GO:0008081//phosphoric diester hydrolase activity	GO:0005623//cell
2103	PSS24201.1	CMP-sialic acid transporter 1 like [Actinidia chinensis var. chinensis]	37889.7	0.084	1	1	-	0.72	0.971|0.664|0.786|0.731|0.538|0.583|0.869|0.593|0.702	0.142	9	0.0006181	PSS24201.1	MQWYVVAALLTILTSSQGILTTLSQSNGGYKYDYATVPFLAEVFKLVVSGFLLWREIKTSTPPRMTTDWKSVRLYPIPSIIYLIHNNVQFATLTFVDTTTYQIMGNLKIVTTAILFRLFLKRRLSNLQWMAIVLLAVGTTTSQVKGCGEASCDSLLSSPIQGYMLGILSACLSALAGVYTEFLMKKNNDSLYWQNLQLYTFGTIFNMARLVLDDFRGGFEKGPWWQRIFNGYSIMTFMVVLNLGSTGLLVSWLMKYADNIVKVYSTSMAMLLTMVLSIVFFNFRPTLQLFLGIIVCMMSLRMYFAPANMLLDLPLTAKAAPQTGIEVSVDRKSDS	85.97	0	XP_010266434.1	PREDICTED: CMP-sialic acid transporter 1-like isoform X1 [Nelumbo nucifera]	78.81	0	sp|Q8LGE9|CSTR1_ARATH	CMP-sialic acid transporter 1 OS=Arabidopsis thaliana GN=At5g41760 PE=2 SV=1	At5g41760	520	0	KOG2234	Predicted UDP-galactose transporter	G	Carbohydrate transport and metabolism	K15272|1|0.0|606|oeu:111409953|solute carrier family 35 (UDP-sugar transporter), member A1/2/3		GO:0005351//sugar:proton symporter activity	GO:0016021//integral component of membrane;GO:0000139//Golgi membrane
2122	PSR84517.1	Thylakoid lumenal protein [Actinidia chinensis var. chinensis]	25104.2	0.306	2	4	-	0.68	0.918|0.721|0.623|0.740|0.603|0.492|0.819|0.631|0.544	0.135	9	0.0002633	PSR84517.1	MATLFLSTAKTFLPILLSSPPPSSPTPTLPVLAHKHNPRPQLSQCRAVSDSPPPPPYPPILTKRSLSLSLTSTFLVSIAGQLGHSAANAAILEADDDEELLERVKKDRKKRLERQGVISSFNKERAYLQDLVYQLSKVGQAIENNDLTAASSVLGQSIDTDWVQKANLAFTKFSSSSEEKTEIDTFNTSLASLISSVVQKDIEASKLAFVSSASAFEKWTALTGLVGQLKGL	70.213	7e-103	XP_015901935.1	PREDICTED: thylakoid lumenal 16.5 kDa protein, chloroplastic [Ziziphus jujuba]	67.63	6e-74	sp|O22773|TL16_ARATH	Thylakoid lumenal 16.5 kDa protein, chloroplastic OS=Arabidopsis thaliana GN=At4g02530 PE=1 SV=3	-	-	-	-	-	-	-	-	-	-	-
2126	PSS35781.1	NADH--cytochrome b5 reductase [Actinidia chinensis var. chinensis]	31213	0.134	2	2	-	0.8	0.742|0.857|0.871|0.743|0.855|0.848|0.716|0.799|0.810	0.058	9	1.903e-05	PSS35781.1	MDLLETADTKILGVAIAILATVFAAAYFFSSKKPKGCLDPENFKEFKLVTRTQLSHNVAKFRFELSSPTSVLGLPIGQHLSCRGKDNQGEEVIKPYTPTTLDSDVGHFELVIKMYLQGRMSHHFREMRVGDYLAVKGPKGRFRYQPGQVRAFGMLAGGSGITPMFQVTRAILENPKDKTKVHLIYANVTFEDILLKEELDGLAANYPDRFKIYYVLNQPPEVWNGGVGFVSKEMIQTYCPAPAPDIQILRCGPPPMNKAMAAHLEALKYAPEMQFQF	87.05	0	XP_021685317.1	NADH--cytochrome b5 reductase 1-like [Hevea brasiliensis]	80.58	2e-164	sp|Q9ZNT1|NB5R1_ARATH	NADH--cytochrome b5 reductase 1 OS=Arabidopsis thaliana GN=CBR1 PE=1 SV=1	At5g17770	457	3e-164	KOG0534	NADH-cytochrome b-5 reductase	HC	Coenzyme transport and metabolism;Energy production and conversion	K00326|1|0.0|513|hbr:110668413|cytochrome-b5 reductase [EC:1.6.2.2]	GO:0022900//electron transport chain	GO:0004128//cytochrome-b5 reductase activity, acting on NAD(P)H	GO:0005783//endoplasmic reticulum;GO:0016021//integral component of membrane;GO:0005886//plasma membrane;GO:0009505//plant-type cell wall
2127	PSS14214.1	Proliferating cell nuclear antigen [Actinidia chinensis var. chinensis]	29615.6	0.356	1	2	-	0.73	0.723|0.708|1.000|0.724|0.745|0.996|0.547|0.475|0.686	0.175	9	0.003128	PSS14214.1	MLELRLVQGSLLKKVLESIKDLVNDANFDCSATGFSLQAMDSSHVALVALLLRSEGFEHYRCDRNMSMGMNLNNMAKMLKCAGNDDIITLKADDGSDTVTFMFESPTQDKIADFEMKLMDIDSEHLGIPEAEYHAIVRMPSSEFSRICKDLSSIGDTVVISVTKEGVRFSTRGDIGTANVVCRQNTTVDKPEEATIIEMNEPVSLTFALRYMNSFTKATPLSNTVTISLSSELPVVVEYKIAEMGYVRFYLAPKIEEDDEETKP	97.348	0	XP_011089409.1	proliferating cell nuclear antigen [Sesamum indicum]	96.59	0	sp|O82797|PCNA_TOBAC	Proliferating cell nuclear antigen OS=Nicotiana tabacum GN=PCNA PE=2 SV=1	At2g29570	500	0	KOG1636	DNA polymerase delta processivity factor (proliferating cell nuclear antigen)	L	Replication, recombination and repair	K04802|1|0.0|536|sind:105170370|proliferating cell nuclear antigen	GO:0006272//leading strand elongation;GO:0019985//translesion synthesis;GO:0006298//mismatch repair;GO:0006275//regulation of DNA replication;GO:0006260//DNA replication	GO:0030337//DNA polymerase processivity factor activity;GO:0003677//DNA binding	GO:0005634//nucleus;GO:0043626//PCNA complex
2133	PSS09414.1	Ribulose bisphosphate carboxylase/oxygenase activase [Actinidia chinensis var. chinensis]	48972.6	0.768	14	129	-	0.79	1.000|0.775|0.755|0.937|0.735|0.695|0.912|0.677|0.664	0.124	9	0.001412	PSS09414.1	MTSTVSTVPAVNRTLLSLNSSNSGGYVPSSAFRGSGLKKVVSSRYSRSKTLSKNFKIKAEINEEQQTDKDRWRGLAYDISDDQQDITRGKGMVDSLFQAPTGAGTHDAIMSSYEYLSTGLRQYMDNTMEGFYIAPAFMDKLVVHITKNFMTLPNIKVPLILGVWGGKGQGKSFQCELVFSKMGINPIMMSAGELESGNAGEPAKLIRQRYREAADIIRKGKMCCLFINDLDAGAGRMGGTTQYTVNNQMVNATLMNIADNPTNVQLPGMYNKEENPRVPIIVTGNDFSTLYAPLIRDGRMEKFYWAPTREDRIGVCTGIFRTDNVPPEEIVKLVDTFPGQSIDFFGALRARVYDDEVRKWISGVGVNSIGKKLVNSKEGPPTFEQPKMTLEKLLEYGNM…	87.045	0	XP_003632187.1	PREDICTED: ribulose bisphosphate carboxylase/oxygenase activase, chloroplastic isoform X2 [Vitis vinifera]	83.83	0	sp|O98997|RCA_VIGRR	Ribulose bisphosphate carboxylase/oxygenase activase, chloroplastic OS=Vigna radiata var. radiata GN=RCA PE=2 SV=2	At2g39730	725	0	KOG0651	26S proteasome regulatory complex, ATPase RPT4	O	Posttranslational modification, protein turnover, chaperones	K02960|1|2e-51|181|cpap:110817833|small subunit ribosomal protein S16e!K03064|2|1e-06|55.1|gmx:100817206|26S proteasome regulatory subunit T4		GO:0005524//ATP binding;GO:0046863//ribulose-1,5-bisphosphate carboxylase/oxygenase activator activity	GO:0009579//thylakoid;GO:0009570//chloroplast stroma
2205	PSS31202.1	Vitamin K-dependent protein like [Actinidia chinensis var. chinensis]	37453.3	0.16	4	5	-	0.76	0.709|0.809|0.883|0.846|0.755|0.783|0.725|0.614|0.685	0.084	9	6.38e-05	PSS31202.1	MSSLTVELSILSKSSSPSPVLVSCRSLGLCSSVRFPRKIHNRRIFTLRALSSDSSQNSGDINGNNTSNAGDTKPPNGTMPKGRRDMLLEYVKNVQPEFMELFVKRAPQQVVDAMRQTVTNMIGTLPPQFFAVTVTTVAENLAQLMYSVLMTGYMFKNAQYRLELQQSLEQVALPEVQDKKDVPDYAPGTQKKVSGEVIRWSNVSGPEKIDAVKYIELLEAEIEELHAQVGRKSSNGHNELLEYLKSLEPQNLKELTSSAGEDAVLAMNTFIKRLLAVADPAQMKTSVTETSAAELAKLLYWLMVVGYSIRNIEVRFDMERVLGTPPKLAELPPGENI	79.706	0	XP_006435338.1	hypothetical protein CICLE_v10001788mg [Citrus clementina]	-	-	-	-	-	-	-	-	-	-	-	-	-	-	-
2252	PSS31429.1	ABSCISIC ACID-INSENSITIVE 5-like protein [Actinidia chinensis var. chinensis]	45551.6	0.053	1	1	-	0.72	0.533|0.555|0.730|0.660|0.695|0.881|0.724|0.729|0.960	0.137	9	0.0005879	PSS31429.1	MGTNMNFKNYGSEPPSANGVGRPPEDFPLARQQSIYSLTFDEFQSTVGGSGKDFGSMNMDELLKNIWSAEETQTMGSTNCGQESVAPGGYLQRQGSLTLPRTLSQKTVDEVWRDIATGGGGDSNLPQRQQTLKEITLEEFLVRAGVVREEIQLPGKTSNSGFFGDLSRPGNDSALGFGFQQMGQHTGLSNSNQIQNPIQSANLPVNVNGVRSTQQQMYIPQPQQQQQQQQPPSIFPKQLNLAYANPIPISNGSPGIRSGIVGNMDSPMNGNLVQGGGMGMIGLGTGGAVTVATVSPVMPSDGRGKSNGNLSSVSPVPYVFNGGLRGRKSGNAVEKVVERRQRRMIKNRESAARSRARKQAYTTELEEEVAKLKEENQELRTRQVEIMEMQKNQVLEMMN…	69.369	0	AGG39700.1	bZIP transcription factor bZIP8 [Camellia sinensis]	53.11	3e-118	sp|Q9M7Q4|AI5L5_ARATH	ABSCISIC ACID-INSENSITIVE 5-like protein 5 OS=Arabidopsis thaliana GN=ABF2 PE=1 SV=1	7301826	49.7	5e-06	KOG1414	Transcriptional activator FOSB/c-Fos and related bZIP transcription factors	K	Transcription	K14432|1|6e-168|481|nto:104089140|ABA responsive element binding factor		GO:0003700//DNA binding transcription factor activity;GO:0003677//DNA binding	-
2260	PSS21217.1	DNA repair protein [Actinidia chinensis var. chinensis]	17055.8	0.104	2	3	-	0.81	0.872|0.687|0.945|0.898|0.718|0.953|0.784|0.611|0.834	0.12	9	0.002675	PSS21217.1	MDKKARKESKISRYFKAPFRVLAKAHDFYINSLIQCAGRAEFGGAMTGPTAQVSSSLPKSFSVNSSKASDDQDLRDLIRAASTRSLSNKVQLELLRRQQLPVAAVEVVPRSQSAGIGRIDEDKPCEFEEGDVKVNTDVYPRSKSYAVSKRTTGL	65.584	5e-55	XP_010647287.1	PREDICTED: uncharacterized protein LOC104878482 [Vitis vinifera]	-	-	-	-	-	-	-	-	-	-	-	-	-	-	-
2278	PSR96061.1	COBW domain-containing protein [Actinidia chinensis var. chinensis]	50191.5	0.47	4	5	-	0.68	0.797|0.635|0.754|0.721|0.594|0.667|0.815|0.557|0.610	0.093	9	2.566e-05	PSR96061.1	MASMSIDIAATFIGLAKRHTIPLCSVRTSVFPFLSRIKTHNPQSLRAIAPKPRNGIFSIDLPKSKRFSRGFAVPSATATPQAESWETKIPADDRIPATIITGFLGSGKTTLLNHILTADHGKRIAVIENEYGEVDIDGSLVAAKAAGTEDIVMLNNGCLCCTVRGDLVRMIAELVSKKKGRFDHIVIETTGLANPAPIIQTFYAEDQIFNEVKLDGVVTLVDAKHAGFHLDDVKPKGVVNEAVEQIAYADRIIVNKTDLVGEPQVSSLIQRIRNINSMANLKQTQFGKVDLDYVLGIGGFDLERIESAVNTEDSKENHDSHGHDHEHDHHHDHDHKHEHDDHHHSHDHTHDPGVSSVSIVCEGNLDLEKANMWLGTLLMERSDDIYRMKGLLCIEGMDE…	77.996	0	XP_009792838.1	PREDICTED: COBW domain-containing protein 1-like [Nicotiana sylvestris]	-	-	-	-	At1g80480	563	0	KOG2743	Cobalamin synthesis protein	H	Coenzyme transport and metabolism	K21594|1|2e-23|108|csl:COCSUDRAFT_47382|translation factor GUF1, mitochondrial [EC:3.6.5.-]	-	-	-
2280	PSR95007.1	Root phototropism protein [Actinidia chinensis var. chinensis]	64464.4	0.012	1	1	-	0.75	0.863|0.474|0.571|0.729|0.443|0.476|1.408|0.796|0.959	0.31	9	0.02319	PSR95007.1	MAAASIKNNNRLSLVMERTGRRVSQEIPTDVVIEVGEVNFNLHKFMLVEKSNYIRKLIIDSKEPDLSRINLSDIPGGPESFEKAAKFCYGVNFEITVYNVAALRCAAEYLQMTDEYSDVNLASRTEEFLSQVALTSLTAAVVVLKSCEDLLPMAEEIKIVQRCVDVASTKACNEALFPSTSPTNWWTAELSILNIAFFEKIIAGMKSCGAKASTIASVIVTYAETWLRDLVRDHSGTGKTSSYPSDPDARFGQPDLLESIVKLLPADTAALPIGFLCCLLRTAIFLRASTSTKHELERRVAAVLEHVTVDDLLVLSFTYDGERLFDLESVRRIVAGFVERGKRVAVFNASDFSEMCSAGMVRVAKTMDAYLGEVATCSELSISKFNGIANLVPKEARKI…	74.468	0	XP_011089543.1	root phototropism protein 2-like [Sesamum indicum]	63.7	0	sp|Q682S0|RPT2_ARATH	Root phototropism protein 2 OS=Arabidopsis thaliana GN=RPT2 PE=1 SV=2	-	-	-	-	-	-	-	-	GO:0009638//phototropism	GO:0004871//signal transducer activity	-
2289	PSR96566.1	Translation initiation factor eIF-2B subunit delta like [Actinidia chinensis var. chinensis]	71958.5	0.061	1	1	-	0.71	0.569|0.611|0.646|0.671|0.740|0.750|0.748|0.791|0.837	0.088	9	3.157e-05	PSR96566.1	MDPPRRTSRVIDPKVRHVGFFAPLSPGRTQSGPPAPAAPSPVSGSPSGNSLSPVMIPPPRHASDNLSSALALHQPPSRPVSVPVTSAVRRPSIDNVAVVGSYNQSETVLATSPSAISPSSRIGDGEFSEDSLNWIRRTNSGKFSSSVPTGGFDLAVKKAQEVFEKGGGKGPVISNELASNAKPLKDKMTKAERRAMQESQRAAKAAAKGSSSAKEGRKPAAASGVAPFHEQTAKGVKQPSQKKDIPPVAPSIAASEKKGGDRPPEKDRKKDVPPPRMQFDDKNRVEKAKRRAVVKQTEARNRVELFRHLPQYEHGTRLPDLEAKFFQLDPMHPAVYKVGLQYLAGDVFGGNARCIAMLQAFREAINDYCTPAEKTLARDLTAKINSYVSYFIECRPLSI…	71.025	0	XP_010663536.1	PREDICTED: translation initiation factor eIF-2B subunit delta isoform X3 [Vitis vinifera]	-	-	-	-	At5g38640	748	0	KOG1467	Translation initiation factor 2B, delta subunit (eIF-2Bdelta/GCD2)	J	Translation, ribosomal structure and biogenesis	K03680|1|0.0|925|rcu:8264540|translation initiation factor eIF-2B subunit delta	GO:0044237//cellular metabolic process	GO:0003743//translation initiation factor activity	-
2292	PSS05942.1	FMRFamide receptor like [Actinidia chinensis var. chinensis]	68204.8	0.163	7	10	-	0.83	0.808|0.871|0.622|0.850|0.933|0.642|0.955|1.061|0.733	0.146	9	0.01048	PSS05942.1	MVVLQLHLHQHPPISGGVYQNAHAIPPIVRSRNLSFKAQALPSRTQRIMESISVGGEVGGAGGAYSYEALKRLDQFWSSLCSAQTVVQEPQKVVSSLPGLFSPSDPAGKAVETFDVLVCGGTLGMFIATALSCKGLRVGVVERGILKGREQEWNISRKELLELVEVGIMTEDDIEQATSAIFNPNRCGFEGKGEIWVEDILNLGVSPAKLVEVMKKRFDTLGGIIFEGYSVSGICVYEDAAVLQLAEGKILSSRLIIDAMGNFSPVVRQIRSGRKPDGVCLVVGSCCRGFKDNSTSDVIFSSSAVKKVGDSVSQYFWEAFPAGSAPVDRTTYMFTYVDPQPGCPKLEELLEDYWDLMPKYQRVSLDSLEILRVIFGIFPTFRDSPLPAAFDRVLQFGDA…	81.601	0	XP_002273536.1	PREDICTED: uncharacterized protein LOC100241486 [Vitis vinifera]	-	-	-	-	-	-	-	-	-	-	-	-			GO:0009507//chloroplast
2293	PSS01368.1	Plastidal glycolate/glycerate translocator 1 like [Actinidia chinensis var. chinensis]	56405.2	0.025	1	1	-	0.82	0.917|0.840|0.819|0.813|0.755|0.711|0.899|0.811|0.789	0.064	9	5.396e-05	PSS01368.1	MAIASAIPQTLTLSLPNHHPSRFSTLNYLIPPKKSHRIHLPVAFNGFQISHSSRNFCETALPIRALGHNSKFLQVGPFETRSTRRIQAKSMGSDNNFASTSLQTVFDAMHLIVSLGIVLAIDKALKKAFVAAAIKFPSALFGMFCVFTILMVLDSTVPDAATSLMNFFDPALMFIQRWLPLFYVPSLVVLPLAVKDIPASSGVKICFILVGGWLASLSVAGYTAIAVRKLVKTEMIPAEPMSKPSPFSPLELWAWSGIFLVSFTVALLYPTALGTGARTCLPFLLASTVLGYMVGSGLPSDVKKVFHPIICCALSADLAALAFGYFSRSGIDPVLGYYLTKVSSDPGAGNILMGFLGSVIISFAFSMFKQRKLVKRHSAEIFTSVIVATIFSLYSTALI…	79.098	0	XP_002519004.1	PREDICTED: plastidal glycolate/glycerate translocator 1, chloroplastic [Ricinus communis]	77.56	0	sp|Q9FVQ4|PLGG1_ARATH	Plastidal glycolate/glycerate translocator 1, chloroplastic OS=Arabidopsis thaliana GN=PLGG1 PE=1 SV=1	-	-	-	-	-	-	-	-			GO:0016021//integral component of membrane
2300	PSR88066.1	Nuclease [Actinidia chinensis var. chinensis]	58627.4	0.073	3	6	-	0.78	0.717|0.707|0.792|0.763|0.819|0.946|0.771|0.715|0.778	0.073	9	2.863e-05	PSR88066.1	MSVNPTFVDEDASSGSGEDATMLDGHNKRQSITPSSGCRKRSRKATGDAIVDAMLEIAAASKMRATEIMKNEDRFSISKCIKVLDEMQGVDQRLYFLALDLFENPNARETFIALKDLLAAMDDVDLELDEMELVAAAAGYYYYNSITKQPRRSESPSGTRFLNEVLTGEDDVCRDMFRMDKHVFHKLSDTLRQKGMLRDTPGVMIEEQLAIFLNIVGHNERNRVIQERFQHSGETISRHFNNVLKAIKSLSREFLQPPPLSTPPEILRSNRFYPYFQDCIGVIDGMHLPAHVPAKDQSRFRNKKGVLSQNVLAACTFDLQFIFIYPGWEGSVTDSRVLRAVLDDPDQNFPQIPEGKYYLVDWGYSNTEGFIAPFQGIRYHIQEYRGAHLLPRNAKELFN…	77.326	0	XP_021666656.1	uncharacterized protein LOC110654837 [Hevea brasiliensis]	24.81	2e-09	sp|Q9M2U3|ALPL_ARATH	Protein ALP1-like OS=Arabidopsis thaliana GN=At3g55350 PE=2 SV=1	At5g41980	301	5e-98	KOG4585	Predicted transposase	L	Replication, recombination and repair	K02218|1|7e-74|254|sbi:8069780|casein kinase 1 [EC:2.7.11.1]!K05291|2|3e-28|124|peq:110027358|phosphatidylinositol glycan, class S!K14318|3|1e-22|107|aof:109831087|nuclear pore complex protein Nup88!K00430|4|3e-21|98.6|psom:113351909|peroxidase [EC:1.11.1.7]!K07904|5|1e-19|91.7|ccav:112505501|Ras-related protein Rab-11A	-	-	-
2315	PSR95074.1	Proliferating cell nuclear antigen [Actinidia chinensis var. chinensis]	29629.6	0.356	1	1	-	0.73	0.656|0.688|0.823|0.887|0.922|1.098|0.464|0.456|0.545	0.222	9	0.008356	PSR95074.1	MLELRLVQGSLLKKVMESIKDLVNDANFDCSATGFSLQAMDSSHVALVALLLRSEGFEHYRCDRNISMGMNLNNMAKMLKCAGNDDIITLKADDGSDTVTFMFESPTQDKIADFEMKLMDIDSEHLGIPEAEYHAIVRMPSSEFSRICKDLSSIGDTVVISVTKEGVRFSTRGDIGTANVVCRQNTTVDKPEEATIIEMNEPVSLTFALRYMNSFTKATPLSNTVTISLSSELPVVVEYKIAEMGYIRFYLAPKIEEDDEETKP	97.348	0	XP_011089408.1	proliferating cell nuclear antigen [Sesamum indicum]	96.97	0	sp|O82797|PCNA_TOBAC	Proliferating cell nuclear antigen OS=Nicotiana tabacum GN=PCNA PE=2 SV=1	At2g29570	500	0	KOG1636	DNA polymerase delta processivity factor (proliferating cell nuclear antigen)	L	Replication, recombination and repair	K04802|1|0.0|537|sind:105170369|proliferating cell nuclear antigen	GO:0006272//leading strand elongation;GO:0019985//translesion synthesis;GO:0006298//mismatch repair;GO:0006275//regulation of DNA replication;GO:0006260//DNA replication	GO:0030337//DNA polymerase processivity factor activity;GO:0003677//DNA binding	GO:0005634//nucleus;GO:0043626//PCNA complex
2322	PSS29107.1	Mitotic spindle checkpoint protein [Actinidia chinensis var. chinensis]	82341.5	0.039	2	2	-	0.76	0.631|0.686|0.715|0.801|0.867|0.892|0.715|0.753|0.785	0.085	9	6.791e-05	PSS29107.1	MILRTPPPKKRRAPESPNSGRQLVIYEDSPAPESSHEHSEQMLCTYQCRQMVKSEFFEALSSAEKQAHDYQSKFEALNDDFSKAETERKKLRDQFFRAEQELAATKGREQALQEQLLKEVNVSQERISKQIKAYSELEVKFQSEINLRKKAESLAALAEEKASLLEGKLSHLSATIEREKTRLREDLVQMESQSKLSVSRISLDLERMECRANNAEKELVLLKQQFEDLKKRLNESLHQKNELEKKLSSFTFQEIPSTQSDMLVKHLREELRTYESEVQEARKLKSSHESIELLKEKLLEEKRRRERAESDLHKLSEIELSMRKVEDELSAWKMLVRDIPGVSHAEDIPLKLAALQKEVIESMVMVGEANARLKQIEVSLDAAELGKQNAEAEAALATE…	75.314	0	XP_002269253.1	PREDICTED: mitotic spindle checkpoint protein MAD1 [Vitis vinifera]	62.48	0	sp|Q9LTY1|MAD1_ARATH	Mitotic spindle checkpoint protein MAD1 OS=Arabidopsis thaliana GN=MAD1 PE=1 SV=1	At5g49880	881	0	KOG4593	Mitotic checkpoint protein MAD1	D	Cell cycle control, cell division, chromosome partitioning	K06679|1|0.0|1027|vvi:100262667|mitotic spindle assembly checkpoint protein MAD1	GO:0007094//mitotic spindle assembly checkpoint;GO:0051315//attachment of mitotic spindle microtubules to kinetochore		GO:0072686//mitotic spindle;GO:0005635//nuclear envelope;GO:0000776//kinetochore
2326	PSS02818.1	4-hydroxybenzoate polyprenyltransferase [Actinidia chinensis var. chinensis]	35776.6	0.04	1	2	-	0.81	0.804|0.873|0.684|0.978|1.055|0.807|0.724|0.758|0.592	0.144	9	0.005025	PSS02818.1	MAWFRLPRAYLRTLQQQQQPLSHRLDSLSSSRPLSHYIFPPPNPTNPNPNPNPNPNHDSSSFSLSPIKPFGYKSRFNLEIGHFNSSLAGQIQNACISTSSGVAEKEGSKTNGDDASKTVDTSWIDLYLPKKAQPYARLARLDKPIGTWLLAWPCFWSITLAASPGNPPDIKLLTLFGCGALLLRGAGCTVNDLLDRDIDTKVERTKLRPVASGVLTPFQGICFLGFQLLLGLGILLQLNNYSRVLGASSLLLVFSYPLMKRLTFWPQAFLGLTFNWGALLGWSAVKGSLDPAVVFPLYISGVFWTLVYDTIYAHQVQMFLS	71.481	6e-131	XP_007212529.1	4-hydroxybenzoate polyprenyltransferase, mitochondrial isoform X2 [Prunus persica]	64.31	6e-103	sp|Q93YP7|COQ2_ARATH	4-hydroxybenzoate polyprenyltransferase, mitochondrial OS=Arabidopsis thaliana GN=PPT1 PE=2 SV=1	7299020	253	1e-81	KOG1381	Para-hydroxybenzoate-polyprenyl transferase	H	Coenzyme transport and metabolism	K06125|1|1e-131|384|pper:18781045|4-hydroxybenzoate polyprenyltransferase [EC:2.5.1.39]	GO:0006744//ubiquinone biosynthetic process;GO:0008299//isoprenoid biosynthetic process	GO:0002083//4-hydroxybenzoate decaprenyltransferase activity;GO:0047293//4-hydroxybenzoate nonaprenyltransferase activity	GO:0031305//integral component of mitochondrial inner membrane
2333	PSR95422.1	Elongation factor 1-beta 2 like [Actinidia chinensis var. chinensis]	24708.5	0.487	3	7	-	0.81	0.845|0.934|0.939|0.887|0.905|0.868|0.640|0.633|0.642	0.132	9	0.004685	PSR95422.1	MAITFSDLHTESGLKSLDEFLSGKTYVSGDQLTKDDIKVYAAVLEKPNGDLFPNASQWYHCVSSKLATSFPGKAVGVRTAGQAALVEAAPAKVEKEAPAGDDDDDLDLFGDETEEEKKAAEQREAAKAPAKKKESGKSSVLLDVKPWDDETDMKKLEESVRSIEMPGLLWGASKLVPVGYGIKKLQIMMTIVDDLVSVDTLIEERLTVEPINEYVQSCDIAAFNKI	80.531	1e-120	XP_007146187.1	hypothetical protein PHAVU_006G019800g [Phaseolus vulgaris]	72.93	1e-102	sp|Q84WM9|EF1B1_ARATH	Elongation factor 1-beta 1 OS=Arabidopsis thaliana GN=At5g12110 PE=2 SV=2	At5g12110	296	2e-102	KOG1668	Elongation factor 1 beta/delta chain	K	Transcription	K03232|1|2e-121|347|pvu:PHAVU_006G019800g|elongation factor 1-beta		GO:0003746//translation elongation factor activity	GO:0005853//eukaryotic translation elongation factor 1 complex
2342	PSR98866.1	Histone H2B like [Actinidia chinensis var. chinensis]	14858.2	0.37	5	22	PSR95130.1;PSR86690.1;PSR86682.1;PSS14261.1;PSR90054.1	0.82	0.932|0.881|0.896|0.782|0.791|0.746|0.808|0.773|0.789	0.064	9	5.387e-05	PSR98866.1	MAAKAGKKPAAEKAPAAEKKPRAEKKLPKETSTGEKKKKRSKKSVETYKIYIFKVLKQVHPDIGISSKAMGIMNSFINDIFEKLAQEASRLARYNKKPTITSREIQTAVRLVLPGELAKHAVSEGTKAVTKFTSS	92.366	1e-74	KVI05050.1	Histone core [Cynara cardunculus var. scolymus]	90.84	1e-74	sp|O65819|H2B3_SOLLC	Histone H2B.3 (Fragment) OS=Solanum lycopersicum GN=H2B-3 PE=2 SV=1	At2g28720	218	3e-74	KOG1744	Histone H2B	B	Chromatin structure and dynamics	K11252|1|2e-75|224|ccav:112524532|histone H2B		GO:0003677//DNA binding;GO:0046982//protein heterodimerization activity	GO:0005634//nucleus;GO:0000786//nucleosome
2387	PSR84965.1	Fruit protein like [Actinidia chinensis var. chinensis]	14797.7	0.052	1	4	PSR84967.1	0.5	0.669|0.480|0.450|0.662|0.475|0.432|0.564|0.389|0.364	0.111	9	8.705e-06	PSR84965.1	MDQLLPPEAYPTVLLFTTGYGIGPVRSLIKTGFSANKRSDVRLYYGVENLQKLAYQDEFEDWEKSGVDVIPVLSDPPANWNGATGHVQNVYLKDKPIANPKAAVAVLSGNQNMIEDTKAILLAQGFSAEKILETK	65.926	8e-60	P43394.1	RecName: Full=Fruit protein pKIWI502	65.93	5e-62	sp|P43394|K502_ACTDE	Fruit protein pKIWI502 OS=Actinidia deliciosa GN=pKIWI502 PE=2 SV=1	-	-	-	-	-	-	-	K20784|1|4e-16|78.2|vcn:VOLCADRAFT_106094|arabinosyltransferase [EC:2.4.2.-]		GO:0016491//oxidoreductase activity	-
2393	PSR92631.1	Transcription termination factor like [Actinidia chinensis var. chinensis]	44277.2	0.023	1	1	-	0.62	0.277|0.707|0.741|0.246|0.664|0.632|0.392|0.925|0.968	0.262	9	0.008379	PSR92631.1	MYSLICKSSHHITSSIRASPTHSLCFLQTHRFSSSLSSTDHTPNQHSFAVNYLVNSCGFPLEKALSASKYTNFETPNKPDSVLEFFGNHGFTKTQVSKLIRGSPPVLLCNPEKTLLPKIDFLKSKGVSSKDVIKILSTGPTIFRRSLENQIIPSFDLLKKLIQSEEKTIAAIKRFPGLLLFDLDTCLLPNIEILREAGVPDANIVVLLTYQPRAFMTSCDKFRESVEKVEEMGFNPLRSKFVLAVHALRAMSKLKWEKKVEAYKKWGWSEDEILVAFGKHPWCMTWSEDKIARVMDFFVNNMGWESSLVANRPVLMSLSFEKRIVPRCAVYQALFSKGLIKKTDISLVKMLESRECWFLEKVVNGYKEEAPKLLKLYKEKLALAN	55.108	6e-143	XP_002276393.1	PREDICTED: uncharacterized protein LOC100240766 [Vitis vinifera]	21.34	2e-10	sp|Q9FK23|MTEF8_ARATH	Transcription termination factor MTERF8, chloroplastic OS=Arabidopsis thaliana GN=MTERF8 PE=1 SV=1	At5g07900	298	3e-98	KOG1267	Mitochondrial transcription termination factor, mTERF	KR	Transcription;General function prediction only	K15032|1|1e-143|417|vvi:100240766|mTERF domain-containing protein, mitochondrial	-	-	-
2417	PSS04380.1	Sec-independent protein translocase protein like [Actinidia chinensis var. chinensis]	27626.1	0.11	2	3	-	0.76	0.909|0.728|0.884|0.656|0.584|0.634|0.877|0.726|0.873	0.124	9	0.0009526	PSS04380.1	MTTHMASAISSPSYLCLSPSTSKYSPLCALSSSTKSYPKTQIICLHKCIPQLGLGQFSRSNGLRHLGMSISQRSVKRERKRKIYASLFGVGAPEALVIGVVALLVFGPKGLAEVARNLGKTLRAFQPTIKELQDVSREFKSTLEREIGLDEIQSSTQNTYSSTKTSTTPSPSSIASPEASQTVADPNGAPSPNRAYSTEDYLKITEEQLKASAAQQQTQTSSTPGESQLEPQTQTQDVQEAAAAIPPNQQPKSEI	63.813	5e-96	XP_018833492.1	PREDICTED: sec-independent protein translocase protein TATB, chloroplastic isoform X2 [Juglans regia]	54.58	1e-78	sp|Q94G16|TATB_PEA	Sec-independent protein translocase protein TATB, chloroplastic OS=Pisum sativum GN=TATB PE=1 SV=1	-	-	-	-	-	-	-	K03116|1|5e-32|116|smo:SELMODRAFT_36640|sec-independent protein translocase protein TatA	GO:0009306//protein secretion	GO:0008565//protein transporter activity	GO:0016021//integral component of membrane;GO:0005886//plasma membrane
2418	PSS01115.1	ATP synthase subunit b' like [Actinidia chinensis var. chinensis]	23066.2	0.351	2	5	-	0.83	1.310|0.930|0.853|0.880|0.671|0.590|0.960|0.653|0.619	0.229	9	0.03628	PSS01115.1	MANMIMASSSKTLIPPPSSSTPKPKHLQFPKFPKPQLTSLSTPTSLKSLAAVAVAAMAAAPPSLAEEFEKAALFDFNLTLPIIMAEFLFLMVALDKVWFSPLGKFMDDRDAQIREMLSGVKDTSSEVKELEDKATAVMRAARAEIAAALNVMKKETTEEVERRLAEGQRKVEAELKEALGNLERQKDETIKALDSQIAALSEDIVKKVLPL	64.444	1e-90	XP_015937582.1	ATP synthase subunit b', chloroplastic [Arachis duranensis]	69.36	3e-79	sp|P31853|ATPX_SPIOL	ATP synthase subunit b', chloroplastic OS=Spinacia oleracea GN=ATPG PE=1 SV=2	-	-	-	-	-	-	-	K02109|1|2e-91|271|aip:107612697|F-type H+-transporting ATPase subunit b	GO:0015986//ATP synthesis coupled proton transport	GO:0015078//hydrogen ion transmembrane transporter activity	GO:0045263//proton-transporting ATP synthase complex, coupling factor F(o);GO:0016021//integral component of membrane
2420	PSS00232.1	Mitochondrial import receptor subunit TOM9-2 like [Actinidia chinensis var. chinensis]	11504.1	0.211	2	2	-	0.82	0.787|0.757|1.253|0.666|0.650|1.036|0.639|0.604|0.973	0.222	9	0.02613	PSS00232.1	MASQGGKRLSLSRSSSSENEGILSRISSGVSQSPVVYRGKRAAADAAYVAKRLLKSTGKAAWIAGTTFLILVVPLIIEMDREQQLNELDMQQASLLGTPPMGVAAAPQK	78.495	6e-47	KVI07396.1	Mitochondrial outer membrane translocase complex, subunit Tom22, plant [Cynara cardunculus var. scolymus]	62.77	1e-34	sp|Q9FNC9|TOM92_ARATH	Mitochondrial import receptor subunit TOM9-2 OS=Arabidopsis thaliana GN=TOM9-2 PE=1 SV=3	At5g43970	114	2e-34	KOG4111	Translocase of outer mitochondrial membrane complex, subunit TOM22	U	Intracellular trafficking, secretion, and vesicular transport	K17769|1|6e-48|152|ccav:112509986|mitochondrial import receptor subunit TOM22	GO:0045040//protein import into mitochondrial outer membrane;GO:0030150//protein import into mitochondrial matrix		GO:0005742//mitochondrial outer membrane translocase complex;GO:0031307//integral component of mitochondrial outer membrane
2427	PSR84521.1	Blue copper protein [Actinidia chinensis var. chinensis]	37064.6	0.082	1	1	-	0.62	0.634|0.679|0.718|0.584|0.657|0.648|0.544|0.557|0.588	0.059	9	3.425e-07	PSR84521.1	MATNLNKLVLATIVVAALLQGSWAQTTHLVGDALGWTIPPGGPIAYSTWASKNTFTVGDVLVFNFANSSHDVAKVTKAAFDACNSTNPISISTTGPTNITLTTAGEHHFICTFPGHCAAGQKLAINVTAAATSPSPPPSSSVKTYVVGESLGWNVLPNGTEAYKAWAANKTFLIGDTLVFNFVNGSHNVAEVTKAAYSACDTTTTISLTTTSPARITLTTAGEHFFTCTFPSHCTLGQQLAINVTGTTTAPSPPPTTAAPAPSPTATPPPTTATPAPSPTATPPPTTAAPTPSPAATPPPASTPTATPPPSAATPPPSPSPSGNTTPSTPPPSETTTAPPPPNSATSLASAALPVALLSIAVALLH	48.571	9e-105	OWM65929.1	hypothetical protein CDL15_Pgr015354 [Punica granatum]	46.15	1e-27	sp|P00302|STEL_TOXVR	Stellacyanin OS=Toxicodendron vernicifluum PE=1 SV=1	-	-	-	-	-	-	-	K03006|1|5e-16|83.6|thj:104811869|DNA-directed RNA polymerase II subunit RPB1 [EC:2.7.7.6]		GO:0009055//electron transfer activity	-
2429	PSS33737.1	Metalloendoproteinase [Actinidia chinensis var. chinensis]	34780.1	0.16	1	1	-	0.73	0.734|0.706|0.858|0.745|0.722|0.847|0.636|0.590|0.716	0.086	9	3.882e-05	PSS33737.1	MASNLFQFALCIVLFSIVIPLASYANPSNPNAQKPSPFEFIKHLQGCHKGEKVKGLHQLKTYLERFGYLNYQNSQNQTHANDDDFDDLLESAIKTYQLNYHLKITGTLDSQTVSNMVAPRCGVPDIINGTNFMRAGRKMAHHGHNTLHTVSHYNFFPGRPRWPASQTHLTYGFLSGTNSNAISAVERAFNKWAGATHFTFSQTQNVRNANLMIGFHRRNHGDGAPFDGPGGTLAHAFAPTDGRFHYDADESWVVGSVPGRMDMETVALHEIGHLLGLGHSSVPDAIMFASISSGVTKGLHRDDIEGIRNLYNV	65.686	5e-151	GAV74805.1	Peptidase_M10 domain-containing protein/PG_binding_1 domain-containing protein [Cephalotus follicularis]	43.44	6e-87	sp|O04529|2MMP_ARATH	Metalloendoproteinase 2-MMP OS=Arabidopsis thaliana GN=2MMP PE=1 SV=1	At1g70170	265	1e-86	KOG1565	Gelatinase A and related matrix metalloproteases	OW	Posttranslational modification, protein turnover, chaperones;Extracellular structures	K01402|1|4e-143|409|egr:104426223|matrix metalloproteinase-8 (neutrophil collagenase) [EC:3.4.24.34]!K01388|3|1e-138|399|dzi:111292939|matrix metalloproteinase-1 (interstitial collagenase) [EC:3.4.24.7]!K07999|5|8e-116|340|lsv:111889544|matrix metalloproteinase-20 (enamelysin) [EC:3.4.24.-]	-	-	-
2436	PSR92909.1	AT-hook motif nuclear-localized protein [Actinidia chinensis var. chinensis]	37101.7	0.101	1	1	-	0.66	0.577|0.544|0.609|0.554|0.572|0.575|0.831|0.783|0.876	0.132	9	0.0001308	PSR92909.1	MEPNESALSSYYPHQRHQPQPQPPYQPSPTTTAAVFAASPTNGILSNTERAPQVLYPHSVPSAVETVRRKRGRPRKYGTPEQAAAAKRMSSASAGATIPKKKKQQLGDGGVSSSSKKNQLDALGNAVRGFTPHIISVDAGEDVYQKIMFLMQQSKREICVLSASGSIYNPSLRQPATSGGNITYEGQFDILLLSGSYIRTALGGRTGGLSVCLSSTDGQIIGGGIGGPLKAAGPVQVIVGTFLPDAIKNVIVGATGDASLSKLPSSVGGASVSGVDFRSGVDSSARIPVRGSEDPHSGSQFMIQPRGVQVTTSGATDWIGADARSNSSYELAGRAGHGAHESSENGAYEQLQDYD	61.749	1e-121	XP_002270792.1	PREDICTED: AT-hook motif nuclear-localized protein 14 [Vitis vinifera]	47.59	3e-84	sp|A1L4X7|AHL14_ARATH	AT-hook motif nuclear-localized protein 14 OS=Arabidopsis thaliana GN=AHL14 PE=1 SV=1	-	-	-	-	-	-	-	K23047|1|2e-55|199|bna:106447564|E3 ubiquitin-protein ligase UNKL [EC:2.3.2.27]		GO:0003677//DNA binding	-
2451	PSS04172.1	Glutamate--cysteine ligase [Actinidia chinensis var. chinensis]	58050.4	0.031	1	1	-	0.75	0.893|0.863|0.913|0.814|0.789|0.811|0.582|0.541|0.572	0.147	9	0.00244	PSS04172.1	MALLFQVGPSHCIRSDKMEASKTKDKCISFPSLPSNSTKTRSDSAGVWYKRGHRSVIHASPPTEDAVIATEPLTKEDLVGYLASGCKPKEKWRIGTEHEKFGFEIKTLWPMKYEQIAELLNGIAERFDWDKIMEGDNIIGLKQCIIFEQGKQSISLEPGGQFELSGAPLETLHQTCAEVNSHLYQVKAVAEEMGIGFLGMGFQPKWAGKDIPIMPKGRYEIMRNYMPKVGSLGLDTMFRTCTVQVNLDFSSEADMIRKFRAGLALQPIATALFANSPFTEGKPNGYLTMIGLIRITTVLACSPFVFDDSFGFEQYVDYALDVPMYFVYRAKKYIDCTGMSFRDFMSGKLPPLPGELPTLNDWENHLTTIFPEVRLKRYLEMRGADGGPWRRLCALPAFW…	79.924	0	OMO58643.1	Glutamate--cysteine ligase, GCS2 [Corchorus olitorius]	79.17	0	sp|Q1W2L8|GSH1_TOBAC	Glutamate--cysteine ligase, chloroplastic OS=Nicotiana tabacum GN=GSH1 PE=2 SV=2	-	-	-	-	-	-	-	K01919|1|0.0|855|pper:18777525|glutamate--cysteine ligase [EC:6.3.2.2]	GO:0006750//glutathione biosynthetic process	GO:0004357//glutamate-cysteine ligase activity	-
2462	PSS18958.1	Arginine--tRNA ligase [Actinidia chinensis var. chinensis]	23559.5	0.175	3	7	PSS00208.1	0.82	1.014|0.829|0.660|0.861|0.779|0.605|1.146|0.851|0.674	0.174	9	0.0149	PSS18958.1	MSVAAQAMMLSANSATAASSPTTLFFSNRSPNHYPNHRLNHFRIRASSDDSDCNAEECAPDKEVGKVSMEWLAVEKTKVVGTFPPRKRGWTGYVEKDTAGQTNIYSVEPAVYVAESAISSGTAGSSADGSENTLAVAAGLALISIASASAILLQVGKNPPQVQTAEYSGPSLTYYINKFQPPPEPEVIQASVHPETETAVSVQPESNAPEVQLDASASSSNLS	70.892	1e-96	OMP09294.1	hypothetical protein COLO4_05616 [Corchorus olitorius]	-	-	-	-	-	-	-	-	-	-	-	-	GO:0061635//regulation of protein complex stability;GO:0009735//response to cytokinin		GO:0009535//chloroplast thylakoid membrane
2465	PSR86278.1	LEC14B protein [Actinidia chinensis var. chinensis]	55878.4	0.024	1	1	-	0.71	0.821|0.662|1.047|0.668|0.597|0.846|0.578|0.449|0.709	0.176	9	0.001948	PSR86278.1	MYFLAGEAAFNNMGYSMSRLDINSDLLCGSGTSTSEADDSSHRPNKPLNYLDHEIAQLTKLKSEPHDHLSRILPGKRELPVSTVKMLAGREGNYSGRGRFSTADCCHVLSRYLPVNGPYFVDQKTTRAYVSQFSADGSLFVAGFQGSNIIIYNVDKGWKVQKNIGAKSLRWTITDTSLSPDQRYLVYASMSPILHIVNVGSAATESFANITEIHDGLDLSTEEDGAYSFGIFSVKYSTDGRELVAGSNDNSIYIYDLEANKLSLRILAHTSDVNSVCFADESGHLIYSGSDDNLCKVWDRRFLKAKGKPAGVLMGHLEGITFLDSRGDARYFISNSKDQSIKLWDIRRMSSNATSNPGFRNYEWDYRWMEYPPQARGLKHPCDQSLATYKGHSVLRTLI…	79.588	0	XP_002271734.1	PREDICTED: LEC14B protein isoform X1 [Vitis vinifera]	70.82	0	sp|Q40153|LE14B_LITER	LEC14B protein OS=Lithospermum erythrorhizon PE=2 SV=1	At4g03020	719	0	KOG0266	WD40 repeat-containing protein	R	General function prediction only	K11801|1|0.0|810|vvi:100244218|WD repeat-containing protein 23	-	-	-
2474	PSS03056.1	Alpha crystallin/Hsp20 domain protein [Actinidia chinensis var. chinensis]	17567.1	0.235	2	4	-	0.46	0.345|0.756|0.181|0.448|0.961|0.228|0.351|0.706|0.168	0.283	9	0.002046	PSS03056.1	MSLIPSFFGSRRTNVFDPISLDIWDPFDGFFAIPSSSRETSQFANAKIDWKETPEAHVFKVDLPGLKKEEVKVEMEEGRILQISGERCKEQEEKNDKWHRVERSSGKFLRRFRLPENAKVDQVKAGMENGVLTVTVLKEEVKKPEVKAIDISG	82.39	5e-90	AKT44363.1	heat shock protein 1 [Tectona grandis]	74.68	6e-82	sp|P27880|HSP12_MEDSA	18.2 kDa class I heat shock protein OS=Medicago sativa GN=HSP18.2 PE=2 SV=1	At1g53540	230	2e-78	KOG0710	Molecular chaperone (small heat-shock protein Hsp26/Hsp42)	O	Posttranslational modification, protein turnover, chaperones	K13993|1|3e-88|258|tcc:18590707|HSP20 family protein	-	-	-
2480	PSS01597.1	Porphobilinogen deaminase [Actinidia chinensis var. chinensis]	21359	0.087	2	4	-	0.76	0.906|0.867|0.727|0.790|0.726|0.623|0.800|0.751|0.668	0.09	9	0.0001093	PSS01597.1	MASATVTQILHQTCANSNTQFPYSPPIFPCSQLVFFTIKYSNFPKLQRFSGHRNPASAARAVPENGGVLPADEDEDGVSLGTMKLPLETDLLRFESLLFQWANSLCQGANLPLPVPLKVDKVPGGARLGFITIGDGGETEALVYIDCLVFPATEGSGPIFRAIRNGPKKDQPPPGEPRIMRSLLLAIQKSADIARV	68.02	1e-80	XP_010093760.1	hypothetical protein L484_019163 [Morus notabilis]	-	-	-	-	-	-	-	-	-	-	-	-	-	-	-
2489	PSR87579.1	Carbonic anhydrase [Actinidia chinensis var. chinensis]	31299.9	0.459	5	14	-	0.83	0.924|1.004|0.610|0.953|0.994|0.598|0.912|0.912|0.555	0.185	9	0.03099	PSR87579.1	MLKMATHPLHGCVISIPTMLKSHGILQRRDMATDSYEEAIAGLSKLLSVKGELAPVAAAKVGQITADLQIESFDPIEKIKTGFSHFKREKYEKNPALYSELSKGQSPKFMVFACSDSRVCPSHILGFQPGDAFMVRNIANMVPAYDKIRYSGVGAAIEYAVLHLKVETIVVIGHSCCGGIKGLMSFPDDGPTSTDFIEDWVKICLPAKSKVKAECGDTPFPEQCTTCEKEAVNVSLGNLLTYPFVREGLVKKTLSLKGGYYDFVSGSFELWGLQFGLSPALSV	82.625	2e-156	ABI14813.1	chloroplast carbonic anhydrase [Pachysandra terminalis]	78.46	5e-149	sp|P27141|CAHC_TOBAC	Carbonic anhydrase, chloroplastic OS=Nicotiana tabacum PE=2 SV=1	At5g14740	398	4e-140	KOG1578	Predicted carbonic anhydrase involved in protection against oxidative damage	P	Inorganic ion transport and metabolism	K01673|1|7e-152|431|jre:108997114|carbonic anhydrase [EC:4.2.1.1]	GO:0015976//carbon utilization	GO:0004089//carbonate dehydratase activity;GO:0008270//zinc ion binding	-
2495	PSS19834.1	T-complex protein 1 subunit beta like, partial [Actinidia chinensis var. chinensis]	57077.9	0.393	2	2	-	0.73	0.688|0.766|0.808|0.809|0.898|0.929|0.543|0.553|0.597	0.145	9	0.001254	PSS19834.1	VERLFKDEATEEKGERARMASFIGAIAIADLVKTTLGPKGMDKILQSTGRGRSVTVTNDGATILKSLHIDNPAAKVLVDISKVQDDEVGDGTTSVVVLAGELLREAEKLVATKIHPMTIIAGYRMAAECARNALLQRVMDNKEDAEKFKADLMKIAMTTLSSKILSQDKEHFAKLAVDAVMRLKGSTNLESIQIIKKPGGSLRDSFLDEGFILDKKIGIGQPKRIENAKILVANTAMDTDKVKIYGARVRVDSMSRVAEIETAEKEKMREKVQKIIAHGINCFVNRQLIYNFPEELFADAGILAIEHADFDGIERLALVTGGEIASTFDNPESVKLGHCKLIEEIMIGEDKLIHFSGVAMGQACTIVLRGASNHVLDEAERSLHDALCVLSQTVNDSRV…	95.019	0	XP_002285912.1	PREDICTED: T-complex protein 1 subunit beta [Vitis vinifera]	88.89	0	sp|Q940P8|TCPB_ARATH	T-complex protein 1 subunit beta OS=Arabidopsis thaliana GN=CCT2 PE=1 SV=1	At5g20890	936	0	KOG0363	Chaperonin complex component, TCP-1 beta subunit (CCT2)	O	Posttranslational modification, protein turnover, chaperones	K09494|1|0.0|1003|vvi:100257518|T-complex protein 1 subunit beta	GO:0006457//protein folding	GO:0051082//unfolded protein binding;GO:0005524//ATP binding	GO:0005737//cytoplasm
2505	PSR92700.1	Sugar transport protein [Actinidia chinensis var. chinensis]	58630	0.032	2	3	-	0.79	0.750|0.823|0.733|0.878|0.955|0.836|0.696|0.740|0.657	0.095	9	0.0002451	PSR92700.1	MAGGGFAAPAGGGTHFEAKITPIVIISCIMAATGGLMFGYDVGVSGGVTSMDHFLKKFFPTVYWRTQEGELDSNYCKYDNQGLQLFTSSLYLAGLTSTFFASYTTRRLGRKLTMLIAGVFFIFGVILNASAVNIEMLIIGRILLGCGVGFANQAVPLFLSEIAPTRIRGGLNILFQLNVTIGILFANLVNYGTAKIKGGWGWRLSLGLAGIPAVLLTVGSLLVVDTPNSLIERGRLEEGKEVLRKIRGTDKIEPEFLELVEASRVAKQVKHPFRNLLKRRNRPQLVIAMALQIFQQFTGINAIMFYAPVLFNTLGFKDDASLYSAVITGAVNVISTVVSIYSVDKLGRRFLLLEAGVQMFFSQLVIAIVLGIKVKDHSTNLHNSYAILVVIMVCTFVSA…	83.932	0	XP_021636878.1	sugar transport protein 13-like [Hevea brasiliensis]	81.44	0	sp|Q94AZ2|STP13_ARATH	Sugar transport protein 13 OS=Arabidopsis thaliana GN=STP13 PE=1 SV=2	At5g26340	882	0	KOG0254	Predicted transporter (major facilitator superfamily)	R	General function prediction only	K08150|1|6e-61|212|sot:102593131|MFS transporter, SP family, solute carrier family 2 (myo-inositol transporter), member 13	GO:0008643//carbohydrate transport	GO:0032440//2-alkenal reductase [NAD(P)] activity	GO:0016021//integral component of membrane
2525	PSS33335.1	Aquaporin PIP1-4 like [Actinidia chinensis var. chinensis]	30636	0.182	2	2	-	0.79	0.752|0.939|0.898|0.762|0.948|0.888|0.572|0.684|0.656	0.136	9	0.0029	PSS33335.1	MEGKEEDVRLGANKFAERQPIGTAAQGGDKDYTEPPPAPLFEPGELTSWSFYRAGIAEFMATFLFLYITVLTVMGVVQSPTKCSTVGIQGIAWAFGGMIFALVYCTAGISGGHINPAVTFGLLLARKLSVTRAVFYMVMQCLGAIAGAAVVKGFEKTRYETLGGGANVIAHGYTKGDGLGAEIVGTFVLVYTVFSATDAKRSARDSHVPILAPLPIGFAVFLVHLATIPITGTGINPARSLGAAIIYNKEHAWNDHWIFWVGPFIGAALAALYHQVVIRAIPFKSK	93.031	0	AGG39695.1	aquaporin protein AQU17 [Camellia sinensis]	88.81	0	sp|Q39196|PIP14_ARATH	Probable aquaporin PIP1-4 OS=Arabidopsis thaliana GN=PIP1.4 PE=1 SV=1	At4g00430	522	0	KOG0223	Aquaporin (major intrinsic protein family)	G	Carbohydrate transport and metabolism	K09872|1|0.0|538|sind:105167068|aquaporin PIP		GO:0005215//transporter activity	GO:0016021//integral component of membrane
2550	PSS19130.1	Annexin-like protein [Actinidia chinensis var. chinensis]	35812.6	0.191	5	7	-	0.8	0.838|0.722|0.870|0.820|0.722|0.835|0.827|0.687|0.836	0.066	9	3.739e-05	PSS19130.1	MASLIAPENPSPVADAEAIRKAVQGWGTDEKAIISIMGHRNAVQRKLIRQAYEETYQEDLIKRLESELSGHFEKAVFRWVLDPADRDAVLANVAMKQSKVDYHVIVELSCIYSPEELLAVKRAYQARFKRSMEEDLASHTSGDLGKFLVALVGIYRYDGDEIDPRLAKSEANVLHNAIKEKIFNHEEVIRIVSTRSKAQLMATYNRYKDEYDTTITKHLVDDPADQYLAAVRTAIRCVNDPKKYYEKVIRNALNKPGTDEDALTRVIVTRAEKDLKEIKELYYKRNSVSLDHAVAKETSGDYEAFLLTLLGKED	73.248	3e-173	XP_017984838.1	PREDICTED: annexin-like protein RJ4 isoform X2 [Theobroma cacao]	69.43	4e-164	sp|P51074|ANX4_FRAAN	Annexin-like protein RJ4 OS=Fragaria ananassa PE=2 SV=2	At5g10230	337	1e-115	KOG0819	Annexin	U	Intracellular trafficking, secretion, and vesicular transport	K17098|1|4e-173|485|sind:105169643|annexin D		GO:0005544//calcium-dependent phospholipid binding;GO:0005509//calcium ion binding	-
2553	PSR86186.1	Ran-binding protein 1 a like [Actinidia chinensis var. chinensis]	24717.2	0.05	1	1	-	0.72	0.616|0.721|0.669|0.701|0.825|0.748|0.688|0.787|0.729	0.062	9	3.112e-06	PSR86186.1	MASTDPEHRDGEEPAAGEDEDTGAQVAPIVKLEEVAVTTGEEDEDAILDLKSKLYRFDKDGNQWKERGAGTVKLLKHKETGKVRLVMRQSKTLKICANHLVLPTMSVQEHAGNDKSCVWHATDFADGELKDELFCIRFGSVDNCKTFMEMFQEVAESQLKKEENEDASTAAGLLEKLNVEDKKTEDKASEQVPVAAVKEKKSESEPGKVDTEKKGEEPAPST	82.589	1e-128	XP_002313984.1	RAN BINDING protein 1 [Populus trichocarpa]	71.95	5e-103	sp|Q8RWG8|RBP1B_ARATH	Ran-binding protein 1 homolog b OS=Arabidopsis thaliana GN=RANBP1B PE=1 SV=2	At2g30060	296	1e-102	KOG0864	Ran-binding protein RANBP1 and related RanBD domain proteins	U	Intracellular trafficking, secretion, and vesicular transport	K15306|1|2e-129|367|pop:7454853|Ran-binding protein 1	GO:0043547//positive regulation of GTPase activity;GO:0046907//intracellular transport;GO:0006606//protein import into nucleus;GO:0000082//G1/S transition of mitotic cell cycle;GO:0007051//spindle organization;GO:0006511//ubiquitin-dependent protein catabolic process;GO:0006405//RNA export from nucleus	GO:0008536//Ran GTPase binding	GO:0005737//cytoplasm;GO:0005634//nucleus;GO:0005622//intracellular
2603	PSR94894.1	Photosystem II reaction center PSB28 protein [Actinidia chinensis var. chinensis]	20351.1	0.061	1	2	-	0.81	0.962|0.786|0.832|0.801|0.710|0.699|0.908|0.761|0.804	0.086	9	0.0002282	PSR94894.1	MAALQSLPFSSPASHCPRRTRFFLGMAAGAVHQSRQSSFCGQPLHVRHSSCVTRRSSRIPTLSIMMVKPTIQFIQGTDEQTIPDVKLTKSRDGTNGMAIFSFDQPSVFDSSSEVGDITGFYMIDEEGVLQSVDVSAKFINGKPSRIEAKYVMRTPREWDRFMRFMERYSNQNGLQFVKK	75	3e-92	XP_002271666.1	PREDICTED: photosystem II reaction center PSB28 protein, chloroplastic [Vitis vinifera]	66.11	3e-79	sp|Q0JG75|PSB28_ORYSJ	Photosystem II reaction center PSB28 protein, chloroplastic OS=Oryza sativa subsp. japonica GN=PSB28 PE=2 SV=2	-	-	-	-	-	-	-	K08903|1|6e-93|271|vvi:100260011|photosystem II 13kDa protein	GO:0015979//photosynthesis		GO:0009654//photosystem II oxygen evolving complex
2678	PSR92819.1	Phosphoglycolate phosphatase [Actinidia chinensis var. chinensis]	42210.4	0.415	11	28	-	0.82	0.940|0.817|0.810|0.872|0.763|0.729|0.907|0.734|0.764	0.076	9	0.0001427	PSR92819.1	MLSRGGAVVTVSASSAVSATLFNPKNPNQFKCLFKHNSDKKKSNCYNKSFISSPVYGSVKKAFVRSSSSARRMEAPSRFVVRASAQPLKNADQLIDSVETFIFDCDGVIWKGDKLIDGVPETLDMLRSKGKRLVFVTNNSTKSRKQYGKKFETLGLNVSEEEIFASSFAAAAYLKSIDFPKDKKVYVIGEDGILKELELAGFQYLGGPEDGSKKIELKPGFLMEHDHDVGAVVVGFDRYFNYYKIQYGTLCIRENPGCLFIATNRDAVTHLTDAQEWAGGGSMVGALCGSTQREPLVVGKPSTFMMDYLANKFGILKSQICMVGDRLDTDILFGQNGGCKTLLVLSGVTSLSMLQNPNNSIQPDFYTNKISDFLSLKAATV	79.188	0	XP_017977430.1	PREDICTED: phosphoglycolate phosphatase 1B, chloroplastic [Theobroma cacao]	90.03	0	sp|P0DKC4|PGP1B_ARATH	Phosphoglycolate phosphatase 1B, chloroplastic OS=Arabidopsis thaliana GN=PGLP1B PE=1 SV=1	At5g36790	559	0	KOG2882	p-Nitrophenyl phosphatase	P	Inorganic ion transport and metabolism	K19269|1|0.0|600|tcc:18598468|phosphoglycolate phosphatase [EC:3.1.3.18 3.1.3.48]		GO:0016791//phosphatase activity	-
2679	PSR91856.1	Homeobox protein knotted-1-like [Actinidia chinensis var. chinensis]	49493.5	0.077	3	3	PSS17746.1	0.75	0.825|0.612|0.693|0.852|0.639|0.696|0.958|0.691|0.779	0.112	9	0.0002857	PSR91856.1	MAFPNHPSQEMSLQHFSDQHLGENTSVLRTILPQQLGQPSPEVTGKAPENHHRSPPRQVGVGPTWLNSAILRQQSQYGGNSNFLHLHTNSDSPTSQASNPWLSRSILQRNVSDVRDDVQVSSDSMMAAAISHESADLNHDNRVIGGNRVENNGGVGGELTESDVAGGIGEGVMIWQNARYKSEILSHPFYEQLLSAHVACLRIATPVDQLPRIDAQLAQSQNVVAKYSAPGQGHIGDDKELDQFMTHYVLLLCSFKEQLQQHVRVHAMEAVMACWEIEQSLQSLTGISPGEGTGATMSDEEEDQLDSDTNFFDGSLERNDSMNYGPLVPTESERSLMERVRQELKHELKGGYKEKIVDIREEILRKRRAGKLPGDTTSVLKAWWQSHSKWPYPTEEDKA…	73.932	0	XP_010265705.1	PREDICTED: homeobox protein knotted-1-like 13 isoform X1 [Nelumbo nucifera]	67.9	0	sp|O04136|KNAP3_MALDO	Homeobox protein knotted-1-like 3 OS=Malus domestica PE=2 SV=1	At5g25220	522	0	KOG0773	Transcription factor MEIS1 and related HOX domain proteins	K	Transcription	K16670|1|0.0|530|cmos:111462769|homeobox protein Meis2!K15613|4|2e-154|446|adu:107458758|homeobox protein Meis1	GO:0006355//regulation of transcription, DNA-templated	GO:0003677//DNA binding	GO:0005634//nucleus
2712	PSS29468.1	SH3 domain-containing protein [Actinidia chinensis var. chinensis]	41178.8	0.219	1	1	-	0.79	0.657|0.587|0.848|0.945|0.857|1.229|0.628|0.549|0.793	0.214	9	0.01436	PSS29468.1	MEAIRKQATKLREQVARQQQAVLKQFGSGGYGGSDNVVTDEAELQHHQKLEKLYISTRAAKHFQRDIVRGVEGYIVTGSKQVEIGTKLSEDSRKYGVDNTCTSGNTLSKAALSFGRARAQMEKEHGNLLKSLGTQVAEPLRAMVMGAPLEDARHLAQRYDRARQEAEAQAIEVSKRQAKVREGTGNPDMASKLEAAEVKLQDLKSNMGILGKEAAAAMSAVEAQQQRLTLQRLISMVESERTYHQRVLQILDQLEGEMITERQRIQAPPSPRMESMPPPPSYEEVNGAFTSPTRNGSTDSTSYFLGEVMYSYQAESDVELNLAVGDYVVVRKVSNNGWAEGECKGKAGWFPYGYVERRERVLASKMAEVF	85.135	0	XP_016691585.1	PREDICTED: SH3 domain-containing protein 2-like [Gossypium hirsutum]	76.28	0	sp|Q8VWF1|SH3P2_ARATH	SH3 domain-containing protein 2 OS=Arabidopsis thaliana GN=SH3P2 PE=1 SV=1	Hs4506929	58.9	3e-09	KOG1118	Lysophosphatidic acid acyltransferase endophilin/SH3GL, involved in synaptic vesicle formation	IT	Lipid transport and metabolism;Signal transduction mechanisms	K11247|1|3e-145|419|ppp:112291611|endophilin-A	-	-	-
2719	PSR95656.1	Ubiquitin carboxyl-terminal hydrolase [Actinidia chinensis var. chinensis]	89896.6	0.213	1	1	-	0.62	0.569|0.941|0.622|0.574|0.886|0.645|0.415|0.532|0.351	0.194	9	0.001015	PSR95656.1	MELLRANLSRVRIPEPTNRIYKQECCISFDTPKSEGGLFIDMNTFLAFGKDSVGWNFEKTGNPVYLHIRQTKKAVSEDRPLKKPTLLAIGMEGGFDNNEPEYEETHNIVVLPDYVTLPFPSVELPEKVRLAVDAILMAEGAERKEQVASWTADNKQISAYAMNLQQLDNGIMVPPSGWKCAKCDKTENLWLNLTDGMTLCGRRNWDGSGGNNHAIDHFKETGYPLAVKLGTITADLDAADVFSYPEDESVLDPLLAQHLAFFGIDFSSLQKTEMTTAERELDQNTNFDWNRIQESGQETEPLFGPGYTGLVNLGNSCYLAATMQVMLSTRSFCSRYYVNQSLKKAFVAAPADPTVDLNMQLTKLANGLLSGKYSVPAPEKDDTASVANSTPTVKQEGIP…	82.797	0	CBI20399.3	unnamed protein product, partial [Vitis vinifera]	73.98	0	sp|Q8L6Y1|UBP14_ARATH	Ubiquitin carboxyl-terminal hydrolase 14 OS=Arabidopsis thaliana GN=UBP14 PE=1 SV=1	Hs4507855	762	0	KOG0944	Ubiquitin-specific protease UBP14	O	Posttranslational modification, protein turnover, chaperones	K11836|1|0.0|1410|vvi:100264052|ubiquitin carboxyl-terminal hydrolase 5/13 [EC:3.4.19.12]	GO:0006511//ubiquitin-dependent protein catabolic process;GO:0016579//protein deubiquitination	GO:0004843//thiol-dependent ubiquitin-specific protease activity;GO:0008270//zinc ion binding	-
2723	PSR86418.1	Structural maintenance of chromosomes protein like [Actinidia chinensis var. chinensis]	156748	0.007	1	1	-	0.75	0.476|0.545|0.745|0.810|0.919|1.250|0.546|0.598|0.816	0.242	9	0.01086	PSR86418.1	MPSLHSPGRIHRLELENFKSYKGHQTIGPFFNFTAIIGPNGSGKSNLMDAISFVLGVRTGHLRGSQLRDLIYAFDDREKEQKGRRAFVRLVYQLGNETELQFTRSITSSGGSEYRIDSRVVNWEEYNGKLKSLGILVKARNFLVFQGDVESIASKNPRELTGLLEQISGSDELKGDYEKLEEQKARAEEKSALAYQKKRTIVSERKQKKEQKEEAEKHLRLQDQLKTVKKEHCLWQLWTIGDDIEKANDEIESDKRNRDEFLQEVTDYEHEASIKKKEQAKYLKEIAQCEKKIAEKNSRLDKNQPELVKLKEEESRINSKIKSSEKDLKKRKEEKKKHTAEIKKLQNDLHDLTRQLGELHEKVQDGGEKLQLADSQLETYHRIKEEAGMKTSKLRDEKE…	75.628	0	XP_010652370.1	PREDICTED: structural maintenance of chromosomes protein 1 [Vitis vinifera]	64.85	0	sp|Q6Q1P4|SMC1_ARATH	Structural maintenance of chromosomes protein 1 OS=Arabidopsis thaliana GN=SMC1 PE=2 SV=2	At3g54670	1102	0	KOG0018	Structural maintenance of chromosome protein 1 (sister chromatid cohesion complex Cohesin, subunit SMC1)	D	Cell cycle control, cell division, chromosome partitioning	K06636|1|0.0|1358|vvi:100263447|structural maintenance of chromosome 1	GO:0007064//mitotic sister chromatid cohesion	GO:0046982//protein heterodimerization activity;GO:0003682//chromatin binding;GO:0005524//ATP binding	GO:0005634//nucleus;GO:0008278//cohesin complex
2740	PSS33221.1	Peptide methionine sulfoxide reductase [Actinidia chinensis var. chinensis]	28863.4	0.101	3	8	-	0.77	0.768|0.788|0.712|0.750|0.809|0.719|0.766|0.846|0.753	0.042	9	4.706e-07	PSS33221.1	MFLLRTTAAPLSLLLTPSSSPLSLSKPSLSLSKLPIHPPSFPHPTRRLSPPKMSWLGKLGFGARSTTESSVDPASSAIAQGPDDDVPAPGQMFVQFGAGCFWGVELAFQRVPGVSRTEVGYSQGFLHEPSYSDACSGTTNHSEVVRVQYDPKECSFETLLDVFWARHDPTTLNRQGNDVGTQYRSGIYFYTPEQEKAALESKDRQQEILNRKIVTEILPAKKFYRAEEYHQQYLAKGGRFGFQQSAEKGCNDPIRCYG	81.172	5e-141	XP_011076446.1	peptide methionine sulfoxide reductase A1-like [Sesamum indicum]	73.97	3e-133	sp|Q9SEC2|MSRA_LACSA	Peptide methionine sulfoxide reductase OS=Lactuca sativa PE=2 SV=1	At4g25130	352	3e-123	KOG1635	Peptide methionine sulfoxide reductase	O	Posttranslational modification, protein turnover, chaperones	K07304|1|9e-142|401|sind:105160665|peptide-methionine (S)-S-oxide reductase [EC:1.8.4.11]		GO:0008113//peptide-methionine (S)-S-oxide reductase activity	-
2741	PSS31767.1	Patellin-3 like [Actinidia chinensis var. chinensis]	18418.5	0.265	2	2	-	0.75	0.852|0.868|0.793|0.789|0.807|0.716|0.665|0.651|0.595	0.096	9	0.0001395	PSS31767.1	MISPFLTQRTKSKFVFAGPSRTAEILFKYISPEQVPIQYGGLSVDFCDCNPEFSMDDPATAITVRPATKQTVEIQVNEKCTIVWELRVVGWEVTYSAEYVPNAEGAYTVVIQKPKKMAPTDEPVVANSFKIGELGKIVLAIDNPTSKRKKFVYRFKVKPFCN	75.309	4e-89	XP_017230974.1	PREDICTED: patellin-3-like [Daucus carota subsp. sativus]	70	1e-82	sp|Q56Z59|PATL3_ARATH	Patellin-3 OS=Arabidopsis thaliana GN=PATL3 PE=1 SV=2	At1g72160	251	3e-82	KOG1471	Phosphatidylinositol transfer protein SEC14 and related proteins	I	Lipid transport and metabolism	K19996|1|2e-91|279|oeu:111372260|phosphatidylinositol transfer protein SFH5		GO:0005215//transporter activity	GO:0016021//integral component of membrane;GO:0005622//intracellular
2764	PSS20924.1	Nuclear pore complex protein [Actinidia chinensis var. chinensis]	214635	0.005	1	1	-	0.83	0.723|0.633|0.725|0.894|0.788|0.877|1.007|0.865|0.991	0.126	9	0.005832	PSS20924.1	MVSPKQLLSTIESSLLGPTPPSPSQRIELMLAIRRSLSSLQSPLSYPSPKPSDRAQVQSREVRLPDSSPISLDDQDVQIALKLSDDLHLNELDCVRLIVSANQEWGLLGREPLEILRLTAGLWYTERRDLITALYTLLRAVVLDQGLEADLVSDIQKYLEDLINAGLRQRLISLIKELNREEPSGLGGPNSQHHVLDSRGALVERRAVVCRERLILGHCLVLSILIVRASPKDVKDIFSALKDSAAEHNGSNDTLKHQITYSLLFSLVIALISDALSAAPDKVSVLSRDSSFRHEFQETVIASGSDTIVEGFLDCVRLAWAVHLMLVLDGIDARETVPSASSSDMQYIFSCLEIIFSNNVFQFFLLKILQTAAYQNDDEDMIYMYDAYLHKLITCFLSH…	80.614	0	XP_010656422.1	PREDICTED: nuclear pore complex protein NUP205 isoform X1 [Vitis vinifera]	66.53	0	sp|F4KBW6|NU205_ARATH	Nuclear pore complex protein NUP205 OS=Arabidopsis thaliana GN=NUP205 PE=1 SV=1	At5g51200	2424	0	KOG1835	Uncharacterized conserved protein	S	Function unknown	K14310|1|0.0|3132|vvi:100266475|nuclear pore complex protein Nup205	GO:0006999//nuclear pore organization	GO:0017056//structural constituent of nuclear pore	GO:0005643//nuclear pore;GO:0044611//nuclear pore inner ring
2766	PSS14342.1	TBC1 domain family member 2B like [Actinidia chinensis var. chinensis]	44735.4	0.021	1	1	PSS05959.1;PSS16106.1	0.83	0.855|0.796|0.802|0.924|0.858|0.843|0.840|0.758|0.763	0.052	9	1.644e-05	PSS14342.1	MYGTQSRRDLALEFQAHMPILRPSIHARRANLTVKFQDLYGFTVEGNVDDVNVLNEVREKVRQQGRVWWALEANKGANWYLQTIVSSTLKSSLKFSALANAITLKRLIRKGIPPVLRPKVWFSLSGAAKKKSTVPESYYNDLTIAVEGRVTPATRQIDHDLPRTFPGHPWLDTPEGHATLRRVLVGYSFRDSDVGYCQGLNYVAALLLLVMKTEEDAFWMLAVLLENVLVNDCYTTNLSGCHVEQRVFKDFLLKKCPRIAAHLEDLEFDVSLVATEWFLCLFSKSLPSETTLRVWDVLFYEGAKVLFHVALAIFKMKEEELLMSHQVGDVINTLQKTTHHLFDPDELLTVAFDKIGSMTTTTISKQRKKQEPAVMAELDQRLRRLNSLNE	91.795	0	XP_010046069.1	PREDICTED: TBC1 domain family member 2A [Eucalyptus grandis]	-	-	-	-	At3g07890	705	0	KOG2058	Ypt/Rab GTPase activating protein	U	Intracellular trafficking, secretion, and vesicular transport	K20165|1|0.0|747|egr:104434918|TBC1 domain family member 2A	-	-	-
2778	PSS00310.1	Pentatricopeptide repeat-containing protein [Actinidia chinensis var. chinensis]	65846.4	0.117	1	1	-	0.81	0.875|0.840|0.828|0.870|0.839|0.807|0.776|0.729|0.717	0.057	9	2.029e-05	PSS00310.1	MTLYRLILQTLRRRSSLSSTTAAAAVSATHTRSPDYHIDQNLNYLIQNRSYAFSSAEEAAAERRRRKRRLRIEPPLHALRRDPNAPRPPPDPNAPRLPDSTSALVGPRLNLHNRVQSLIRAGDLHHASAVARHSVFSNTRPTVFTCNAIIAAMYRNKRFDDAVALFHFFYNQSNIIPNVVSYNVLINTHCDCGRVDVALDVYKHILANAPFSPSHVTYRHLTKGLIDAGRIGEAVDLLREMLNKGHGADSLVYNNLISGFLNLENLNKANELFDELKERCLVYDGVVNATFMDWFFNQGRDKEAMESYKSLLDRQFKMVPATCNVLLEVLLKHGRKTEALALFDNMLDTHTPPTFQGVNSDTFNIMVNDCFKLGKISEAFDVFKKAGKKAGSKPFAMDV…	75.315	0	XP_018817898.1	PREDICTED: pentatricopeptide repeat-containing protein At1g10270 [Juglans regia]	63.09	0	sp|Q9SY69|PPR29_ARATH	Pentatricopeptide repeat-containing protein At1g10270 OS=Arabidopsis thaliana GN=GRP23 PE=1 SV=1	At1g10270	670	0	KOG4197	FOG: PPR repeat	R	General function prediction only	K17710|1|4e-43|166|psom:113283793|pentatricopeptide repeat domain-containing protein 1	-	-	-
2855	PSS29935.1	Ferredoxin--NADP reductase, leaf-type isozyme like [Actinidia chinensis var. chinensis]	40830.8	0.534	1	4	-	0.7	0.944|0.843|0.754|0.826|0.737|0.596|0.615|0.528|0.459	0.16	9	0.001366	PSS29935.1	MAAAVSAAVSLPSSKSTSLSTRTSIFSPERINFNKVSLPYRNVSGGGKMVSIIRAQVTTEAPAKVEKISKKMEEGVVVNKYRPKDPYIGRCLLNTKITGDDAPGETWHMVFSTEGEVPYREGQSIGVIADGIDKNGKPHKLRLYSIASSALGDFGDSKTVSLCVKRLVYTNDKGELVKGVCSNFLCDLKPGAEVKVTGPVGKEMLMPKDPNATVIMLATGTGIAPFRSFLWKMFFEKYDDYKFNGLAWLFLGVPTSSSLLYKEEFEKMKEKAPENFRLDFAVSREQTNEKGEKMYIQTRMAQYAEELWELLKKDNTYVYMCGLKGMEKGIDDIMLSLAAKDGINWLDYKKQLKKAEQWNVEVY	91.46	0	NP_001311702.1	ferredoxin--NADP reductase, leaf-type isozyme, chloroplastic [Capsicum annuum]	89.26	0	sp|O04977|FENR1_TOBAC	Ferredoxin--NADP reductase, leaf-type isozyme, chloroplastic OS=Nicotiana tabacum GN=PETH PE=2 SV=1	At1g20020	598	0	KOG1158	NADP/FAD dependent oxidoreductase	C	Energy production and conversion	K02641|1|0.0|669|cann:107859876|ferredoxin--NADP+ reductase [EC:1.18.1.2]		GO:0004324//ferredoxin-NADP+ reductase activity;GO:0000166//nucleotide binding	-
2887	PSS20773.1	Auxin-binding protein [Actinidia chinensis var. chinensis]	22069.5	0.191	2	7	-	0.81	0.843|0.772|0.832|0.813|0.737|0.851|0.843|0.753|0.808	0.042	9	1.804e-06	PSS20773.1	MFLPILFIFSLLPFSHSAVQDFCVGDLALPDTPAGYPCKKPAKVTVNDFVYSALGVAGNTSNLIKAAVTPAFVTQFPGLNGLGLSLARLDLAVDGVVPMHTHPGASEVLFVLEGTICAGFISSTDNVVYFQALNKGDIMIFPQGLLHFQINSGEGVAIAIVSFSSPSPGLQITDFALFGNNLPTELVVKTTFLDEAQVKKLKGVLGGTG	78.095	3e-116	AEN02469.1	germin-like protein [Camellia sinensis]	72.73	3e-106	sp|O04011|ABP20_PRUPE	Auxin-binding protein ABP20 OS=Prunus persica GN=ABP20 PE=2 SV=1	-	-	-	-	-	-	-	-		GO:0030145//manganese ion binding;GO:0045735//nutrient reservoir activity	GO:0005618//cell wall;GO:0005576//extracellular region
2933	PSS18979.1	Aspartic proteinase [Actinidia chinensis var. chinensis]	55808.8	0.228	3	7	-	0.79	0.844|0.906|0.678|0.982|1.009|0.689|0.723|0.759|0.562	0.15	9	0.004998	PSS18979.1	MKHGYLFCAFSLLVLTCSLVAASSDGLVRIGLKKRPLDLHGIKAARMSRMKGEYGKGVNGVHDKKSEGDIIALKNYMDAQYYGEIGVGSPQQKFTVVFDTGSSNLWVPSSKCIFSIACLFHSKYKHAKSNTYQKNGKTIAIQYGSGAVSGFLSQDNIRVGDLLVKDQLFMEATKEGSLTFVAAQFDGILGLGFQEISVGNVVPVWYNMVEQALVKERVFSFWLNRDAASTEGGELVLGGVDSKHFKGEHTKVSVTQKGYWQFMMDDFLIGNYSTGFCKEGCAAIVDSGTSLLAGPTAVVTQINHAIGAEGVVSMECKEIVSEYGEQIWDLLVAGVQADKICSQIGLCALVRDQSVSSNIKQVVEEENKEQVGLGDDLFCAACQMLVVWVQNQLKQKNTK…	69.822	0	XP_018816494.1	PREDICTED: aspartic proteinase-like isoform X1 [Juglans regia]	63.73	0	sp|Q42456|ASPR1_ORYSJ	Aspartic proteinase oryzasin-1 OS=Oryza sativa subsp. japonica GN=Os05g0567100 PE=2 SV=2	At1g11910	638	0	KOG1339	Aspartyl protease	O	Posttranslational modification, protein turnover, chaperones	K08245|1|0.0|748|pop:7479135|phytepsin [EC:3.4.23.40]	GO:0006508//proteolysis;GO:0006629//lipid metabolic process;GO:0030163//protein catabolic process	GO:0004190//aspartic-type endopeptidase activity	-
2938	PSR98022.1	L-aminoadipate-semialdehyde dehydrogenase-phosphopantetheinyl transferase [Actinidia chinensis var. chinensis]	29582.8	0.027	1	1	-	0.8	1.165|0.858|1.060|0.949|0.704|0.841|0.613|0.435|0.536	0.244	9	0.03605	PSR98022.1	MEIGKGVQRWVVDISQWDPSPHEFSHAMSFLPQHEHSSITRYVKLEDRKRALVSKLLQYALVHEVLGIPFDEIVIKRTVEGKPYLDGYKEDSELPNFNFNASHHGDYVAIASEPICIVGLDIVSHSIPEKETIPEFIQNFSSYFSRLEWDNIVNAGSCDDLLNEFYRYWCLKEAFVKAIGTGVGYRLDSVEFHHTRGTNIFVKVDGKVLKEWRFWLYDLGKRHTRTVEQLIPVSCKGGEIPTEQENDACQAEEIA	72.103	2e-125	XP_009631118.1	PREDICTED: L-aminoadipate-semialdehyde dehydrogenase-phosphopantetheinyl transferase-like isoform X1 [Nicotiana tomentosiformis]	-	-	-	-	Hs20357568	140	7e-40	KOG0945	Alpha-aminoadipic semialdehyde dehydrogenase-phosphopantetheinyl transferase	EH	Amino acid transport and metabolism;Coenzyme transport and metabolism	K06133|1|3e-126|363|nto:104120944|4'-phosphopantetheinyl transferase [EC:2.7.8.-]		GO:0008897//holo-[acyl-carrier-protein] synthase activity;GO:0000287//magnesium ion binding	-
2947	PSS34658.1	Chlorophyll a-b binding protein [Actinidia chinensis var. chinensis]	37704.5	0.226	2	31	-	0.75	1.118|0.822|0.751|0.863|0.687|0.581|0.809|0.589|0.555	0.178	9	0.003606	PSS34658.1	MDTLPNPTATTSPPQIIPYAPHLPHPHLTYNPNPNLTSHNTQSNPNLPNPSHRLRTLAMAAATSAATSSFIGTRLTGVRASSGPIQVQARFGFGKKKAAPKKAKSRPGTDRPLWYPGAKAPEYLDGSLVGDYGFDPFGLGKPAEYLQFDLDSLDQNLAKNQAGDVIGTRFETSEVKSTPFQPYSEVFGLQRFRECELIHGRWAMLATLGAITVEWLTGVTWQDAGKVELIEGSSYLGQPLPFSITTLIWIEVLVIGYIEFQRNAELDEEKRLYPGGKFFDPLGLASDPEKKATLQLAEIKHARLAMVGFLGFAVQAAVTGKGPLNNWVTHLSDPLHTTIIDNVLS	87.189	2e-178	XP_015950276.1	chlorophyll a-b binding protein CP29.2, chloroplastic [Arachis duranensis]	85.09	2e-170	sp|Q9XF88|CB4B_ARATH	Chlorophyll a-b binding protein CP29.2, chloroplastic OS=Arabidopsis thaliana GN=LHCB4.2 PE=1 SV=1	-	-	-	-	-	-	-	K08915|1|0.0|506|cmos:111438232|light-harvesting complex II chlorophyll a/b binding protein 4	GO:0018298//protein-chromophore linkage;GO:0009765//photosynthesis, light harvesting	GO:0016168//chlorophyll binding	GO:0009535//chloroplast thylakoid membrane;GO:0009522//photosystem I;GO:0009523//photosystem II;GO:0016021//integral component of membrane
2981	PSS19841.1	Thioredoxin-like protein [Actinidia chinensis var. chinensis]	34121.4	0.401	1	2	-	0.8	0.999|0.926|0.888|0.844|0.807|0.746|0.700|0.640|0.612	0.132	9	0.00262	PSS19841.1	MATVTNFLPKPPSHLASPTRLNPFNPYYSSYQLPNFFPRPLRAKPQTRPKLFVPKATAASKTKKAASDERVQQVHSVEEFDEALRTARNKLVVVEYAASHSLQSSKIYPFMVDLSRTCSDVEFLLVMGDESEKTRELCRREKIDKVPHFSFYKSMEKIHEEEGIGPDQLVGDVLYYGDNHSAVVQLHCREDVERLIEDHKVDQKLIVLDVGLKHCGPCVKVYPTVIKLSKQMTDTVVFARMNGDENDSCMKFLKDMNVVEVPTFLFIRDGEICGRYVGSGKGELIGEILRYQGVRVT	80.399	1e-174	OMO75465.1	Thioredoxin [Corchorus olitorius]	70.63	2e-147	sp|Q9SGS4|CDSP_ARATH	Thioredoxin-like protein CDSP32, chloroplastic OS=Arabidopsis thaliana GN=CDSP32 PE=1 SV=1	At1g76080	416	4e-147	KOG0907	Thioredoxin	O	Posttranslational modification, protein turnover, chaperones	K03671|1|1e-15|75.9|lsv:111897912|thioredoxin 1!K04733|2|4e-15|80.1|hbr:110664108|interleukin-1 receptor-associated kinase 4 [EC:2.7.11.1]	GO:0045454//cell redox homeostasis;GO:0006662//glycerol ether metabolic process;GO:0034599//cellular response to oxidative stress	GO:0047134//protein-disulfide reductase activity;GO:0016671//oxidoreductase activity, acting on a sulfur group of donors, disulfide as acceptor;GO:0015035//protein disulfide oxidoreductase activity;GO:0004791//thioredoxin-disulfide reductase activity	GO:0005737//cytoplasm;GO:0005623//cell
3005	PSS19134.1	Mediator of RNA polymerase II transcription subunit 15a like [Actinidia chinensis var. chinensis]	14376.9	0.102	1	1	PSS19132.1	0.82	0.727|0.763|1.135|0.700|0.754|1.077|0.626|0.638|0.948	0.188	9	0.016	PSS19134.1	MDDDTNMAGGDKPTMDTGDWRAQLQPDSRQRIVNKIMDTLKRHLPFSGEEGLQELKKIAARFEEKTYTSSTSQPDYLRKISLKMMTMENKSQNTTANSLLSSSANNSENPTDSGAEDVDRRENTKELA	68.908	5e-53	XP_012073096.1	mediator of RNA polymerase II transcription subunit 15a [Jatropha curcas]	61.68	1e-40	sp|F4I171|MD15A_ARATH	Mediator of RNA polymerase II transcription subunit 15a OS=Arabidopsis thaliana GN=MED15A PE=1 SV=1	-	-	-	-	-	-	-	K14972|1|9e-51|173|pper:18775383|PAX-interacting protein 1	GO:0006355//regulation of transcription, DNA-templated	GO:0003712//transcription cofactor activity	-
3007	PSS04303.1	Preprotein like [Actinidia chinensis var. chinensis]	58342	0.078	5	8	-	0.83	1.002|0.889|0.815|0.928|0.810|0.741|0.878|0.749|0.688	0.1	9	0.00151	PSS04303.1	MLITVREVSCSTFNLSSLSRKSSLRPRNSTCRASLSVQRKLANDPPWNLLLSSHSCEGSVFDPLGISEGLNSSSWESFLGMLSQKFESTSGTRKEKPSSSRGVAAAIEDTSIDFGDFFKGPLPGKFLKLLGYLALSRLGIYVPLGGVNREAFVGNLDQNSLLSTLDSFSGGGIGRLGICSLGIVPFINAQIVFQLLAQIYPKLQELQKREGEAGRKKILQYTRYASVGFAIVQAIGQVLFLRPYVNDFSTEWAISSVTLLTLGSVLTTYIGERISDLKLGNGTSLLIFTSIISYLPASFGRTAAQAFQDGNYVGLIAIIVSFSLLVLSIVYVQEAERKIPINYASRYTSRTGGLQKSAYLPFKVNSSGVMPIIFSTSSLALPGTLARFTGVAALKKAAF…	85.028	0	OMO94156.1	SecY/SEC61-alpha family [Corchorus capsularis]	83.56	0	sp|Q38885|SCY1_ARATH	Preprotein translocase subunit SCY1, chloroplastic OS=Arabidopsis thaliana GN=SCY1 PE=1 SV=2	-	-	-	-	-	-	-	K10956|1|0.0|895|nnu:104605333|protein transport protein SEC61 subunit alpha	GO:0015031//protein transport		GO:0016021//integral component of membrane
3048	PSS00268.1	hypothetical protein CEY00_Acc24237 [Actinidia chinensis var. chinensis]	48225.9	0.021	1	2	-	0.78	0.680|0.699|0.938|0.742|0.773|1.002|0.653|0.643|0.866	0.13	9	0.001183	PSS00268.1	MSLPPNFSFSCYGLWLQLLLFVAWFYTSEAVEEIKANPTLNVGNISKVEDAANFHIYYGQAFKVIKNTFDGKSYLLIQNNSRMASRTRYCTGRIKSFVVPLSNYSVDATYFPVSFFEVRTQTIFLILLGLLGNLKGITSDFVASQCVLKLYNEGQIEFINKTEPQQLKQFETHFISNTDQAQYCNFATFLPIGEDFPLQRAEWIKYIGVFSNLEVRANQVYDAVKQNYMCLMKAAASKTTSFKPIVAWLDYNDGVWSFTKESYKLKLVEDAGGENVDNSINRFTYNISVPDDLDEFHAILCTVEVVIDETSTPDPVAYTMSSFLQNINVGDQSCFAFVANKSLWRYDKRIQNNVPLDWYDGAVSQPQLVLADLIEAFFPSGSYTASYFRNLAKEEGVVK…	70.762	0	XP_016489815.1	PREDICTED: uncharacterized protein LOC107809646 isoform X1 [Nicotiana tabacum]	-	-	-	-	-	-	-	-	-	-	-	-	-	-	-
3083	PSS17917.1	IST1-like protein [Actinidia chinensis var. chinensis]	50836	0.018	1	1	-	0.72	0.917|0.922|0.879|0.668|0.672|0.621|0.627|0.606|0.577	0.142	9	0.0006189	PSS17917.1	MFDGLLKSKFYSRCKSAIKITKTRVEMIKRKRSAMQKYLKNDISDLLKNRLDINAYGRAEGLLVELNMSACYEFIEQFCGCISNQLSLMNKQRECPEECKEAISSLIFAAARFADLPELRELRSIFADKYGNSIEAYVNGKFVEKLKAMPPSTDAKLQLLQDIALEFGIQWDSKVLEQKLYNPPASEHARSKNVNNDKYKAHKTRDKPIRKINQQEEEIPSYGRKEVGDDLYKLPDNDDPPGKDIPVASTDKNEQQKKSNKVSEEKAGDKRSFYYRFIPPPYTKPKAAETEAKTNVSVENNRNQNDSAGEAKPQPRSVRRRPLKPPPGHDEGNGIKHEASKQRLKIVNKDDRKGDEEERKMDQLLMHYSAKKSPQQSNVDAGNRPTRNQSKARAMSLPE…	45.155	9e-138	XP_021298595.1	uncharacterized protein LOC110427410 [Herrania umbratica]	-	-	-	-	At1g79910	295	2e-96	KOG2027	Spindle pole body protein	Z	Cytoskeleton	K19476|1|7e-136|403|gab:108450812|vacuolar protein sorting-associated protein IST1	GO:0015031//protein transport	-	-
3095	PSR94995.1	Mitochondrial import receptor subunit TOM40-1, N-terminally processed like [Actinidia chinensis var. chinensis]	34741.4	0.408	1	1	-	0.67	0.731|0.785|0.808|0.714|0.766|0.765|0.464|0.478|0.492	0.145	9	0.0006082	PSR94995.1	MAAIVPPTATSPPASKPTEIPPEKVDYLNLPCPIPYEEIHREALMSLKPELFEGLRFDFTKGLNQKFSLSHSVFMGPTEIPSQSSDTIKIPTAHYEFGANFIDPKLMLFGRVLTDGRVNARMKCDLTENLSLKANAQLTNEPHMSHGMANFDYKGKDYRTQFQLGNGALFGANYIQSVTPHLSLGGEVFWAGQYRKSGIGYAARYNTDKMVATGQVASTGVVALSYVQKVSEKVSLASDFTYNYLSRDVTSSFGYDYILRQCRLRGKIDSNGCTSAFLEERLNMGLNFILSAEIDHQKKDYKFGFGLTVGE	89.423	0	XP_009766087.1	PREDICTED: mitochondrial import receptor subunit TOM40-1-like [Nicotiana sylvestris]	72.99	5e-172	sp|Q9LHE5|TO401_ARATH	Mitochondrial import receptor subunit TOM40-1 OS=Arabidopsis thaliana GN=TOM40-1 PE=1 SV=3	At3g20000	479	9e-172	KOG3296	Translocase of outer mitochondrial membrane complex, subunit TOM40	U	Intracellular trafficking, secretion, and vesicular transport	K11518|1|0.0|595|nsy:104217509|mitochondrial import receptor subunit TOM40	GO:0030150//protein import into mitochondrial matrix;GO:0055085//transmembrane transport	GO:0015266//protein channel activity	GO:0016021//integral component of membrane;GO:0005742//mitochondrial outer membrane translocase complex;GO:0005741//mitochondrial outer membrane
3134	PSR95481.1	Pleiotropic drug resistance protein [Actinidia chinensis var. chinensis]	164389	0.098	2	2	-	0.78	0.910|0.884|0.759|0.937|0.907|0.763|0.678|0.635|0.548	0.139	9	0.002947	PSR95481.1	MAAAYAGDDLARSSGSRRSWRSTSIREMWQGPPDVFQRNSTRRQVVDEEEELKWAAIERLPTYDRLKKGMLQQATSTGRMVRNEVDVTNLGAQDKKQLMESILKVVEDDNEKFLHRLRSRTDRVGIEIPKIEVRFQNLSVEGDAYVGTRALPTLLNSTLNAIEGVLGMVGLSPSKKRVVKILKDVSGIIRPSRMTLLLGPPGAGKTTLLQALSGKSDDNLRVTGKVTYCGHEFKEFVPQRTCAYISQHDLHYGEMTVRETLDFSGRCLGVGTRYDLLSELSRREKEAGIKPDPEIDAFMKATAMAGLETSLITDYVLKILGLDICADIMVGDDMRRGISGGQKKRVTTGEMLVGPAKAFFMDEISTGLDSSTTFQIVKFMRQMVHIMDVTMVISLLQPA…	85.92	0	XP_011088856.1	pleiotropic drug resistance protein 2 [Sesamum indicum]	81.67	0	sp|Q2PCF1|PDR2_NICPL	Pleiotropic drug resistance protein 2 OS=Nicotiana plumbaginifolia GN=PDR2 PE=2 SV=1	At2g36380	2182	0	KOG0065	Pleiotropic drug resistance proteins (PDR1-15), ABC superfamily	Q	Secondary metabolites biosynthesis, transport and catabolism	K05681|1|5e-68|247|cvr:CHLNCDRAFT_140061|ATP-binding cassette, subfamily G (WHITE), member 2	GO:0006810//transport	GO:0042626//ATPase activity, coupled to transmembrane movement of substances;GO:0016887//ATPase activity;GO:0005524//ATP binding	GO:0016021//integral component of membrane;GO:0005886//plasma membrane
3157	PSS26669.1	50S ribosomal protein [Actinidia chinensis var. chinensis]	31126.1	0.053	1	1	-	0.79	0.794|0.911|0.710|0.724|0.829|0.628|0.852|0.943|0.734	0.102	9	0.000549	PSS26669.1	MLRRRLSSLIATSIHNGSSIHFKPSSIVSRLPSPTWPLRSNISPNLNGAFVPAQIQGMRAYSLLSLNELRDYKVGAKKKKTRKGRGIGSGKGKTAGRGHKGQKARGTMKFGFEGGQTPLRRRMPKRGFKNPFSLEFQPVGLGKIAKLINAGKIDSSELITMKTLKDTGAIGKQIRDGVRLMGRGAEEIQWPIHLEVSRVTVRAKEAVEAAGGSVRKVYYNKLGLRALLKPEWFEKKGRLLPRAARPPPKQKDKVDSIGRLPAPTKPIPFTPEEREAMSTVSIS	78.893	2e-152	OVA09142.1	Ribosomal protein L15 [Macleaya cordata]	34.67	5e-14	sp|P25873|RK15_ARATH	50S ribosomal protein L15, chloroplastic OS=Arabidopsis thaliana GN=RPL15 PE=1 SV=2	At5g64670	395	1e-139	KOG0846	Mitochondrial/chloroplast ribosomal protein L15/L10	J	Translation, ribosomal structure and biogenesis	K02876|1|8e-151|427|oeu:111397134|large subunit ribosomal protein L15	GO:0006412//translation	GO:0003735//structural constituent of ribosome	GO:0015934//large ribosomal subunit
3163	PSS24333.1	Subtilisin-like protease SBT4.14 [Actinidia chinensis var. chinensis]	80719	0.034	1	1	-	0.74	0.613|0.997|0.593|0.772|1.243|0.725|0.495|0.772|0.458	0.25	9	0.0117	PSS24333.1	MSRGRYIHSLLFFSHLLVCILTGLVAVYGDTQKKFYIVFLKDQPVHTEFARQSHINLLSILKGSDHDARESLVYSYTRTFNAFASKLYEDEANKLSSMDGVLSVFPNRYHKLHTTRSWEFIGLPHTAKRHLKTEGNIIVGLLDTGITPQSESFADDGFGPPPAKWKGTCGHFANFSGCNNKLIGARYFKLDGIPDPNDILSPIDVDGHGTHTSSTLAGNQVPNANLYGLAQGTARGAVPSARVAMYKVCWVSSGCSDMDLLAAFDAAVHDGVDVISISIGGFTGNYVSDFIAIGSFHAMRNGIITVASAGNDGPRFASVSNHAPWMVTVAASGIDRQFRSKVVLGSGKTISGVGVSIFDPKQNLYPLISGDRVAKSSASMENARYCFEDSIDPQKVKGK…	72.081	0	XP_011023458.1	PREDICTED: xylem serine proteinase 1-like [Populus euphratica]	65.03	0	sp|Q9LLL8|SBT4E_ARATH	Subtilisin-like protease SBT4.14 OS=Arabidopsis thaliana GN=SBT4.14 PE=2 SV=1	-	-	-	-	-	-	-	K15333|1|3e-78|279|nsy:104224633|tRNA guanosine-2'-O-methyltransferase [EC:2.1.1.34]!K12619|2|2e-51|197|ghi:107940264|5'-3' exoribonuclease 2 [EC:3.1.13.-]!K14568|3|7e-30|130|dct:110101229|rRNA small subunit pseudouridine methyltransferase Nep1 [EC:2.1.1.260]!K13199|5|1e-18|95.1|mtr:MTR_7g081660|plasminogen activator inhibitor 1 RNA-binding protein		GO:0004252//serine-type endopeptidase activity;GO:0032440//2-alkenal reductase [NAD(P)] activity	-
3177	PSS32621.1	Protein TONNEAU 1a like [Actinidia chinensis var. chinensis]	30088.1	0.056	1	1	PSS34573.1	0.81	0.848|0.628|0.981|0.887|0.675|1.008|0.791|0.575|0.898	0.154	9	0.009059	PSS32621.1	MDDYTREMMDLKTLVTRTLEKKGVLAKIRAELRASVFEAIEEEDRAIEKEEGLPPALLGSCNDRAKQLHASPSGRLLTALVCEYLDWAQLSHTQKVYLPECNLQKDFWKAELEEFGSKNGYDLNRNGDSAPLLLDVLEGFLKYENLSQARSTGRRLTTPETESLSNLESRNIRRPSSSSVAGGLPPLGRPLPVSQASDRRGGSSMSGYRKDEYNWRYDNNELSDDVIRTSAALENLQLDRKARNLTSSWRHAGDGITEDDGRVDRM	89.734	2e-174	XP_010101489.1	FGFR1 oncogene partner [Morus notabilis]	71.37	3e-124	sp|Q9FQ25|TON1A_ARATH	Protein TONNEAU 1a OS=Arabidopsis thaliana GN=TON1A PE=1 SV=1	-	-	-	-	-	-	-	K16546|1|3e-174|484|zju:107413629|FGFR1 oncogene partner	-	-	-
3195	PSS01645.1	Sucrose-phosphatase [Actinidia chinensis var. chinensis]	48364	0.313	3	6	-	0.83	0.856|0.810|0.760|0.925|0.934|0.813|0.834|0.804|0.735	0.067	9	0.0001028	PSS01645.1	MDRLSSSARVMIVSDLDHTMVDHHDSENLSLLRFNALWEAYYRHDSLLVFSTGRSPTLYKELRKEKPMLTPDITIMSVGTEITYDTSMVPDEGWVEVLNQKWDRNIVMEETSKFSELKLQAETEQRPHKVSFYVQKDKAQEVMKTLSDKLVKRGLDVKIIYSGGMDLDILPQGAGKGQALAYLHKKFKTEGKLPQNTLVCGDSGNDAELFTIPEVHGVMVSNAQEELLHWHAENAKNNPKVIHATERCASGIIQAIGHFNLGPSISPRDVMDSSDSVPENFEPGHDIVRFFLFLERWRRAEMEYSELYLAGLKALSFPSSAFVHPSGIEQSILDCTNALRSSYGDEQGKQYRVWVDQVTTTEIGSNIWLLKFNKWEISGDERRGCIATVLLSSKDLSPS…	99.294	0	AAS79795.1	sucrose phosphate phosphatase [Actinidia chinensis]	73.29	0	sp|Q5IH13|SPP2_TOBAC	Sucrose-phosphatase 2 OS=Nicotiana tabacum GN=SPP2 PE=2 SV=1	-	-	-	-	-	-	-	K07024|1|0.0|697|sind:105161697|sucrose-6-phosphatase [EC:3.1.3.24]	GO:0005986//sucrose biosynthetic process	GO:0000287//magnesium ion binding;GO:0050307//sucrose-phosphate phosphatase activity	-
3206	PSS25979.1	Heavy metal-associated isoprenylated plant protein [Actinidia chinensis var. chinensis]	17339.8	0.195	1	1	-	0.66	0.706|0.687|0.850|0.612|0.618|0.719|0.566|0.529|0.653	0.095	9	1.823e-05	PSS25979.1	MGALDHLSNIFDCSSGSSKLKKRKQLQTVEIKVKIDCEGCERRVRRAVEGMKGVQSVDIEPKQHKLTVVGYVEPDKVVARVAHRTGKKAELWPYVPYDVVAHPYAPGVYDRKAPAGYVRYSEDPNVSQLARASSTEVRYTTAFSDENPAACIVM	89.61	2e-101	XP_011088612.1	heavy metal-associated isoprenylated plant protein 26-like [Sesamum indicum]	81.17	2e-92	sp|Q9SZN7|HIP26_ARATH	Heavy metal-associated isoprenylated plant protein 26 OS=Arabidopsis thaliana GN=HIPP26 PE=1 SV=1	At4g38580	264	4e-92	KOG1603	Copper chaperone	P	Inorganic ion transport and metabolism	K10752|1|4e-87|260|mdm:103421028|histone-binding protein RBBP4!K07213|3|7e-14|67.0|lsv:111900750|copper chaperone	GO:0046916//cellular transition metal ion homeostasis;GO:0030001//metal ion transport	GO:0046872//metal ion binding;GO:0046914//transition metal ion binding	GO:0005737//cytoplasm
3232	PSS33415.1	Arsenical pump-driving ATPase [Actinidia chinensis var. chinensis]	34665	0.119	2	3	-	0.72	0.778|0.805|0.700|0.806|0.839|0.719|0.643|0.653|0.575	0.089	9	5.189e-05	PSS33415.1	MATYFLTSSMSSPSLLKYPETNSMAAIGFLSHSSKSHLVRSVAAPSETTTGFDEMVSGTKRKYYMLGGKGVVGKTSCAASLAVKFANSGHPTLVVSTDPAHSLSDSFAQINPEKAREEFRSASQKNGGTGIKDFMDGMGLGMIVDQLGELKLGELLDTPPPGLDEAIAISKLKQKIASATSAIKSVFGQEGTQQDAADKLERLRERMVKVRELFRDTDSTEFVIVTIPTVMAVSESSKLRASLKKENVPVKRLIVNQILPPSASDCIFCAMKRKDQTRALDMIRSGPEFLDLTLIQAPLVDVEIRGVPALKFLGDIVWK	65.207	1e-166	XP_010112216.1	Putative arsenical pump-driving ATPase [Morus notabilis]	-	-	-	-	At3g10350	428	1e-150	KOG2825	Putative arsenite-translocating ATPase	P	Inorganic ion transport and metabolism	K01551|1|7e-167|474|rcu:8268560|arsenite/tail-anchored protein-transporting ATPase [EC:3.6.3.16 3.6.3.-]		GO:0015446//ATPase-coupled arsenite transmembrane transporter activity;GO:0016887//ATPase activity;GO:0005524//ATP binding	-
3253	PSS31297.1	V-type proton ATPase subunit a3 like [Actinidia chinensis var. chinensis]	93607.5	0.025	1	1	-	0.83	0.710|0.815|0.780|0.959|1.093|1.023|0.653|0.722|0.689	0.159	9	0.01065	PSS31297.1	MGGCYPTMDLLRSEQMQLAQLIIPIESAHRTVSYLGDLGLFQFKDLNAEKSPFQRTYASQIKRCGEMARKLRFFKEQMVKAGFSPSTMYTNGNNINVDDLEVKLGELEAELLEMNANSEKLQRAYSELLEYKLVLQKAGEFFYSAQSNATAQQREYEAHHLGEGSIDSPLLMEQEMSTDPLKQVKLGSVSGLVPREKSMAFERILFRATRGNVFLKQSMVEDPVIDPVSGAKVEKNVFIVFYSGERAKNKILKICDAFGANRYPFTDDIGKQYQMITEVSGKLSELQTTIDVGLLHRDNLLQTISHQFECWNLLVKKEKSIYHTLDMLSIDVTKKCLVAEGWCPVFATNKIQDAMQQGTFDSNSQVGAIFQVLHTKESPPTYFRRNKFTSSFQEIVDAY…	83.19	0	XP_021283709.1	V-type proton ATPase subunit a3-like isoform X1 [Herrania umbratica]	77.13	0	sp|Q8W4S4|VHAA3_ARATH	V-type proton ATPase subunit a3 OS=Arabidopsis thaliana GN=VHA-a3 PE=1 SV=1	At2g21410	1285	0	KOG2189	Vacuolar H+-ATPase V0 sector, subunit a	C	Energy production and conversion	K02154|1|0.0|1414|vvi:100255659|V-type H+-transporting ATPase subunit a	GO:0015986//ATP synthesis coupled proton transport;GO:0015991//ATP hydrolysis coupled proton transport;GO:0007035//vacuolar acidification;GO:0070072//vacuolar proton-transporting V-type ATPase complex assembly	GO:0051117//ATPase binding;GO:0046961//proton-transporting ATPase activity, rotational mechanism;GO:0015078//hydrogen ion transmembrane transporter activity	GO:0000325//plant-type vacuole;GO:0016021//integral component of membrane;GO:0016471//vacuolar proton-transporting V-type ATPase complex;GO:0000220//vacuolar proton-transporting V-type ATPase, V0 domain
3260	PSS00152.1	Protein TIC 40 like [Actinidia chinensis var. chinensis]	48794	0.335	3	4	-	0.69	0.871|0.604|0.705|0.872|0.619|0.689|0.757|0.512|0.594	0.124	9	0.0002077	PSS00152.1	MENLALVSSPKMVLGCSANPKDMVSSRYPFSLPLLFCSKTTRIGPNRSTTLISALSQHARVSRAPPRLPKTNVLKKLGRECFASVTSSSSQETSSVGVNPQLAVPPPPSQFGSPLFWVGVGVGLSALFSLVATNLKKYAMQQAFKTLMGQMDSQNNQFNNAAFSPGPFSFPPPLASGPAASPPFPTSPPSKPATSPSPATYQSAVTIDTTATATKVEAPPATDVEDEPKRPKKYAFVDVSPAETLQRSPFGEFEETDQLDSSKDAEFADKVSQNGASSRPGDGAASEWSSSAGKTSSVLSVEALEKMMEDPTVQKMVYPYLPEEMRNPTTFKWMLQNPQYRQQLEEMLNNMGGSTEWDNRMMDSLKNFDLSSPEVKQQFDQIGLTPEEVISKIMANPDV…	63.235	0	XP_012077827.1	protein TIC 40, chloroplastic [Jatropha curcas]	58.85	6e-165	sp|Q8GT66|TIC40_PEA	Protein TIC 40, chloroplastic OS=Pisum sativum GN=TIC40 PE=1 SV=1	At5g16620	398	1e-135	KOG1308	Hsp70-interacting protein Hip/Transient component of progesterone receptor complexes and an Hsp70-binding protein	OT	Posttranslational modification, protein turnover, chaperones;Signal transduction mechanisms	K06691|1|1e-35|140|apro:F751_6784|26S proteasome regulatory subunit N13!K09560|2|6e-08|57.8|mpp:MICPUCDRAFT_28186|suppressor of tumorigenicity protein 13	GO:0009658//chloroplast organization;GO:0045037//protein import into chloroplast stroma		GO:0009535//chloroplast thylakoid membrane;GO:0009706//chloroplast inner membrane
3262	PSR89699.1	Vesicle-associated membrane protein [Actinidia chinensis var. chinensis]	24962.8	0.327	1	1	-	0.65	0.581|0.667|0.731|0.752|0.862|0.932|0.407|0.428|0.469	0.19	9	0.001588	PSR89699.1	MGQQSLIYSFVARGTVILADYTEFTGNFVSIASQCLQKLPATNNKFTYNCDGHTFNYLVEDGFTYCVVAAESAGRQIPMAFLDRIKEDFTKRYGGGQVATAAANSLNREFGPKLKEQMQYCVDHPEEISKLAKVKAQVSEVKGVMMENIEKVLDRGEKIELLVDKTDNLRSQAQDFRTQGTQIRRKMWFQNMKIKLIVLAILLAIIMIIVLSICGGGKCT	85.845	2e-146	XP_009588661.1	PREDICTED: vesicle-associated membrane protein 721 [Nicotiana tomentosiformis]	81.36	6e-135	sp|Q9MAS5|VA726_ARATH	Putative vesicle-associated membrane protein 726 OS=Arabidopsis thaliana GN=VAMP726 PE=2 SV=2	At2g32670	378	9e-135	KOG0859	Synaptobrevin/VAMP-like protein	U	Intracellular trafficking, secretion, and vesicular transport	K08511|1|4e-147|412|nto:104086170|vesicle-associated membrane protein 72	GO:0006887//exocytosis;GO:0016192//vesicle-mediated transport;GO:0006906//vesicle fusion	GO:0000149//SNARE binding;GO:0005484//SNAP receptor activity	GO:0031201//SNARE complex;GO:0016021//integral component of membrane
3330	PSS06322.1	Protochlorophyllide reductase [Actinidia chinensis var. chinensis]	41449.4	0.183	1	2	-	0.78	1.304|0.792|0.967|0.968|0.588|0.696|0.727|0.425|0.518	0.271	9	0.02906	PSS06322.1	MALQAGALLPSAFSIPEEGKSTLKDPIFLGISFSDYVRTECSFALRIKKETNQRKLFHVRAQSVETTTQAVKQATSDGKKTHRKGSVVITGASSGLGLATAKALAETGKWDIIMACRDFLKAERAAKWPALPRSTTQRSGRPLDVLVCNAAVYLPTAKEPTFTAEGFELSVGTNHLGHFLLSRLLLDDLKQSDYPSKRLVIVGSITGNTNTLAGNVPPKANLGDMRGLAGGLNGLNRSAMVDGGEFDGAKAYKDSKVCNMLTMQEFHRCYHEETGITFASLYPGCIATTGLFREHIPLFRILFPPFQKYITKGFVSEEESGKRLAQVVSEPSLTKSGVHWSWNKDSASFQNRVSQEASDSEKARKVWELSEKLVGLA	74.634	0	APO15140.1	protochlorophyllide reductase [Camellia sinensis]	75.75	0	sp|Q41249|PORA_CUCSA	Protochlorophyllide reductase, chloroplastic OS=Cucumis sativus GN=PORA PE=2 SV=1	At5g54190	563	0	KOG1208	Dehydrogenases with different specificities (related to short-chain alcohol dehydrogenases)	Q	Secondary metabolites biosynthesis, transport and catabolism	K00218|1|0.0|597|jcu:105644244|protochlorophyllide reductase [EC:1.3.1.33]		GO:0016630//protochlorophyllide reductase activity	-
3334	PSS07533.1	hypothetical protein CEY00_Acc17881 [Actinidia chinensis var. chinensis]	40317.1	0.122	4	5	-	0.76	0.663|0.767|0.855|0.759|0.828|0.910|0.613|0.700|0.780	0.094	9	0.0001688	PSS07533.1	MAGVSVLSAEVLLSKRVQEMVLNGEEPPAPYISRDDDPSDDDDSTVSPIPIIDLSVLSHTTASTEEYEEELQKLKSALHTWGCFQAINHGISSSFIDEILQVTREFFEQPMEEKKKYSKTVVEVDGYGADPVPEEGQSLDWSDRLFLDVYPEDLRKPKFWPESPSSFGEVLREYTEKTKMVIEVISKAMAKSLNLEENCFLNQFGERAMLQARFNYYSKCQRPDLILGLKPHADGSGYTSILPDEVGLQVFNNDKWHTVPKISHAILILMGDQMEIMTNGVFKSPVHRVLSNSERDRISVAMFYTPEKGKEIGPEDGLVDDERPRLFKKVKDYAEIHWDYYQRGLRALHTAQA	73.371	0	XP_002271635.1	PREDICTED: protein SRG1 isoform X1 [Vitis vinifera]	37.45	1e-65	sp|O80449|DIOX4_ARATH	Probable 2-oxoglutarate-dependent dioxygenase ANS OS=Arabidopsis thaliana GN=ANS PE=2 SV=1	At1g49390	338	6e-115	KOG0143	Iron/ascorbate family oxidoreductases	QR	Secondary metabolites biosynthesis, transport and catabolism;General function prediction only	K05278|1|2e-58|196|cpap:110816514|flavonol synthase [EC:1.14.20.6]!K05277|5|8e-55|187|ghi:107926986|anthocyanidin synthase [EC:1.14.20.4]		GO:0008168//methyltransferase activity;GO:0046872//metal ion binding;GO:0016491//oxidoreductase activity	-
3342	PSR98531.1	Oxygen-evolving enhancer protein like [Actinidia chinensis var. chinensis]	23435.6	0.511	5	37	-	0.83	1.248|0.800|0.851|0.908|0.606|0.615|1.007|0.683|0.731	0.207	9	0.02624	PSR98531.1	MVQAMASMSGLVSGSTRLSPATGSSRATMTRSGLIVRAQQVQGEPETSRRAVLSLVAAGLASGSFVQAVLAEAKPIKVGPPPPPSGGLPGTLNSDEPRDLELPLKERFFLQPLSPAEAAVRAKESAKDIVNVKEFIDKKAWPYVQNDLRLKASYLRYDLNTVISSKPKDQKKPLKDLAGKLFQDISNLDHAAKIKSTPEAEKYYAVAVSTLNDVLAKIG	73.729	3e-113	ACJ61487.1	oxygen-evolving enhancer protein 3 [Glycine max]	63.68	1e-101	sp|Q41932|PSBQ2_ARATH	Oxygen-evolving enhancer protein 3-2, chloroplastic OS=Arabidopsis thaliana GN=PSBQ2 PE=1 SV=2	-	-	-	-	-	-	-	K08901|1|3e-113|327|pxb:103956260|photosystem II oxygen-evolving enhancer protein 3	GO:0015979//photosynthesis	GO:0005509//calcium ion binding	GO:0019898//extrinsic component of membrane;GO:0009654//photosystem II oxygen evolving complex
3357	PSS07214.1	Histone acetyltransferase [Actinidia chinensis var. chinensis]	183971	0.006	1	1	PSS18205.1	0.83	0.716|0.842|1.056|0.688|0.811|0.991|0.657|0.748|0.937	0.141	9	0.006825	PSS07214.1	MNMQAHVSRQISGQIPNQAGTQLPGVPQQNGSSLSNQIQNLGGYPNTPNMEPELVKARKFMQEKIYAFLMQRQQQAHDIQPKRVLDIVRRLDEGLFRNAATKEEYVNLETLENRLHVLIKRLPMSNHNQQYPQLVNSSSPTGTMIPTPGIPHSGNASIMVTSSADTSMVTAGGSKSMAPGTVNTGSMLPTANGPSVGLHGGSFNSSDGTMSNGYQQSPANFSISSSGNNMVSSNDVQRATSQMIPTPGFNTNNNQSFMNLASSNNDGAFSTVESKMVSLPLQQKQHIVGQNSRILHNLDSNISSGSRSGLQQKSCGFSNGALNGGSGMMRNNLQLINGLGTSEGYLTATPYGNSPKPLHHYDQHQRPMMQGDGYGMSNPNSSGSGDFYGPVTSSSSAMN…	88.177	0	XP_011085475.1	histone acetyltransferase HAC1-like isoform X2 [Sesamum indicum]	86.74	0	sp|Q9C5X9|HAC1_ARATH	Histone acetyltransferase HAC1 OS=Arabidopsis thaliana GN=HAC1 PE=1 SV=2	At1g79000	1478	0	KOG1778	CREB binding protein/P300 and related TAZ Zn-finger proteins	K	Transcription	K04498|1|0.0|1543|sind:105167446|E1A/CREB-binding protein [EC:2.3.1.48]	-	-	-
3364	PSS07277.1	Pectinesterase [Actinidia chinensis var. chinensis]	63707.1	0.33	8	15	-	0.7	0.573|0.889|0.564|0.583|0.941|0.561|0.624|1.029|0.569	0.191	9	0.001953	PSS07277.1	MTHIKDIFAGMSDSGNRISLSKKSKKLFFALFASLLLIAAVIGIVAGVNKSDKNTMKSTTSHAIVKSSCSITTYPDLCYSSMASVPGMSEKVSSPKDVILASLNLTTTTVEQNYFTVKKIMKRKSLTEREKTALHDCLEMIDETLDELHKVEDDLNEYPNKKSLKQHADDLITLMSAAMTNQETCLDGFSHDGADKRVREALAAGQIHVEKMCSNSLAMIKNMTDGDIADALRVSGRKMEEEGGGNRWPEWLSAGDRRLLQSSTVTPNVVVAADGSGNYKTVSAAVAAAPEKSSKRYVIKIKAGVYRENVDVPKKKTNLMFVGDGRTNTIITASRNVVDGSTTFHSATVAVVGERFLARDITFQNTAGPSKHQAVALRVGADLSAFYRCDMLAYQDTLY…	76.46	0	XP_012445358.1	PREDICTED: pectinesterase-like [Gossypium raimondii]	74.02	0	sp|P83948|PME3_CITSI	Pectinesterase 3 OS=Citrus sinensis PE=1 SV=1	-	-	-	-	-	-	-	K01051|1|0.0|946|gra:105769342|pectinesterase [EC:3.1.1.11]	GO:0042545//cell wall modification;GO:0045490//pectin catabolic process	GO:0046910//pectinesterase inhibitor activity;GO:0030599//pectinesterase activity;GO:0045330//aspartyl esterase activity;GO:0004857//enzyme inhibitor activity	GO:0005618//cell wall;GO:0016021//integral component of membrane;GO:0071944//cell periphery;GO:0005576//extracellular region
3374	PSS10217.1	Nucleic acid-binding, OB-fold protein [Actinidia chinensis var. chinensis]	16724.6	0.167	2	2	PSS24622.1	0.79	0.827|0.714|0.944|0.905|0.785|1.012|0.651|0.547|0.721	0.149	9	0.004544	PSS10217.1	MSTTAQPPQNQGSGGGSVPKAGMRKPVFVKVDQLKPGTNGHTLTVKVVSSTTVVQRKGNSNSHLGRGGGGQSLAECLVGDETGTILFTARNDQVDLMKPDTTVILRNAKIDMFKGAMRLAVDKWGRVEVTEPAEFVVKEDNNLSLVEYELANVVEE	72.903	6e-74	XP_010098441.1	hypothetical protein L484_012156 [Morus notabilis]	70.45	6e-62	sp|O49453|Y4844_ARATH	Uncharacterized protein At4g28440 OS=Arabidopsis thaliana GN=At4g28440 PE=1 SV=1	-	-	-	-	-	-	-	K07466|1|1e-72|218|mcha:111010472|replication factor A1	-	-	-
3381	PSS11169.1	E3 ubiquitin-protein like [Actinidia chinensis var. chinensis]	70761	0.137	4	6	-	0.82	0.857|0.899|0.755|0.812|0.901|0.665|0.842|0.921|0.701	0.092	9	0.0006707	PSS11169.1	MAGKVADRPPASFDFELVEGDSGQLRTVKASPRQISPWIDPATIKLRHRIGRGPFGDVWLATHHQTTEDYVEYHEVAVKMLHSIREDLIKIVLDKFSDLFCKCQSLKGVCLLQGISIIGGKVCIVMKFYEGSVGDKMSRLKGGKLSLHSIMRYGIDLAQGIMELHSKEILVLNLKPFNFLLNENDGAVLGDLGIPYMLLGIPLLSSDMAHRLGTPHYMAPEQWQPEVRGPISFETDSWGFGCSIVEMFTGNQPWRGKSVNEIYNLVVKKQEKPLIPSGLPPAVENVIIGCFEYDLRSRPVMADILHAFRSSQNAVHRDDGWTGLSSRAIIEKSSGSGYTEWFLAKDHLQVGDMVRSRKQSNSCKLENMDLPEGTIVGLDADTDQNGFVLVRVHGIHDPV…	73.059	0	XP_009767221.1	PREDICTED: E3 ubiquitin-protein ligase KEG [Nicotiana sylvestris]	32.56	2e-33	sp|Q9FY48|KEG_ARATH	E3 ubiquitin-protein ligase KEG OS=Arabidopsis thaliana GN=KEG PE=1 SV=2	At4g32250	789	0	KOG0198	MEKK and related serine/threonine protein kinases	T	Signal transduction mechanisms	K16279|1|2e-38|157|zma:103630320|E3 ubiquitin-protein ligase KEG [EC:2.7.11.1 2.3.2.27]		GO:0016874//ligase activity;GO:0005524//ATP binding;GO:0004672//protein kinase activity	GO:0016021//integral component of membrane
3406	PSR92578.1	Protein pleiotropic regulatory locus 1 like, partial [Actinidia chinensis var. chinensis]	21220.8	0.066	1	1	-	0.78	0.718|0.692|1.077|0.581|0.696|0.908|0.651|0.650|1.011	0.177	9	0.005141	PSR92578.1	MPGPTLEMEPVEPQSLKKLSFKSLKRSLDFFSPLHSHFPPPDPDSKKIRISHKFNAEYGGIKSNSQPPANAKSVAQDQAQQASGTSNALALPGPENSMDPRNGGAQTNLIVGPTVQAKGLDVALSGKSTAVVSAPGSSERNLSTSAIMERIPSKWPRPVWHPPWKNYRVISGHLGWVRSIAFDPSNTWFCTGSADR	76.65	4e-100	XP_002262991.2	PREDICTED: protein pleiotropic regulatory locus 1 [Vitis vinifera]	56.38	4e-68	sp|Q39190|PRL2_ARATH	Protein pleiotropic regulator PRL2 OS=Arabidopsis thaliana GN=PRL2 PE=2 SV=2	At3g16650	215	8e-68	KOG0285	Pleiotropic regulator 1	A	RNA processing and modification	K12862|1|7e-101|303|vvi:100248018|pleiotropic regulator 1	GO:0000398//mRNA splicing, via spliceosome		GO:0071011//precatalytic spliceosome;GO:0071013//catalytic step 2 spliceosome;GO:0080008//Cul4-RING E3 ubiquitin ligase complex;GO:0000974//Prp19 complex
3407	PSR91022.1	THO complex subunit like [Actinidia chinensis var. chinensis]	214861	0.005	1	1	-	0.75	0.803|0.757|0.762|0.908|0.859|0.846|0.628|0.573|0.575	0.125	9	0.0007734	PSR91022.1	MSLPSVECVYVTEECVREWKNGNSIFKAPIPVPVLRFLYELCWTMVRGELPFQKCKAALESVEFLDQVLDEEMGSNFVDVVTQMAQDLTMTGEHRARLIKLAKWLVESAIVPLRLFQERCEAKWLVESAIVPLRLFQERCEEEFLWESEMIKIKAADLKSKEVTLLRQGSEASTQNTSAATVGIIKSLIGHFDLDPNRVFDIVLECFELQPSNSVFLDLIPIFPKSHASQILGFKFQYYQRMEVNHSVPFGLYQLTALLVKEDFIDLDSIYSHLLPKDDEAFEHYNAFSAKRFDEANKIGKINLAATGKDLMDDEKQGDVTIDLFSALDIESEAVTERASELENNQTLGLLTGFLSVNDWYHAHILFDRLSPLNPAEHSQICNELFRLIEKSLSSANEL…	77.202	0	XP_010649318.1	PREDICTED: THO complex subunit 2 isoform X4 [Vitis vinifera]	65.55	0	sp|F4IAT2|THOC2_ARATH	THO complex subunit 2 OS=Arabidopsis thaliana GN=THO2 PE=1 SV=1	At1g24706	1984	0	KOG1874	KEKE-like motif-containing transcription regulator (Rlr1)/suppressor of sin4	K	Transcription	K12879|1|0.0|2875|vvi:100254201|THO complex subunit 2	-	-	-
3507	PSS10375.1	5'-adenylylsulfate reductase like, partial [Actinidia chinensis var. chinensis]	29937.5	0.152	3	5	-	0.65	0.867|0.651|0.501|0.836|0.634|0.428|0.816|0.620|0.479	0.162	9	0.0006412	PSS10375.1	QKYKFWSKTQIQTAKSKHFEREGLGRSVMALAITSSTSTSTSSRFEASRDQTTKGLLFGSFQPLDRTHSQSTIVNYSRRQCSVKPLNAESKRNDSIVPLAATIVAPEVVEKIEVEDYEKLAKELQNASPLEIMDKALEKFGNDIAIAFSGAEDIALIEYARLTGRPFRVFSLDTGRLNPETYKFFDTVEKHYGIHIEYMFPDAVEVQALVRSKGLFSFYEDGHQECCRVRKVRPLRRALKGLRAWITGQRKDQSPGTRAEVPI	81.435	6e-135	AAB05871.2	PAPS-reductase-like protein [Catharanthus roseus]	69.33	4e-110	sp|P92980|APR3_ARATH	5'-adenylylsulfate reductase 3, chloroplastic OS=Arabidopsis thaliana GN=APR3 PE=2 SV=2	At4g21990_1	326	1e-111	KOG0189	Phosphoadenosine phosphosulfate reductase	E	Amino acid transport and metabolism	K05907|1|2e-134|390|vvi:100854884|adenylyl-sulfate reductase (glutathione) [EC:1.8.4.9]	GO:0019419//sulfate reduction;GO:0019344//cysteine biosynthetic process;GO:0045454//cell redox homeostasis	GO:0016671//oxidoreductase activity, acting on a sulfur group of donors, disulfide as acceptor;GO:0004604//phosphoadenylyl-sulfate reductase (thioredoxin) activity	GO:0005737//cytoplasm;GO:0005623//cell
3514	PSS26287.1	Rhodanese-like domain-containing protein [Actinidia chinensis var. chinensis]	46803.1	0.276	10	28	-	0.74	0.844|0.765|0.716|0.798|0.734|0.659|0.776|0.731|0.660	0.061	9	4.263e-06	PSS26287.1	MEALNAVGLTPISVLSDRRSDPRKFFPISTTSSLKPTNSANFITNPPNPRNFHKGLVLFSSVLNAGFARALTYEEALQQLVSPRTSLDSFDFDFGGFVDGVVSFGVENPVVVAGGAAIALVPLIVYQVFVKKPKPWGVESARKAYEKLGDDGNAQLLDVREPAELRQVGGPDVRGLKKKPVSIVYRGKDKASFLKKLSLKFKEPQNTTLFILDKFDGNSELVAELVTSNGFKAAYAIKDGAEGPRGWLNSSLPWIPPKKTLSLDFSDLTDAIGDAIGEGSDALPVTLGIAAATGIGLLAFTEVETLLQLLGSAALLQVISKKLLFAEDRKQTLQQVDEFLTTKVAPKELVDEIKQIGKALLPAKVTSKALPAPTEASPTITEDAVQKAEAVAVPTPQVN…	67.991	0	XP_007219299.2	rhodanese-like domain-containing protein 4, chloroplastic [Prunus persica]	55.25	2e-151	sp|Q9M158|STR4_ARATH	Rhodanese-like domain-containing protein 4, chloroplastic OS=Arabidopsis thaliana GN=STR4 PE=1 SV=2	At3g25480	94.7	3e-20	KOG1075	FOG: Reverse transcriptase	R	General function prediction only	K17525|1|0.0|582|pper:18785717|chitinase domain-containing protein 1	GO:0006032//chitin catabolic process	GO:0004568//chitinase activity;GO:0008061//chitin binding	GO:0005576//extracellular region
3540	PSR95710.1	Vacuolar cation/proton exchanger like [Actinidia chinensis var. chinensis]	62329.8	0.021	1	2	PSR96389.1	0.72	0.516|1.097|0.509|0.602|1.216|0.578|0.491|0.993|0.460	0.296	9	0.01381	PSR95710.1	MATRPPRPQPLSLLSVLLSLLLLTASAEGRLIAGGSPSDLVSDGVSRPLLLRLGAADSCDQTYGFMPCTATAAGNLFLIAVYGYLMYLGATYLSNGSELLLEILGPGIVGGLFLPILGALPDAMLILVSGLSGTTATAQSQVSVGMGLLAGSTVMLLTVIWGTCVIVGKCDLQDSIAVDGKDTKGFSLTGSGVSSDIWTSYAARIMAISIIPFLVVQIPQVMHSTSGKHLAVLIALIVSLLMLISYCLYQVFQPWIQRRRLVYAKHKHVISGILRHLKKQTLGRLLGDDGKPNEEMIEKLFKKVDGNGDGYISETEMRALIVGIRFDEIHLDEDEAMKKVMTEFDTSSDSRIDLPEFIAGITKWLEVAKHSGAASVEAGPTTIKHLDNFHLQTKREHDL…	75.313	0	OMO74858.1	Calcium-binding EF-hand [Corchorus capsularis]	70.88	0	sp|Q8L636|NCL_ARATH	Sodium/calcium exchanger NCL OS=Arabidopsis thaliana GN=NCL PE=2 SV=1	YDL128w	53.5	4e-07	KOG1397	Ca2+/H+ antiporter VCX1 and related proteins	P	Inorganic ion transport and metabolism	K13448|1|6e-08|57.0|nnu:104600815|calcium-binding protein CML!K07300|2|7e-07|56.6|cqi:110713137|Ca2+:H+ antiporter	GO:0055085//transmembrane transport	GO:0005509//calcium ion binding	GO:0016021//integral component of membrane
3563	PSS06085.1	hypothetical protein CEY00_Acc19358 [Actinidia chinensis var. chinensis]	42372.8	0.026	1	1	-	0.83	0.873|0.649|0.839|0.916|0.723|0.885|0.939|0.727|0.939	0.107	9	0.002679	PSS06085.1	MDSPQSVVSPFKGSSVFAEPEKLKAEGRKLEGIIGTLDVYIHQARDIHNICIYHKQDVYAKICLTSDPEKTISTQTINGGGRNPVFNEKLRLNVRTIDSYLKCEIWMLSRVRNYLEDQLLGFALVPLSEVLVKNGKLEKEFSLSSTDLFHSPAGFVQLLLSYTGASPEVMAISAENVAVQDLEVAEPLPSEFDKIEFPDPKIVNENQMMVSEYLDSQNRESFVSSDTENQHCSETEVYVESVSKHDSPLSSVSTTNGKSQSSDSSVASESSNLESVSPPKENLKAKGEDIGDSESNATGGGSYSTIAKPVVTVNIEPEQKVVQQDIVDMYMKSMQQFTDSLAKMKLPMDIESPPTDSGNSSSDQNSQGSKNTGSRVFYGSRAFF	64.138	2e-178	XP_018812618.1	PREDICTED: uncharacterized protein LOC108984960 [Juglans regia]	32.67	2e-07	sp|O04133|SRC2_SOYBN	Protein SRC2 OS=Glycine max GN=SRC2 PE=2 SV=1	-	-	-	-	-	-	-	K00895|1|9e-12|71.2|dct:110098534|diphosphate-dependent phosphofructokinase [EC:2.7.1.90]	-	-	-
3566	PSS14414.1	Fatty acid hydroperoxide lyase [Actinidia chinensis var. chinensis]	53297.1	0.444	8	25	-	0.82	0.954|0.814|0.833|0.791|0.738|0.731|0.909|0.791|0.808	0.073	9	0.0001123	PSS14414.1	MATMMSASTSITQPRPGSARTIPGGYGWPVVGPILDRLDYFWFQGPETFFRKRIEKNKSTVFRTNVPPTFPLFARVNPNVIAVLDVKSFSHLFDMDVVEKADTLVGDFMPSVSFTGGMRVCAYLDTSEPKHSKIKGFAMDILKRSSATWFPTVLSELDSMWSTIDTEFSSSTSASYFVPLQQCIFSFLSQCLVGANPAASPNIANHGYAMLDLWLGLMLLPTVKIGFLQPLEEIFLHSFAYPSFLVSGGYNKLLKFVEEEGKEVVERGVREFGLTRDEAVHNVLFVLGFNAYGGFSIFFPSLLGILGSDVIVQEKLREEARAKGGSTLSFNSVKDMELVQSFVYETLRLNPPVPTQYGRARKDFLLSSHDSVFEIKKGELLCGYQPLVMRDPMVFDEPE…	75.93	0	BAU24783.1	CYP74B24 [Camellia sinensis]	66.81	0	sp|K4CF70|HPL_SOLLC	Fatty acid hydroperoxide lyase, chloroplastic OS=Solanum lycopersicum GN=HPL PE=1 SV=1	7292651	55.1	1e-07	KOG0157	Cytochrome P450 CYP4/CYP19/CYP26 subfamilies	QI	Secondary metabolites biosynthesis, transport and catabolism;Lipid transport and metabolism	K10528|1|0.0|687|nto:104111680|hydroperoxide lyase [EC:4.1.2.-]		GO:0016829//lyase activity;GO:0004497//monooxygenase activity;GO:0016705//oxidoreductase activity, acting on paired donors, with incorporation or reduction of molecular oxygen;GO:0005506//iron ion binding;GO:0020037//heme binding	-
3570	PSS13553.1	Glutathione S-transferase [Actinidia chinensis var. chinensis]	25976.4	0.244	3	6	-	0.57	0.544|0.454|0.880|0.495|0.422|0.745|0.483|0.386|0.716	0.17	9	0.0002207	PSS13553.1	MAATNTSSDVKLIGAWPSPFVMRPQIALNIKSVGYEFLQEQLGSKSELLLKSNPVHKKIPVLIHGDRPICESLVIVQYIDAVWASGPSILPSDPYDCATARFWAAYIDEKWFPSLSGIAKAQGEEAKKAALDQVVEGLVLLEDAFVKCSKGKAFFGGDTIGYLDIALGCYLGWIRVTEKMNNRKLLDEAKTPNLVTWADKFCSDGSVKDVMPETDKLAEFAKVLMAKFRAPPPN	77.293	3e-132	XP_010043849.1	PREDICTED: glutathione S-transferase U17 [Eucalyptus grandis]	70.35	3e-112	sp|Q9FUS8|GSTUH_ARATH	Glutathione S-transferase U17 OS=Arabidopsis thaliana GN=GSTU17 PE=2 SV=1	At1g10360	300	1e-103	KOG0406	Glutathione S-transferase	O	Posttranslational modification, protein turnover, chaperones	K00799|1|5e-133|377|egr:104432947|glutathione S-transferase [EC:2.5.1.18]	GO:0009407//toxin catabolic process;GO:0006749//glutathione metabolic process	GO:0016740//transferase activity;GO:0004364//glutathione transferase activity	GO:0005737//cytoplasm
3579	PSS19318.1	Methionine aminopeptidase [Actinidia chinensis var. chinensis]	50449.7	0.131	2	2	-	0.8	0.871|0.852|0.769|0.857|0.841|0.744|0.803|0.777|0.697	0.059	9	1.927e-05	PSS19318.1	MQAILMEKEELKAVLSIEEKGTSESVGCKDTSNLSSVLQKEVGEKVDNLALDELRVETDLPEGAKKNKKKSKSKKKKELQEQTDPPSIPIVKLFPSGEFPEGETQQYKDDNLWRTTSEEKRELERLDKPIYNSVRRAAEVHRQVRKYIKRILKPGMLMIDLCETLENTVRKLISENGLQAGIAFPTGCSLNWVAAHWTPNSGDKTVLQYDDVMKLDFGTHIDGHIVDCAFTVAFNPMFDPLLEASREATNTGIKEAGIDVRLCDVGAAIQEVMESYEVDINGKVFQVKSIRNLNGHSIGRYQIHAGKSVPIVKGGEQTKMEEGEFFAIETFASTGKGYIREDLECSHYMKNFDVGHIPLRLPRAKQLLATINNNFSTLAFCRRYLDRLGETRYLMALKN…	84.332	0	XP_007142586.1	hypothetical protein PHAVU_007G000100g [Phaseolus vulgaris]	91.26	0	sp|Q56Y85|MAP22_ARATH	Methionine aminopeptidase 2B OS=Arabidopsis thaliana GN=MAP2B PE=2 SV=2	At3g59990	712	0	KOG2775	Metallopeptidase	R	General function prediction only	K01265|1|0.0|737|pvu:PHAVU_007G000100g|methionyl aminopeptidase [EC:3.4.11.18]	GO:0070084//protein initiator methionine removal	GO:0046872//metal ion binding;GO:0070006//metalloaminopeptidase activity	GO:0005737//cytoplasm
3590	PSS07270.1	ATPase [Actinidia chinensis var. chinensis]	105026	0.385	7	17	-	0.81	0.891|0.790|0.771|0.852|0.790|0.747|0.881|0.793|0.774	0.052	9	7.443e-06	PSS07270.1	MAEDLDKPLLDPENFTREGIDLERLPLEEVFEQLRTSRAGLTSEDAEVRLKIFGPNKLEEKPENKFLKFLSFMWNPLSWVMEAAALMAIVLANGGGEGPDWQDFVGILCLLLINSTISFLEENNAGNAAAALMARLAPKTKVLRDGHWQEQDAAILVPGDIISIKLGDIIPADARLLEGDPLKIDQSALTGESLPVTKRTGNEVYSGSTCKHGEIEAVVIATGVHSFFGKAAHLVDSTEVVGHFQKVLTAIGNFCICSIAVGMILEIIVMFPIQQRAYRKGINNLLVLLIGGIPIAMPTVLSVTLAIGSHRLSQQGAITKRMTAIEEMAGMDVLCSDKTGTLTLNRLTVDRNLIEVFNNDMDKEMVVLLAARAARLENQDAIDTAIVNMLADPKEARAN…	92.34	0	XP_019077806.1	PREDICTED: ATPase 10, plasma membrane-type [Vitis vinifera]	80.32	0	sp|Q43128|PMA10_ARATH	ATPase 10, plasma membrane-type OS=Arabidopsis thaliana GN=AHA10 PE=2 SV=2	At1g17260	1529	0	KOG0205	Plasma membrane H+-transporting ATPase	P	Inorganic ion transport and metabolism	K01535|1|0.0|1776|vvi:100265284|H+-transporting ATPase [EC:7.1.2.1]	GO:0006754//ATP biosynthetic process	GO:0008553//hydrogen-exporting ATPase activity, phosphorylative mechanism;GO:0005524//ATP binding	GO:0016021//integral component of membrane
3595	PSS17564.1	ATP-dependent RNA helicase ddx42 [Actinidia chinensis var. chinensis]	19579.7	0.202	2	3	-	0.8	0.894|0.743|0.818|0.938|0.808|0.864|0.762|0.637|0.698	0.096	9	0.0004397	PSS17564.1	MVMMACLQVTVSCCTILTNHSPPVSVPNCGYPNSVTKHHHSSLTSMIRFSLSSPSRTRRVLRRQQVIIKAAAKENMTTTTQKLGISVQTNPPESKLSELGVRNWPKWGCPPSKFPWTYSSKETCYLLKGKVKVYPDGSDDGVEIGAGDLVEFPKGMSCTWDVSEAVDKHYNFE	66.013	2e-62	XP_021983507.1	uncharacterized protein LOC110879366 [Helianthus annuus]	-	-	-	-	-	-	-	-	-	-	-	K06995|1|4e-63|195|han:110879366|uncharacterized protein	-	-	-
3599	PSR86137.1	HSP20-like chaperone protein [Actinidia chinensis var. chinensis]	17672.1	0.158	2	2	-	0.81	0.699|0.913|0.788|0.740|0.950|0.818|0.709|0.899|0.777	0.092	9	0.0004159	PSR86137.1	MAMIPSFFGNRRGSIFDPISLDVWDPFRNFQFPELSRENTSFVSTRVDWKETPEAHVFKADLPGLKKEEVKVEIEDDRVLQIRGERSVEKEEKNDTWHRVERSSGQFMRRFRFPENAKVDEVKASMENGVLTVTVPKEEVKKPDVKSIKISG	80	3e-89	XP_004505963.1	PREDICTED: 17.3 kDa class I heat shock protein-like [Cicer arietinum]	78.26	3e-90	sp|P05478|HSP16_SOYBN	18.5 kDa class I heat shock protein OS=Glycine max GN=HSP18.5-C PE=3 SV=1	At1g07400	226	6e-77	KOG0710	Molecular chaperone (small heat-shock protein Hsp26/Hsp42)	O	Posttranslational modification, protein turnover, chaperones	K13993|1|5e-90|264|cam:101504192|HSP20 family protein			GO:0016021//integral component of membrane
3624	PSS28799.1	Pentatricopeptide repeat-containing protein [Actinidia chinensis var. chinensis]	73407.3	0.055	1	1	-	0.8	0.796|0.884|0.861|0.849|0.937|0.896|0.640|0.686|0.667	0.11	9	0.001303	PSS28799.1	MHRSHMRLNETTFSTVLSVCARLRSLHDGKQVHGLVLKSGSESSKLVGSALLYFYANCFEIKEAKQVFDLLHEGNELLWSLMLVGYVQCNLMSDAMDVFNRMPACDVVAWTALISGYLKSEDGCEKALQLFLVMRETGEVPPNEFTFDCVLRACGRVGDVREGRIVHGLLIRYGFEFEHSIGGALIDFYCICKAMDDAKRVYDRLVNPCLNASNALIEGLILMGKVDEAETIFDGLTEKNSVTYNLMIKGYSLSGRVDDSERLFSEVPQRTILTLNTMISVYSRNREIDKALELFDKTKGERDPVTWNTMISGHIQSAQHEEALRLYVSMRRLSIGQTQSTFSVLFHACSCLGSLQQGQVLQAHLIKTPFESNTFVGTALVDMYCKCGSIDDAQRAFIR…	69.449	0	CAN59994.1	hypothetical protein VITISV_012660, partial [Vitis vinifera]	33.33	2e-128	sp|Q9SIT7|PP151_ARATH	Pentatricopeptide repeat-containing protein At2g13600 OS=Arabidopsis thaliana GN=PCMP-E76 PE=3 SV=1	At2g13600	394	5e-128	KOG4197	FOG: PPR repeat	R	General function prediction only	K15271|1|8e-103|348|egr:104423905|ATP-dependent DNA helicase HFM1/MER3 [EC:3.6.4.12]	GO:0009451//RNA modification	GO:0004519//endonuclease activity;GO:0003723//RNA binding	GO:0043231//intracellular membrane-bounded organelle
3632	PSR84507.1	SPX domain-containing protein [Actinidia chinensis var. chinensis]	32617	0.032	1	1	PSS13851.1	0.8	0.743|0.763|0.879|0.842|0.867|0.987|0.663|0.667|0.767	0.106	9	0.0007048	PSR84507.1	MKFGKSLRNQIEETLPEWRDKFLSYKELKKRLKLIEPRGGNRASKRPRVSGDCTDGGGGGGEEMTKDENDFMELLEAELEKFNAFFVEKEEDYIIRLKDLQDRVAKAKDLSEEMIRIRKEIVDFHGEMVLLENYSALNYTGLVKILKKYDKRTGALLRSPFIQKVLQQPFFTTDLLYKLVKQCEALLDRLFPIDEPRSSTDPSDGDDPSTSNTTKNDDLLGGPKGLAEIEYMESLYMKSTITALRVLKEIRSKSSTVSAFSLPPLQISGLEDTWNKIPVLEQVAK	80.137	1e-158	XP_021658844.1	SPX domain-containing protein 1-like [Hevea brasiliensis]	69.18	6e-125	sp|O48781|SPX2_ARATH	SPX domain-containing protein 2 OS=Arabidopsis thaliana GN=SPX2 PE=2 SV=1	At2g26660	357	1e-124	KOG1161	Protein involved in vacuolar polyphosphate accumulation, contains SPX domain	P	Inorganic ion transport and metabolism	K18696|1|3e-09|62.8|bpg:Bathy01g03620|glycerophosphodiester phosphodiesterase [EC:3.1.4.46]!K14430|2|3e-07|56.2|gsl:Gasu_35240|phosphate transporter	GO:0016036//cellular response to phosphate starvation		GO:0005783//endoplasmic reticulum
3645	PSR86457.1	Protein FAM210B like [Actinidia chinensis var. chinensis]	21526.3	0.059	1	1	PSR89835.1	0.76	0.975|0.750|0.895|0.960|0.746|0.861|0.625|0.464|0.553	0.182	9	0.007719	PSR86457.1	MAIGLLAPSHNLGDKILFANTCLTSGKLGKYASSHLSSKSKLNGWRVRAIKEKTEEMKFPTPLNSSSSSSAEEITQKYGLEAGLWKIFSSKEEGKEESEGNKSKGNQAKELLAKYGGAYLATSITLSLISFSLCYALISAGIDVQALLQKVGISTNEAGEKVGTFALAYAAHKAASPIRFPPTVALTPVVASWIGKKADKGE	73.563	4e-82	XP_019448864.1	PREDICTED: uncharacterized protein LOC109351741 [Lupinus angustifolius]	-	-	-	-	At2g27290	191	9e-62	KOG4526	Predicted membrane protein	S	Function unknown	K20815|1|4e-08|53.9|cvr:CHLNCDRAFT_24886|N-terminal acetyltransferase 2			GO:0016021//integral component of membrane
3647	PSR90171.1	RNA-binding protein like [Actinidia chinensis var. chinensis]	21923.9	0.254	3	4	-	0.8	0.957|0.793|0.874|0.966|0.777|0.901|0.659|0.635|0.610	0.138	9	0.003591	PSR90171.1	MANAEVEAVDFEPEDDDLMDEDLDGAASPTRAPLPKIKSAITGGSTISAPKKTKGRGFREESDAADRNARLAGRFDSIGSDGGPGPERSIEGWIILVTGVHEEAQEDDLQNSFGEFGEIKNLHLNLDRRTGFVKGYALIEYENFEEAHKSISEMDGAELLTQTINVDWAFSKGPFRKRNMRRRSPRGQRSRSPRRRF	79.695	2e-111	NP_001274809.1	uncharacterized protein LOC102577678 [Solanum tuberosum]	65.79	2e-81	sp|F4I9J7|Y14_ARATH	RNA-binding protein Y14 OS=Arabidopsis thaliana GN=Y14 PE=1 SV=1	At1g51510	241	2e-81	KOG0130	RNA-binding protein RBM8/Tsunagi (RRM superfamily)	R	General function prediction only	K12876|1|2e-114|327|oeu:111369956|RNA-binding protein 8A	GO:0006396//RNA processing	GO:0003729//mRNA binding	GO:0005737//cytoplasm;GO:0005634//nucleus
3700	PSS17665.1	inactive leucine-rich repeat receptor-like protein kinase [Actinidia chinensis var. chinensis]	86990.3	0.024	1	1	-	0.81	1.001|1.062|0.787|0.936|0.983|0.720|0.654|0.671|0.497	0.192	9	0.02316	PSS17665.1	MDKLPQNPFQFFVLLLFFASGFASGQSGDNVSITLADLQSLKALKSEFIDSKGFLKSWNDTGSRACSGDWVGIKCVKGQVIAVQLPWKGLGGKISEKIGQLQGLRRLSLHDNGLTGPVPNSLASLPNLRGVYLFNNRLSGSIPASIGRCPVLQTLDLSKNQLTGTIFPSIANSTRLYRLNLSFNLISGSIPVSLSLSPSLTFLALQYNNLSGSVPDSWGSGTENKTYQLQILNLDHNLISGKIPTSLSKLGSLEMLSLSHNRFNGTIPNELGALSKLQMLDLSDNVINGKIPESIDKLQNLSVLNLKNNHFNGQIPETLGDISTIAQLDLSNNNFSGEIPNSLSKLPQLTSFNVSLNNLSGLVPLLLSKKFNSSSFVGNRQLCGYSPSFPCPSPPPHQI…	69.597	0	XP_006360828.1	PREDICTED: probably inactive leucine-rich repeat receptor-like protein kinase IMK2 [Solanum tuberosum]	61.6	0	sp|Q9SCT4|IMK2_ARATH	Probably inactive leucine-rich repeat receptor-like protein kinase IMK2 OS=Arabidopsis thaliana GN=IMK2 PE=1 SV=1	At5g41680	210	5e-61	KOG1187	Serine/threonine protein kinase	T	Signal transduction mechanisms	K04733|1|5e-108|349|han:110886102|interleukin-1 receptor-associated kinase 4 [EC:2.7.11.1]		GO:0005524//ATP binding;GO:0004672//protein kinase activity	GO:0016021//integral component of membrane
3721	PSS21025.1	Temperature-induced lipocalin-1 like [Actinidia chinensis var. chinensis]	21587	0.259	5	14	-	0.82	0.694|0.828|0.965|0.749|0.931|1.020|0.630|0.732|0.846	0.132	9	0.004805	PSS21025.1	MAKKEMEVVKGLDLERYMGRWYEIASFPSRFQPKSGINTRATYTLREDGIVNVLNETWTDDKRGFIEGTAYKADPKSDEAKLKVKFYVPPFLPIIPVVGDYWVLFIDDDYQYALIGQPSRKYLWILCRQNHIAEETYKQLVQRAKDEGYDVSKLHQTTHTDPPPEGEDGPKDTKGIWWFKSIFGK	85.946	2e-115	XP_018850349.1	PREDICTED: temperature-induced lipocalin-1 [Juglans regia]	76.5	2e-107	sp|Q9FGT8|TIL_ARATH	Temperature-induced lipocalin-1 OS=Arabidopsis thaliana GN=TIL PE=1 SV=1	At5g58070	305	3e-107	KOG4824	Apolipoprotein D/Lipocalin	M	Cell wall/membrane/envelope biogenesis	K03098|1|3e-116|331|jre:109012906|apolipoprotein D and lipocalin family protein		GO:0005215//transporter activity	-
3725	PSR91057.1	Phosphoglucomutase [Actinidia chinensis var. chinensis]	63651.1	0.473	14	27	-	0.78	0.737|0.965|0.734|0.738|0.985|0.701|0.668|0.856|0.624	0.128	9	0.001136	PSR91057.1	MVMFKVARVDTTPFDGQKPGTSGLRKKVKVFMQPNYLENFVQSTFNALSAEKVRGATLVVSGDGRFYSKEAIQIIIKMSAANGVRRVWVGQNGLLSTPAVSAVIRERVGRDGSKASGSFILTASHNPGGPHEDFGIKYNMENGGPAPEGITDKIFENTKTIKEYFIAQDLPDVDISAVGITSFSGPEGKFDVDVFDSASDYVKLMKSIFDFTSIQKLISSPKFTFCYDALHGVAGAYAKRIFVEELGAQESSLLNCVPKEDFGGGHPDPNLTYAKELVARMGLGKSSSQGEPPEFGAAADGDADRNMILGKRFFVTPSDSVAIIAANAVQAIPYFSGGLKGVARSMPTSAALDVVAKHLNLKFFEVPTGWKFFGNLMDAGLCSVCGEESFGTGSDHIRE…	89.897	0	XP_018837851.1	PREDICTED: phosphoglucomutase, cytoplasmic [Juglans regia]	88.01	0	sp|Q9ZSQ4|PGMC_POPTN	Phosphoglucomutase, cytoplasmic OS=Populus tremula GN=PGM1 PE=2 SV=1	At1g70730	1049	0	KOG0625	Phosphoglucomutase	G	Carbohydrate transport and metabolism	K01835|1|0.0|1096|jre:109003961|phosphoglucomutase [EC:5.4.2.2]	GO:0005975//carbohydrate metabolic process	GO:0000287//magnesium ion binding;GO:0016868//intramolecular transferase activity, phosphotransferases	-
3726	PSS11980.1	Disease resistance RPP13-like protein [Actinidia chinensis var. chinensis]	153121	0.012	1	1	PSS12025.1;PSS11982.1;PSS11983.1	0.83	0.880|0.878|0.876|0.983|0.970|0.966|0.641|0.622|0.619	0.155	9	0.01395	PSS11980.1	MSKKISTLGLHVVNISGTPIQDRERPPTTSATYEPCIHGRDKSKREIIDLLRMEESDLGIIPITGMGGIGKTTVAQVVYNDEVVKKHFDLKAWICVSDNFDIMRITKEIAGYVHGDSSGSKTLDQLQDQLKSALDGKKFLIVLDDVWDVKYNEWNILKSPFRAGAPGCKVIVTTRDTEVASMMGTVQYHALECLPYEECWSIFAQHAFQNISTATHRNLESIGQEIVKKCGGLPLAARTLGGLLQCKPRESEWKNVLNSKIWELKGSDILPALRLSYHHLPPHLKQCFAYCAILPKDYEFEEEELVLLWMAEGFICQQEGGKRMEDLGIEYFRELLSRSFFQPSRMTEGSKFVMHDLINDLAQFFARQTSFRLEDNKEKYKNLKKARHSSYIQCNLDGI…	44.177	0	XP_021663652.1	putative disease resistance RPP13-like protein 1 [Hevea brasiliensis]	40.28	0	sp|Q9LRR4|R13L1_ARATH	Putative disease resistance RPP13-like protein 1 OS=Arabidopsis thaliana GN=RPPL1 PE=3 SV=1	At3g14470	579	0	KOG4658	Apoptotic ATPase	T	Signal transduction mechanisms	K15078|1|0.0|591|hbr:110659116|structure-specific endonuclease subunit SLX1 [EC:3.6.1.-]	GO:0006952//defense response;GO:0007165//signal transduction	GO:0043531//ADP binding	GO:0005886//plasma membrane
3727	PSR86598.1	Aquaporin PIP2-7 like [Actinidia chinensis var. chinensis]	30843	0.049	1	1	-	0.72	0.419|1.262|0.512|0.580|1.268|0.706|0.373|0.942|0.382	0.359	9	0.02596	PSR86598.1	MTKDVEVAEQTGEFSAKDYHDPPPAPLVDAEELTQWSFYRALIAEFIATLLFLYITVLTVIGYKSQTDPTKNADECGGVGILGIAWAFGGMIFILVYCTAGISGGHINPAVTFGLFLARKVSLIRAVMYMVAQSLGAICGVGLVKAFQKAHYNRYGGGANEVAPGYNKGTALGAEIIGTFVLVYTVFSATDPKRNARDSHVPVLAPLPIGFAVFMVHLATIPITGTGINPARSFGAAVIYNQDKAWDDQWIFWVGPFIGAAIAAFYHQYILRAAAIKALGSFRSNA	92.657	0	XP_012064821.1	aquaporin PIP2-4 [Jatropha curcas]	82.58	1e-178	sp|Q9ATM4|PIP27_MAIZE	Aquaporin PIP2-7 OS=Zea mays GN=PIP2-7 PE=2 SV=1	At2g37170	478	3e-172	KOG0223	Aquaporin (major intrinsic protein family)	G	Carbohydrate transport and metabolism	K09872|1|0.0|544|jcu:105628093|aquaporin PIP		GO:0005215//transporter activity	GO:0016021//integral component of membrane
3734	PSS02056.1	ATPase [Actinidia chinensis var. chinensis]	10420.4	0.118	1	1	-	0.82	0.767|0.862|0.868|0.663|0.775|0.749|0.811|0.933|0.937	0.09	9	0.00057	PSS02056.1	MEGLQKAYRDLSENPKPSSSFPSFSSSTERGAATLSSDQSRVIVARSARQVVSLSTCSKLCTICFVTGVVVGFSLKRRVRRWASMLLKRIKDD	55.882	1e-29	GAV70957.1	hypothetical protein CFOL_v3_14454 [Cephalotus follicularis]	-	-	-	-	-	-	-	-	-	-	-	-			GO:0016021//integral component of membrane
3743	PSS13401.1	Notch 1 intracellular domain like protein isoform 2 [Actinidia chinensis var. chinensis]	25962.5	0.241	1	1	-	0.78	0.906|0.933|0.753|0.856|0.879|0.690|0.723|0.717|0.578	0.118	9	0.001152	PSS13401.1	MSILGNHPCTWSLGGWKHSFKGRFSELPCFEYYNPDFYFKESFLLPCQYIAIGCKRSTRMCQPIFSSIMDNGADPDDSSEGIDNDGSSEGESEDVNCEMLRENLERIVGKDDSAFSGIDLATLIRKKYGKSYDVQLIKKDFMGRNLLALNVMWKYMEQKSFPLTEEEYLLRLDDVANTLKCWGAVSHIRNSLANSKERPRIGKAVSIFIDMDESGGRANEWIYK	66.816	6e-102	GAV69828.1	DUF3067 domain-containing protein [Cephalotus follicularis]	-	-	-	-	-	-	-	-	-	-	-	-	-	-	-
3752	PSS33600.1	KH domain-containing protein [Actinidia chinensis var. chinensis]	74300.6	0.126	2	2	-	0.74	0.733|0.837|0.855|0.723|0.831|0.825|0.579|0.636|0.645	0.103	9	0.0001889	PSS33600.1	MEANRRSFFKKRPGPQLKQKGGNKKGKWHNYNHEQSFGDSYSSDTVYRILCHSKKIGSVIGKGGSIVKALREETQSKITVADSVAGSDERVIIIYSPSSKIHENHKSNEDQGAATETEDDPMEPHCAAQDALLKVHDRIVEEDLVGGKEDEYDENVVTTRLLVPNNTVGCLLGRKGDVIQRLRSDTGANIRVLPSDHLPTCAMSTDELVQISGKPAVAKRALYEVSTLLHQNPRKDKPPLSFPMPYGGQGFHPPGPPMANMPRPGNPMWSQRHVNSCDMPPPWMGEYGNQPSGFGPGGFDGGPPMHGDEAPSEFSMKILCSAGKIGGVIGKGGFNVKQLQQETGASIHVGDASAEFEERVIRVSSFEVLWNPRSQTIDAILQLQNKTSELSEKGIITTR…	71.079	0	XP_003633728.1	PREDICTED: KH domain-containing protein At4g18375 [Vitis vinifera]	29.44	5e-63	sp|P58223|Y4837_ARATH	KH domain-containing protein At4g18375 OS=Arabidopsis thaliana GN=At4g18375 PE=2 SV=1	At5g15270	304	1e-94	KOG2190	PolyC-binding proteins alphaCP-1 and related KH domain proteins	AR	RNA processing and modification;General function prediction only	K21444|1|0.0|872|vvi:100253195|poly(rC)-binding protein 3/4		GO:0003723//RNA binding	-
3753	PSS21576.1	Transketolase [Actinidia chinensis var. chinensis]	80688.7	0.529	2	11	-	0.82	1.001|0.833|0.780|0.992|0.827|0.753|0.869|0.707|0.660	0.117	9	0.002627	PSS21576.1	MASSSSLNLSQATLSRSAAQQHHRGSNRPASLTTSSLPTFPGLKSSSRAASTRRRSVRASASTSRRSVRASAAVETLETTATELIDKSVNTIRFLAIDAVEKANSGHPGLPMGCAPMGHVLYDEIMRYNPKNPYWFNRDRFVLSAGHGCMLQYALLHLAGYDSVQEEDLKQFRQWGSKTPGHPENFETPGVEVTTGPLGQGIANAVGLALAEKHLAARFNKPDSEIVDHYTYAILGDGCQMEGISNEACSIAGHWGLGKLIAFYDDNHISIDGDTEIAFTESVDTRFEGLGWHVIWVKNGNTGYDEIRAAIKEAKAVKDKPTLIKVTTTIGYGSPNKANSYSVHGSALGAKEVDATRQNLGWPYEPFHVPEDVKKHWSRHVPAGAALEAEWNAKFAEYE…	88.694	0	XP_011034130.1	PREDICTED: transketolase, chloroplastic [Populus euphratica]	85.48	0	sp|Q43848|TKTC_SOLTU	Transketolase, chloroplastic OS=Solanum tuberosum PE=2 SV=1	At2g45290	1306	0	KOG0523	Transketolase	G	Carbohydrate transport and metabolism	K00615|1|0.0|1365|rcu:8270608|transketolase [EC:2.2.1.1]	GO:0008152//metabolic process	GO:0004802//transketolase activity	-
3762	PSS14686.1	U1 small nuclear ribonucleoprotein like [Actinidia chinensis var. chinensis]	27332.8	0.053	1	1	PSR94752.1	0.82	0.968|0.841|0.891|0.779|0.714|0.714|0.880|0.780|0.826	0.084	9	0.0003566	PSS14686.1	MAEITTGGDVPSNMTIYINNLNEKTKLEELKKSLYAVFSQFGKILEVLAFKTLKHKGQAWVVFEDVSSANNALRQMQGFPFYDKPMRIQYAKTKSDIIAKADGTFVPRERRKRHEERGRKKKEQHDANQTGMGLNPAYAGAYGAATLSQIPYMGGAKSAVPEGPAPPNNILFVQNLPHQANQMMLQMLFCQYQGFKEVRMVEAKPGIAFVEYENEMQSSVAMQGLQGFKMSPENPMLITYAKK	84.016	3e-151	XP_011652939.1	PREDICTED: U1 small nuclear ribonucleoprotein A [Cucumis sativus]	72.61	7e-125	sp|Q39244|RU1A_ARATH	U1 small nuclear ribonucleoprotein A OS=Arabidopsis thaliana GN=U1A PE=1 SV=1	At2g47580	354	1e-124	KOG4206	Spliceosomal protein snRNP-U1A/U2B	A	RNA processing and modification	K11091|1|6e-152|426|csv:101205303|U1 small nuclear ribonucleoprotein A		GO:0003723//RNA binding	GO:0019013//viral nucleocapsid;GO:0030529//intracellular ribonucleoprotein complex
3768	PSS33495.1	Cytochrome P450 94A1 like [Actinidia chinensis var. chinensis]	57966.5	0.09	4	5	-	0.74	0.726|0.858|0.671|0.707|0.851|0.636|0.752|0.827|0.674	0.083	9	3.818e-05	PSS33495.1	MELLSLQTLFFISLLSLFVYFVINPKPTPTTGFKIYPLVGSLPQFLKNRHRFLDWTTQVLRDCPSNTAVFRRPGKVHGIITANPSNVEHMLKANFQNYPKGTRFISLLQDFLGRGIFNSDGDLWKVQRKTASYEFNTKSLRNFVMETARTEIQTRLVPILHKSAQTNRVLDIQDVLERFAFDNICKVAFNVDPACLGGDGGEFMEAFEAAATLSSGRFMYALPFLYKIKKYFNMGSEKKLMKSIATVHEFADQIIKSRLEEGGERKDEDLLSRFIGTGEISAELLRDIVISFILAGRDTTSSALTWFFWLLSSRPDITEKILDELQIIRARNSKGVGDIYSFDELREMHYLHAAISEAMRLYPPVPVDTKNCREEDVLPDGTFVGKDWFVTYHTYAMGR…	74.308	0	XP_011070085.1	cytochrome P450 94A1 [Sesamum indicum]	48.73	4e-158	sp|O81117|C94A1_VICSA	Cytochrome P450 94A1 OS=Vicia sativa GN=CYP94A1 PE=2 SV=2	At3g56630	629	0	KOG0157	Cytochrome P450 CYP4/CYP19/CYP26 subfamilies	QI	Secondary metabolites biosynthesis, transport and catabolism;Lipid transport and metabolism	K20665|1|2e-156|458|cann:107866012|jasmonoyl-L-amino acid 12-hydroxylase [EC:1.14.14.48]!K20769|2|4e-156|457|mdm:103428002|fatty acid omega-hydroxylase [EC:1.14.-.-]!K13407|3|1e-155|456|pop:18099663|fatty acid omega-hydroxylase [EC:1.14.-.-]		GO:0016705//oxidoreductase activity, acting on paired donors, with incorporation or reduction of molecular oxygen;GO:0004497//monooxygenase activity;GO:0005506//iron ion binding;GO:0020037//heme binding	GO:0016021//integral component of membrane
3774	PSS04729.1	Oxygen-evolving enhancer protein like [Actinidia chinensis var. chinensis]	23374.7	0.479	5	49	-	0.82	1.074|0.780|0.849|0.863|0.642|0.650|1.014|0.716|0.835	0.149	9	0.008448	PSS04729.1	MVQAMASMSGLVGGSTRLSPASGSIRAAVARPGLIVRAQQGPVELETTRRAVLGLVATGLASGSFVQAVLAEAKSIKVGPPPPPSGGLPGTLNSDEARDLELPLKERFFIQPLPPAEAAVRAKESAKDIVNVKELIDKKAWPYVQNDLRLKASYLRYDLNTVISAKPKEQKKPLKDLTGKLFQDISNLDHAAKIKSTPEAEKYYAVAVSTLKDVLEKIG	73.707	1e-109	XP_009366538.1	PREDICTED: oxygen-evolving enhancer protein 3-2, chloroplastic [Pyrus x bretschneideri]	63.91	1e-98	sp|Q41932|PSBQ2_ARATH	Oxygen-evolving enhancer protein 3-2, chloroplastic OS=Arabidopsis thaliana GN=PSBQ2 PE=1 SV=2	-	-	-	-	-	-	-	K08901|1|2e-110|319|pxb:103956260|photosystem II oxygen-evolving enhancer protein 3	GO:0015979//photosynthesis	GO:0005509//calcium ion binding	GO:0019898//extrinsic component of membrane;GO:0009654//photosystem II oxygen evolving complex
3781	PSS05821.1	Protein DETOXIFICATION like [Actinidia chinensis var. chinensis]	55167.4	0.034	1	2	-	0.81	0.785|0.773|0.906|0.756|0.750|0.850|0.789|0.754|0.885	0.06	9	1.73e-05	PSS05821.1	MGSASEEYQSLLLRLDSHGHIPELSSNAVEEFLSHRPVAMRWYLRLVGWESKLLWLLSGSSIVVSIFNYMLSFVTQMFTGQLGALELAGASIASVGIQGLAYGIMLGMASAVQTVCGQAYGAKKYAAMGIICQRAIVLHLGAAVLLTFLYWFSGPVLKAIGQTDSIADQGEIFARGLIPQLYAFAISCPMQRFLQAQNIVNPLAYISVAVFLLHILLTWLVVDVLEYGLIGAALTLSLSWWILVIIQGLYIIFSPLCRETWTGLSLKALKGMWPYFKLTVASAVMLCLEIWYFQGLVLISGLLPNPTISLDSISISMNYLNWDMQFMLGLAAAASVRVSNELGAGHPMVAKFSVLVVNGTSILISIFFSAIVLIFKVELSKLFTSDSEVIAAVSDLTPL…	84.783	0	XP_018857059.1	PREDICTED: protein DETOXIFICATION 41-like [Juglans regia]	73.15	0	sp|Q9LYT3|DTX41_ARATH	Protein DETOXIFICATION 41 OS=Arabidopsis thaliana GN=DTX41 PE=2 SV=1	At3g59030	749	0	KOG1347	Uncharacterized membrane protein, predicted efflux pump	R	General function prediction only	K03327|1|0.0|860|jre:109019248|multidrug resistance protein, MATE family		GO:0015297//antiporter activity;GO:0015238//drug transmembrane transporter activity	GO:0016021//integral component of membrane
3810	PSS08322.1	Uridine-cytidine kinase [Actinidia chinensis var. chinensis]	36363.8	0.155	1	1	-	0.8	0.793|0.728|0.821|0.801|0.750|0.815|0.859|0.780|0.879	0.048	9	3.935e-06	PSS08322.1	MALGYTIASILKRSSHVFFDDRVCVKTDWLEQLNRKYVQVQGRDRMYVKFIAEQLGLDGSYVPRTYIEQIQLEKLVNDVMALPADLKTKLSIDDDLVSSPKEALSRASADRRMKYLNRGISHSFSTRRDKNLSKLTQLAVNNRRYDGRTPDSPASLTNQGIITQLSEQISTLNERMDEFKSRIEELNSKYSTRKVSASQQNLALQAEACNDCAPTSLFMAGLNNGTLTGSMLPHSASSSQLAKESPLMEEVLLIARGQRQVMHQLDNLSNLLHEYQREKSREGRPDATSRTREVELIGVSLILTLAIGGLGIFLFRTLSSQK	78.882	0	XP_002269501.1	PREDICTED: uridine-cytidine kinase C isoform X1 [Vitis vinifera]	-	-	-	-	At1g73980	390	4e-132	KOG4203	Armadillo/beta-Catenin/plakoglobin	TZ	Signal transduction mechanisms;Cytoskeleton	K00876|1|0.0|533|vvi:100243884|uridine kinase [EC:2.7.1.48]	GO:0043097//pyrimidine nucleoside salvage;GO:0006206//pyrimidine nucleobase metabolic process	GO:0016301//kinase activity;GO:0004849//uridine kinase activity;GO:0005524//ATP binding	GO:0005829//cytosol;GO:0016021//integral component of membrane
3817	PSS19656.1	PWWP domain-containing protein [Actinidia chinensis var. chinensis]	126595	0.02	1	1	PSS19653.1	0.81	0.844|0.811|0.831|0.830|0.803|0.800|0.813|0.766|0.783	0.025	9	2.876e-08	PSS19656.1	MSNNDFELDPKSELIAGETQSKSRVSGDLGGVSFANNGDGDKGPSLNLISSQENRLSLGVGGVDGSDKDKPPGYEGFGVSEELENRALGVDVDGRVMDGDDEKTSSEDDWKGVDEKLKSESSDIRNDGVGISSRASDRTFDVRNEGDIHSESRLLVKGHVEMGKPSASMFDEFGMGETVGAWLSTSVGYGYEIGDMIWGKVKSHPWWPGHIYNEALASPSVRRTKRAGHVLVAFFGDSSYGWFEPAELVPFDDNFAEKSMQTNLRIFVNAVEEAVDEVSRRCGLGLACRCRNPYNFRPTNVQGYFAVDVDNYELGGVYSVRQIRKARDSFQPIDTVAFVKQLALMPRGDWSIDFISNKATVLAYRKAVFEEFDVTYAQAFGQEPVRPTRESILAAAQPV…	44.605	0	XP_006433394.1	hypothetical protein CICLE_v10000070mg [Citrus clementina]	-	-	-	-	-	-	-	-	-	-	-	K17398|1|0.0|828|dzi:111283359|DNA (cytosine-5)-methyltransferase 3A [EC:2.1.1.37]		GO:0003676//nucleic acid binding	-
3832	PSR95852.1	U-box domain-containing protein [Actinidia chinensis var. chinensis]	56058.2	0.029	1	1	-	0.75	0.849|0.718|0.815|0.807|0.701|0.761|0.772|0.642|0.727	0.065	9	9.526e-06	PSR95852.1	MGGNGKNRWKISIYRSSSSKKKLEKKEPPTEFICPISGSLMSDPVVVSSGQTFERTSVQVCRALGFSPPLPDGSIPDFTVVIPNSALKSTILKWCDASGADRPTAPDYGSVEDIVRTVVGDGAPKIRVSERELLRGVTEKPAVLFFHAATELNHRVNHFDSASSEESVIANVPATPLLPFATRPMCYSEESSSSIASDEGINPSFSSEDEEFVVKLKSSDVFEQEQGVIALRKTTRSNEEARVSLCTSRLLSSLRPLLISRYAVVQTNAVAAVVNLSLEKANKVKIVRSGIAPPLIDVLKGGAAESQEHAAGAIFSLALEDDNKTAMGVLGALQPLLHALRSESDRTRHDAAMALYHLSLVQSNRVKLVKLGAVSTLLSLLRGGELAGRVMLVLCNLAS…	65.306	0	XP_009588283.1	PREDICTED: U-box domain-containing protein 38 isoform X2 [Nicotiana tomentosiformis]	55.7	0	sp|Q9FJP6|PUB38_ARATH	U-box domain-containing protein 38 OS=Arabidopsis thaliana GN=PUB38 PE=1 SV=1	At5g67340	153	1e-39	KOG0167	FOG: Armadillo/beta-catenin-like repeats	S	Function unknown	K08332|1|0.0|564|han:110879782|vacuolar protein 8!K22499|2|7e-72|246|mus:103977448|armadillo repeat-containing protein 5		GO:0004842//ubiquitin-protein transferase activity	GO:0005737//cytoplasm;GO:0005634//nucleus
3861	PSS14581.1	Phospholipase [Actinidia chinensis var. chinensis]	56500.4	0.312	12	31	-	0.83	1.152|0.682|0.824|0.907|0.586|0.645|1.198|0.644|0.816	0.222	9	0.03407	PSS14581.1	MAISSTHTVLSCNSYEQKLFRSKNQFSAPLIGPKTQLISTSSDRVKLAARSHTTPRVLSKPTEAVPSETKTDKPRPKPEPDHPPLAETWREFHGENNWEGLLDPMHPPLRAELIRYGEMTQACYDAFDFDPYSKYCGSCKYAPQEFFKRLGMDHYGYDVARYLFATSNINLPNFFKKSRWPQVWSTNANWIGYIAVSNDERSKSLGRRDIIISWRGTVTNLEWVADLMDILTPVSKHIPCPDPTVKAEAGFLDLYTDKKVDCDYCHISAREQIETEVKKIVARYPNEELSISIMGHSLGSALAMLSGFNIVETGLNVTTDGRKIPVCIFSFAGPRVGNIGFKERVEKSGLKVLRIFNIHDVVPKSPGFIFNENMPQMPQFLMKFIEGLPWTYFHIGVKL…	59.92	0	XP_002281907.1	PREDICTED: phospholipase A1-Igamma2, chloroplastic [Vitis vinifera]	62.1	0	sp|Q941F1|PLA15_ARATH	Phospholipase A1-Igamma1, chloroplastic OS=Arabidopsis thaliana GN=At1g06800 PE=1 SV=2	At1g06800	551	0	KOG4569	Predicted lipase	I	Lipid transport and metabolism	K16818|1|5e-84|270|ccav:112526931|phospholipase A1 [EC:3.1.1.32]	GO:0006629//lipid metabolic process	GO:0016787//hydrolase activity	-
3883	PSR88138.1	HMG-Y-related protein like [Actinidia chinensis var. chinensis]	19712.3	0.215	2	4	-	0.72	0.754|0.722|0.860|0.731|0.807|0.830|0.565|0.565|0.659	0.107	9	0.0001832	PSR88138.1	MAAEESTSPLQPPTAPSSLPQYPEMILAAIEALNDKDGSNKSSISKQIEAEYGELPAAHTTLLSHHLNKMKQSGQLVMVKNNYMRPDPNAPPRRGRGRPPKPKTALPPDATMSPPRPRGRPPKPRDPLSSVTTKPSSAGSGRPRGRPPKKAKTISSAPTAAASTGPPRGRGRPPKVKPPAVAPVEC	72.515	1e-65	XP_021594450.1	HMG-Y-related protein B-like [Manihot esculenta]	54.89	6e-55	sp|Q43386|HMGYA_ARATH	HMG-Y-related protein A OS=Arabidopsis thaliana GN=HMGA PE=1 SV=1	-	-	-	-	-	-	-	K11275|1|1e-47|156|ats:109734266|histone H1/5	GO:0006355//regulation of transcription, DNA-templated;GO:0006334//nucleosome assembly	GO:0003677//DNA binding	GO:0005634//nucleus;GO:0000786//nucleosome
3884	PSS21643.1	Serine/threonine-protein kinase kinX [Actinidia chinensis var. chinensis]	71142.7	0.055	2	2	-	0.75	0.640|0.565|0.827|0.768|0.728|0.994|0.702|0.646|0.912	0.138	9	0.001117	PSS21643.1	MASEATVVSDYSTAPEKVEKVNEEVKQIEESLPASKDSGEEKEPKAEELPCQPTPASSEVDTKLEEKQIERSLAAEVKKTDETPVLEVPVEDNSQPEAKPIIVSVEEQPQEKPVIEVVEKLLEAAPEVVEVTVPPVVAEQPVTEPVGKQSEEQPPVEVVEKEAEEQPKIVGTPEPSVEAVEETEKVEVLPIKELETLAAKNVESSEAAPKKEVIPESVTKMEDKPQEQLEAVEVVEKECAAAEPKESVEVEIAKDKETLADKIEETIKEKPVVMDIPQEPSEAAEKVEEECAVIEPKESVKFEIAKEKTDKDEVVATEKAPKQSEAAEKVEDECAVVEPEKVEIADKEISADKIEDSLLKEEQTGKDEVVVTNKAPEQSEAAENVEEVCAEVEPEESVK…	39.884	3e-34	XP_010659767.1	PREDICTED: neurofilament heavy polypeptide [Vitis vinifera]	-	-	-	-	At3g05900	54.3	4e-07	KOG1181	FOG: Low-complexity	S	Function unknown	-	-	-	-
3885	PSS24745.1	2,3-bisphosphoglycerate-dependent phosphoglycerate mutase [Actinidia chinensis var. chinensis]	25359.8	0.053	1	1	-	0.77	1.096|0.986|0.878|0.915|0.823|0.712|0.578|0.499|0.444	0.226	9	0.0206	PSS24745.1	MNYAAVGNVLSSAGVVPRRRCRCRSSPPSRSLVIESVEGQTWDEAKPPSESVARRLILLRHARSSWKDRSLRDHDRPLSRTGQAAAIEVSHKLQQLGWIPDLILSSDAVRTKETLKIMQEQVRGFLEAEVHFISSFYSIAAMDGQTAEHLQHAICKFSKDEILTVMCMGHNRGWEEAASMFSGISIELKTCNAALLEATGKSWEEAFSLAGFGGWKLQGIVTPNSSP	84.5	3e-119	XP_002264671.3	PREDICTED: uncharacterized protein LOC100247110 [Vitis vinifera]	65.4	3e-96	sp|Q94BY1|Y3515_ARATH	Uncharacterized protein At3g52155, chloroplastic OS=Arabidopsis thaliana GN=At3g52155 PE=2 SV=1	At3g52150	268	4e-87	KOG0118	FOG: RRM domain	R	General function prediction only	K13126|1|9e-92|281|aly:ARALYDRAFT_348313|polyadenylate-binding protein	-	-	-
3895	PSR99539.1	Enoyl-CoA hydratase 2, peroxisomal like [Actinidia chinensis var. chinensis]	34480.5	0.088	3	6	PSS31211.1	0.83	0.897|0.795|0.871|0.946|0.839|0.897|0.791|0.686|0.748	0.082	9	0.0004925	PSR99539.1	MADAPVIDPELIVSHQFPEKTYSYTERDAALYALGIGACARDALDKNELKYVYHQDGQQSIQVLPTLAALFSLGYTSELAHLPGLQYDPRLLLHGQQYIEIYKPFPSSGCIQNKACISGLHDKGKATILEIEITSYEESGELLCMNRMSVYLRGTGGFSKSSHPYSYSKNPASKNLSAKIPKSQPFAVYEECTQPSQALLYRLSGDYNPLHSDPMIAEIAGFSRPILHGLCTLGFAVRAIIRCVCSGEPNMIKTISGRFLLHVYPGETLITEMWLEGSRVIFQVKVKERNRAVLSGFTDLNRLTSSL	80.795	0	XP_016455706.1	PREDICTED: enoyl-CoA hydratase 2, peroxisomal-like [Nicotiana tabacum]	65.56	2e-152	sp|Q8VYI3|ECH2_ARATH	Enoyl-CoA hydratase 2, peroxisomal OS=Arabidopsis thaliana GN=ECH2 PE=1 SV=1	At1g76150	399	4e-140	KOG1206	Peroxisomal multifunctional beta-oxidation protein and related enzymes	I	Lipid transport and metabolism	K19658|1|0.0|517|nta:107779741|peroxisomal enoyl-CoA hydratase 2 [EC:4.2.1.119]	-	-	-
3899	PSS13862.1	Methyl-CpG-binding domain-containing protein [Actinidia chinensis var. chinensis]	21885.1	0.31	5	7	-	0.62	0.518|0.641|0.530|0.568|0.720|0.567|0.652|0.773|0.644	0.086	9	5.58e-06	PSS13862.1	MESSVEKVTLEVLSLELPAPSGWKKKFMPRKGGTPKKNEIVFIAPTGEEITNRRHLEQYLKSHPGGPAISEFDWGTGETPRRSVRISEKAKATPPPETESPKKRSRKTSALKKDDKEKETGPKETEAVKEVHMQDGDKIEKDNAAEEIEKDAVKENQDQNKDETLGADGKAKAAKAGEAMVEGEANKNGSHGSEADDSKP	64.921	3e-74	XP_021592098.1	methyl-CpG-binding domain-containing protein 11-like isoform X2 [Manihot esculenta]	68.57	8e-47	sp|Q9LW00|MBD11_ARATH	Methyl-CpG-binding domain-containing protein 11 OS=Arabidopsis thaliana GN=MBD11 PE=1 SV=1	-	-	-	-	-	-	-	K02213|1|9e-17|82.0|ppp:112294962|cell division control protein 6		GO:0003677//DNA binding	GO:0005634//nucleus
3901	PSS36078.1	Endonuclease [Actinidia chinensis var. chinensis]	103973	0.036	1	1	-	0.68	0.712|0.545|0.791|0.574|0.701|0.733|0.659|0.588|0.852	0.103	9	5.447e-05	PSS36078.1	MADGTRSQDFKKLEDFVRALKENQERAAREYEEIKNSLKGMGEIKEILSAVTLKYDQMAAYVFRKQPQEASSGELDTRLRAGSSQPQLMTGFSTREQEDSEQEVLQDEGNDEVLEQEGENSSPKVEKLLSKFEAVFQEPKGLPPLRTHDHHILLKPGEEPPNIRPYRYPYFQKTEIENQVKSMLQSGVIQPSVSPFFAPILLVKKKDATWRMYVDYRALNKVTIKDKFPIPAIDELLDELCGASYFSKLDLRAGYHQIRVHPPDISKTAFRTHEGHYEFLVMPFGLTNAPSTFQSLINEVFKEQLRDFTLVFFDDILVYSKTWEAHLFHLEKTLQLLLKHQLFTKKSKCVFAKQEVEYLGHLVSNRGVSAEAKKIETMLSWPIPRNLKQLRGFLGLTGY…	46.163	0	KFK41015.1	hypothetical protein AALP_AA2G074100 [Arabis alpina]	50.77	2e-40	sp|P92523|M860_ARATH	Uncharacterized mitochondrial protein AtMg00860 OS=Arabidopsis thaliana GN=AtMg00860 PE=4 SV=1	At2g05610	684	0	KOG0017	FOG: Transposon-encoded proteins with TYA, reverse transcriptase, integrase domains in various combinations	R	General function prediction only	K19525|1|5e-78|282|dct:110098611|vacuolar protein sorting-associated protein 13A/C!K00102|2|9e-45|179|cann:107856235|D-lactate dehydrogenase (cytochrome) [EC:1.1.2.4]!K04125|3|2e-42|168|boe:106319842|gibberellin 2beta-dioxygenase [EC:1.14.11.13]!K01303|4|1e-41|170|fve:101311565|acylaminoacyl-peptidase [EC:3.4.19.1]!K02469|5|5e-38|158|lang:109359716|DNA gyrase subunit A [EC:5.99.1.3]	-	-	-
3956	PSS21797.1	Alanine--tRNA ligase [Actinidia chinensis var. chinensis]	111170	0.142	13	13	-	0.82	0.870|0.912|0.822|0.903|0.888|0.784|0.792|0.751|0.667	0.081	9	0.000358	PSS21797.1	MEVLKPQLCLHRSNCAHSMVPFLSSRPTSRFRPRFQYFSPGCRDDSGLIIQKLALVRPTSFSSKHSNMKGTREVNVTLRSTSASIRPMTEELVESKSKDLPTSGDSIRQRFLDFYASRGHKVLPSASLVPDDPTVLLTIAGMLQFKPIFLGKVHRQVPCATTSQRCIRTNDIENVGRTSRHHTFFEMLGNFSFGDYFKKEAIKWAWELSTMEFGLPAERLWISVYEDDDEAFAIWHDEIGVPVERIKRMGEEDNFWTSGVTGPCGPCSEIYYDFHPERGHSDVDLGDDTRFIEFYNLVFMQYNRVTDGSLEPLKQKNIDTGLGLERMARILQKVPNNYETDLIFPIIEKASELANVSYALADDSVKMSLKIIGDHLRAIVYLLSDGVVPSNIGRGYVVR…	81.71	0	XP_002278951.1	PREDICTED: alanine--tRNA ligase, chloroplastic/mitochondrial [Vitis vinifera]	76.55	0	sp|B9HQZ6|SYAP_POPTR	Alanine--tRNA ligase, chloroplastic/mitochondrial OS=Populus trichocarpa GN=POPTRDRAFT_821063 PE=3 SV=1	YOR335c	506	2e-163	KOG0188	Alanyl-tRNA synthetase	J	Translation, ribosomal structure and biogenesis	K01872|1|0.0|1673|vvi:100255425|alanyl-tRNA synthetase [EC:6.1.1.7]	GO:0006419//alanyl-tRNA aminoacylation;GO:0006400//tRNA modification	GO:0004813//alanine-tRNA ligase activity;GO:0000049//tRNA binding;GO:0008270//zinc ion binding;GO:0016597//amino acid binding;GO:0005524//ATP binding	GO:0005739//mitochondrion;GO:0009507//chloroplast
3996	PSS15968.1	CWF19-like protein [Actinidia chinensis var. chinensis]	57904.1	0.023	1	1	-	0.81	0.876|0.855|0.977|0.774|0.769|0.849|0.710|0.678|0.775	0.092	9	0.0003757	PSS15968.1	MLSGLKFIPRDQIEKAQDEDLDDSRRERKSSVKKKEKGRGKKKSSRYGSSDEDDLERIAKGSRKKKKWYSSDEYSSYSTENESQSCSDKDEKKGWNRKREKKRYDDGSEDEARDRSKKELRRRKNYSSEDHSLSDSEDEDKDGYTGRKDKHRKGSKRHGRKKRSERGGEVELMGDDLTDDGSGSHPLDNSNNIVRKEMGLEWMLRPKDSLERKPAMTSDQPEEPQAEEMKKENPRELNPYLKNNGTGYPEPADGTKAGRNQLLSSAVVGDGGASWRLKALKRSQEQAAREGRAVKEVVQERWGSLGQLAVSVASRTAAPSRAHLHAINNRKKGLTEEQQKVADDQDEKVTEKNIGRESLQNMSRRHPNMKVPKLRDSLSWGKRKSQIMSSTDSGIISTA…	61.144	2e-167	XP_010650013.1	PREDICTED: CWF19-like protein 2 [Vitis vinifera]	-	-	-	-	At1g56290	291	2e-89	KOG2477	Uncharacterized conserved protein	S	Function unknown	-	-	-	-
4004	PSS15750.1	ABSCISIC ACID-INSENSITIVE 5-like protein [Actinidia chinensis var. chinensis]	22693.5	0.044	1	1	PSS01722.1	0.82	0.873|0.839|0.813|0.887|0.854|0.809|0.800|0.751|0.727	0.053	9	1.52e-05	PSS15750.1	MTLEDFLVKAGVVAESSSSPGIPKKNSNSGSVLGVGDDQITLPSQQAGAQWMHYQQQQQQNMLTVFMPPGHPPVQQALPIVSNPIMDAAAYPETHMNMSPSPLMGTPSDTQTPGRKRVAPGDVIEKTVERRQKRMIKNRESAARSRARKQAYTHELENKVSRLEEENERLKRQKEVEKVLPCVLPPEPKYQLRRTSSAPSSFGV	75.362	1e-88	AGG39691.1	bZIP transcription factor bZIP7 [Camellia sinensis]	57.92	1e-57	sp|Q9LES3|AI5L2_ARATH	ABSCISIC ACID-INSENSITIVE 5-like protein 2 OS=Arabidopsis thaliana GN=DPBF3 PE=1 SV=1	CE24266	53.1	4e-08	KOG3584	cAMP response element binding protein and related transcription factors	K	Transcription	K14432|1|2e-87|264|sind:105155750|ABA responsive element binding factor		GO:0003700//DNA binding transcription factor activity;GO:0003677//DNA binding	GO:0005634//nucleus
4014	PSR93471.1	FAD-dependent urate hydroxylase [Actinidia chinensis var. chinensis]	47275.8	0.231	8	14	-	0.79	0.858|0.837|0.722|0.843|0.830|0.711|0.768|0.840|0.696	0.065	9	2.696e-05	PSR93471.1	MATTSLLLLLSPLSSSPHTQLRSQIRTRSIVRAQTGTRNEDIVIIGAGIAGLATAVSLHRLGVGSVVVEQGDLLRTGGTSLTLFKNGWRVLDAIGVGHHLRPQFLEIQGMTVKSEDGRELRSFRFKDEDQSQEVRAVERRILLETLANQLPPDTISYSSKLAKIEKSESSETLLELADGTKISAKIVIGCDGIRSPVAKWMGHSEPNYVGHCAFRGLGVYPDGQPYEPRVNYIYGRGVRAGFVPVSPTKVYWFICFNSSSPGPKIIDPSELKKQAIELVRNWPSELLKIIDHTPDDTIIRSSLVDRWLWPAVSPPASAGKVVLVGDAWHPMTPNLGQGACCALEDAVVLARKLAGAVKTGSTTVEDALKSYGDERWPRIFPLTIRANVVGSLLQWDNAA…	78.759	0	XP_002265622.4	PREDICTED: uncharacterized protein LOC100253528 [Vitis vinifera]	35.97	3e-75	sp|Q9FLC2|MO3_ARATH	Monooxygenase 3 OS=Arabidopsis thaliana GN=MO3 PE=2 SV=1	At2g35660	571	0	KOG2614	Kynurenine 3-monooxygenase and related flavoprotein monooxygenases	CR	Energy production and conversion;General function prediction only	K09838|1|1e-26|115|gmx:100778602|zeaxanthin epoxidase [EC:1.14.15.21]		GO:0071949//FAD binding	-
4021	PSS07507.1	Methyl-CpG-binding domain-containing protein [Actinidia chinensis var. chinensis]	34777.1	0.15	2	4	-	0.8	1.029|0.876|1.258|0.708|0.628|0.856|0.608|0.497|0.725	0.235	9	0.02495	PSS07507.1	MASSVDKETQSGPNNDVVSVELPAPSAWKKLFMPKKGGTPRKNEIVFIAPTGEEINSRKQLEQYLKSHPGNPALSEFDWGTGDTPRRSARISEKVKATPPSSESESPRKRGRKSLGSKDRKEKETRAEETEGKKDVEMHDVVSTEKAAGEEKGEGDSEKTQEKGLEEVPGKDAIIQHDPQETKNGEMEEPKEDKQTVEAGGNEVTQNDKNVDNKEVFGKAEQTESEAAKVNGASDEKDELENVTVPTSIGLVQEKPAEIAHSSGNIEEKNEVQVSDGKCDLKVEESGKTIDVDVMENGKANQPGRTDAEHLPTPSAVSC	47.801	1e-78	XP_018830436.1	PREDICTED: methyl-CpG-binding domain-containing protein 11-like isoform X1 [Juglans regia]	68.57	6e-49	sp|Q9XI36|MBD10_ARATH	Methyl-CpG-binding domain-containing protein 10 OS=Arabidopsis thaliana GN=MBD10 PE=1 SV=1	-	-	-	-	-	-	-	K02213|1|2e-16|84.7|ppp:112294962|cell division control protein 6		GO:0003677//DNA binding	GO:0005634//nucleus
4032	PSS26478.1	Structural maintenance of chromosomes protein [Actinidia chinensis var. chinensis]	121539	0.01	1	1	-	0.75	0.748|0.926|0.741|0.352|0.464|0.337|0.996|1.208|0.965	0.308	9	0.04229	PSS26478.1	MNEPRRKRPKISRGEDDYMPGSIVEIELHNFMTFNNLTCKPGPRLNLVVGPNGSGKSSLVCAIALGLGGEPQLLGRASSVGAFVKRGEETGYIKISLRGNTKEERLTIMRKIDTRNKSEWLFNGKSAPKKDVIEVIQQFNIQINNLTQFLPQDRVCEFAKLTPVQLLEETEKAVGDPQLPVQHRALIDKSGELKKLERTVQRNGEYLGQLKSLNAEQERDVERVRQREELLAKVELMKKKLPWLKYDMKKAEYMEAKDQENDAKKKLDEAAKSLNEAKEPIEKKKKGKASQDTKCKQVRNLLDNNAKKRMQLVESEHCLGVQVRGKYNEIEELKRQEESRQQRISRAKEELIAAEVELTNLPSYEPPKDELERLSAQILELEETAREKRHQKAEKERLL…	76.689	0	XP_002272410.1	PREDICTED: structural maintenance of chromosomes protein 5 [Vitis vinifera]	68.81	0	sp|Q9LFS8|SMC5_ARATH	Structural maintenance of chromosomes protein 5 OS=Arabidopsis thaliana GN=SMC5 PE=2 SV=1	At5g15920	1475	0	KOG0979	Structural maintenance of chromosome protein SMC5/Spr18, SMC superfamily	BDL	Chromatin structure and dynamics;Cell cycle control, cell division, chromosome partitioning;Replication, recombination and repair	K22803|1|0.0|1694|vvi:100249983|structural maintenance of chromosomes protein 5	GO:0007062//sister chromatid cohesion;GO:0000724//double-strand break repair via homologous recombination		GO:0030915//Smc5-Smc6 complex;GO:0009506//plasmodesma
4044	PSS17821.1	Nuclear pore complex protein [Actinidia chinensis var. chinensis]	80481.9	0.011	1	1	PSR91780.1	0.81	0.754|0.934|0.861|0.678|0.841|0.759|0.749|0.910|0.838	0.084	9	0.0003035	PSS17821.1	MPDLVSDSGQSSVVPLSPDSPTPVVCPLHHGLKPPISRLSLSWSRGNSLRVSVFRKPAEDGEAGGKVVEVKLGDGDGEIGDAQWRRIAYGSVSPFALLQSRKNSMLSMSRVSASSSPYGAEWWDYVMEYSREINVLLGGQKLPPSSVIEDPKTVLKKVEEPNCLKAAWELMEIFYADKQIQTWTPERLLDWLADYDSLLSGTQPTVHSKLVNFEKELVGLQAIEEDAKYWEAISSALAVGWLDIAVKMLRLHGSYQLDQLGSRELENGLVEAVAVLISKMPRMRPGLAPGKLGECYKTKPDFIKAWETWRAQITKLDCSAFWVQCDHRQTREGLKNLLQIMLGNANILSSATCHWIELHISHLLYIRPFTMGLESMYSLAQKCMQLKPMSSPHKLMRLL…	77.654	0	XP_002283798.1	PREDICTED: nuclear pore complex protein NUP85 [Vitis vinifera]	68.11	0	sp|Q8RXH2|NUP85_ARATH	Nuclear pore complex protein NUP85 OS=Arabidopsis thaliana GN=NUP85 PE=1 SV=1	At4g32910	649	0	KOG2271	Nuclear pore complex component (sc Nup85)	YU	Nuclear structure;Intracellular trafficking, secretion, and vesicular transport	K14304|1|0.0|1162|vvi:100256006|nuclear pore complex protein Nup85	GO:0006606//protein import into nucleus;GO:0006406//mRNA export from nucleus;GO:0045893//positive regulation of transcription, DNA-templated	GO:0017056//structural constituent of nuclear pore	GO:0031080//nuclear pore outer ring
4051	PSR99653.1	Transcription factor bHLH110 like [Actinidia chinensis var. chinensis]	42301	0.039	1	1	-	0.8	0.778|0.954|0.821|0.862|1.050|0.882|0.589|0.695|0.596	0.156	9	0.007486	PSR99653.1	MDSANLHHHHHHHQLQDQLLVGSSPLATPPSCYGLGNSTHAWTTPNALLNPSSFSPNGNGVITNARDHSRQQHDFLVPNSLHSSMNLQDLGFHSPHDMHLARINGELSDSYQKFTEMLQPHTSYMKNEERDLSDMSEKLLLRNFSLGNSQLKGIQYPVGTPSRGNFSQIFPTINISDLNHSSPAISSSLDLFTSADHRFSGCLNQASLSDDLGFYYGLDHMQQSSHRPLSKISPIGNSSFSSGVTEAKRAMEPQVPQSAQKKSRSESRVSCPPIKVRKEKLGDRIAALQQLVAPFGKTDTASVLMEAIGYIKFLQNQVETLSVPYMKASRNHRTSRTIRGGPTEDGTKEPKRDLRSRGLCLVPLSCLSYVTDGGGGVWPPVV	55.227	2e-130	XP_002281118.2	PREDICTED: transcription factor bHLH110 isoform X2 [Vitis vinifera]	41.25	6e-65	sp|Q9SFZ3|BH110_ARATH	Transcription factor bHLH110 OS=Arabidopsis thaliana GN=BHLH110 PE=2 SV=2	-	-	-	-	-	-	-	K05765|1|6e-15|80.5|fve:101301142|cofilin	GO:0006366//transcription from RNA polymerase II promoter	GO:0046983//protein dimerization activity;GO:0001228//transcriptional activator activity, RNA polymerase II transcription regulatory region sequence-specific DNA binding;GO:0001046//core promoter sequence-specific DNA binding	GO:0005634//nucleus
4069	PSS19867.1	Endoglucanase [Actinidia chinensis var. chinensis]	57682.4	0.011	1	1	-	0.77	1.039|0.903|0.787|0.890|0.773|0.654|0.742|0.621|0.540	0.156	9	0.003617	PSS19867.1	MGEGSKSKGFFGWFLVLLVMAVIATAIVITVKKKTQHPEPKLGPVPGPPGAVEKKYGDALKLAMQFFDIQKSGKLVDNEISWRGDSALQDGNEAEIDLSKGMYDAGDHMKFGFPMAFTGTVLSWAILEYGDQMQTVNQLKPAQDSLKWITDYLVNAHPLENVLYVQVGDPELDHKCWDRPEAMTMKRPLTQVNASSPGTDVAAETAAALASASLVFKSANSTYSSLLLKHAKELFTFADKHRGSYSESIPEVQNYYNSTGYGDELLWAASWLYHATGDQSYFDYVTGQNGRDFANWGSPTWFSWDNKLAGTQVLLSRISFFGAKGSSNSENLHNYRKTAEAVVCGLLPKSPTATSSRTDSGLIWVSEWNSLQHPVASAFLAVVYSDYLFTSRTSKISCN…	78.137	0	XP_007017776.1	PREDICTED: endoglucanase 2 [Theobroma cacao]	66.67	0	sp|Q69SG5|GUN24_ORYSJ	Endoglucanase 24 OS=Oryza sativa subsp. japonica GN=Os09g0533900 PE=2 SV=1	-	-	-	-	-	-	-	K01179|1|0.0|741|pavi:110758750|endoglucanase [EC:3.2.1.4]	GO:0030245//cellulose catabolic process	GO:0008810//cellulase activity	GO:0016021//integral component of membrane
4080	PSR96797.1	ATP-dependent Clp protease ATP-binding subunit ClpA CD4B like [Actinidia chinensis var. chinensis]	103649	0.429	9	17	-	0.82	0.898|0.859|0.813|0.866|0.845|0.810|0.783|0.748|0.734	0.055	9	1.893e-05	PSR96797.1	MARALVQSTIFPSSIAVERHDRLKGSGRTKRTVKMMCALQSSPLRSFSGLRGSNALDSVVRSGHGFHSKAATATSVRRKKASRFVPKAMFERFTEKAIKVIMLAQEEARRLGHNFVGTEQILLGLIGEGTGIAAKVLKSMGINLKDARVEVEKIIGRGSGFVAVEIPFTPRAKRVLELSLEEARQLGHNYIGSEHLLLGLLREGEGVAARVLENLGADPNNIRTQVIRMVGESTEAVGAGVGVGSSGNKMPTLEEYGTNLTKLAEEGKLDPVVGRQPQIERVTQILGRRTKNNPCLIGEPGVGKTAIAEGLAQQIASGDVPETIEGKKVITLDMGLLVAGTKYRGEFEERLKKLMEEVKQSDEIILFIDEVHTLIGAGAAEGAIDAANILKPALARGEL…	85.141	0	XP_019243403.1	PREDICTED: ATP-dependent Clp protease ATP-binding subunit ClpA homolog CD4B, chloroplastic-like isoform X1 [Nicotiana attenuata]	84.71	0	sp|P31542|CLPAB_SOLLC	ATP-dependent Clp protease ATP-binding subunit ClpA homolog CD4B, chloroplastic OS=Solanum lycopersicum GN=CD4B PE=3 SV=1	At5g50920	1463	0	KOG1051	Chaperone HSP104 and related ATP-dependent Clp proteases	O	Posttranslational modification, protein turnover, chaperones	K03696|1|0.0|1535|nto:104108357|ATP-dependent Clp protease ATP-binding subunit ClpC	GO:0019538//protein metabolic process	GO:0008233//peptidase activity;GO:0005524//ATP binding	-
4084	PSS33461.1	Chalcone--flavonone isomerase [Actinidia chinensis var. chinensis]	26015.3	0.322	2	3	-	0.81	0.873|0.701|1.013|0.858|0.701|0.973|0.744|0.578|0.835	0.14	9	0.005149	PSS33461.1	MSPPLVTGVQIETVVFPPTAKPTGTDKPFFLGGAGERGLEIEGRFIKFTAIGVYLEESAVPSLAVKWKGKSAEELTESVEFFRDIVSGPFEKFTQVTMILPLTGKQYSEKVTENCVAYWKAVGIYTDAEAKAVEKFIEVFKDETFPPGASIMFTQSPHGSLTISFSKDCSVPETGNAVIENKHLSEAVLESIIGKHGVSPAAKQSLAARMSELLKECDNEAPETVKPQTETAAPKEISV	81.59	4e-135	ASU87415.1	chalcone isomerase [Camellia sinensis]	80.75	3e-136	sp|Q45QI7|CFI_CAMSI	Chalcone--flavonone isomerase OS=Camellia sinensis GN=CHI PE=2 SV=2	-	-	-	-	-	-	-	K01859|1|3e-123|353|pavi:110756675|chalcone isomerase [EC:5.5.1.6]	-	-	-
4119	PSR98834.1	Phosphoglycolate phosphatase [Actinidia chinensis var. chinensis]	15908.8	0.096	1	1	-	0.64	0.852|0.786|0.794|0.750|0.700|0.681|0.428|0.374|0.377	0.191	9	0.00228	PSR98834.1	MRRRYSYIEGVEGLLHALKENNYEMHAFTNYPIWYEMIEDKLKLSTYLSWSFCSCITGKRKPEPDFYLEVLRHLDVEPASCIFIDDRMKNVEAAIDVGIVGVHFKDVNLLHQDLSRLGIDVSANECNRHEDPAKA	85.124	4e-73	XP_003631869.1	PREDICTED: uncharacterized protein LOC100261651 isoform X2 [Vitis vinifera]	61.79	6e-54	sp|Q84VZ1|FHY1C_ARATH	Flavin mononucleotide hydrolase 1, chloroplatic OS=Arabidopsis thaliana GN=FHY1 PE=1 SV=1	At1g79790	139	2e-42	KOG3085	Predicted hydrolase (HAD superfamily)	R	General function prediction only	K20860|1|8e-74|224|vvi:100261651|FMN hydrolase / 5-amino-6-(5-phospho-D-ribitylamino)uracil phosphatase [EC:3.1.3.102 3.1.3.104]	-	-	-
4146	PSS29415.1	Cleavage stimulation factor subunit like [Actinidia chinensis var. chinensis]	70708.6	0.043	2	2	-	0.74	0.836|0.862|0.976|0.617|0.664|0.714|0.609|0.626|0.722	0.128	9	0.0004477	PSS29415.1	MADKYSVEAAEILANEALRLPLSEAVPIYEQLLATFPTAAKYWKQYVEAHMAVNNDDATKQIFSRCLLNCLQIPLWRCYIRFIRKVNEKKGVEGQEETRKAYDFMLGYVGADIASGPVWMEYIMFLKSMPNNFLIFVHFQCLMYLYHYPDIWYDYATWHAKSGSVDSAIKVFHRALKALPDSEVLKYAFAELEESRGAIQPAKKVYESLLGDGVNATALSHIQYIRFLRRTEGVEAARKYFLDARKSPNCTYHVYVAYAMMAFCLDKDPKIAHNVFEAGLKRFMHEPGYILEYADFLSRLNDDRNIRALFERALSSLPPEESVEVWKRFTQFEQTYGDLASMLKVEQRRKEALARAGEENQSALESSLQDVISRYSFMDLWPCSSKDLDHLARQEWLSN…	74.953	0	XP_010656716.1	PREDICTED: cleavage stimulation factor subunit 77 isoform X2 [Vitis vinifera]	60.15	0	sp|Q8GUP1|CTF77_ARATH	Cleavage stimulation factor subunit 77 OS=Arabidopsis thaliana GN=CSTF77 PE=1 SV=1	At1g17760	615	0	KOG1914	mRNA cleavage and polyadenylation factor I complex, subunit RNA14	A	RNA processing and modification	K14408|1|0.0|827|vvi:100262033|cleavage stimulation factor subunit 3	-	-	-
4150	PSS11164.1	Clathrin assembly protein [Actinidia chinensis var. chinensis]	72064.8	0.137	1	1	-	0.52	0.336|0.408|1.141|0.287|0.375|0.943|0.222|0.245|0.684	0.331	9	0.002983	PSS11164.1	MAPSTIRKAIGAVKDQTSIGIAKVASNMAPDLEVAIVKATSHDDEPADEKYIREILHLTSYSRGYVSACVLAVSKRLGKTRDWIVALKTLVLVHRLLSDGDSVFQQEIMRTTRRGTRLLNMSDFRDEAHSNSRDHSAFVRTYALYLDQKLELLLYERKEIGGSGSGGGGGEIERYGSREERWRSPPNRGYDYDYNESRDEMGSGNYGMRRSRSSGDVRETSRDERRDVTPLRDMKPERMFGKMSHLQRLLDRFLACWPTGSAKNSRLVFVAMYPVVKESFKLYADICEVLAVMLDRFFDMEYSDCVKAFDAYASAAKQIDELVAFYNWCKETGVARSSEYPEIQRITDKLLETLEEFVRDRAKASKSPERKVQQSVAQEEPEPNMNEIKALPPPENYTP…	80.395	0	XP_011081548.1	putative clathrin assembly protein At2g25430 [Sesamum indicum]	70.15	0	sp|Q8LF20|CAP2_ARATH	Putative clathrin assembly protein At2g25430 OS=Arabidopsis thaliana GN=At2g25430 PE=1 SV=2	At2g25430	852	0	KOG0251	Clathrin assembly protein AP180 and related proteins, contain ENTH domain	TU	Signal transduction mechanisms;Intracellular trafficking, secretion, and vesicular transport	K20043|1|0.0|955|sind:105155821|clathrin coat assembly protein AP180	GO:0048268//clathrin coat assembly	GO:0030276//clathrin binding;GO:0005545//1-phosphatidylinositol binding	GO:0030136//clathrin-coated vesicle
4152	PSS06455.1	E3 ubiquitin-protein like [Actinidia chinensis var. chinensis]	188612	0.007	1	1	-	0.83	0.800|0.731|0.878|0.718|0.668|0.769|0.972|0.871|1.045	0.124	9	0.003724	PSS06455.1	MEIDSPPDGDALSPRDRIVQRLALHGVPVEIMEKLQPGLVGFLKDNKFLIPDLVSAILSTDDEEVEAVELAPSPTDHFQESMVWLQWLMFEGEPRAALKNLAATSVGQRGVCGAVWGNNDIAYRCRTCEHDPTCAICVPCFKNGNHKDHDYSIIYTGGGCCDCGDATAWKREGFCSRHKGAEQIQPLTEELAKSVGPVLDLVLVYWKNKLMMEDTTSQQSPSIDDHDAEYGKVADGLTSAVVCMLSDFCTHSESLLSFISGRMFSSVGLLDILVRAERFLNDDVVRKLHELLLKLLGEPLFKYEFAIVFLSYYPTVVSEAIKECNDKVFKKFPLLSTFSVQIFTVPTLTPRLVKEKNLLVLLLECLGDIFIACAGEDGRLQVTTWGNLYETTLRVVEDI…	65.391	0	XP_017241254.1	PREDICTED: E3 ubiquitin-protein ligase PRT6 isoform X1 [Daucus carota subsp. sativus]	49.76	0	sp|F4KCC2|PRT6_ARATH	E3 ubiquitin-protein ligase PRT6 OS=Arabidopsis thaliana GN=PRT6 PE=2 SV=1	At5g02300	1147	0	KOG1140	N-end rule pathway, recognition component UBR1	O	Posttranslational modification, protein turnover, chaperones	K11978|1|0.0|1778|cic:CICLE_v10013610mg|E3 ubiquitin-protein ligase UBR3 [EC:2.3.2.27]		GO:0016874//ligase activity;GO:0008270//zinc ion binding	-
4168	PSS07882.1	Protein of unknown function DUF1118 protein [Actinidia chinensis var. chinensis]	20240.2	0.067	1	4	-	0.72	0.875|0.741|0.654|0.734|0.590|0.502|0.909|0.791|0.699	0.13	9	0.0005972	PSS07882.1	MAATAASPTAYLLRNIGISSIPAKSRFRPHLPAKRTLKFLAMSPKNKVNKYDGDWKKQWFGAGIFYEGSEEIPVDVFKKIEKRKVLSNVEKAGLLSKAEELGLTLSSIEKLGVFSKAEELGLLSLLEKAASSSPSALASAALPILVAAILAIVLIPDDSAALVAVQAVIAGALVVGAAGLFVGSVVLGGLQEAD	77.32	5e-97	XP_002271953.1	PREDICTED: uncharacterized protein LOC100250168 [Vitis vinifera]	-	-	-	-	-	-	-	-	-	-	-	-			GO:0016021//integral component of membrane
4189	PSR91746.1	Glycine dehydrogenase [Actinidia chinensis var. chinensis]	61631.8	0.356	1	1	-	0.7	0.858|0.690|0.887|0.778|0.626|0.780|0.601|0.464|0.596	0.139	9	0.0006068	PSR91746.1	MNLRVVDQNTITVSFDETTTLEDVDKLFKVFSCGKPVTFTAASIAPEVPIMIPPGLVRQSPYLTHPIFNSCHTEHELLRYIHKLQSKDLSLCHSMIPLGSCTMKLNATTEMMPVTWPSFSDIHPFAPIEQAEGYQEMFNNLGELLCIITGFDSFSLQPNAGAAGEYAGLMVIRAYHKARGDHHRDVCIIPVSAHGTNPASAAMCGMKIVAVGTDAKGNINIEELRKAAEANKENLSALMVTYPSTHGVYEEGIDEICKIIHDNGGQVYMDGANMNAQVGLTSPGWIGADVCHLNLHKTFCIPHGGGGPGMGPIGVKKHLAPFLPSHPVVPTGGIPSPDKVHPLGTISAAPWGSALILPISYTYIAMMGSKGLTDASKIAILNANYMAKRLEDHYPILFR…	92.527	0	XP_010262151.1	PREDICTED: glycine dehydrogenase (decarboxylating), mitochondrial [Nelumbo nucifera]	89.68	0	sp|P26969|GCSP_PEA	Glycine dehydrogenase (decarboxylating), mitochondrial OS=Pisum sativum GN=GDCSP PE=1 SV=1	At2g26080	1026	0	KOG2040	Glycine dehydrogenase (decarboxylating)	E	Amino acid transport and metabolism	K00281|1|0.0|1074|nnu:104600737|glycine dehydrogenase [EC:1.4.4.2]	GO:0006546//glycine catabolic process	GO:0004375//glycine dehydrogenase (decarboxylating) activity	GO:0005739//mitochondrion
4192	PSS16333.1	Riboflavin synthase [Actinidia chinensis var. chinensis]	30881.4	0.228	1	3	-	0.79	0.787|0.771|0.757|0.868|0.854|0.817|0.762|0.737|0.722	0.051	9	3.071e-06	PSS16333.1	MAISYSLTSLSKTLNPSLHKPSTICNLLKTPHKTHLTPTLNLLKPPPLSRLFTTHIAKFKPKSKSNLIPIRCLFTGIVEEMGRVQYLGSAADGGFTMKILSKTVLEDVNLGDSITVNGTCLTVTDFDTQSAEFTVGLSPETLRITSLVELEPGSVVNLERALKPSTRMGGHFVQGHVDGTGEIVGKEREGDSLWVTVKTSPELLRYIVPKGFIAVDGTSLTVVKVFDDEGCFNFMLVDYTQQNVVIPLKKIGQKVNLEVDILGKYVERILSSGFVNPIKSS	70.877	4e-134	XP_002274029.1	PREDICTED: riboflavin synthase [Vitis vinifera]	-	-	-	-	At2g20690	282	3e-96	KOG3310	Riboflavin synthase alpha chain	H	Coenzyme transport and metabolism	K00793|1|7e-135|386|vvi:100257400|riboflavin synthase [EC:2.5.1.9]	GO:0009231//riboflavin biosynthetic process	GO:0004746//riboflavin synthase activity	GO:0009507//chloroplast
4200	PSS04098.1	AT-hook motif nuclear-localized protein [Actinidia chinensis var. chinensis]	32315.5	0.125	2	2	-	0.68	0.752|0.682|0.804|0.706|0.676|0.748|0.602|0.527|0.613	0.086	9	1.852e-05	PSS04098.1	MEGREGISSSGVTVVGSDAPSDYHVAPRTENLNQPTGSILGGTPQVGVPPPSAAVAVKKKRGRPRKYGPDGSVTKVLSPKPISSSAPSPVIDFSAGKPVKVRPVGPTVKQQQQHRMELDNLGEWVSCAVGTNFTPHIITVNAGEDVTMKVISFSQQGPRAICILSANGVISSVTLRQPDSSGGTLTYEGRFEILSLTGSFMPAESGGIRNRTGGMSVSLASPDGRVMGGGVAGLLVAASPVQIVVGSFIAGNQHEQKPKKQKTESVRAAPAAPSTAAIPISNADMEETSGGQGARTSTTPNPTLSFSSFRGEN	71.296	2e-136	CDP09867.1	unnamed protein product [Coffea canephora]	62.58	9e-115	sp|Q8VYJ2|AHL1_ARATH	AT-hook motif nuclear-localized protein 1 OS=Arabidopsis thaliana GN=AHL1 PE=1 SV=1	-	-	-	-	-	-	-	K23047|1|1e-23|105|bna:106447564|E3 ubiquitin-protein ligase UNKL [EC:2.3.2.27]	-	-	-
4211	PSR90989.1	Inactive ATP-dependent zinc metalloprotease FTSHI 5 like [Actinidia chinensis var. chinensis]	149870	0.008	1	1	-	0.82	0.813|0.744|0.761|0.897|0.828|0.826|0.889|0.807|0.825	0.05	9	1.052e-05	PSR90989.1	MYFSLTCSPCSLSIPLVPLLPSSDRNSIFNFCSFPPKQHRYGRPPIRRFSIKSSQNPLRPPPIFSVKFPQSSSKSTNKQQKPDFYDDENSVLKCIAKPIVYTLFCIAIGLFSLYRGPAIAATTVAVASEEKERERKDVVMEVKDHQYSNFTRRLLQVVSVLLRRIEQARLGKGDLNVVDKALRKVKLTREKLQEEIMGGLYADVKKSKNERQKLVKQSGKVLNSMLKAKRERDKVLRRDGDKAKERIAKLEDMVHTAQKEYARIWEGIGEIEDRILRTETMALSIGVRELSFIERESEILVEKLRQEKMRQGHESAPKSPLTKLSRADIQKELQSATRQFWEQMILPSVLEAGDIGFPFDQESIEFAERIKQALEYSRDMQSNLEAGIRTNMSMFGDEK…	67.727	0	XP_002274609.1	PREDICTED: probable inactive ATP-dependent zinc metalloprotease FTSHI 5, chloroplastic [Vitis vinifera]	62.94	0	sp|F4J3N2|FTSI5_ARATH	Probable inactive ATP-dependent zinc metalloprotease FTSHI 5, chloroplastic OS=Arabidopsis thaliana GN=FTSHI5 PE=2 SV=1	At3g04340	1523	0	KOG0731	AAA+-type ATPase containing the peptidase M41 domain	O	Posttranslational modification, protein turnover, chaperones	K03798|1|1e-40|161|csl:COCSUDRAFT_1880|cell division protease FtsH [EC:3.4.24.-]	GO:0006508//proteolysis	GO:0004176//ATP-dependent peptidase activity;GO:0004222//metalloendopeptidase activity;GO:0005524//ATP binding;GO:0008237//metallopeptidase activity	GO:0009941//chloroplast envelope;GO:0016021//integral component of membrane;GO:0005739//mitochondrion;GO:0009506//plasmodesma
4258	PSS00254.1	Protein FAR1-RELATED SEQUENCE like [Actinidia chinensis var. chinensis]	88653.2	0.086	1	1	-	0.82	0.832|0.748|0.822|0.818|0.744|0.791|0.912|0.804|0.883	0.055	9	1.732e-05	PSS00254.1	MTQVMAGKKVIAICQSGGEFETDEDGSMSYKGGVAHAMEIDEQMKFKDFKKEVAEMFNSNIGTISLKYFIPGNKKTLITISNEKDIKRMIKFQGDSYTADIYVVTEEVVAAHVPNVPARRGRNRSNRTTLPEAMVPVDDPVNVVDDVMDDTTEAVVLDATPHVNPHTIITTHIPVPVHSIGSNNAIIGSQEWQDTITGVGQRFRSVHEFREALRTYAIANQFTLMYKKNENERVTAKCKAEGCPWRIHASRLATTQLFCIKKMNATHTCDGVIVPTGLQATRNWVASIIKEKLKVNPDYNPKDIVNDIKQECGIQIKYYQAWRWKEIAKEQLQGSYKKAYNQLPFYCEKIMETNPGSLATFTTKEDSSFHRLFVSFHACLYGFQRGCRPLLFLGSTPLK…	71.005	0	XP_002276424.1	PREDICTED: uncharacterized protein LOC100251030 isoform X1 [Vitis vinifera]	-	-	-	-	-	-	-	-	-	-	-	K17604|1|0.0|1120|vvi:100251030|zinc finger SWIM domain-containing protein 3		GO:0008270//zinc ion binding	-
4276	PSS04563.1	Binding partner of like, partial [Actinidia chinensis var. chinensis]	27120.6	0.277	5	9	-	0.82	0.770|0.767|1.045|0.819|0.822|1.089|0.663|0.654|0.774	0.151	9	0.00718	PSS04563.1	IRTVKVSNVSLSATEQDIKEFFSFSGEIECVEMHSENERSQTAHVTFKDPQGAETAVLLSGATIVDQSVAIDLAPDYKLPSTASATPIASENRNTGGAGSAVQKAEDVVSSMLAKGFILGKDAVNKAKTFDEKHHFTSTATAKVVSLDQKIGLSEKISMGTTMVNDKVKEMDQKFQVSEKTKSAFAAAEQTVSTAGSAIMKNRYILTGTSWVTGAFNKVAKAAEEVGQKTKEKVAEEEQGRYSAQGYSQVHDS	82.869	6e-148	XP_016504333.1	PREDICTED: binding partner of ACD11 1-like [Nicotiana tabacum]	65.25	4e-111	sp|Q9LFD5|BPA1_ARATH	Binding partner of ACD11 1 OS=Arabidopsis thaliana GN=BPA1 PE=1 SV=1	-	-	-	-	-	-	-	-		GO:0003723//RNA binding	-
4284	PSS01086.1	Sister chromatid cohesion protein PDS5 B-B like [Actinidia chinensis var. chinensis]	75509.9	0.113	2	2	-	0.75	0.738|0.711|0.913|0.717|0.697|0.865|0.659|0.617|0.790	0.095	9	9.115e-05	PSS01086.1	MASANVELEKQLVEAGNGLLQPPSSVDELFYLLDKVENLLSRVEQSPSKSMQTALSPSMNALVTDELLRHPDVDVKVAVASCISEITRITAPDAPYDDDQMKDIFQLIVSSFENLSDKSSKSYGKRAMILETVAKVRSCVVMLDLECDGLIVEMFQHFLKDIRDYHPDNVFSSMETIMTLVLEESEDISMELISPILASVKRDNQEILPIARKLGERVFGNCAVKLKPCLKQAMKSLGFSLDDYSEVIASICDGANGAVGHSDDNVGGEHPTEGSKLATTSSDGAAQADENKSAVASPHEAAQDQLTGENSTEARPEGDHPSEGRSPKSIMSNGVAETGYEDKMADLESSKKLEDSHQADQLVETTATGNAEPDDTNGGVKPDSKIEETSKKRGKKPKS…	56.721	0	XP_021644966.1	transcriptional regulator ATRX-like [Hevea brasiliensis]	-	-	-	-	At4g31880	430	2e-139	KOG1525	Sister chromatid cohesion complex Cohesin, subunit PDS5	D	Cell cycle control, cell division, chromosome partitioning	K11267|1|6e-70|236|vvi:109121389|sister chromatid cohesion protein PDS5	-	-	-
4304	PSS08449.1	Transcription factor like [Actinidia chinensis var. chinensis]	77538.7	0.021	1	1	-	0.65	0.973|0.910|0.731|0.709|0.666|0.518|0.510|0.457|0.367	0.205	9	0.002203	PSS08449.1	MPLSEFYRMARGRLESAQQRTTTSSTDLSHVPDNEFVELVWDNGQIMMQGQSSRPRRNSASSNFQFQTPKHRDKDLGNATNSKIGKFGLMDSVTRDFAPAVPSGDMGLDQDDDMVPWLNYPIEDSLQDDYCSELLPELSGVTVNELSAQNSFAAIDKRNSSNQNSSNSVSVQNGLGLGLKQAETPKAASLDAGESSRSRSGQFYPWSFQESQTSVLRSGISNNISNSTSNTKHTVCGDSVQDQASAGGFPSIKTQKQDSAQPNHNSGIINFSLFSRPAALVRANLQNVGAVATPGTSSIEGRGGKNKEPSSSNLAESHSQPNLVPPKVDSKLILSKPLEESRAANQSEAVSQEDAVKNDKSPNKVVGAALSKGLPDVEKTAKPVVASSSVCSGNSAERA…	61.073	0	XP_010659764.1	PREDICTED: transcription factor PIF3 isoform X1 [Vitis vinifera]	37.87	1e-73	sp|O80536|PIF3_ARATH	Transcription factor PIF3 OS=Arabidopsis thaliana GN=PIF3 PE=1 SV=1	Hs20127416	52	3e-06	KOG3561	Aryl-hydrocarbon receptor nuclear translocator	K	Transcription	K12126|1|0.0|787|vvi:100247781|phytochrome-interacting factor 3		GO:0046983//protein dimerization activity	-
4324	PSR98065.1	malate dehydrogenase [Actinidia chinensis var. chinensis]	48029.5	0.338	12	34	-	0.82	0.942|0.909|0.810|0.897|0.874|0.774|0.791|0.748|0.664	0.09	9	0.0006669	PSR98065.1	MALAELSPSHTKIHSPQLSYLSTCHSNHRGLSLRPLPRTQIARVVCSVTSTQQVQSPPIQVEDSKKKPECYGVFCLTYDLKAEDETKSWKKLINIAVSGAAGMISNHLLFKLASGEVFGPDQPIALKLLGSERSFQALEGVAMELEDSLYPLLREVSIGIDPYDVFQDAEWALLIGAKPRGPGMERADLLDINGQIFAEQGKALNAVASQNVKVIVVGNPCNTNALICMKNAPNIPAKNFHALTRLDENRAKCQLALKAGVFYDQVSNMTIWGNHSTTQVPDFLNAKINGIPVKEVIKDTKWLEEEFTEMVQKRGGVLIQKWGRSSAASTAVSVVDAIRSLVTPTPEGDWFSTGVYTTGNPYGIADGLVFSMPCRSKGDGDYELAKDVIFDDYLLKRIK…	85.649	0	XP_002265080.1	PREDICTED: malate dehydrogenase [NADP], chloroplastic [Vitis vinifera]	83.79	0	sp|O48902|MDHP_MEDSA	Malate dehydrogenase [NADP], chloroplastic OS=Medicago sativa GN=MDH1 PE=2 SV=1	At5g58330	703	0	KOG1496	Malate dehydrogenase	C	Energy production and conversion	K00051|1|0.0|781|vvi:100247974|malate dehydrogenase (NADP+) [EC:1.1.1.82]	GO:0005975//carbohydrate metabolic process;GO:0006107//oxaloacetate metabolic process;GO:0006734//NADH metabolic process;GO:0006099//tricarboxylic acid cycle;GO:0051775//response to redox state;GO:0006108//malate metabolic process	GO:0046554//malate dehydrogenase (NADP+) activity;GO:0008746//NAD(P)+ transhydrogenase activity;GO:0030060//L-malate dehydrogenase activity	GO:0009579//thylakoid;GO:0009941//chloroplast envelope;GO:0009570//chloroplast stroma;GO:0048046//apoplast;GO:0005739//mitochondrion;GO:0009507//chloroplast
4327	PSR95985.1	U2 small nuclear ribonucleoprotein, partial [Actinidia chinensis var. chinensis]	32644	0.359	3	4	-	0.82	0.809|0.922|0.813|0.916|1.032|0.898|0.648|0.713|0.627	0.137	9	0.005888	PSR95985.1	MVRLTADLIWKSSHFFNAIRERELDLRGNKIPVIENLGATEDQFDCIDLSDNEIVKLENFPYLSRLGTLFMNNNRITRINPKIGEFLPKLHSLVLTNNRLTNLVEIDPLESLPKLQFLSLLDNNITKKPNYRLYVIHKLKSLRLLDFKKVKHKERIEAQNLFSSQEAEEQAKKESAKTFVPGEIPSTPEIPKEEPTPKTVVPTPEQIIAIKAAIVNSQTLEEVARLEKALKSGQLPADLKIGDGDTMTNNEAAKEDKMVTDEENEANDEPKDAEPEQKNNESADMEQ	82.927	2e-169	XP_019167365.1	PREDICTED: U2 small nuclear ribonucleoprotein A' [Ipomoea nil]	74.61	3e-131	sp|P43333|RU2A_ARATH	U2 small nuclear ribonucleoprotein A' OS=Arabidopsis thaliana GN=At1g09760 PE=2 SV=2	At1g09760	372	7e-131	KOG1644	U2-associated snRNP A' protein	A	RNA processing and modification	K11092|1|4e-170|476|ini:109163101|U2 small nuclear ribonucleoprotein A'	GO:0000398//mRNA splicing, via spliceosome		GO:0019013//viral nucleocapsid;GO:0030529//intracellular ribonucleoprotein complex
4336	PSS31298.1	Cysteine protease [Actinidia chinensis var. chinensis]	41536.4	0.137	4	5	-	0.81	0.819|0.790|0.834|0.875|0.813|0.912|0.762|0.709|0.750	0.063	9	3.216e-05	PSS31298.1	MERLTLFSLFLLLIPYLCFAEALSTVDPDDSDDLLIRQVVSDGEDHILNAENHFSLFKSKYGKTYATQEEHDYRFSVFKANLRRAKRHQLLDPSAVHGVTKFSDLTPAEFRRNFLGLKSRLKLPADAQKAPILPTNNLPDDFDWREKGAVTGVKNQGSCGSCWSFSTTGALEGAHFLATGELVSLSEQQLVDCDHECDPEERGACDEGCNGGLMNSAFEYTLKAGGLVREEDYPYTGRNGQCKFDKSKIAASVSNFSVISVDEDQVAANLVKNGPLAVGINAVYMQTYIGGVSCPYLCGKHLDHGVLLVGYGASAYAAIRFKEKPYWIIKNSWGESWGENGYYHLCRGPHAHNLCGVDSMVSTVAAVHINK	83.09	0	XP_014501484.1	PREDICTED: cysteine proteinase 15A-like [Vigna radiata var. radiata]	73.98	0	sp|P43296|RD19A_ARATH	Cysteine protease RD19A OS=Arabidopsis thaliana GN=RD19A PE=1 SV=1	At4g39090	566	0	KOG1542	Cysteine proteinase Cathepsin F	O	Posttranslational modification, protein turnover, chaperones	K01373|1|0.0|604|vra:106762220|cathepsin F [EC:3.4.22.41]	GO:0051603//proteolysis involved in cellular protein catabolic process	GO:0004197//cysteine-type endopeptidase activity;GO:0008234//cysteine-type peptidase activity	GO:0005764//lysosome;GO:0005615//extracellular space
4348	PSS06148.1	Protein LHCP TRANSLOCATION DEFECT like [Actinidia chinensis var. chinensis]	19281.7	0.256	1	2	-	0.6	0.868|0.567|0.741|0.710|0.528|0.600|0.603|0.351|0.462	0.155	9	0.0003306	PSS06148.1	MASMPCTLRPIFAAKSLNSSSSSRGFAPNLARIGSRFLGSRIKPGSRTRPGRGGLRITCWFKFGKNGVDAEGAGIYGSQSRDDFDRDDVEQYFNYMGMLAVEGTYDKLEKLLSQNIHPVDILLMMATSEGDKPKIEELLRAGASYTVKDANGLTALDKAGSEEIKDFIRGFSAQKA	69.78	3e-82	XP_004294361.1	PREDICTED: protein LHCP TRANSLOCATION DEFECT [Fragaria vesca subsp. vesca]	73.61	5e-74	sp|Q8VY88|LTD_ARATH	Protein LHCP TRANSLOCATION DEFECT OS=Arabidopsis thaliana GN=LTD PE=1 SV=1	-	-	-	-	-	-	-	K01802|1|4e-07|52.0|fve:101303016|peptidylprolyl isomerase [EC:5.2.1.8]	-	-	-
4350	PSR87528.1	Very-long-chain 3-oxoacyl-CoA reductase [Actinidia chinensis var. chinensis]	36385.5	0.259	2	2	-	0.77	0.762|0.856|0.710|0.771|0.867|0.702|0.748|0.829|0.687	0.067	9	1.603e-05	PSR87528.1	MELCSVMEPLKSQPLWLLLLLGLGSLSLLKCSFAFLKWVYVHFLRPAKNLKKYGSWALVTGPTDGIGKGFAFQLARKGLNLVLVGRNPEKLKDVSDSIRAKFRQTQIKTVVVDFSGDLNEGVNRIRETIEGLDVGILINNVGVSYPYARFFHEVDDKLLGDLIKVNVEGTTKVTQAVLPGMIKRKKGAIVNIGSGAAIVIPSDPLYAVYAATKAYIDQFSRCLYVEYKKSGIDVQCQVPLYVATKMASIRRSSFFVPSTDCYARAGLRWIGYEPRCTPYWPHSLLWALACLLPESIIDAWRLRFCLAIRKKGQLKDSRKKE	84.112	0	XP_018820232.1	PREDICTED: very-long-chain 3-oxoacyl-CoA reductase 1 [Juglans regia]	67.91	6e-171	sp|Q8L9C4|KCR1_ARATH	Very-long-chain 3-oxoacyl-CoA reductase 1 OS=Arabidopsis thaliana GN=KCR1 PE=1 SV=1	7290849	211	6e-66	KOG1014	17 beta-hydroxysteroid dehydrogenase type 3, HSD17B3	I	Lipid transport and metabolism	K10251|1|0.0|573|jre:108990665|17beta-estradiol 17-dehydrogenase / very-long-chain 3-oxoacyl-CoA reductase [EC:1.1.1.62 1.1.1.330]			GO:0016021//integral component of membrane
4351	PSR92781.1	Pentatricopeptide repeat-containing protein [Actinidia chinensis var. chinensis]	73477.6	0.062	1	1	-	0.81	1.116|0.861|0.746|0.950|0.744|0.623|0.944|0.718|0.621	0.166	9	0.009999	PSR92781.1	MNHTLSHLLQGCQSLRSLKSIHARLMIDGSIASSDLILNKILRLYSRFGATDYAHKLFDEIPQPNSFLWTSMIHGYVENCEYTQGLATFSWMRSESVDPLNFTICSVLKALARLTRLKDGVVLYGFVLKSGFGCDLIVQNAMIDLFMRCGKVDFARWVFNEMHEKDVISWNSMISGYGNNGRVEAARELFNIMVERSVISWTSMICGYVKAGDMLEAQALFEAMPVKDLASWNVMISGYVEAGDLNAARFAFERTRVRDVGTWNLMISGFCKAGEVESAKDYFNRMPSKNVASWTIMIDGYIKAGEIDNARCLFDQMPERNLVAWSTIIGGCAKNGQPRCALELFDRFKEQGIKTDETFILGIILACSQLGILDAAESIIRDYVGPSLSSNLRVVTSLI…	71.184	0	XP_002280144.2	PREDICTED: pentatricopeptide repeat-containing protein At4g02750 [Vitis vinifera]	36.11	4e-142	sp|Q9SY02|PP301_ARATH	Pentatricopeptide repeat-containing protein At4g02750 OS=Arabidopsis thaliana GN=PCMP-H24 PE=3 SV=1	At4g02750	432	7e-142	KOG4197	FOG: PPR repeat	R	General function prediction only	K19589|1|4e-117|377|mtr:MTR_4g024860|release factor glutamine methyltransferase [EC:2.1.1.297]!K06180|3|2e-114|365|sind:105165964|23S rRNA pseudouridine1911/1915/1917 synthase [EC:5.4.99.23]	GO:0009451//RNA modification	GO:0004519//endonuclease activity;GO:0003723//RNA binding	GO:0043231//intracellular membrane-bounded organelle
4382	PSS34650.1	UPF0481 protein [Actinidia chinensis var. chinensis]	55578	0.165	6	6	-	0.78	0.767|0.733|0.638|0.814|0.845|0.663|0.827|0.955|0.736	0.098	9	0.000242	PSS34650.1	MEDSLVETIHKKISEAAEKRKALQGAQLEASIYRVPDELRKLKTSAYRPRLVSIGPFHSKHQKSSCQELKASYADSLLSRVSGSEEQAYELLKECVEEMERAVDKAKKCYSEQVDELNPEMLFIDGCFVLEFLYNDYQIKHLLAQGTTGSIHEANQIRKEDNIFCSALARLIVQHDLLLLENQLPFFILEKLFHLTVERVPDHPPSRTLKEYVILSFGDSIDPKRKAKFEKSCTCSPRECVLCLTSFCRPMPRMYIGNKGMELENSPIAEENYHVLHILHDYYLPLEKVEDSGESSKKESDLSELMHSASDLDYAGVKFVPIKDGFTVSFSRSQGQFEIPIIRIDDFTEPLLRNLIAFEQCCPRVSSHFTSFAYLMDSLISTEKDVKVLERAGVIHNYL…	31.984	2e-69	KVI11509.1	Protein of unknown function DUF247, plant [Cynara cardunculus var. scolymus]	27	2e-27	sp|Q9SD53|Y3720_ARATH	UPF0481 protein At3g47200 OS=Arabidopsis thaliana GN=At3g47200 PE=2 SV=1	-	-	-	-	-	-	-	K01193|1|1e-08|62.4|ats:109747879|beta-fructofuranosidase [EC:3.2.1.26]			GO:0016021//integral component of membrane
4384	PSR89213.1	Serine/threonine-protein phosphatase 2A [Actinidia chinensis var. chinensis]	66129.3	0.319	3	4	-	0.79	0.851|0.848|0.866|0.892|0.888|0.894|0.611|0.685|0.595	0.125	9	0.00245	PSR89213.1	MAMVDEPLYPIAVLIDELKNEDIQLRLNSIRRLSTIARALGEERTRKELIPFLSENNDDDDEVLLAMAEELGVFVPYVGGFEHANVLLPPLETLCTVEETCVRDKAVESLCRIGAQMREQDLVDSFIPLVKRLAAGEWFTARVSSCGLFHIAYPSAPEALKTELRTIYSQLCQDDMPMVRRAAATNLGKFAATVEAAHMKTDIMSMFEDLTQDDQDSVRLLAVEGCAALGKLLDPQDCVTHILPVIVNFSQDKSWRVRYMVANQLYELCEAVGPESTRTDLVPAYVRLLRDNEAEVRIAAAGKVTKFCRILSPELAIQHILPCVKELSSDSSQHVRSALASVIMGMAPVLGKDATIEQLLPIFLSLLKDEFPDVRLNIISKLDQVNQVIGIDLLSQSLL…	95.06	0	XP_018851318.1	PREDICTED: serine/threonine-protein phosphatase 2A 65 kDa regulatory subunit A beta isoform [Juglans regia]	91.82	0	sp|Q38950|2AAB_ARATH	Serine/threonine-protein phosphatase 2A 65 kDa regulatory subunit A beta isoform OS=Arabidopsis thaliana GN=PP2AA2 PE=1 SV=2	At3g25800	1114	0	KOG0211	Protein phosphatase 2A regulatory subunit A and related proteins	T	Signal transduction mechanisms	K03456|1|0.0|1143|jre:109013629|serine/threonine-protein phosphatase 2A regulatory subunit A	-	-	-
4434	PSS17378.1	Protein Ycf2 like [Actinidia chinensis var. chinensis]	23099.6	0.053	1	1	-	0.73	0.752|0.762|0.774|0.663|0.675|0.663|0.776|0.759|0.770	0.05	9	8.822e-07	PSS17378.1	MSTTVLMVAPGFTSLQIKPCFRSQSFIANLDSCSANSKHKDGSWFGGVLRWRDSDSKRSMVVYSSVEPGTQPPNSNPNPNSWKSWVLSAIITIILPFFTHKWGPLFKITKTVEATVETVEQLTEVIEKVAEGVEDLADDFADKLPEGGKLRHAIETVENAAKETVKGAEFVGHIIDKVQEVKQEVESYVNDEGGGTAKESTDQKEEKEG	43.169	8e-40	XP_012067933.1	uncharacterized protein LOC105630660 isoform X2 [Jatropha curcas]	-	-	-	-	-	-	-	-	-	-	-	-	-	-	-
4440	PSR91202.1	Transferase protein [Actinidia chinensis var. chinensis]	30795.5	0.047	1	1	PSR91203.1	0.83	0.958|0.794|1.049|0.755|0.673|0.825|0.805|0.676|0.892	0.124	9	0.003529	PSR91202.1	MNHTVADGSSFWDFFNSWSEISRGLGNISQPPALTRCFPSDIDCPIRIPFSMKQMDETSIVAPFQERVFRFTKEKIAELKAKANAEMSTTSISSLQALLAHLWRAVVRCQHMEANQEVKYVVVASARPRLQPPLPAGYFGNTIYGEIVTITAGELVGQTLGWVAWKINRKIALQTNDEIRNFLMCWVKKPKLLAISSYPNNTLFTTSSPRFNVYGNDFGWGKPVAVRSGSADKSDGKITLFPGAEEGSIDIEVCLSPETLLALGDDEEFMEAISI	58.545	8e-112	XP_018813731.1	PREDICTED: uncharacterized acetyltransferase At3g50280-like [Juglans regia]	42.45	8e-69	sp|Q9SND9|Y3028_ARATH	Uncharacterized acetyltransferase At3g50280 OS=Arabidopsis thaliana GN=At3g50280 PE=3 SV=1	-	-	-	-	-	-	-	K22889|1|5e-96|293|ghi:107943885|trichothecene 3-O-acetyltransferase [EC:2.3.1.-]		GO:0047672//anthranilate N-benzoyltransferase activity;GO:0016747//transferase activity, transferring acyl groups other than amino-acyl groups	-
4479	PSS19549.1	Biotin carboxylase [Actinidia chinensis var. chinensis]	252032	0.092	2	2	-	0.83	0.674|0.862|1.017|0.738|0.933|1.086|0.599|0.732|0.862	0.162	9	0.01605	PSS19549.1	MLEAQRRPLMVGVGRHSIEHINGPIPLRSPIAVAEVSDFCYALGGKKPIHSILIANNGMAAVKFIRSVRTWAYETFGTEKAILLVAMATSEDMRINAEHIRIADQFVEVPGGTNNNNYANVQLIVEMAEITRVDAVWPGWGHASEIPELPDALTAKGITFLGPPAASMAALGDKIGSSLIAQAAAVPTLPWSGSHVKIPPDSCLVAIPDDIYSKACVYTTEEAIASCQIVGYPAMIKASWGGGGKGIRKVHNDDEVRALFKQVQGEVPGSPIFIMKVASQSRHLEVQLLCDQYGNVTALHSRDCSVQRRHQKIIEEGPITVAPLETVKKLEQAARRLAKCVNYVGAATVEYLYSMDTGEYYFLELNPRLQVEHPVTEWIAEVNLPAAQVAVGMGIPLWQ…	86.508	0	OMO85801.1	Carboxyl transferase [Corchorus capsularis]	80.93	0	sp|Q38970|ACC1_ARATH	Acetyl-CoA carboxylase 1 OS=Arabidopsis thaliana GN=ACC1 PE=1 SV=1	At1g36160	3761	0	KOG0368	Acetyl-CoA carboxylase	I	Lipid transport and metabolism	K11262|1|0.0|4075|tcc:18592201|acetyl-CoA carboxylase / biotin carboxylase 1 [EC:6.4.1.2 6.3.4.14 2.1.3.15]	GO:0006633//fatty acid biosynthetic process	GO:0004075//biotin carboxylase activity;GO:0046872//metal ion binding;GO:0005524//ATP binding;GO:0003989//acetyl-CoA carboxylase activity	-
4551	PSR98503.1	IQ domain-containing protein [Actinidia chinensis var. chinensis]	56250.1	0.024	1	1	-	0.82	0.894|0.781|0.952|0.802|0.711|0.835|0.828|0.707|0.861	0.08	9	0.0002545	PSR98503.1	MEVETQSLSDLDLTQKPPFPYSVDVGTDACEMPQSPATVLSVTTGFESPATESEKTGFESPVVAVDGDSTANGEALRCEAVSAMKVQKFYRSYRTRRMLADSAVIAEELWWQAIDYARLNHSTISFFNFTKPETAALRWSRISLNASKVGKGLSKDDKAQKLAFQHWIEAIDPRHRYGHCLHKYYEEWCKTDAGQPFFYWLDVGCGKEVDLKDCPRSNLQQQCIKYLGPQEREHYEYIVVEGKIVHKQSGIFLDTIKGKPGAKWIFVMSTSKKLYAGQKKKGLFHHSSFIAGGATLAAGRLEAEDGTLKSISPYSGHYRPTDDSLDSFLSFLKDSGVNVDEVEILKANDVYEGSEYSKSNREEITIQLSTDSESVQLDIPKEDETDVASEPIEAPKTET…	66.533	0	XP_010110598.1	hypothetical protein L484_001201 [Morus notabilis]	64.66	0	sp|Q9LFA4|IQM3_ARATH	IQ domain-containing protein IQM3 OS=Arabidopsis thaliana GN=IQM3 PE=2 SV=1	-	-	-	-	-	-	-	K04733|1|1e-92|310|han:110908553|interleukin-1 receptor-associated kinase 4 [EC:2.7.11.1]!K06892|2|2e-10|65.1|bna:106454088|feruloyl-CoA ortho-hydroxylase [EC:1.14.11.-]!K01214|3|6e-10|62.8|vra:111240847|isoamylase [EC:3.2.1.68]	-	-	-
4553	PSR84732.1	Pyruvate dehydrogenase E1 component subunit beta-1 like [Actinidia chinensis var. chinensis]	41524.2	0.243	3	6	-	0.83	0.854|0.942|0.714|0.978|0.980|0.759|0.776|0.864|0.639	0.121	9	0.004793	PSR84732.1	MWGIIRQKVGAGGFPVPILEQSLPRLRPAVSAWRRYSSAAKEMTVRDALNSALDEEMSADPKVFLMGEEVGEYQGAYKISKGLLEKYGPDRVLDTPITEAGFAGIGVGAAYYGLRPIVEFMTFNFSMQAIDHIINSAAKSNYMSAGQINVPIVFRGPNGAAAGVGAQHSQCYAAWFGACPGLKVLAPYSSEDARGLLKAAIRDPDPVVFLENELLYGESFPISAEALDSSFCLPIGKAKIEREGKDVTITAFSKMVGYALKAAEILAKEGISAERFVTKQVINLRSIRPLDTATINASVRKTNRLVTVEEGFPQHGVGAEICTSVIEESFIYLDAPVERIAGADVPMPYAANLERMAVPQVEDIVCAVKRACYRSVPMTATA	89.791	0	XP_012088753.1	pyruvate dehydrogenase E1 component subunit beta-1, mitochondrial isoform X1 [Jatropha curcas]	84.55	0	sp|Q6Z1G7|ODPB1_ORYSJ	Pyruvate dehydrogenase E1 component subunit beta-1, mitochondrial OS=Oryza sativa subsp. japonica GN=Os08g0536000 PE=2 SV=1	At5g50850	625	0	KOG0524	Pyruvate dehydrogenase E1, beta subunit	C	Energy production and conversion	K00162|1|0.0|697|jcu:105647330|pyruvate dehydrogenase E1 component beta subunit [EC:1.2.4.1]	GO:0006086//acetyl-CoA biosynthetic process from pyruvate;GO:0006096//glycolytic process	GO:0004739//pyruvate dehydrogenase (acetyl-transferring) activity	GO:0005759//mitochondrial matrix
4583	PSS16444.1	Anthocyanidin 3-O-glucoside 2''-O-glucosyltransferase [Actinidia chinensis var. chinensis]	48250.4	0.101	1	2	-	0.77	0.772|0.572|0.766|0.980|0.735|0.959|0.792|0.605|0.772	0.136	9	0.001819	PSS16444.1	MYPWFALGHLTPFLHLSNKLARKGHKISFLIPTKTQQKLEPFNLHPDLITFIPVTVPHVDGLPLGAETTSDVPYPLQTLLMTAMDRTEKYVEDVFLGLKVDVVFFDFTHWMPSVAKRLGIKSVNYCIISPATIGYTMSPARQLQGRELTEADLMVTPLGYPDSSIRLRTHEARAFAARRVMKFGGDTRFCDRNFISFSECDAMGFKTCREIEGPYCDFLESQFEKPVLLSGRDGSVIYCAFGSECTLKMNQFQELLLGLVLTGMPFLAVLKPPIGAKSVEEALPEKFETSVEGRGVVHEGWVQQQLILEHPSVGCFITHCGSGSLSEALFNKCQLVLLPNVGDQIINARMMSQNLKVGVEVEKGEEDGLFTGESVCRAVRDAMEEGSEVAKEVRDNHAK…	73.884	0	AKA44585.1	UGTPg34 [Panax ginseng]	61.61	0	sp|Q53UH4|DUSKY_IPONI	Anthocyanidin 3-O-glucoside 2''-O-glucosyltransferase OS=Ipomoea nil GN=3GGT PE=1 SV=1	At5g54010	429	6e-148	KOG1192	UDP-glucuronosyl and UDP-glucosyl transferase	GC	Carbohydrate transport and metabolism;Energy production and conversion	K22794|1|0.0|610|cmax:111486602|flavonol-3-O-glucoside/galactoside glucosyltransferase [EC:2.4.1.239 2.4.1.-]	GO:0009718//anthocyanin-containing compound biosynthetic process;GO:0043473//pigmentation;GO:0008152//metabolic process	GO:0102455//anthocyanidin 3-O-glucoside 2''-O-glucosyltransferase activity;GO:0016758//transferase activity, transferring hexosyl groups	-
4606	PSS17442.1	Tryptophan aminotransferase-related protein [Actinidia chinensis var. chinensis]	52426.7	0.03	1	1	-	0.75	0.684|0.581|0.884|0.770|0.670|0.974|0.709|0.586|0.890	0.14	9	0.001165	PSS17442.1	MARIQSPDHFALCLVFSLVLNFYFCTKLYFSGCNVNNYQLSWSQRAAEEAEAVASVDCSGHGKAYLDGHFVDGKAVCECNSCFGGPDCSQFFPGCVADADGGDPLFLEPFWIHHAASSALVVAGWHRMSYVFNDHSFISHELEKQIHKLHSVAKNAVTEGKYIIFGAGSTQLISAAVYALSPDNSSSPARVVASIPYYPIYQIQTDFFNSVNFEFQGDASLWKTNNSDSSTNVIEFVTSPNNPDGQLKKAVLQGSSSVKAIHDHAYYWPHFTAIPAPADEDIMIFTISKLTGHAGSRFGWAVVKDEAVYQRMVWYMTLSSMGVSRDAQLRALKLLKVVLKGDGRRIFDYAYNTMSKRWEKLSRAVSKSKRYSLQEIPSQYCNFFKKVRGPSPAYAWLKC…	66.379	0	XP_015577953.1	PREDICTED: tryptophan aminotransferase-related protein 4-like [Ricinus communis]	54.05	0	sp|Q93Z38|TAR4_ARATH	Tryptophan aminotransferase-related protein 4 OS=Arabidopsis thaliana GN=TAR4 PE=2 SV=2	-	-	-	-	-	-	-	K14548|1|0.0|587|mesc:110609029|U3 small nucleolar RNA-associated protein 4!K16903|2|1e-113|348|ppp:112295190|L-tryptophan---pyruvate aminotransferase [EC:2.6.1.99]		GO:0016846//carbon-sulfur lyase activity;GO:0047654//alliin lyase activity	GO:0016021//integral component of membrane
4617	PSR96503.1	Long-chain-aldehyde dehydrogenase [Actinidia chinensis var. chinensis]	12699.5	0.08	1	4	PSR84667.1	0.61	0.649|0.597|0.659|0.554|0.638|0.677|0.611|0.544|0.580	0.047	9	5.852e-08	PSR96503.1	MGDPYQKAKGGRLTFKGSGVATLSKSIDKKKNKKGRDKHKSFSEFQPELEAEAEEASVGGEIYTIDAAKRMKYDQLFPVEAKKFNYDPRSNVKSVEDALDDRVKKKADRYCK	61.667	5e-36	XP_009761188.1	PREDICTED: uncharacterized protein LOC104213390 [Nicotiana sylvestris]	-	-	-	-	-	-	-	-	-	-	-	-			GO:0005730//nucleolus
4634	PSR91200.1	Serine/threonine-protein kinase [Actinidia chinensis var. chinensis]	65400.3	0.234	12	21	-	0.83	0.919|0.850|0.725|0.860|0.802|0.689|0.971|0.888|0.736	0.095	9	0.0009949	PSR91200.1	METVAAGRVGFGGAKLHTLNPKPPFPLWAKKPKLRPFSESPSNGKLTVSKSKPFTVRASGGELLGFAHDLFVGVGVGLPCTVMECGDIIYRSTLPRSNGLTLTVPGVALALGAVSYLWATPGVAPGFWDMFVLAFVERLFRTTYRKDDFVLGKKLGEGAFGVVYRVSLAKKPSSKKEGDLVLKKATEYGAVEIWMNERVRRACANSCADFLYGFLESSSKKGAEYWLIWRFEGEATLSDLMLSKDFPYNVEAMILGEVQDLPKGLERENRIIQTIMRQLLFALDGLHSTGIVHRDIKPQNIIFSEGSRTFKIIDLGAAADLRVGINYIPKEFLLDPRYTAPEQYIMSTQTPSAPSAPVAAALSPVLWQMNLPDRFDIYSTGLIFLQMAFPALRSDSNLI…	83.477	0	XP_018823681.1	PREDICTED: serine/threonine-protein kinase STN7, chloroplastic [Juglans regia]	77.06	0	sp|Q9S713|STT7_ARATH	Serine/threonine-protein kinase STN7, chloroplastic OS=Arabidopsis thaliana GN=STN7 PE=1 SV=1	At1g68830	879	0	KOG0594	Protein kinase PCTAIRE and related kinases	R	General function prediction only	K08282|1|3e-17|88.6|cme:CYME_CMS463C|non-specific serine/threonine protein kinase [EC:2.7.11.1]!K07760|2|9e-17|85.9|smo:SELMODRAFT_110637|cyclin-dependent kinase [EC:2.7.11.22]		GO:0005524//ATP binding;GO:0004672//protein kinase activity	GO:0016021//integral component of membrane
4639	PSS14090.1	Small ubiquitin-related modifier like [Actinidia chinensis var. chinensis]	11218.5	0.27	1	2	PSR94909.1	0.83	0.826|0.786|0.942|0.909|0.870|1.018|0.698|0.648|0.773	0.118	9	0.003623	PSS14090.1	MSATGGGGQEEDKKPTDQHINLKVKGQDGNEVFFRIKRSTQLRKLMTAYCDRQSVELSSIAFLFDGRRLRAEQTPDELEMEDGDEIDAMLHQTGGGHIGF	91.262	6e-60	CAN79327.1	hypothetical protein VITISV_032072 [Vitis vinifera]	86.73	8e-54	sp|Q9FLP6|SUMO2_ARATH	Small ubiquitin-related modifier 2 OS=Arabidopsis thaliana GN=SUMO2 PE=1 SV=1	At5g55160	162	2e-53	KOG1769	Ubiquitin-like proteins	O	Posttranslational modification, protein turnover, chaperones	K12160|1|2e-60|183|dcr:108210962|small ubiquitin-related modifier	GO:0016925//protein sumoylation	GO:0031386//protein tag	GO:0005634//nucleus
4647	PSS05920.1	Peptide methionine sulfoxide reductase [Actinidia chinensis var. chinensis]	22097.9	0.051	1	1	-	0.79	0.996|0.845|0.856|0.902|0.767|0.754|0.766|0.628|0.636	0.12	9	0.001479	PSS05920.1	MATHAIRSLNFQTNISSKARFDFHSTSHPSLAFRVLIKPRRGVSSSIRAMGSSASSQKPDNIQGQADNAAVRDEEWKKRLTGEQYYITRQKGTERPFTGEYWNTKTPGTYHCICCDTPLFESSTKFDSGTGWPSYYETVGNNVKSKLDLSIIFMPRQEVLCAACDAHLGHVFDDGPPPTGKRYCINSASLKLKPK	72.139	4e-103	KDO37774.1	hypothetical protein CISIN_1g028408mg [Citrus sinensis]	70.17	4e-87	sp|Q9C8M2|MSRB1_ARATH	Peptide methionine sulfoxide reductase B1, chloroplastic OS=Arabidopsis thaliana GN=MSRB1 PE=1 SV=1	At1g53670	254	7e-87	KOG0856	Predicted pilin-like transcription factor	O	Posttranslational modification, protein turnover, chaperones	K07305|1|1e-103|300|hbr:110656639|peptide-methionine (R)-S-oxide reductase [EC:1.8.4.12]	GO:0030091//protein repair;GO:0006979//response to oxidative stress	GO:0033743//peptide-methionine (R)-S-oxide reductase activity	GO:0009507//chloroplast
4669	PSS36363.1	Proteasome subunit beta type-6 like [Actinidia chinensis var. chinensis]	25501.8	0.283	1	1	-	0.76	0.853|0.783|0.882|0.841|0.782|0.854|0.624|0.554|0.624	0.122	9	0.000898	PSS36363.1	MDPSMADLNSPHSMGTTIIGVTYDGGVILGADSRTSTGMYVANRASDKITKLTDNVYLCRSGSAADSQIVSDYVRYYLHQHTIRLGQPATVKVAANLVRLISYNNKNMLQTGLIVGGWDKYNGGKIYGVPLGGTIIEQPFAIGGSGSTYLYGFFDQEWKDGMTKDEAEKLVVKAVSLAIARNGASGGVVRTVIINSEGVTRNFYPGDALPLWHEELEPQNSLLDILSSSSSSEPMVS	89.362	1e-155	XP_018845601.1	PREDICTED: proteasome subunit beta type-6 [Juglans regia]	85.15	1e-149	sp|Q8LD27|PSB6_ARATH	Proteasome subunit beta type-6 OS=Arabidopsis thaliana GN=PBA1 PE=1 SV=2	At4g31300	416	2e-149	KOG0174	20S proteasome, regulatory subunit beta type PSMB6/PSMB9/PRE3	O	Posttranslational modification, protein turnover, chaperones	K02738|1|3e-156|436|jre:109009542|20S proteasome subunit beta 1 [EC:3.4.25.1]	GO:0051603//proteolysis involved in cellular protein catabolic process	GO:0004298//threonine-type endopeptidase activity	GO:0005737//cytoplasm;GO:0005634//nucleus;GO:0005839//proteasome core complex
4724	PSS02624.1	Beta-adaptin-like protein [Actinidia chinensis var. chinensis]	15780	0.13	1	1	-	0.83	0.914|0.750|0.902|0.670|0.572|0.646|1.083|0.880|1.057	0.181	9	0.02397	PSS02624.1	MAIDDLLGLGLPVAPNPAPSPPLLKLNARAVLDPSTFQQKWRQLPISVSQEYSMNPQGVAALTTPQSLLQHMQGNSIQCIASGGQAPNFKFFFFAQKAESSSIFLVECVINSASCKAQLKIKADDQSTSQAFSALFQSALSTFGMT	75.51	9e-70	XP_021735609.1	beta-adaptin-like protein A [Chenopodium quinoa]	71.13	3e-60	sp|Q9LDK9|APBLA_ARATH	Beta-adaptin-like protein A OS=Arabidopsis thaliana GN=BETAA-AD PE=1 SV=1	At5g11490	199	5e-60	KOG1061	Vesicle coat complex AP-1/AP-2/AP-4, beta subunit	U	Intracellular trafficking, secretion, and vesicular transport	-	GO:0006886//intracellular protein transport;GO:0016192//vesicle-mediated transport	GO:0008565//protein transporter activity	GO:0030131//clathrin adaptor complex
4747	PSS18997.1	Leucine-rich repeat receptor-like protein kinase [Actinidia chinensis var. chinensis]	104816	0.028	2	2	-	0.83	0.889|0.777|0.883|0.880|0.775|0.854|0.855|0.729|0.826	0.057	9	4.15e-05	PSS18997.1	MMGSRVQVFLLVISIQILLVAAQTNEDFAVLKSLKDVWDNTPRNWEGSDPCGNGWVGIQCTNSRVTAITLGSIGLTGNLSGDLQLLSELQILDLSYNKGLTGPLPASIGSLKKLTNLILVGCGFSGPIPSAIGSLPRLLILSLTSNSFTGPIPPEIGHLSNLFWLDLADNMLSGRLPVSDGTTPGLDMLVNMKHFHFGKNQLAGTIPPKLFSPNMSLIHVLFEDNNFSGSIPSTLGLVQSLEVLRLDRNLLTGPVPSNLNNLVHVSELYLSNNQLSGSLPNLTGMNVLNYVDMSNNTFDESEIPLWFSTLQPLTTLKMENTQLKGQVPVSLFSLPLLQTVVLRNNQLNGTLDVGSSHSDQLQLIDFQNNFIVDYDEGGGFKNKLILAGNPICRETGQTK…	68.344	0	XP_019266169.1	PREDICTED: probable leucine-rich repeat receptor-like protein kinase At5g49770 isoform X1 [Nicotiana attenuata]	55.37	0	sp|Q9LT96|Y5977_ARATH	Probable leucine-rich repeat receptor-like protein kinase At5g49770 OS=Arabidopsis thaliana GN=At5g49770 PE=2 SV=1	At5g28680	290	4e-84	KOG1187	Serine/threonine protein kinase	T	Signal transduction mechanisms	K04733|1|0.0|1025|pxb:103928149|interleukin-1 receptor-associated kinase 4 [EC:2.7.11.1]		GO:0004674//protein serine/threonine kinase activity;GO:0032440//2-alkenal reductase [NAD(P)] activity;GO:0004709//MAP kinase kinase kinase activity;GO:0005524//ATP binding	GO:0016021//integral component of membrane;GO:0005622//intracellular
4752	PSR86546.1	Pheophorbide a oxygenase [Actinidia chinensis var. chinensis]	61138.6	0.041	1	1	-	0.74	0.792|0.884|0.676|0.729|0.821|0.613|0.723|0.793|0.605	0.095	9	9.322e-05	PSR86546.1	MALLLSTPPISTASPTTRSHLRPSLSLHPTKPSVLSPPRRRRILAPPQVAAPPATTIEEQQEHSKSAEIDIEESEERSSSKFSWRDHWYPVSLVEDLNPSLPTPFQLLNRDLVLWFDRSSSQWAAFDDKCPHRLAPLSEGRIDENGHLQCSYHGWSFDGCGSCTRIPQASLKGPEAQAVRSPRACATRFPTMVSQGLLFVWPDENGWERAHATKPPMLPDAFEKPEFSTVTIQRDLFYGYDTLMENVSDPSHIDFAHHKVTGRRDRAKPLPFKMESTGHWGFAGSNEGNPKISAEFIAPCYYMNKIEIDTKLPIVGDQKWVIWICSFNVPMAPGKTRSIVCSARNFFQFTMPGPAWWQVIPRWHEHWTSNKVYDGDMIVLQGQEKIFLSKLKEGSADVN…	77.941	0	XP_006487996.1	PREDICTED: pheophorbide a oxygenase, chloroplastic [Citrus sinensis]	70.39	0	sp|Q9FYC2|PAO_ARATH	Pheophorbide a oxygenase, chloroplastic OS=Arabidopsis thaliana GN=PAO PE=1 SV=1	-	-	-	-	-	-	-	K13071|1|0.0|885|cit:102625487|pheophorbide a oxygenase [EC:1.14.15.17]		GO:0010277//chlorophyllide a oxygenase [overall] activity;GO:0051537//2 iron, 2 sulfur cluster binding	-
4766	PSS13386.1	Purple acid phosphatase [Actinidia chinensis var. chinensis]	30678	0.199	5	6	-	0.77	0.802|0.901|0.888|0.671|0.833|0.703|0.647|0.818|0.685	0.097	9	0.0002288	PSS13386.1	MGKTADTLDVDFIISTGDNFYSNGLTDVHDPAFDESFTNVYTAPSLQKQWYAVLGNHDYRGDVLAQLSPILTQKDSRWLCLRSYRLDAEIAEFFFVDTTPFEDKYFDEPKGHTYDWRDVLPRKDYLSNLLKDVDSALSESRAKWKIVVGHHTIRSAGQHGDTVELVTNLLPILQANNVDLYINGHDHCLQHISSPDSPLQFLTSGGGSKAWRGDVSWWDPKEMKFYYDGQGFMTLQMTQTDVDFKFYDIFGNLLHKWRVTKSAYSAV	73.408	3e-153	XP_019236688.1	PREDICTED: purple acid phosphatase 3-like [Nicotiana attenuata]	66.28	1e-136	sp|Q8H129|PPA3_ARATH	Purple acid phosphatase 3 OS=Arabidopsis thaliana GN=PAP3 PE=2 SV=1	At1g14700	389	2e-136	KOG2679	Purple (tartrate-resistant) acid phosphatase	O	Posttranslational modification, protein turnover, chaperones	K14379|1|7e-154|435|pop:7471442|tartrate-resistant acid phosphatase type 5 [EC:3.1.3.2]		GO:0003993//acid phosphatase activity	-
4773	PSS34752.1	Receptor-like protein kinase [Actinidia chinensis var. chinensis]	56287.4	0.026	1	2	PSS34816.1;PSS34817.1	0.76	0.590|0.899|0.962|0.615|0.924|0.977|0.476|0.692|0.740	0.184	9	0.008055	PSS34752.1	MSDMAAKYTENAAASGAIPSEESCRCFSLSEIRTATNNFDDDSVIGIGGFGKVYKGSIDNGTITVAIKRKKDKSNQGATEFWTEVKMLSKLRHIHLVALIGYCNKRQEMILVYEYIAHGTLADHLYKKSREESGTSSPPLTWEQRLQICIGSARGLDYLHKGTHQTFIHRDVKTTNILLDEEWVAKISDFGLSKSTTSQSMTHVTTDVKGTLGYLDPDYYRTQQLTTKSDVYAFGVVLLEVLCGRPAVDEKLEEQRSLVLWAKHCIKKRKLHQIIDPLLIGQMSSQCLKLFGEVADHCLQERPEKRPTMAAVVESLENTLALHRKGKTEGIFTKMLKGMNQLWSGKGKYNNSKSERTLKLNDLKSSQVTVKGGFDPPKVDNEYKRTGKHALIVNQVPEK…	62.3	9e-125	CDP02334.1	unnamed protein product [Coffea canephora]	55.66	1e-119	sp|Q9SCZ4|FERON_ARATH	Receptor-like protein kinase FERONIA OS=Arabidopsis thaliana GN=FER PE=1 SV=1	At3g51550	372	2e-119	KOG1187	Serine/threonine protein kinase	T	Signal transduction mechanisms	K04733|1|2e-122|383|vvi:100246444|interleukin-1 receptor-associated kinase 4 [EC:2.7.11.1]	-	-	-
4811	PSS23533.1	THO complex subunit like [Actinidia chinensis var. chinensis]	61913	0.013	1	1	-	0.79	0.833|0.903|0.760|0.826|0.892|0.736|0.725|0.764|0.642	0.084	9	0.0001441	PSS23533.1	MEYGQSIVDGEVARGQIPRLLDIVLYLCEKEHVEAGMIFQLLEDLTEMSTMRNCEDIFGYIESKQDILGKPELFARGKLVMLRTCNQLLRRLSKANDVVFCGRIIMFLAHFFPLSERSAVNIKGVFNTSNETKYEKEAPEGISIDFNFYKTFWSLQEHFCNPASLTLAPTKWQKFTSSLTVVLNTFEAQPLSDEEGDANNIEDEAATFSIKYLTSSKLMGLELKDPSFRRHVLVQCLILFDYLKAPGKNDKDSPSEATKEEIKSCEERVKKLLEMTPPKGKEFLNSIEHILERERNWVWWKRDGCPPFEKPPIEKKSTQDGVKKRRIRWRLGNKELSQLWKWADQNPNALTDPQRVRTPAVTEYWKPLAEDMDVTAGIEAEYHHKNNRVYCWKGLRFSA…	87.109	0	XP_002264619.2	PREDICTED: THO complex subunit 1 isoform X1 [Vitis vinifera]	77.14	0	sp|Q93VM9|THOC1_ARATH	THO complex subunit 1 OS=Arabidopsis thaliana GN=THO1 PE=1 SV=1	At5g09860	801	0	KOG2491	Nuclear matrix protein	Y	Nuclear structure	K12878|1|0.0|994|vvi:100262610|THO complex subunit 1	-	-	-
4844	PSS24434.1	Zinc finger CCCH domain-containing protein [Actinidia chinensis var. chinensis]	72654.6	0.026	1	1	PSS09959.1	0.77	0.955|0.945|0.905|0.851|0.845|0.790|0.559|0.530|0.507	0.183	9	0.009106	PSS24434.1	MDAYEATRIVLSRIQNLDPENASKIMGLLLIQDHGEKEMIRLAFGPESLVHSVVLKARKDLGLASSSPNTPLSPLSHFLPNSLSRQNSSSSRLLPSPLSIPNHSWDASNCFSEFSTESIISPNSSLSSFPPLSSNSLNTSCALPFYGNGNGNTDLIDEFQLQDQLSFLNDGSPTLGPKSPDFFYPHHDLASDDSACGFGWKPCLYFARGYCKNGNSCRFLHGGAAADVGSDGGSMVGSPEQCHELLRSKSAHQQRLTFPYSALAANKCMNLLLQQQQSDSPRALLMGEDMHKFGRSRLDRNEFSMNPGSRQIYLTFPADSTFREEDVSNYFSIYGPVQDVRIPYQQKRMFGFVTFVYPETVKLILAKGNPHFVCDARVLVKPYKEKGKVPDKYRKLQQQ…	58.401	0	XP_017984581.1	PREDICTED: zinc finger CCCH domain-containing protein 53 isoform X1 [Theobroma cacao]	47.08	7e-167	sp|Q0D3J9|C3H53_ORYSJ	Zinc finger CCCH domain-containing protein 53 OS=Oryza sativa subsp. japonica GN=Os07g0682400 PE=2 SV=1	-	-	-	-	-	-	-	-	-	-	-
4854	PSS33070.1	Tripeptidyl-peptidase, partial [Actinidia chinensis var. chinensis]	42666.8	0.207	1	2	-	0.82	0.918|0.781|0.700|1.092|0.926|0.811|0.843|0.696|0.623	0.144	9	0.006463	PSS33070.1	MCSARQLFRQPFLSPSLLIDSKKLLRSSRPCRERNFGSRKGRIMVTRLSSSVNSTVDNGGLGKFKLNESTFLASLMPKKEIGADRFLEAHPQYDGRGVVIAIFDSGVDPAAAGLQVTTDGKPKVLDVIDCTGSGDIDTSNVVKADADGCISGASGASLVVNASWKNPSGEWHVGYKLVYEFFTDTLTSRLKKERKKKWDEKHQEAIAEAIKHLDEFDKKHVKVEEASLKRAREDLQNRVDFLRKQADSYDDKGPIIDAVVWHDGELWRVALDTQSLEDDPERGKLADFVPLTNYRIERKFGVFSSLDACSFVANVYDEGNVLSIVTDCSPHGTHVAGIATAYHPKEPLLNGVAPGAQLISCKIGDSRLGSMETGTGLIRALIAAVE	82.979	0	XP_017188444.1	PREDICTED: tripeptidyl-peptidase 2-like [Malus domestica]	80	0	sp|F4JVN6|TPPII_ARATH	Tripeptidyl-peptidase 2 OS=Arabidopsis thaliana GN=TPP2 PE=1 SV=1	At4g20850	489	1e-161	KOG1114	Tripeptidyl peptidase II	O	Posttranslational modification, protein turnover, chaperones	K01280|1|0.0|592|mdm:103437392|tripeptidyl-peptidase II [EC:3.4.14.10]		GO:0008240//tripeptidyl-peptidase activity;GO:0004252//serine-type endopeptidase activity	-
4857	PSS33697.1	Eukaryotic porin/Tom40 protein [Actinidia chinensis var. chinensis]	29491.1	0.428	2	6	-	0.83	0.887|0.972|0.760|0.866|0.847|0.777|0.819|0.830|0.732	0.073	9	0.0001887	PSS33697.1	MGKGPGLYSDIGKKARDLLYKDYHSDQKIIVTTYSPTGVAITSTGTKKGDLFIADVNTQLKNKNVTTDIKVDTNSSFFTTITVDEPAPGLKTILSFRVPDQRSGKLEVQYLHDYAGISTSVGLTANPIINFSGVVGTNAAALGTDVSFDSMTGCFTKCNAGLSFSNTDLIASLTLNDKGDTLSASYYHTVSPLTNTAVGGEVAHSFSTNENTITVGTQHSLDPLTMVKARVNNLGKASALIQHEWRPRSFFTLSGEVDTKAVDKSAKFGLALALKP	86.957	3e-178	XP_010087805.1	Mitochondrial outer membrane protein porin of 34 kDa [Morus notabilis]	84.78	1e-175	sp|P42055|VDAC1_SOLTU	Mitochondrial outer membrane protein porin of 34 kDa OS=Solanum tuberosum PE=1 SV=2	At3g01280	419	5e-149	KOG3126	Porin/voltage-dependent anion-selective channel protein	P	Inorganic ion transport and metabolism	K15040|1|3e-177|493|jre:109002589|voltage-dependent anion channel protein 2	GO:0055085//transmembrane transport	GO:0008308//voltage-gated anion channel activity	GO:0005741//mitochondrial outer membrane
4865	PSS23797.1	Uncharacterized protein CEY00_Acc08621 [Actinidia chinensis var. chinensis]	29343.3	0.039	1	2	-	0.74	0.871|0.654|0.787|0.738|0.569|0.651|0.917|0.682|0.810	0.114	9	0.0003271	PSS23797.1	MMISCKAVQTPFSLTKHALFHTRGLSHKKNNPPVLSLCKPKDSNSEDPPPEGDAQKQELLATIAMLQTEKVRVTDYLDERSAYLTEFAEKANAELEQIGENALKELEEASATIMENLDSSMQEFKESAELNKIEIEENEKQLAEFEGQIEKDRNEGLFFKNLRQMKPDEKAKAKEEMKKIKQLTIDRAGSKTRQNIYLALIGLLVIGIADSLISSSSGWQKVAILGLILVGLISQLIYEQKILLETERTVNEKIEEKKE	66.129	2e-111	XP_018811479.1	PREDICTED: uncharacterized protein LOC108984099 [Juglans regia]	-	-	-	-	-	-	-	-	-	-	-	-			GO:0016021//integral component of membrane
4884	PSR89521.1	Protein of unknown function DUF538 protein [Actinidia chinensis var. chinensis]	18212.2	0.096	2	3	-	0.78	0.801|0.658|0.918|0.766|0.639|0.855|0.827|0.667|0.922	0.109	9	0.0006851	PSR89521.1	MSSPALLSLLVLITISATATAETATAYDLLQEYNFPAGLLPQGVKGYELDASTGKFKVYLNGTCSFKAEGYDLKYKSTISGVISKGKIKNLNGISVKVIFLWFDITEVTRDGDDLNLSVGIASAQFGIDNFEESPQCGCGFDCVNVEREESVELRINRFVSSSILE	62.42	8e-68	XP_010259511.1	PREDICTED: uncharacterized protein LOC104598915 [Nelumbo nucifera]	30.39	8e-12	sp|Q9M015|Y5161_ARATH	Uncharacterized protein At5g01610 OS=Arabidopsis thaliana GN=At5g01610 PE=1 SV=1	-	-	-	-	-	-	-	-	-	-	-
4894	PSS12122.1	Protein CHAPERONE-LIKE PROTEIN OF like [Actinidia chinensis var. chinensis]	31054.3	0.051	1	1	-	0.68	0.900|0.637|0.630|0.783|0.562|0.533|0.859|0.590|0.582	0.136	9	0.0002152	PSS12122.1	MATALSVRPNRAILGHDPAGSHRARRLETGQIGKTAAAIRNDRWWLGPVSTPSRRALSTALLAGSRADDSAPFEMSVENALKLLGVSEGASFEDILRAKNSIIAACKGDKEMISQVEAAYDMLLMQSLSQRRAGKVVNSSVRYADVKPVNAPGMGSMPQWLQTTVKNPPVSFETPNTGDLGIQAGVYGALMVLNYVNGASTSSTVAYAGADVPGLILATSFGASLYFITRKNIKLGKATVITIGGLVAGAVVGSVVENWLQVDIVPFLGIHSPAVVVSEFILFSQFLVSLYLR	74.411	3e-150	XP_009783507.1	PREDICTED: uncharacterized protein LOC104232106 [Nicotiana sylvestris]	26.79	2e-12	sp|G5DBJ0|CPP1_NICBE	Protein CHAPERONE-LIKE PROTEIN OF POR1, chloroplastic OS=Nicotiana benthamiana GN=CPP1 PE=1 SV=1	-	-	-	-	-	-	-	-			GO:0031969//chloroplast membrane;GO:0016021//integral component of membrane
4896	PSS19858.1	Kinesin-like protein [Actinidia chinensis var. chinensis]	99455	0.022	1	1	-	0.6	0.918|0.824|0.528|0.668|0.672|0.387|0.564|0.485|0.310	0.197	9	0.00116	PSS19858.1	MVEINSPPPCPNTVTIRRNPHRRARATPSTQIPLPIPLSSVSPSSTLHQIPPFPIQDILSLEVPQNPNSDNLSISESPSQSESENLKVFLRVRPLALHHQNTGQTGKARTKNAWPQNPITKKASKPKSKKKSEICISVNDAHSVTLCPPKTLQDAKRIKTEVYEGFSHVFSSDSSQDEVFGKMVKPLVDDFLRGKSGMLAALGPSGSGKTHTVFGSPREPGMLPLALHQIFSRTEGCKNQLSRTFYLSMFEICSERGKAERILDLSPDVGDLSMQQSITKRLQEVAISDVQQAESLIARGMLKRATAMTNSNSQSSRSQCIINIRSTPNKMDKEVDLQSNSAVLTIVDLAGAEREKRTGNQGARLLESNFINNTSMVFGLCLRSLLEHQKNPKKPLQKH…	48.367	0	GAV56737.1	Kinesin domain-containing protein [Cephalotus follicularis]	49.76	6e-154	sp|F4HR11|KN6_ARATH	Kinesin-like protein KIN-6 OS=Arabidopsis thaliana GN=KIN6 PE=3 SV=2	At1g20060	476	2e-153	KOG0242	Kinesin-like protein	Z	Cytoskeleton	K10401|1|0.0|739|vvi:100252261|kinesin family member 18/19	-	-	-
4937	PSS15917.1	Small nuclear ribonucleoprotein like [Actinidia chinensis var. chinensis]	14751.7	0.229	3	5	-	0.79	0.900|1.021|0.791|0.881|0.888|0.785|0.660|0.645|0.567	0.146	9	0.004566	PSS15917.1	MGLWLFLKPNPILLGLSQSPITRTFSGFFWLQHTWDLGLRSALFLSLGFYTMSRSGQPPDLKKYMDKQLQIKLNANRMVVGTLRGFDQFMNLVVDNTVEVNGNDKTDIGMVVIRGNSVVTVEALEPVSRTQ	97.468	8e-50	XP_004494202.1	PREDICTED: probable small nuclear ribonucleoprotein G [Cicer arietinum]	93.67	4e-50	sp|O82221|RUXG_ARATH	Probable small nuclear ribonucleoprotein G OS=Arabidopsis thaliana GN=At2g23930 PE=3 SV=1	At2g23930	154	8e-50	KOG1780	Small Nuclear ribonucleoprotein G	A	RNA processing and modification	K11099|1|1e-50|159|cam:101515746|small nuclear ribonucleoprotein G	GO:0000387//spliceosomal snRNP assembly;GO:0000398//mRNA splicing, via spliceosome		GO:0043186//P granule;GO:0071011//precatalytic spliceosome;GO:0071013//catalytic step 2 spliceosome;GO:0097526//spliceosomal tri-snRNP complex;GO:0019013//viral nucleocapsid;GO:0071004//U2-type prespliceosome;GO:0005689//U12-type spliceosomal complex;GO:0005687//U4 snRNP;GO:0005686//U2 snRNP;GO:0005685//U1 snRNP;GO:0034719//SMN-Sm protein complex;GO:0005682//U5 snRNP;GO:0005681//spliceosomal comp…
4990	PSR89888.1	GABA transporter like [Actinidia chinensis var. chinensis]	50393.4	0.028	1	1	-	0.78	1.001|0.666|0.695|0.999|0.677|0.679|0.977|0.639|0.667	0.162	9	0.003485	PSR89888.1	MATLHPGSIADNEVEHHKVDPPPLQQKELDAGALFVLKSKGSWIHSGYHLTTSIVAPPLLSLPFAFASLGWVAGILCLVVGALVTFYSYNLISLVLEHHAHLGHRHLRFRDMARDILGPRWGKYYVGPIQFMVCYGAVVGSTLLGGQCMKAVYLLSNPNGSMKLYEFVMIFGSFMLILAQIPSFHSLRHINLVSLVLCLAYSTCATAGSVYIGSSSKGPEKDYSLNSDTETRVFGIFNAIAIIATTFGNGIIPEIQATLAPPVKGKMFKGLCVCYAVVTVTFFSVAISGYWAFGNQADGLILSNFLDGGKALVPKWFILMTNVFTIVQLSAVGVVYLQPTNEVLERTFSDPTSGEFSARNVIPRVISRSLSVITATIISAMLPFFGDINAVIGAFGFMP…	82.826	0	XP_017983841.1	PREDICTED: GABA transporter 1 [Theobroma cacao]	67.19	0	sp|F4HW02|GAT1_ARATH	GABA transporter 1 OS=Arabidopsis thaliana GN=GAT1 PE=1 SV=1	At1g08230	555	0	KOG1303	Amino acid transporters	E	Amino acid transport and metabolism	K14209|1|3e-156|454|lang:109349921|solute carrier family 36 (proton-coupled amino acid transporter)!K15015|3|9e-38|148|apro:F751_1778|solute carrier family 32 (vesicular inhibitory amino acid transporter)	GO:0003333//amino acid transmembrane transport	GO:0015171//amino acid transmembrane transporter activity	GO:0016021//integral component of membrane
4992	PSR98254.1	ADP-ribosylation factor GTPase-activating protein [Actinidia chinensis var. chinensis]	48758.5	0.042	1	1	-	0.8	0.794|1.015|1.072|0.526|0.684|0.691|0.684|0.846|0.892	0.175	9	0.01118	PSR98254.1	MAVASRRLRELQSQPGNKICVDCAQKNPQWASVSYGVFMCLECSGKHRGLGVHISFVRSVTMDSWSEIQLKKMEAGGNDRLNHFLTARGVPKETDIPSKYNSAAASVYRDRIQTLADGRPWRDPPVVKESVAKKPPLSGDGGRDSNSGVNSGWDSWDDGGFKSSSSADVRRNQSVGDFRSGGGGGGGVPARSRSTQDIYTRAELEASAANKESFFVMKMAENESRPEGVPPSQGGKYVGFGSSPAPVPRNNSQGDVLSAVTQGFGRLSMVAASAAQSAAVVVQAGTKDISSKVREGGYDTKVNETVNVVTAKTTEIGQKTWGIMKGVMALASKKVEEYTKEGVSWKADGWQQNGSESNGYYQNFSQESKGLSSGGQPSSGAHINSVSSGSWDDWNQKDN…	74.893	0	CDP06636.1	unnamed protein product [Coffea canephora]	63.48	0	sp|O80925|AGD7_ARATH	ADP-ribosylation factor GTPase-activating protein AGD7 OS=Arabidopsis thaliana GN=AGD7 PE=1 SV=1	At2g37550	549	0	KOG0704	ADP-ribosylation factor GTPase activator	TUZ	Signal transduction mechanisms;Intracellular trafficking, secretion, and vesicular transport;Cytoskeleton	K12492|1|0.0|662|nnu:104594590|ADP-ribosylation factor GTPase-activating protein 1		GO:0046872//metal ion binding;GO:0005096//GTPase activator activity	-
5044	PSS21751.1	Protein EARLY-RESPONSIVE TO DEHYDRATION 7 like [Actinidia chinensis var. chinensis]	47956.7	0.199	1	1	-	0.79	0.657|0.930|0.644|0.681|0.954|0.650|0.793|1.088|0.753	0.161	9	0.005077	PSS21751.1	MSSQIPKNSLYPQIDESNPEAITSSFSPSSSSIYPSVDVKDLAENLFPENESQQNPNSQTLESAEEVLVRVPGTIVHLIDKQQSIELASGELTVVRLRQGDNVVVVLARVGDEIQWPLAKDEAAVKLDESHYFFSLRVPAEARSEDENNNGEDFDAENLLNYGVTIASKGQEGVLEALDGVLKHYSAFSEERVSKVVDGSDVPRQTSPEEMETEEKNMVVEGVAAAYWTTLAPNVEDYSGGPARMIAAGSGQLIKGILWCGDVTADRLRWGNEFLKKRLGSGSNTEISPQAMKRMKRVKKLTKMSDKVATGILLGVVKVSGFFTSSIVNSTVGKKFFSLLPGEIVLASLDGFNKVCDAVEVAGRNVMSTTSVVTTGLVSQRYGEQARKVTHEGLGAAGH…	78.971	0	ACH87168.1	senescence-related protein [Camellia sinensis]	58.33	3e-178	sp|O48832|ERD7_ARATH	Protein EARLY-RESPONSIVE TO DEHYDRATION 7, chloroplastic OS=Arabidopsis thaliana GN=ERD7 PE=1 SV=1	-	-	-	-	-	-	-	K19366|1|0.0|613|vvi:100267615|spartin	-	-	-
5055	PSS10386.1	Plastid-lipid-associated protein [Actinidia chinensis var. chinensis]	34661.2	0.429	6	9	-	0.77	0.762|0.813|0.626|0.798|0.891|0.635|0.838|0.873|0.670	0.101	9	0.0003083	PSS10386.1	MAVATSFSQFSCNPVWVTEPRSQFNPKPALFLANSIRFAAFSTAATAERAKISVGSRRIIRVRAVSEDERGPERDAGDAVAVAEEERPTEVDLLKKQLVDSFYGTDRGLRATSETRAEIVELITKLEAMNPTPAPTDALTLLNGKWILAYTSFVGLYPLLSRAPPLVKVEEISQTIDSENFTVQNSVMLSGPLATTSISTNAKFEVQSPKRVQIKFEEGIISTPKLTDSIVLPENVEFLGQKIDLTPLKGIITSVQDTASSVAKTISSQPPLKFSISNSNAESWLLTTYLDKELRISRGDAGSVFVLLKDGCFLLTP	70.154	3e-151	XP_019171703.1	PREDICTED: light-induced protein, chloroplastic-like [Ipomoea nil]	67.89	2e-151	sp|Q9ZWQ8|PAP_CITUN	Plastid-lipid-associated protein, chloroplastic OS=Citrus unshiu GN=PAP PE=2 SV=1	-	-	-	-	-	-	-	-	-	-	-
5069	PSS17186.1	AT-rich interactive domain-containing protein [Actinidia chinensis var. chinensis]	49491.7	0.13	1	1	-	0.72	0.952|0.494|1.138|0.797|0.430|0.930|0.665|0.334|0.768	0.266	9	0.02028	PSS17186.1	MSEVEMEDVNRGGESPVGGQDTESEREEDSPDAAVADDPNSWPGEQDPIENGADKNQNNDKQVPEKEARQIEGLVNAAAEPDHDTAAAIAAAEGDAILNEPVTYSATQHNPFTPNSNAKSEDDSRETSKNWLTESVMEGDDESASPEDQSAFVKELESFYRERAMEFKPPKFYGQPLNLLKLWRAVIRLGGYDRVTGSKLWRQVGESFHPPKTCTTVSWTFRIFYEKALLEYERHKMQSGELQIAVAALPEPLSVENDAGGHQAPGSGRARRDAAARAMQGWHVQRLFGYGEVCEPIIKDKNFTNMPKREKSLKSIGSVKNKRPTEVEHAVKAARTETAKQLVTTVIDVGPPADWVKINVRETKDCFEVYALVPGLLREEVRVQSDPAGRLVITGQPEQ…	78.613	0	XP_011100020.1	AT-rich interactive domain-containing protein 5 [Sesamum indicum]	69.25	7e-149	sp|Q0WNR6|ARID5_ARATH	AT-rich interactive domain-containing protein 5 OS=Arabidopsis thaliana GN=ARID5 PE=1 SV=1	At1g76510	399	3e-135	KOG2744	DNA-binding proteins Bright/BRCAA1/RBP1 and related proteins containing BRIGHT domain	K	Transcription	-		GO:0003677//DNA binding	GO:0005634//nucleus
5086	PSR86909.1	Elongation factor P like [Actinidia chinensis var. chinensis]	27778.4	0.096	3	5	-	0.83	0.717|0.842|0.751|0.797|0.953|0.788|0.830|0.944|0.821	0.079	9	0.0002692	PSR86909.1	MRVARKPLSQALYYLASTSSSSSYSLKARTLNTCRRSQQSIQSPDHASRGVLASPWSATQLRGAKYRGSDVKPGNVIERKGRIYQVLKAQHTVQGRGGACIQVELRDVDSGNKTNERLRTDEAIEKVFVEEKPYTYLYTEDDFVVLSDPKTYDQLDVPKALFGEAAVYLKDDMKVTVQLYDQKPMSASVPQRVTCKVVEAQVPMKGIAATPHYKKVLLDNGLTVQVPAHVLAGDQIVINTSDNSYLTRA	64.341	1e-112	XP_009761657.1	PREDICTED: uncharacterized protein LOC104213808 [Nicotiana sylvestris]	-	-	-	-	-	-	-	-	-	-	-	K02356|1|5e-24|100|cme:CYME_CMK187C|elongation factor P!K01687|2|2e-23|103|cvr:CHLNCDRAFT_58991|dihydroxy-acid dehydratase [EC:4.2.1.9]		GO:0003746//translation elongation factor activity	GO:0005737//cytoplasm
5093	PSR98447.1	Chalcone synthase [Actinidia chinensis var. chinensis]	43041.1	0.201	2	4	-	0.82	0.958|0.808|0.834|0.853|0.774|0.734|0.914|0.694|0.818	0.083	9	0.00032	PSR98447.1	MVTVEEVRRAQRAEGPATVMAIGTATPPHCVDQSTYPDYYFRVTNSEHKAELKEKFQRMCDKSMIKKRYMYLTEEILKENPNVCAYMAPSLDARQDMVVVEIPKLGKEAAVKAIKEWGQPKSKITHLVFCTTSGVDMPGADYQLTKLLGLRPSVKRLMMYQQGCFAGGTVLRLAKDLAENNKGARVLVVCSEITAVTFRGPSDTHLDSLVGQALFGDGAAAVIVGADPIPEVEKPMFELVSAAQTILPDSDGAIDGHLREVGLTFHLLKDVPGLISKNIEKSLVEAFKPLGISDWNSLFWIAHPGGPAILDQVEQKLALKPEKLRATRHVLSEYGNMSSACVLFILDEMRKKSAEDGHKTTGEGLEWGVLFGFGPGLTVETVVLHSLCT	96.915	0	AGV53049.1	chalcone synthase [Actinidia chinensis]	94.86	0	sp|P48386|CHS1_CAMSI	Chalcone synthase 1 OS=Camellia sinensis GN=CHS1 PE=2 SV=1	-	-	-	-	-	-	-	K00660|1|0.0|776|jre:108988452|chalcone synthase [EC:2.3.1.74]	-	-	-
5099	PSS08336.1	Coiled-coil domain-containing protein [Actinidia chinensis var. chinensis]	17316.9	0.23	3	3	-	0.81	0.843|0.797|0.894|0.771|0.739|0.801|0.823|0.760|0.855	0.05	9	5.905e-06	PSS08336.1	MSGEEDSIEAAAAAAAAAAARRERLRALKAAQDLLNAPDDDHTDVNPNDQQDNLNMKFRNYLPHDKQLQEGKLAPPVLPKFEDPVAIVPVPEEKKEDPFVNIAPKKPNWDLRRDVQKKLDKLERRTQKAIFQLMEQQDKERQLTEEDGRIND	72.078	1e-69	XP_002263858.1	PREDICTED: coiled-coil domain-containing protein 12 [Vitis vinifera]	-	-	-	-	At3g05070	170	8e-55	KOG3407	Uncharacterized conserved protein	S	Function unknown	K12871|1|2e-70|212|vvi:100244142|coiled-coil domain-containing protein 12	-	-	-
5133	PSR96467.1	Protein CROWDED NUCLEI like [Actinidia chinensis var. chinensis]	10507.2	0.209	2	3	-	0.8	0.947|0.947|0.909|0.670|0.700|0.633|0.824|0.823|0.787	0.118	9	0.001851	PSR96467.1	MYSFYIAFWFGRWVLFCCCLGGGEGEAKPGGKKKFITRDEEPEQYWQTAGERKGENPMTTPIPYIIIFGMSTPFVILAIAFANGWIKVPVR	89.041	2e-42	XP_021685287.1	uncharacterized protein LOC110668387 [Hevea brasiliensis]	-	-	-	-	-	-	-	-	-	-	-	-			GO:0016021//integral component of membrane
5142	PSS34675.1	Chlorophyll a-b binding protein like [Actinidia chinensis var. chinensis]	31277.2	0.3	2	11	-	0.81	1.174|0.833|0.797|0.866|0.647|0.581|0.984|0.703|0.673	0.186	9	0.01216	PSS34675.1	MATATSAPTSSFIGTRLTGVRASSGPVQVQARFGFGKKKAAPKKAKSGPGTDRPLWYPGAKAPEYLDGSLVGDYGFDPFGLGKPAEYLQFDLDSLDQNLAKNLAGDVIGTRFETAEVKSTPFQPYSEVFGLQRFRECELIHGRWAMLATLGAITVEWLTGITWQDAGKVELIEGSSYLGQPLPFSITTLIWIEVLVIGYIEFQRNAELDEEKRLYPGGKFFDPLGLASDPEKKATLQLAEIKHARLAMVGFLGFAVQAAVTGKGPLNNWVTHLSDPLHTTIIDNVFS	89.455	3e-179	XP_016183928.2	chlorophyll a-b binding protein CP29.2, chloroplastic [Arachis ipaensis]	85.09	8e-172	sp|Q9XF88|CB4B_ARATH	Chlorophyll a-b binding protein CP29.2, chloroplastic OS=Arabidopsis thaliana GN=LHCB4.2 PE=1 SV=1	-	-	-	-	-	-	-	K08915|1|4e-180|501|cmos:111438232|light-harvesting complex II chlorophyll a/b binding protein 4	GO:0018298//protein-chromophore linkage;GO:0009765//photosynthesis, light harvesting	GO:0016168//chlorophyll binding	GO:0009535//chloroplast thylakoid membrane;GO:0009522//photosystem I;GO:0009523//photosystem II;GO:0016021//integral component of membrane
5175	PSR96509.1	Protein argonaute like, partial [Actinidia chinensis var. chinensis]	46617.7	0.175	2	3	-	0.76	0.927|0.618|0.826|0.864|0.596|0.753|0.885|0.574|0.776	0.133	9	0.00133	PSR96509.1	MPRKKKTELPGVGESSESQDVSGGRGGGAQRPPVQQQPQQQGGYPGGRRGWAPQTQQGGRGGYGGRSGGGPQRGGMAPQQHYGGPPEYQPEGRGAQPRGGPPQQRRGGTVIGARGSGPSAGGPSRPPVPELHQATQAPYPAKPAETHGEPSSSTLVPEPSLLQVTQQFQHISVQQEGSSSQAMQPVPPSSKSMRFPLRPGKGSTGIRCIVKANHFFAELPDKDLHQYDVSITPEVTSRGVNRAVMAQLVKLYRESHLGKRLPAYDGRKSLYTAGPLPFISNEFKITLIDEDDGSGGPRREREFKVVIKLAARADLHHLELFLQGRQADAPQEALQVLDIVLRELPTMRYCPVGRSFYSPDMGRRQPLGEGLESWRGFYQSIRPTQMGLSLNIDMSSTAF…	73.068	0	XP_010270729.1	PREDICTED: protein argonaute 1-like isoform X1 [Nelumbo nucifera]	63.68	1e-159	sp|Q6EU14|AGO1A_ORYSJ	Protein argonaute 1A OS=Oryza sativa subsp. japonica GN=AGO1A PE=2 SV=1	At1g48410	473	2e-157	KOG1041	Translation initiation factor 2C (eIF-2C) and related proteins	J	Translation, ribosomal structure and biogenesis	K11593|1|0.0|587|oeu:111410810|eukaryotic translation initiation factor 2C	GO:0031047//gene silencing by RNA	GO:0003676//nucleic acid binding	-
5196	PSS35964.1	Vesicle-associated protein 1-2, N-terminally processed like [Actinidia chinensis var. chinensis]	26499.6	0.164	1	1	-	0.77	0.565|0.691|0.911|0.589|0.795|1.013|0.616|0.769|1.011	0.174	9	0.005806	PSS35964.1	MSTGDLLSLEPQELQFPFELKKQISCSLQLSNKTDKYVAFKVKTTNPKKYCVRPNTGVVLPFSTCDVIVTMQAQKEAPPDMQCKDKFLLQSAVAHPGATTKDITPEMFNKESGNQVEECKLRVAYVPPPQPPSPVREGSEEGSSPRASVSDNGTVNTTEYTAVSRAQAEPQDNSSEVKALVSKLTEEKNSAIQQNNKLQQELELMRREGNKSRGGLPFLYIIVVGVIGIILGYILKRT	80.083	3e-145	XP_017982237.1	PREDICTED: vesicle-associated protein 1-2 [Theobroma cacao]	70.83	1e-114	sp|Q9SHC8|VAP12_ARATH	Vesicle-associated protein 1-2 OS=Arabidopsis thaliana GN=PVA12 PE=1 SV=1	At2g45140	328	2e-114	KOG0439	VAMP-associated protein involved in inositol metabolism	U	Intracellular trafficking, secretion, and vesicular transport	K04733|1|1e-79|251|hbr:110650629|interleukin-1 receptor-associated kinase 4 [EC:2.7.11.1]!K20547|3|5e-76|248|hbr:110639626|basic endochitinase B [EC:3.2.1.14]!K20222|4|1e-47|173|nsy:104217451|importin-5			GO:0016021//integral component of membrane;GO:0005789//endoplasmic reticulum membrane
5198	PSR94750.1	Protein of unknown function DUF538 protein [Actinidia chinensis var. chinensis]	18406.2	0.078	2	3	-	0.72	0.694|0.614|0.855|0.816|0.735|0.987|0.594|0.498|0.701	0.148	9	0.001049	PSR94750.1	MSSPAIHCVFLIVLIILSTSPSASGDDNLSAYQVLEEYDFPVGLLPTGVLGYELDTSTGKFKAYLNGSCSFTISDYKLKYKSTITGVISKDELKSLKGISVKVLFLWLNIAEVIRDGDEIEFSVGIASADFPVDSFVESPQCGCGFDCVSGGRKFSGFDRFVSYFLD	68.627	4e-69	EOX95123.1	Uncharacterized protein TCM_004684 [Theobroma cacao]	29.59	2e-11	sp|Q9M015|Y5161_ARATH	Uncharacterized protein At5g01610 OS=Arabidopsis thaliana GN=At5g01610 PE=1 SV=1	-	-	-	-	-	-	-	-	-	-	-
5206	PSR96577.1	Serine/threonine-protein kinase [Actinidia chinensis var. chinensis]	38800.8	0.067	1	1	-	0.8	0.848|0.720|0.790|0.858|0.730|0.776|0.925|0.760|0.833	0.067	9	4.194e-05	PSR96577.1	MGCSFSGLNALYGAMNGDGDVWINENRFRIVRQLGEGGLAYVFLVKEVLPESSAVSGAGIAKKCKDSSHVSDDGTYAMKKVLIQNTEQLELVREEIRVSSLFSHPNLLPLLDHAIIPVKSTQEGAWKHEAFLLFPVHLDGTLLDNAKAMKAKKEFFSTSDVLHIFWQLCAGLKHMHSLDPPYAHNDVKPGNVLITHRKGQSPLAILMDFGSARPARKQIRSRSEALQLQEWASEHCSAPFRAPELWDCPSHADIDERTDIWSLGCTLFAIMYGVSPFEYALEESGGRLQLAIVNAQIKWPAGPTPPYPEALHKFVTWMLQPQATVRPRIDDIIIHVDKLISKFSH	87.536	0	XP_010031327.1	PREDICTED: serine/threonine-protein kinase 16 [Eucalyptus grandis]	24.68	7e-12	sp|Q6H7U5|CIPKQ_ORYSJ	CBL-interacting protein kinase 26 OS=Oryza sativa subsp. japonica GN=CIPK26 PE=2 SV=1	At5g08160	613	0	KOG2345	Serine/threonine protein kinase/TGF-beta stimulated factor	KIT	Transcription;Lipid transport and metabolism;Signal transduction mechanisms	K08856|1|0.0|644|egr:104421163|serine/threonine kinase 16 [EC:2.7.11.1]		GO:0004674//protein serine/threonine kinase activity;GO:0005524//ATP binding;GO:0004672//protein kinase activity	-
5209	PSS09695.1	Enoyl-CoA hydratase [Actinidia chinensis var. chinensis]	33669.4	0.062	1	2	-	0.83	0.945|0.848|0.822|0.921|0.832|0.787|0.841|0.744|0.720	0.074	9	0.0001976	PSS09695.1	MVSLSLIARHCVGNSKPYLSQFFNPNSIPWQYRSIRTLLLQSASECLKLHRLSDADSGIVEVSLDRPTTKNAIGKDMLRELQHRFEAINRDSSANILMICSSVPKVFCAGADLKERKTMSPSEVQAFVNSLRSTFSYLEALCIPTIAVIEGAALGGGLEMALSCDLRICGEDAVLGLPETGLAIIPGAGGTQRLPRLVGRSVAKELIFTGRKVGGRDAVLMGLVNHCVPAGEAHLKALEIAREINQKGPLALRMAKRAIDEGLQADMTSALELEEDCYEELLNTKDRLEGLLAFAEKRKPKYTGE	73.457	4e-168	OVA10595.1	Crotonase superfamily [Macleaya cordata]	67.93	3e-139	sp|F4JML5|ECH2M_ARATH	Probable enoyl-CoA hydratase 2, mitochondrial OS=Arabidopsis thaliana GN=At4g16800 PE=2 SV=1	At4g16800	346	9e-121	KOG1679	Enoyl-CoA hydratase	I	Lipid transport and metabolism	K05607|1|2e-168|474|nnu:104598420|methylglutaconyl-CoA hydratase [EC:4.2.1.18]	GO:0008152//metabolic process;GO:0006635//fatty acid beta-oxidation	GO:0003824//catalytic activity;GO:0004300//enoyl-CoA hydratase activity	GO:0005739//mitochondrion
5246	PSS33893.1	Protein TIME FOR COFFEE like [Actinidia chinensis var. chinensis]	167559	0.01	1	2	-	0.78	0.542|0.544|0.739|0.636|0.730|0.876|0.824|0.942|1.208	0.211	9	0.01321	PSS33893.1	MDRNREARRGSFAATANGLPRRRHRSNSLRDSPEEDGPVEMHESTRLRDRVVKKDRERDRSSRSKRRRGDRLIHGSNREDGGEDSSEESVNDEEDDYDDGGGGAVRMLPPNPSISSSLPNHHHRKSFPPSGADKVFRPVQGWKPADGLNCFSVPRKARSASTKRSHECLVSGSGVTGEQIHRQASTSPVRPSLASTSTPSPAPVSPSSSTVSVRKKLKLNGSKPRPPKSSLKSSSSNPEELEIEIAEVLYGLMTQTQGSSKKEITVNDSPSFDPGELSKSSSDAKSRISSPISNSNSTAPQSASVLPQNSSPSPTPLSAVAPKRKRPRQVSDNLGGFSVRNSPISSTTVTMKTEIDQPPKTEISSPNPEKNPGSAAENGTVPHDFGGSQAVLPSSEPPQ…	58.988	0	XP_010649886.1	PREDICTED: protein TIME FOR COFFEE isoform X1 [Vitis vinifera]	42.45	0	sp|Q94KE2|TIC_ARATH	Protein TIME FOR COFFEE OS=Arabidopsis thaliana GN=TIC PE=1 SV=2	-	-	-	-	-	-	-	-	-	-	-
5260	PSR86900.1	IQ domain-containing protein [Actinidia chinensis var. chinensis]	71114.9	0.016	1	1	-	0.75	0.821|0.924|0.465|1.098|1.218|0.605|0.604|0.654|0.329	0.293	9	0.03024	PSR86900.1	MGISFSCPFAAENDLENSFDSVIVKSINFGNDGAKTLVRSISFKNRPTILESKGSGKMMIEGSVSLKITETDTNVSVEAPSPKEIDRFSKEMDNKKCPRTEKPILDLSNPKHEAALKLQKVYKSFRTRRKLADCAVLIEQSWWKLLDFAELKRSSISFFDIEKHETAISRWSRARTRAAKVGKGLSKNSRAQKLALQHWLEAIDPRHRYGHNLHFYYGKWLHSQSKEPFFYWLDIGEGKEVNLVEKCHRSKLQQQCIKYLGPMERQAYEVIVEDGKFLYKQTGELLDTTKGAKWIFVLSTSMTLYAGQKKKGSFQHSSFLAGGATSAAGRMVVEKGILKAVWPHSGHYRPTPENFQDFVSFLRGNNVDLTDVKMDPVDEDEETLSKQNSVFLRSISSEE…	66.118	0	GAV60507.1	hypothetical protein CFOL_v3_04037 [Cephalotus follicularis]	59.91	0	sp|Q9LHN9|IQM2_ARATH	IQ domain-containing protein IQM2 OS=Arabidopsis thaliana GN=IQM2 PE=2 SV=1	-	-	-	-	-	-	-	K04733|1|5e-115|374|han:110908553|interleukin-1 receptor-associated kinase 4 [EC:2.7.11.1]!K06892|2|2e-16|83.2|bna:106454088|feruloyl-CoA ortho-hydroxylase [EC:1.14.11.-]!K01214|3|3e-12|69.7|vra:111240847|isoamylase [EC:3.2.1.68]	-	-	-
5270	PSS17348.1	Tetratricopeptide repeat like superfamily protein [Actinidia chinensis var. chinensis]	23470.4	0.243	4	6	-	0.82	0.941|0.730|0.870|0.823|0.659|0.658|1.016|0.782|0.884	0.123	9	0.003141	PSS17348.1	MVTDILMQMGLILVSVFMFLLMYNVPQKAFAKLRSYRNKTATQSKRHFVLGAQLLSRAQSEAAQSESRSALAQSAAEEADKSIALDPHDAAAHILKALALDLQGFRTSALDSLDVALSPIAKKSLSSEEKGDALFKRAELKMGLSEQIDSAIADLVESVKLRSDSARVYSVLGECYEKKGLVEEAKKAYEEAVRVEPKWKVAREALERLGSVAN	64.623	9e-89	XP_004238010.1	PREDICTED: uncharacterized protein LOC101259041 [Solanum lycopersicum]	-	-	-	-	-	-	-	-	-	-	-	-			GO:0016021//integral component of membrane
5308	PSS21208.1	Thioredoxin-like protein [Actinidia chinensis var. chinensis]	27976.3	0.257	5	8	-	0.8	0.790|0.777|0.611|0.828|0.822|0.630|0.959|1.059|0.728	0.143	9	0.003928	PSS21208.1	MAMMMISLHNLPSKLPVSRSNQFFTSRAMSLPLRSTVTVRSPKSSAQIRSPLIARASSTAGFSENVSDVLGEVTIFTATGEPVMLKDLWDQNEGVAVVALLRHFGCFCCWELASALKESKPRFDSAGVKLIAVGVGTPNKARILAERLPFPLDCLYADPDRKAYDVLGLYYGLGRTFFNPASAKVFSRFESLKKSLTNYTLEGTPDDKSGVLQQGGMFVFKGKELLYARKDEGTGDHAPLDDIFNICCKVPVA	80.465	1e-129	CDP02631.1	unnamed protein product [Coffea canephora]	32.53	1e-29	sp|Q9ZUU2|AAED1_ARATH	Thioredoxin-like protein AAED1, chloroplastic OS=Arabidopsis thaliana GN=At2g37240 PE=1 SV=2	At5g65840	143	5e-42	KOG4498	Uncharacterized conserved protein	S	Function unknown	K10878|1|1e-19|92.4|zju:107432915|meiotic recombination protein SPO11!K15717|4|8e-13|69.3|gsl:Gasu_30200|prostamide/prostaglandin F2alpha synthase [EC:1.11.1.20]	GO:0055114//oxidation-reduction process	GO:0016209//antioxidant activity	-
5335	PSS32593.1	Methionine--tRNA ligase [Actinidia chinensis var. chinensis]	68922.8	0.103	5	9	-	0.82	0.935|0.809|0.865|0.844|0.762|0.759|0.855|0.763|0.770	0.061	9	3.327e-05	PSS32593.1	MAARLQFSIHNSLWFLSSSFSSPLHPFNSRGFHNLKNRLHFRPNPSRAALFCTCKSSNFPNAEASNDPFVLTTPLYYVNAPPHMGSAYTTIAADAIARFQRLLGKKVIFIAGTDEHGEKIATAAAARGSSPNEHCDVISQAYKALWEDLDIAYDKFIRTTDPKHEVIVKEFYSRVLANGDIYRADYEGLYCVNCEEYKDEKELLDNNCCPMHLKPCVLRKEDNYFFALSKYQTKLEETLSQNPDFVQPSFRLNEVQSWIKSGLRDFSISRASVDWGIPVPNDDKQTIYVWFDALLGYISAFLQEEQQANLQTAVSSGWPASLHLIGKDILRFHAVYWPAMLMSAGLSLPRMVFGHGFLTKDGMKMGKSLGNTLEPNDLVQRFGSDAVRYFFLREVEFGN…	78.56	0	XP_018814475.1	PREDICTED: methionine--tRNA ligase, chloroplastic/mitochondrial [Juglans regia]	75.4	0	sp|Q9M2T9|SYMM_ARATH	Methionine--tRNA ligase, chloroplastic/mitochondrial OS=Arabidopsis thaliana GN=OVA1 PE=2 SV=1	At3g55400	956	0	KOG0436	Methionyl-tRNA synthetase	J	Translation, ribosomal structure and biogenesis	K01874|1|0.0|1022|jre:108986349|methionyl-tRNA synthetase [EC:6.1.1.10]	GO:0006431//methionyl-tRNA aminoacylation	GO:0004825//methionine-tRNA ligase activity;GO:0005524//ATP binding	GO:0005737//cytoplasm;GO:0009570//chloroplast stroma;GO:0005739//mitochondrion
5401	PSS01624.1	Protein virilizer like [Actinidia chinensis var. chinensis]	121099	0.011	1	1	-	0.81	0.824|0.868|0.482|0.946|0.981|0.545|1.017|1.069|0.593	0.22	9	0.04012	PSS01624.1	MLRVFIVRIACLNADHVCILLRPIISLIHDRISESSSLLETDAYKVYRLLDFLATLLEHPRAKPLLLKEGAVQMLIRVLDRCISVTDSVEKQFCDSKNIDKCGFSQLTWCVPVFKCCSLISDSRTSVHHIGMYDRHDFGKLTPEDCSRILCYLLKLCKVLPVGRELFACLSTFKDLGSCSEGQRALLSMLLQIQSSRNEGYDSDGRQLFNAFEWRKSPPLLCCWITLLRSLDSKDVVPDYAIEAVAALSSGALRFCMDGKSLSSDRVAALKCLFGLPFDTSGTDDFPEENIKYIEDLTTLLSSKISDGKFPVDSNLNLILYQVIIDVQAKESAESLLLLLQKHTDSVKADEIISGACPSSSTDDTVSSKMHKIVDGSAGKAEDYNFVGLTDKFIWECPE…	62.433	0	XP_010653013.1	PREDICTED: uncharacterized protein LOC100246722 [Vitis vinifera]	-	-	-	-	At3g05680	660	0	KOG4822	Predicted nuclear membrane protein involved in mRNA transport and sex determination via splicing modulation	AT	RNA processing and modification;Signal transduction mechanisms	-	-	-	-
5418	PSR88023.1	BEL1-like homeodomain protein [Actinidia chinensis var. chinensis]	80869.5	0.03	2	2	PSS30795.1	0.67	0.698|0.565|0.742|0.757|0.626|0.785|0.671|0.524|0.689	0.088	9	1.939e-05	PSR88023.1	MGIAAEPLPSIISHPKGPIHIILGESNSANSMSQDYHNHPGIFSFSNGFDRSQQQQQHLIEQQIRRDKLGVQGFEPPPSLMAIEEEPGGLPGYESAGMLSEMFNFPPRAATATELLESQIPPNYRHARGREWYGRPGGFGPRENEGLHHGHPHPQQIPGINAESAAAMQLFLMNPQPRSPSSSPSHHHQPRPTPSTSSTLHMLLPNPSPTSNLQSFHHNPIGNSSPTGGHFGPNNSQFTWVPNSGHDEGNTTVQLNNEIGGIVEGQGLSLSLSSSLQRMEAVKAEELRMGDGGMLFFNQSGESSTSPYQLGGQNHQVHIGFGSSLGVVNVLRNSKYAKAAQELLEEFCSVGRGQFKKNKFGKHNTNNPNPNPSSSSGGSGSSASKDLPPLSAADRIEHQ…	64.933	0	XP_002269670.2	PREDICTED: BEL1-like homeodomain protein 2 [Vitis vinifera]	49.05	2e-180	sp|Q9SW80|BLH2_ARATH	BEL1-like homeodomain protein 2 OS=Arabidopsis thaliana GN=BLH2 PE=1 SV=3	At4g36870	491	4e-165	KOG0773	Transcription factor MEIS1 and related HOX domain proteins	K	Transcription	K16670|1|1e-80|268|bdi:100844103|homeobox protein Meis2!K15613|2|3e-64|230|han:110927075|homeobox protein Meis1	-	-	-
5424	PSS17840.1	Topless-related protein [Actinidia chinensis var. chinensis]	78407.1	0.11	1	1	-	0.81	0.846|0.676|0.923|0.746|0.602|0.791|0.963|0.746|1.017	0.137	9	0.004748	PSS17840.1	MSSLSRELVFLILQFLDEEKFKETVHRLEKESGFFFNMRYFEDAVTNGEWDDVEKYLSGFTKVDDNRYSMKIFFEIRKQKYLEALDKLDHAKAVEILVKDLKVFSTFNEDLFKEITFLLTLGNFRENEQLSKYGDTKSARAIMLVELKKLIEANPLFRDKLQFPTLKNSRLRTLINQSLNWQHQLCKNPKPNPDIKTLFVDHTCGQPNGARAPSPVTNPLMAMPKVGGFPPLGAHGPFQPATAPAPAPAPLGTSLGSWMVNPSSVPHQVVSAGPICISAPNNAAAAGTNVGVAGGNAPVTAMVAPNGDTRSLPDVKPRITDELEKPKIWKMTEINEPSQLRSLRLPDNLLSVRIIRLIYTNSGGSVLALAYNAVHKLWKWQRNERNLMGKATTSVPPQL…	79.31	0	XP_017257708.1	PREDICTED: topless-related protein 4 isoform X4 [Daucus carota subsp. sativus]	71.05	0	sp|Q27GK7|TPR4_ARATH	Topless-related protein 4 OS=Arabidopsis thaliana GN=TPR4 PE=1 SV=2	At3g15880	672	0	KOG0266	WD40 repeat-containing protein	R	General function prediction only	K22382|1|0.0|712|dcr:108221983|WD repeat-containing protein 26	GO:0006355//regulation of transcription, DNA-templated	-	-
5455	PSR99853.1	Centlein like [Actinidia chinensis var. chinensis]	37900	0.037	1	2	-	0.7	1.169|0.718|0.599|0.974|0.609|0.487|0.829|0.497|0.414	0.25	9	0.007088	PSR99853.1	MDLSQEIDDYIKESIEYSIGLPVSAHTLELKLRVSEEACNRLRGQCLYLQRRLREKDDVIDRSRAESSMNAQALKKFVEENQKLATECANLLSQCTRWEKECSLYDHDREALMEFGNEADERAKEAEIRVHELEEELRRMTEELQFYKHQCEMQSVDSSGEDLAMEQILLESLITTLVGNNEVAPTARAFLEANSGVEMCQRLLNTWNSLRPSTQKILALAAEVKTLQNNKEHLKINLTRAEEEVNILFEENKILDKENKRLLRLHKADEKHTSSASAKGNKRKSSPKMSSPIERKIDFCDVDSPRKPLSPLQHNSSPESRMHKK	67.477	6e-157	XP_009770628.1	PREDICTED: centlein isoform X3 [Nicotiana sylvestris]	-	-	-	-	-	-	-	-	-	-	-	-	-	-	-
5473	PSS06340.1	Transcription factor like [Actinidia chinensis var. chinensis]	30144.3	0.046	1	1	PSR86103.1;PSR92779.1;PSR94831.1;PSS33818.1;PSS36158.1;PSS21030.1;PSS08104.1;PSS13933.1	0.81	0.700|0.946|0.939|0.840|1.064|1.125|0.477|0.597|0.592	0.228	9	0.03582	PSS06340.1	MANNPSDGPSDDFLDQILGFSNYAAATADNNLAANDAGLAATAVPMMLQIISGDGSAHLGGGGGGFQGAGFPLGLSLDQGKRFREDVVDGRASSSSVKNAFPGQPMPSTVAVVPHPPAIRPRVRARRGQATDPHSIAERLRRERIAERIRALQELVPSVNKTDRAAMLDEIVDYVKFLRLQVKVLSMSRLGGAGAVAPLVTDIPISSVEEEGSEGGSNQPAWEKWSNDGTERQVAKLMEENVGAAMQLLQSKALCIMPISLASAIYHTQPPETTPVVKSEAHPPS	77.888	4e-152	XP_015891470.1	PREDICTED: transcription factor UNE12 [Ziziphus jujuba]	67.1	7e-118	sp|O22768|UNE12_ARATH	Transcription factor UNE12 OS=Arabidopsis thaliana GN=UNE12 PE=2 SV=2	-	-	-	-	-	-	-	K12126|1|3e-19|84.3|smo:SELMODRAFT_114141|phytochrome-interacting factor 3!K11253|4|1e-17|84.0|pop:18096237|histone H3	GO:0006366//transcription from RNA polymerase II promoter	GO:0046983//protein dimerization activity;GO:0001228//transcriptional activator activity, RNA polymerase II transcription regulatory region sequence-specific DNA binding;GO:0001046//core promoter sequence-specific DNA binding	GO:0005634//nucleus
5500	PSR89783.1	Tetratricopeptide repeat protein like [Actinidia chinensis var. chinensis]	82231.6	0.018	1	1	-	0.81	1.053|0.897|0.782|0.945|0.830|0.713|0.770|0.674|0.587	0.144	9	0.00488	PSR89783.1	MSKNRIEERRRAQITRKLGRIMQCLCSGEQLRADEMAPSTESLAMKDYAVSGYTSNDGEINQRPDTGNIEEAESSLRESGCLNYEEARALLGRYEFQKGNVEAALHVFEGIDIAAVTPKMRLVLGRRGERQMRWSQSEATPPMSIHAVSLLLEAVYLKAKSLQALGRYKEAAQSCKVILDLVESTLPEGLPENFGADCKLQETLNKAIELLPELWKLADSPHEAILSYRRALLYNWHLDAETTAKIQKEFAIFLLYSGGEASPPNLRSQMDSSFVPRNNIEEAILLLMILLRKISLKRIDWDPSIMDHLSYALSVSGDLRALANQVEELLPGIMDRKDAYLTLSLCYYGDGEDLTALDLLRKLLSSGQDPHCVPALLMASKICGENPRYAEEGINFAQR…	73.497	0	XP_018827238.1	PREDICTED: tetratricopeptide repeat protein 7A-like [Juglans regia]	58.83	0	sp|Q66GN3|NPGR2_ARATH	Protein NPGR2 OS=Arabidopsis thaliana GN=NPGR2 PE=1 SV=1	At4g28600	713	0	KOG4162	Predicted calmodulin-binding protein	T	Signal transduction mechanisms	K21843|1|0.0|1106|jre:108995987|tetratricopeptide repeat protein 7	-	-	-
5518	PSS28974.1	Sucrose-phosphate synthase [Actinidia chinensis var. chinensis]	120609	0.028	1	1	-	0.83	0.830|0.834|0.831|0.898|0.900|0.876|0.785|0.766|0.761	0.053	9	2.278e-05	PSS28974.1	MAGNEWINGYLEAILDSGAAAIEDQSKPIPVNLRERGNFNPTKYFVEEVVTGVDETDLHRTWIKVVATRNTRERSSRLENMCWRIWHLTRKKKQLEWEDFQRMAHRRWEREQGRRDATEDMSEDLSEGEKGDVLGETMVNESPRKKFQRNFSNLEVWSDNNKEKKLYIVLISLHGLVRGENMELGRDSDTGGQIKYVVELARALARMPGVYRVDLFTRQISSPEVDWSYGEPTEMLTAGADDDADVGESSGAYIVRIPFGPRDKYMRKELLWPYIQEFVDGALAHILNMSKALGEQIGGGQPVWPYVIHGHYADAGDSAALLSGALNVPMVLTGHSLGRNKLEQLLKQGRQSKEDINSTYKIMRRIEAEELSLDVAELVITSTKQEIDEQWGLYDGFDV…	84.363	0	XP_008222839.1	PREDICTED: probable sucrose-phosphate synthase 3 [Prunus mume]	78.84	0	sp|O04933|SPSA2_CRAPL	Probable sucrose-phosphate synthase 2 OS=Craterostigma plantagineum GN=SPS2 PE=2 SV=1	At1g04920	1677	0	KOG0853	Glycosyltransferase	M	Cell wall/membrane/envelope biogenesis	K00696|1|0.0|1897|pmum:103322685|sucrose-phosphate synthase [EC:2.4.1.14]	GO:0005985//sucrose metabolic process	GO:0046524//sucrose-phosphate synthase activity;GO:0016157//sucrose synthase activity	-
5523	PSR95547.1	hypothetical protein CEY00_Acc21594 [Actinidia chinensis var. chinensis]	45703.4	0.078	1	1	-	0.74	0.802|0.575|0.691|0.877|0.669|0.753|0.893|0.652|0.783	0.106	9	0.0002312	PSR95547.1	MESPQSVVSPSVYSEPEKPNFTSFLSKGHEVQSKETDLKDTIGVLEVYIHEARDIQNICIYHKQDVYAKIYLTSDPENTVSTQTINGGGKNPVFNEKLRLNVWTIDSSLKCEIWMLSRVRNYLEDQLLGFALVPMSEVLIKNGKLEKEFSLSSTDLFHSPAGFVQLSLLYSGASPEVIELPSLPAAETKVVRDSELTESLPSELDKIEFPDPKIVNENNMMLSEYFGIQCTDMDSQSSESLVTSDTENQLSSEIGIRVVERFSTGTIESIPKHDSPPSSVSTNGFPSVSVLANSESYETPGASKSPNEEYVSPPKENPNGKREDVGDAESVDSFAKPTVTVNIEPEPKMVQQDIVDMYMKSMQQFTESLAKMKLPMDIESGPPSSESSSSDQKLPASKN…	66.975	0	XP_016702652.1	PREDICTED: uncharacterized protein LOC107917825 [Gossypium hirsutum]	31.68	6e-07	sp|O04133|SRC2_SOYBN	Protein SRC2 OS=Glycine max GN=SRC2 PE=2 SV=1	-	-	-	-	-	-	-	K00895|1|7e-16|84.0|dct:110098534|diphosphate-dependent phosphofructokinase [EC:2.7.1.90]	-	-	-
5525	PSR87772.1	ATP synthase subunit beta precursor [Actinidia chinensis var. chinensis]	59564.2	0.622	1	2	-	0.78	0.894|0.766|0.775|0.690|0.613|0.585|0.990|0.842|0.849	0.132	9	0.001878	PSR87772.1	MASRRLLSSLLRSSLQRSPSKSAFRVPSPRPTHRPSPAGFLLNRAVDFATSAAAPSPPHTPPPKTSGPSGKITDEFTGAGAIGKVCQVIGAVVDVRFDEGLPPILTALEVLDNSIRLVLEVAQHLGENMVRTIAMDGTEGLVRGQRVLNTGSPITVPVGRATLGRIMNVIGEPIDERGDIKTDHYLPIHREAPAFVEQATEQQILVTGIKVVDLLAPYQRGGKIGLFGGAGVGKTVLIMELINNVAKAHGGFSVFAGVGERTREGNDLYREMIESGVIKLGEKQSESKCALVYGQMNEPPGARARVGLTGLTVAEHFRDAEGQDVLLFIDNIFRFTQANSEVSALLGRIPSAVGYQPTLATDLGGLQERITTTKKGSITSVQAIYVPADDLTDPAPATT…	92.626	0	XP_004238867.1	PREDICTED: ATP synthase subunit beta, mitochondrial-like [Solanum lycopersicum]	91.41	0	sp|P17614|ATPBM_NICPL	ATP synthase subunit beta, mitochondrial OS=Nicotiana plumbaginifolia GN=ATPB PE=1 SV=1	Hs4502295	773	0	KOG1350	F0F1-type ATP synthase, beta subunit	C	Energy production and conversion	K02133|1|0.0|1036|sly:101261919|F-type H+-transporting ATPase subunit beta [EC:7.1.2.2]	GO:0015986//ATP synthesis coupled proton transport	GO:0005524//ATP binding;GO:0046933//proton-transporting ATP synthase activity, rotational mechanism	GO:0000275//mitochondrial proton-transporting ATP synthase complex, catalytic core F(1)
5550	PSR99531.1	Translation initiation factor IF-2 like, partial [Actinidia chinensis var. chinensis]	19725.5	0.088	1	1	-	0.65	0.509|1.149|0.305|0.572|1.248|0.333|0.472|1.017|0.269	0.381	9	0.01784	PSR99531.1	MAEEHHHHHHHHHHHHPEEKSDVCETTTVPAVEDTDRGLFGFMGKKEEEKKHEEEVMVTEFEKIHVSEPKEEKKPGLLEKLHRSDSRSSSSGDEEEGEKRKKKGLKQNILGEKKEDTSVPFEKCEEPAPVEEKKGFPFEKCQEPAPVEEKKGFPFEKCQEPAPVVGEEGL	44.706	2e-15	XP_021614140.1	dehydrin ERD14 [Manihot esculenta]	58.18	4e-09	sp|P42763|ERD14_ARATH	Dehydrin ERD14 OS=Arabidopsis thaliana GN=ERD14 PE=1 SV=1	-	-	-	-	-	-	-	-	GO:0006950//response to stress;GO:0009415//response to water	-	-
5558	PSS36105.1	Methyl-CpG-binding domain-containing protein [Actinidia chinensis var. chinensis]	34590	0.118	2	5	-	0.82	0.831|0.755|0.922|0.873|0.807|0.861|0.792|0.700|0.795	0.066	9	6.374e-05	PSS36105.1	MASSVEVEVFSLELPAPLGWTKKFMPKKAGTPKKNEIIFTAPTGEEISNRKQLEQYLKSHPGGPTMSEFDWGTGETPRRSTRISEKAKAAPPPESEPTKKRSKKSPASKDKKEEVAPEETEVVKEVDVQVEKTEKENTDEEIEKNVVKETKDEPHNTDGKAKDTPKEAKLGQDVKMPDAEECKKNGEAEGENPKEAEVEKVTDGSEVAQNDNGKAEDAEDEEKLEQPSLEGEKKDGPNEQDKPDTGITEEKKCQMEVEEKAEEKGTALGSETETHEKEAVDKKIKEQNKSSDNDTSKKAEGAVIENGGLGREP	54.747	2e-81	XP_002285323.1	PREDICTED: methyl-CpG-binding domain-containing protein 11 isoform X1 [Vitis vinifera]	67.96	4e-43	sp|Q9LW00|MBD11_ARATH	Methyl-CpG-binding domain-containing protein 11 OS=Arabidopsis thaliana GN=MBD11 PE=1 SV=1	-	-	-	-	-	-	-	K02213|1|7e-16|82.8|ppp:112294962|cell division control protein 6		GO:0003677//DNA binding	GO:0005634//nucleus
5567	PSS32796.1	Glycine-rich RNA-binding protein [Actinidia chinensis var. chinensis]	15387.3	0.469	2	3	-	0.78	0.767|0.910|0.614|0.859|0.996|0.679|0.730|0.854|0.577	0.14	9	0.002345	PSS32796.1	MAFLNRFGSLMRQTIAQNSASNGHVPMASMLNAIRSMSSSKLFIGGLSYGTDDQSLKDAFSGFGDVVDAKVITDRETGRSRGFGFVSFASDESAGSAMSAMDGQPLNGRNIRVSYATDRPAAPRGNFGGGGGGYRGGYGDARENDSF	70.229	2e-58	XP_011042176.1	PREDICTED: glycine-rich RNA-binding protein 2, mitochondrial-like [Populus euphratica]	65.32	1e-50	sp|Q9SVM8|RBG2_ARATH	Glycine-rich RNA-binding protein 2, mitochondrial OS=Arabidopsis thaliana GN=RBG2 PE=1 SV=1	At4g13850	159	2e-50	KOG0118	FOG: RRM domain	R	General function prediction only	K13186|1|1e-53|170|gab:108474743|RNA-binding protein 3!K13195|4|3e-48|156|dct:110093117|cold-inducible RNA-binding protein!K12741|5|3e-46|155|nta:107787039|heterogeneous nuclear ribonucleoprotein A1/A3		GO:0003723//RNA binding	-
5569	PSS19687.1	Symplekin like [Actinidia chinensis var. chinensis]	146209	0.01	1	1	PSS17323.1	0.82	0.737|0.773|0.877|0.763|0.812|0.899|0.781|0.815|0.924	0.065	9	6.012e-05	PSS19687.1	MSGPSREQALSLLAQANNHGDLAVKLSSLKQAKDILASCGPSLAAELFPYLVELQYSPEARVRKSLVEAVEEIVLKAMEHSAVLMPVLFALLHDNDSIVARQSIVSGTRIFCSILLELSLQFHRRGIVERWLEELWTWMLKFKDAVFGNLWEAGSTGTKLLALKFLETFILLFTPDSSGSEKLFTEAITRSEPAFNISWLVGGHPVLDPVALTSEANRSLGILLDLLGSASGLPGPLAISVFNCLAAIARKRPLLYNSVLSALLNFEPNFEAAKGGHIASIQYSLRTAFLGFLRCTYPAIMESRDTLLRTLRGMNAGDAADQVIRQVDKMMKNNERAARDARLTKDDQLSNQLPTAGDAVRKRSMPLENEEPDNGHGVASKRINCGPHTHSDLPVQKSD…	67.189	0	XP_020416025.1	uncharacterized protein LOC18789207 isoform X1 [Prunus persica]	-	-	-	-	At1g27595	970	0	KOG1895	mRNA cleavage and polyadenylation factor II complex, subunit PTA1	A	RNA processing and modification	K06100|1|0.0|1756|pper:18789207|symplekin	-	-	-
5594	PSS05887.1	Ultraviolet-B receptor like [Actinidia chinensis var. chinensis]	47132	0.086	3	3	-	0.79	0.564|0.740|0.906|0.686|0.894|1.077|0.592|0.746|0.916	0.169	9	0.007637	PSS05887.1	MMMMRAVRRVVTGVRGGGRWIRIRSKHTVVMSFGDGSQGALGLPTSAVGMGGDAYEPTAVPGLPPDVSNISAGHYHSLAVTSQGEVWSWGRNHEAQLGRGLLAPRESWNEPKRVEGLAQVKVRATFASGVISAAIGDDGSLWVWGKSKRGQLGLGKGITESVSPSKVEALVGEEIVKVSLGWGHALAQTKDGKLFGWGYSADGRLGHMGKPLERSPLDSSGDTSKATQLSSSTLEVAEKLVLDAMDKEKDMPITWEPHLIEEVRDFEVVDVACGLDHSLVLCCDRTLLSSGSNIYGQLGRAIQDLGMLPVDMKLQPVSIASGLGHSLAICQIGRLGGTGDNTGIVSWGWNQSSQLGREGPENLPLVVEGLAGENLISVSGGRAHSIALTSKGKVWVWGS…	72	0	XP_002320544.2	hypothetical protein POPTR_0014s17080g [Populus trichocarpa]	27.97	8e-32	sp|Q9FN03|UVR8_ARATH	Ultraviolet-B receptor UVR8 OS=Arabidopsis thaliana GN=UVR8 PE=1 SV=1	At5g48330	528	0	KOG1426	FOG: RCC1 domain	S	Function unknown	K10614|1|1e-32|133|cann:107852991|E3 ubiquitin-protein ligase HERC3 [EC:2.3.2.26]	-	-	-
5615	PSS26926.1	Myb-related protein [Actinidia chinensis var. chinensis]	18724.2	0.043	1	3	-	0.83	0.954|1.160|1.050|0.677|0.824|0.726|0.628|0.739|0.668	0.188	9	0.01835	PSS26926.1	MIIQLHSRYGNRWSKIASHFPGRTDNEIKNCWNTRIKKKLKVLGLDPVTHKPIEQSGVFSAKDKGVLESNSSRNQENNFELNLQDNRGSRDDEMPQREGKSNIGQQFNEIWGCLDVGSSAISQTKPSNAFYAGMSEDFPQHWIDSPNNLLLWDDFNNLEGIFL	44.681	6e-41	XP_002298589.1	hypothetical protein POPTR_0001s36220g [Populus trichocarpa]	35.71	4e-23	sp|P81394|MYB15_ANTMA	Myb-related protein 315 OS=Antirrhinum majus GN=MYB315 PE=2 SV=1	At1g66230	92.4	8e-23	KOG0048	Transcription factor, Myb superfamily	K	Transcription	K09422|1|1e-41|144|pop:7456205|transcription factor MYB, plant	GO:0030154//cell differentiation;GO:0006357//regulation of transcription from RNA polymerase II promoter	GO:0043565//sequence-specific DNA binding;GO:0044212//transcription regulatory region DNA binding;GO:0001135//transcription factor activity, RNA polymerase II transcription factor recruiting;GO:0003677//DNA binding;GO:0000981//RNA polymerase II transcription factor activity, sequence-specific DNA binding	GO:0005634//nucleus
5634	PSS06149.1	Chloroplastic lipocalin like [Actinidia chinensis var. chinensis]	37883.6	0.245	6	13	-	0.8	0.829|0.851|0.707|0.825|0.848|0.686|0.900|0.889|0.706	0.083	9	0.0002266	PSS06149.1	MVHHHGAVRSSPLVLQPHSRPIARGMPAKIMFKCSGEKRLSSRAMTRHVLSGLAASCIFLSQTSQVVAGDISAHQNLCQLATATDNVLTLPLDEGSDGRMMMMRGMTAKDFDPIRYSGRWFEVASLKRGFAGQGQEDCHCTQGVYTFDKTAPGIQVDTFCVHGGPDGYITGIRGKVQCLPEEDLEKNETDLEKQEMIKVKCFLRFPTLPFIPKEPYDVIGTDYDNYAIVSGAKDRSFIQIYSRTPDPGPEFIEKYKSYLENFGYDPSKIKDTPQDCEVMSNSQLAAMMSMNAMQQALTNQFPNLELNAPVEFNPFTSVFDTLKKLVELYFKQLTG	76.119	0	XP_010644414.1	PREDICTED: chloroplastic lipocalin [Vitis vinifera]	70.49	7e-152	sp|Q9STS7|CHL_ARATH	Chloroplastic lipocalin OS=Arabidopsis thaliana GN=CHL PE=1 SV=1	At3g47860	430	1e-151	KOG4824	Apolipoprotein D/Lipocalin	M	Cell wall/membrane/envelope biogenesis	K03098|1|1e-07|55.8|soe:110777382|apolipoprotein D and lipocalin family protein	-	-	-
5648	PSS07362.1	Inorganic pyrophosphatase [Actinidia chinensis var. chinensis]	31125.5	0.037	1	2	-	0.66	0.539|0.896|0.487|0.541|0.897|0.476|0.604|0.975|0.526	0.201	9	0.001502	PSS07362.1	MAGIVAVFDFDKTIIDLDSDNWVVDELGFTDLFNQLLPTMPWNTLMDTMMKELHSQGKTTDDIVEVLKRVPIHPRIIPAIKAAHALGCELRIVSDANLFFIETIVKHLGLSDYFSEINTNPSYVDEEGRLRIFPYHDFHSSPHGCNLCPPNMCKGMIMERIQASVASEGKKKFIYLGDGSGDFCPSLKLREGDHVMPRKDYPLWDLICKNRPHVKAEIHEWSDGEDLESVLLQLINTISMEEANKLFAVECKFETIPMAAHEALPQALSVPH	77.656	5e-163	CDO97931.1	unnamed protein product [Coffea canephora]	64.39	2e-129	sp|Q67YC0|PPSP1_ARATH	Inorganic pyrophosphatase 1 OS=Arabidopsis thaliana GN=PS2 PE=1 SV=1	At1g73010	369	3e-129	KOG3120	Predicted haloacid dehalogenase-like hydrolase	R	General function prediction only	K13248|1|4e-162|454|jcu:105631487|pyridoxal phosphate phosphatase PHOSPHO2 [EC:3.1.3.74]		GO:0016791//phosphatase activity	-
5659	PSS07604.1	Succinate dehydrogenase assembly factor 2 like [Actinidia chinensis var. chinensis]	20821.6	0.295	4	6	-	0.81	0.698|0.837|0.702|0.747|0.937|0.707|0.860|0.997|0.836	0.108	9	0.001194	PSS07604.1	MGNLRRAMLTVSRILNSTAVNGGTTVPKLLIHSETLSRPFYGSFSRFCSYNQSVDVDLSSEESKRRLFNRLLYRSKQRGFLELDLVLGKWVEDHIHSMDENGIRSLVDVLDLENPDLWKWLSGQEQAPEPVIANPVFSALREKVMNNLDNHAAPETRATPGQPWVRGWDDFKKAKNSPITGNQ	70.968	3e-93	AKM76896.1	ankyrin repeat family protein [Pelargonium australe]	59.04	4e-76	sp|Q9FI44|SDAF2_ARATH	Succinate dehydrogenase assembly factor 2, mitochondrial OS=Arabidopsis thaliana GN=SDHAF2 PE=1 SV=1	At5g51040	226	7e-76	KOG3326	Uncharacterized conserved protein	S	Function unknown	K18168|1|1e-25|100|cvr:CHLNCDRAFT_137510|succinate dehydrogenase assembly factor 2	-	-	-
5693	PSR89758.1	Vacuolar protein sorting-associated protein [Actinidia chinensis var. chinensis]	23200.9	0.047	1	1	PSR89792.1	0.83	0.781|0.900|1.045|0.751|0.865|0.991|0.637|0.714|0.828	0.131	9	0.006516	PSR89758.1	MNIFAKKPSPKETLRESKREMANATRGIEREITTLQLEEKKLVAEIKRTAKTGNEAATKILARQLIRLRQQIAKLQSSRAQMRGIATHTQAMSAQSSVAVGMKGASKAMEAMNKQMAPAKQAKVILEFQKQSAQMDMTTEMMSDAIDDALDNDEAEDETEELTNQVLDEIGVDVASQLSAAPKGRIAGKTTEDVSSSGMNELEKRLAALRNP	87.264	3e-131	XP_012829060.1	PREDICTED: vacuolar protein sorting-associated protein 2 homolog 3-like [Erythranthe guttata]	81.43	5e-123	sp|Q941D5|VPS2C_ARATH	Vacuolar protein sorting-associated protein 2 homolog 3 OS=Arabidopsis thaliana GN=VPS2.3 PE=2 SV=1	At1g03950	328	2e-115	KOG3230	Vacuolar assembly/sorting protein DID4	U	Intracellular trafficking, secretion, and vesicular transport	K12192|1|1e-134|380|dzi:111314328|charged multivesicular body protein 2B	GO:0007034//vacuolar transport		GO:0005622//intracellular
5699	PSR96004.1	Cyclic nucleotide-gated ion channel 8 [Actinidia chinensis var. chinensis]	85938.1	0.027	2	2	PSS21036.1	0.77	0.449|0.993|1.153|0.380|0.837|0.947|0.389|0.826|0.958	0.29	9	0.0491	PSR96004.1	MFECGYKSQFIGGKREKFVRLDDLDSNLSFSSDTGGMKRCGFRIEGLSSAGHSKPTASKSLRRGVERGSEGLRTFGRSLRTGVSRAVFPEDLKVSEKKIFDPQDKSLLFWNKLLVISCILAVSVDPLFFYLPIFNMDESCLGIDTNLAYTITTLRTIIDAFYLIRIALQFRTAYIAPSSRVFGRGELVIDPAQIATRYLHRYFIVDLLSVLPLPQIVVWTFLQKQKGSDILATKQALLFIVFLQYIPRFFRFVPLTSELKKSAGVFAETAWAGAAYYLLWFMLASHIVGAFWYLFAVERSDTCWLKACIDSGKCNIKFLYCHNDEMEGFKDWKAIRHNVLDSKCSVIDDDPPFNYGIYAQALSSKIVSSEDFFSKYCYCLWWGLQNLSTLGQGLQTSTY…	78.138	0	GAV71440.1	cNMP_binding domain-containing protein/Ion_trans domain-containing protein [Cephalotus follicularis]	72.79	0	sp|Q9FXH6|CNGC8_ARATH	Putative cyclic nucleotide-gated ion channel 8 OS=Arabidopsis thaliana GN=CNGC8 PE=3 SV=2	At4g30560	1041	0	KOG0498	K+-channel ERG and related proteins, contain PAS/PAC sensor domain	PT	Inorganic ion transport and metabolism;Signal transduction mechanisms	K05391|1|0.0|1216|oeu:111401910|cyclic nucleotide gated channel, plant		GO:0005249//voltage-gated potassium channel activity	GO:0016021//integral component of membrane
5761	PSR96819.1	Cyclic AMP-responsive element-binding protein like [Actinidia chinensis var. chinensis]	29037.8	0.462	11	22	-	0.74	0.881|0.796|0.626|0.821|0.750|0.583|0.854|0.762|0.569	0.117	9	0.0004492	PSR96819.1	MAAATKVVPAVIVGGGRVGKAMQEMGNGDDLLVKRGDSVPLDFAGPILVCTRNDDLEAVLESTPKSRWDDLVFVQNGMLEPWFHSKGLGDADQVLAYFAIAKLGEPPIDGKTDTNPEGLTAAFGKWASAVAARLHAGGLSCKVLDKDAFQKQMLEKLIWISAFMLVGARHPGATVGVVEKDFRSEVCNLITELAAAAAAEKAIVFEDGMDDRLCAYSRTVAHFPTAVKEFKWRNGWFYSLSEKAIAEGKPDPCPLHTTWLKELKVV	87.17	1e-174	XP_002271931.1	PREDICTED: uncharacterized protein LOC100263834 [Vitis vinifera]	-	-	-	-	-	-	-	-	-	-	-	-			GO:0048046//apoplast;GO:0009570//chloroplast stroma;GO:0009941//chloroplast envelope
5763	PSS19597.1	AT-hook motif nuclear-localized protein [Actinidia chinensis var. chinensis]	29617.9	0.058	1	2	-	0.82	1.059|0.780|1.017|0.946|0.740|0.911|0.719|0.529|0.702	0.172	9	0.01851	PSS19597.1	MKGERGEEKNYANIFTNMRQRETFPPPHHHNLHHQSQTSQEADSQLKTSTTTAADGATIEVVRRPRGRPPGSKNKPKPPVIITRHSDPPMSPYVLEISAGADLIEAIHRFSRKRNLGICVLSASGAVSNVTLRQPSATPGTTVTFHGRFDLLSLSATVMPATTSIPLGNEFAISMAGPQGQIIGGIVVEPLYAAATVHVIAASFTKPSYHKLSAEDGRNSGGNEGNSPPQTAILDHGGHPQPSQTAATESCGMSLYSGHLGSDVIWAPTARQPPPHY	56.429	7e-99	XP_021808289.1	AT-hook motif nuclear-localized protein 17 [Prunus avium]	53.12	7e-94	sp|Q9LTA2|AHL17_ARATH	AT-hook motif nuclear-localized protein 17 OS=Arabidopsis thaliana GN=AHL17 PE=2 SV=1	-	-	-	-	-	-	-	K23047|1|6e-07|55.5|bna:106447564|E3 ubiquitin-protein ligase UNKL [EC:2.3.2.27]	GO:0006351//transcription, DNA-templated	GO:0003700//DNA binding transcription factor activity;GO:0003680//AT DNA binding	GO:0005634//nucleus
5774	PSS00071.1	Transcription factor like [Actinidia chinensis var. chinensis]	37456.6	0.243	1	2	-	0.74	0.652|0.769|0.696|0.595|0.752|0.638|0.773|0.952|0.856	0.113	9	0.0002596	PSS00071.1	MDPKFAGKPIAAHFSGRIDIDQMPDTPNRGTHRRAQSETFVRFPDDILLDDVIADFNLAALDLPSLSSDAAAASMAVDSSKSDSSNGGDKPGARPAGPGPHFRSLSVGADFFEGLEFASGGGDGESERERFGGKPPASSQHRYRHRHSNSMDGSTSSFEADSSGMMMIDGVKKAMGADRLAELALIDPKRAKRILANRQSAARSKERKIRYTGELERKVQTLQTEATTLSAQVTMLQRDTTGLTSENKELKLRLQAMEQQAHLRDALNEALREEVQRLKIATGQIPAANGNPFNRALPPQFSSHQQQMFQNFVTNQTQRPQQQQQRQMSPSTTDHQMPSAHG	65.455	3e-128	KVH99619.1	Basic-leucine zipper domain-containing protein [Cynara cardunculus var. scolymus]	52.4	2e-83	sp|Q9MA75|VIP1_ARATH	Transcription factor VIP1 OS=Arabidopsis thaliana GN=VIP1 PE=1 SV=1	-	-	-	-	-	-	-	K20557|1|9e-132|383|lsv:111890607|transcription factor VIP1		GO:0003700//DNA binding transcription factor activity;GO:0003677//DNA binding	GO:0005634//nucleus
5824	PSR98463.1	DEAD-box ATP-dependent RNA helicase, partial [Actinidia chinensis var. chinensis]	47891.3	0.136	4	4	-	0.8	0.754|0.948|0.768|0.898|0.879|0.787|0.746|0.694|0.755	0.085	9	0.0001842	PSR98463.1	MKGASSDVVEGGNSTATNTKKVVFLTKAQREQLALQRREEEIAEQKRHAEKNLLHNHNRPSSDSKPSSDPSHDSTSRHQHRSSRDRDYERDRERERHERRNRDREREEEQKSRERARLEKLAERERDKELEAIKEQYLGSKKPKKRVIKPSEKFRFSFDWENTEDTSRDMNSLYQNPHEARLLFGRGFRAGMDRREQKKLAAKNEKDLREEIRKKDGIDEKPEEAAAQRLKEEAADLYDTFDMRVDRHWSEKNLEEMTERDWRIFREDFNISYKGSKIPRPMRSWAESRLSGELLKAVERAGYKKPSPIQMAAIPLGLQQRDVIGIAETGSGKTAAFVLPMLTYISRLPPMSEENEAEGPYAVVMAPTRELAQQIEDETVKFAHYLGIKVVSIVGGQSI…	82.75	0	XP_003631587.2	PREDICTED: DEAD-box ATP-dependent RNA helicase 21 [Vitis vinifera]	88.04	0	sp|P93008|RH21_ARATH	DEAD-box ATP-dependent RNA helicase 21 OS=Arabidopsis thaliana GN=RH21 PE=2 SV=1	At2g33730	560	0	KOG0333	U5 snRNP-like RNA helicase subunit	A	RNA processing and modification	K12858|1|0.0|629|vvi:100241918|ATP-dependent RNA helicase DDX23/PRP28 [EC:3.6.4.13]	GO:0000375//RNA splicing, via transesterification reactions;GO:0010501//RNA secondary structure unwinding	GO:0004004//ATP-dependent RNA helicase activity;GO:0004386//helicase activity;GO:0003676//nucleic acid binding;GO:0005524//ATP binding	GO:0005737//cytoplasm;GO:0005730//nucleolus;GO:0071013//catalytic step 2 spliceosome;GO:0005682//U5 snRNP
5833	PSS34441.1	Abscisic acid receptor like [Actinidia chinensis var. chinensis]	23006.4	0.077	1	1	-	0.78	0.568|0.750|0.612|0.960|1.233|1.011|0.562|0.712|0.580	0.239	9	0.01633	PSS34441.1	MPTSLQLHRINTTATATTSSASTATVAISHYHKTSQTIWRPSFSMPDDAVHHHTHAVGPGQCCSAVVQNIAAPIAAVWPVVRRFDNPQAYKHFLKSCHVLDGDCAVGSLREVHVVSGLPAESSTERLEILDDERHVISFSVVGGDHRLKNYRSVTTLHQSPTGSGTVVIESYVVDVPPGNTKDETCVFADTIVRCNLQSLAQIAEDFSR	71.564	3e-101	XP_018821695.1	PREDICTED: abscisic acid receptor PYL4-like [Juglans regia]	78.44	1e-82	sp|O80920|PYL4_ARATH	Abscisic acid receptor PYL4 OS=Arabidopsis thaliana GN=PYL4 PE=1 SV=1	-	-	-	-	-	-	-	K14496|1|5e-102|297|jre:108991765|abscisic acid receptor PYR/PYL family	-	-	-
5883	PSS01314.1	GDSL esterase/lipase [Actinidia chinensis var. chinensis]	42242.1	0.113	5	6	-	0.82	0.787|1.040|0.800|0.749|0.968|0.801|0.699|0.874|0.704	0.116	9	0.002168	PSS01314.1	MDSPAGVWVFGWLVVALAVGQIGVGIRGGALRGCGFPAIYNFGDSNSDTGGISAAFSAVPLPNGETFFGKPSGRGCDGRLIIDFIAEDLGLPYLSAYLDSIGTSFRHGANFATGGSSIRPGSYSPFHLDYQVSQFIQFKSRTTALYKQPRTNGTIPQCKSRLPKPEDFSKAIYTFDIGQNDLAIGFQNTNIEQVRASIPDILDKFSQAIQQLYKEGARVFWVHNTGPIGCLPYNVIYDRIRSKAGNLDQIGCVKPQNEVAMEFNKQLKDRISKLRALLLNTTFTYVDVYSAKYSLIRNAKNLGFDDPNKFCCGSYYGYHINCGRTATVNGTVYGNPCKDPSKHISWDGIHYSEAANFLLAKRVVNGSLSDPPVSVADACRTP	73.58	0	XP_006446489.1	hypothetical protein CICLE_v10015583mg [Citrus clementina]	52.37	1e-140	sp|Q9LY84|GDL76_ARATH	GDSL esterase/lipase At5g14450 OS=Arabidopsis thaliana GN=At5g14450 PE=2 SV=1	-	-	-	-	-	-	-	K01206|1|1e-126|373|lang:109336872|alpha-L-fucosidase [EC:3.2.1.51]		GO:0016788//hydrolase activity, acting on ester bonds	GO:0016021//integral component of membrane
5894	PSR96028.1	Ribulose bisphosphate carboxylase/oxygenase [Actinidia chinensis var. chinensis]	31228.5	0.043	1	1	-	0.79	1.071|0.749|0.757|0.784|0.558|0.539|1.105|0.753|0.760	0.194	9	0.01092	PSR96028.1	MAATSASIITSSAKTLLAARPSNNGGPSVSNSYVSSFVGTCLPRYLPKKRKSCKTRGKITAAAATVVTNPAEEVREFLLPTWAEFDIGRAPVYWKTMNGLPPTSGERLRIFYNPAVNNLVPNEEYGIAFNGGFNQPIMCGGEPRAMLKKTRGKADLPLYSIQICIPKHALNLIFSFTNGVEWDGPYRLQFQVPRPWQNKPISFFNEGLVEELSKEGACEKAIFPDTNIVVTRCAMIGNLTVEGGDRCNLDLVLGCTDPSSPYYDPLANVDDGSCPIDSDSED	75.704	3e-160	XP_015870740.1	PREDICTED: uncharacterized protein LOC107407915 [Ziziphus jujuba]	-	-	-	-	-	-	-	-	-	-	-	-	GO:0010478//chlororespiration		GO:0009579//thylakoid;GO:0009570//chloroplast stroma
5914	PSR88057.1	Glucose-6-phosphate 1-epimerase [Actinidia chinensis var. chinensis]	10653.3	0.081	1	2	PSS30832.1	0.56	0.654|0.813|0.608|0.545|0.678|0.491|0.397|0.471|0.352	0.147	9	0.0001238	PSR88057.1	MAFASLKKETSSLGVRVTEGEGKLPKVVLTSPHGSEAELYLFGGCLMSWKVSNKDLLFVRPDAVFNGQKPISGGVPHCFPQFGATLGLAQCSSMDSQGM	85.882	5e-44	XP_002310246.2	hypothetical protein POPTR_0007s13060g [Populus trichocarpa]	47.06	3e-12	sp|Q40784|AAPC_CENCI	Putative glucose-6-phosphate 1-epimerase OS=Cenchrus ciliaris PE=2 SV=1	At5g66530	127	3e-37	KOG1594	Uncharacterized enzymes related to aldose 1-epimerase	G	Carbohydrate transport and metabolism	K01792|1|6e-45|150|lsv:111916159|glucose-6-phosphate 1-epimerase [EC:5.1.3.15]	GO:0005975//carbohydrate metabolic process	GO:0030246//carbohydrate binding;GO:0047938//glucose-6-phosphate 1-epimerase activity	GO:0048046//apoplast;GO:0009570//chloroplast stroma
5940	PSS07808.1	Serine-rich adhesin for platelets like [Actinidia chinensis var. chinensis]	177804	0.007	1	1	-	0.76	0.780|0.998|0.872|0.842|1.065|0.916|0.407|0.495|0.432	0.249	9	0.02684	PSS07808.1	MHGREGENWKRSRHMWSVPTSTVTRTAADSFCKGGRKISVGDCALFKPPQDSPPFIGLIRWLTLNKDNNLQLGVNWLYRPGELKLCKGILLDAAPNEVFYSFHKDAIPAASLLHPCKVTFLPKGVELPSGISSFVCRRVYDIANKCLWWLTDQDYIDERQEEVDKLLSKTRIQMHPTVQPGGRSPKPLHGPTSSSQLKPGSDNVQSAGSFPSEAKGKKRERADHTTVPVKRERSSMADDGDSPQFKTENNLKSEISKITDKGGLVDPEGVEKLVQLMQPDRAERRMELISRSMLASVIAATEKFDCLSRFVQLKGLVVLDEWLQDAHKGKLGDGSPKDGDKSLEEFLLVLLRALDKLPVNLHALQMCNIGKSVNHLRSHKNTEIQKKARSLVDTWKKRV…	64.176	0	XP_010663203.1	PREDICTED: uncharacterized protein LOC100248456 [Vitis vinifera]	-	-	-	-	At3g48050	1342	0	KOG1886	BAH domain proteins	K	Transcription	K04733|1|5e-40|163|ats:109754742|interleukin-1 receptor-associated kinase 4 [EC:2.7.11.1]!K17552|2|5e-06|56.6|mis:MICPUN_54855|protein phosphatase 1 regulatory subunit 10	GO:0006368//transcription elongation from RNA polymerase II promoter	GO:0003682//chromatin binding	GO:0070449//elongin complex
5960	PSR98591.1	hypothetical protein CEY00_Acc25108 [Actinidia chinensis var. chinensis]	16350	0.071	1	1	-	0.73	0.730|0.923|0.508|0.873|1.084|0.594|0.637|0.778|0.427	0.21	9	0.007233	PSR98591.1	MKEGKEGTKETAQEMKDKTESMGERAAEKANDMKEKTKDTAEAATEKAKHDTNKAADATGTAVGKAKETAETVAEKAKDGTYKTGETAAETVKEGTSKASEMANQTVQGALGAVKETTQKIKETVVGKSEDDNIDDFIEDHVRKPKAEHGGGEN	46.405	4e-25	XP_011096321.1	uncharacterized protein ECU03_1610 isoform X1 [Sesamum indicum]	-	-	-	-	At5g44310	57	8e-10	KOG4744	Uncharacterized conserved protein	S	Function unknown	-	-	-	-
5981	PSS32955.1	Granule-bound starch synthase [Actinidia chinensis var. chinensis]	68262.1	0.205	9	12	-	0.83	0.910|0.770|0.858|0.904|0.777|0.836|0.882|0.735|0.817	0.062	9	7.606e-05	PSS32955.1	MATVTSSRFVSRNSWVATGSDPKLTFTENGMRNEFMTRSGLRPLNKLDLLQLRTHGKPRQLRRKASKDSKPQTAARARQGVIKCESGMTVAFVAAEVSPWSKTGGLGDVLGGLPPAMAANGHRVMTISPRYDQYKDAWDTNVAVELKVGDSIETVRFFHCHKRGVDRVFVDHPIFLEKVWGKTGTKIYGPNAGTDFKDNQLRFSLLCLAALEAPRVLNLTSNEYFSGPYGEDVVFVANDWHTALLPCYLKSMYKSRGIYKNAKVAFCIHNIAYQGRFAFSDFELLNLPEEFKGSFDFIDGYDKPVKGRKINWMKAGILESDRVLTVSPYYAQELASGEEKGVELDNIIRKTGITGIVNGMDAQEWNPSTDKYITVNYDASTVMEAKSLLKEDLQAEVGL…	77.958	0	OVA04705.1	Glycosyl transferase [Macleaya cordata]	74.96	0	sp|O82627|SSG1_ANTMA	Granule-bound starch synthase 1, chloroplastic/amyloplastic OS=Antirrhinum majus GN=WAXY PE=2 SV=1	-	-	-	-	-	-	-	K13679|1|0.0|976|nnu:104593836|granule-bound starch synthase [EC:2.4.1.242]	GO:0019252//starch biosynthetic process	GO:0004373//glycogen (starch) synthase activity	GO:0009501//amyloplast;GO:0009507//chloroplast
5984	PSS21671.1	2-C-methyl-D-erythritol 4-phosphate cytidylyltransferase [Actinidia chinensis var. chinensis]	34004.9	0.346	2	3	-	0.77	0.846|0.747|0.899|0.857|0.767|0.892|0.680|0.573|0.693	0.111	9	0.0006889	PSS21671.1	MTALQLSLGLPPSSSSSKSSISLPHFSNSCHSHLQLTSSRVSRNPCNSIASLSKARIAKSRITCSAKAVELKGSEIVKEKSVSVILLAGGKGKRMGASMPKQYLPLLGQPIALYSFYTFSQMIEVKEIIVVCDPSYEDIFQDTKEKIQVDLKFTLPGKERQDSVYSGLQAVDLKSELVCIHDSARPLVTSGDVKKVLKDGWLNGAAVLGVPVKATIKEANSESYVARTLDRKTLWEMQTPQVIKPDLLKKGFELVNREGLEVTDDVSIVEHLKHPVYITEGSYTNIKVTTPDDLLLAERILNPSSGEAS	78.218	3e-161	XP_020409771.1	2-C-methyl-D-erythritol 4-phosphate cytidylyltransferase, chloroplastic isoform X2 [Prunus persica]	78.73	7e-128	sp|P69834|ISPD_ARATH	2-C-methyl-D-erythritol 4-phosphate cytidylyltransferase, chloroplastic OS=Arabidopsis thaliana GN=ISPD PE=1 SV=1	-	-	-	-	-	-	-	K00991|1|8e-161|454|mesc:110600407|2-C-methyl-D-erythritol 4-phosphate cytidylyltransferase [EC:2.7.7.60]	GO:0008299//isoprenoid biosynthetic process	GO:0050518//2-C-methyl-D-erythritol 4-phosphate cytidylyltransferase activity	-
5986	PSR98350.1	Rhomboid-like protein [Actinidia chinensis var. chinensis]	36970.2	0.031	1	1	-	0.69	0.504|0.497|0.847|0.572|0.579|0.935|0.635|0.603|1.027	0.196	9	0.001922	PSR98350.1	MERGRGSRGLLPLLAVHAASEYWRLDRKPPVTAALVAANALVYLRPGVLDRVLPTIDEVWFNPHLIVKHRDLKRFFLSAFYHIGEPHLVYNMVSLLWKGIQLETSMGSCEFASMVITLLGLSQGVTLLLSKSLVLFFDYGKPYYREYAAGFSGILFAMKVVLNSETDNYSYVHGLMVPSRYAAWAELILIQMFVPNSSFIGHLGGILAGILYMKLRASCSGTDPLTAFIRGFRTVLGWPLRFLMGLSPFRRRRILGRGRVGRNQRSRSGTWSCPVCTFNNSGWLNVCEMCGTGRNGDGLSSFGSSNQSRDLSLEELRQRRIQRFGR	71.515	2e-168	AIY60667.1	rhomboid protein Ilepu_RBL14 [Ilex purpurea]	65.55	4e-141	sp|Q8RXW0|RBL14_ARATH	Rhomboid-like protein 14, mitochondrial OS=Arabidopsis thaliana GN=RBL14 PE=2 SV=1	At3g17610_2	378	7e-132	KOG2632	Rhomboid family proteins	S	Function unknown	K09651|1|1e-159|452|nsy:104211836|rhomboid domain-containing protein 1 [EC:3.4.21.-]		GO:0004252//serine-type endopeptidase activity;GO:0046872//metal ion binding	GO:0016021//integral component of membrane
6013	PSS29489.1	Secretagogin like [Actinidia chinensis var. chinensis]	39814.4	0.052	2	4	-	0.71	0.641|0.990|0.570|0.631|0.961|0.515|0.727|0.812|0.579	0.172	9	0.001638	PSS29489.1	MEEKKKSGEVMDGSDIMELVGNEKVFSSFVDHKFQELDQDCDGTLSLKELQPAVADIGAALGLPAQGTSPDSDHIYSEVLSEFTNGKKGKVSKTEFKEVLSDILLGMAAGLKRDPIVILRIDGEDLHEFIKSPGFEPEMVSIFSELELELAEGSLKDYIMKALEKLTVEQGMPPASDSWVMSNIIEPALQTCGGVDQQLISQETFLVEFRKGAESVVQKLKDHPVIVAHSENTFEGSGIKKLLSNKFELDKLLETTLKNVPRDRQGKIPKEYLRVALDVVAPSAGLPPLGAVDQMDKVIGDVFKMLDADDGKVVKEDEFKKMLAEILGSIMLQLESNPVSVSTNSVVHEPLASASTLLQPSNSL	76.731	0	XP_016539894.1	PREDICTED: uncharacterized protein LOC107840522 [Capsicum annuum]	-	-	-	-	-	-	-	-	-	-	-	-		GO:0005509//calcium ion binding	-
6019	PSS35746.1	Calcium sensing receptor like [Actinidia chinensis var. chinensis]	78322.7	0.238	14	21	-	0.8	1.026|0.799|0.759|0.848|0.702|0.600|0.954|0.764|0.751	0.128	9	0.002293	PSS35746.1	MTMVPVCSATTGCSSRSQISSLGGLQQLSLYRKTFEVRCVAEERVVFSLSSGNHLHGISFKTEVATSFYSNFIVGREQSGSMGFMKLHPYQNELCDNKWECLDNWSYPTGGINVPQYEGMGDLKFVASSSVSSREQELMDLTDRVIERTNIMPESVDAQNITTTDVIPDDPASVSDTLTIDSDSLSSVKTNIGDIFAGFSESINASVNKGETALKNSIDKITSSVTSALKGVNGAVDNTFSKVTSSVDQMGESADNKFTGFSNALKEASNKVGAITVDVLRHAIVQIEDSLNQGATFVVYAYGSTKNLLPPEVQNVLSSSEERVVTISRPVGTAFQQIYTALEGLEKSLGLDPNDPIIPFVLFIGASAALWGSYWLFTYGGYEGDLTPKSTLELLRGKD…	59.441	0	XP_002274820.2	PREDICTED: uncharacterized protein LOC100249037 [Vitis vinifera]	30.56	6e-19	sp|Q9FN48|CAS_ARATH	Calcium sensing receptor, chloroplastic OS=Arabidopsis thaliana GN=CAS PE=1 SV=1	-	-	-	-	-	-	-	-			GO:0009534//chloroplast thylakoid;GO:0005634//nucleus
6021	PSS36530.1	Microspherule protein [Actinidia chinensis var. chinensis]	97102	0.016	1	1	-	0.58	0.641|0.672|0.642|0.668|0.724|0.659|0.414|0.399|0.380	0.137	9	0.0001684	PSS36530.1	MAAVALSSIWIPEDDLLLKNSIEAGASLEALAKGAVQFSRRFTFQELQDRWYTLLYDPDISAQASARMGDLQRSASNLSSELNRSDKAKQIPEKRKFASIRKQYYAMRKRIRNEFFSSTDLGFLPESNLHNYSGNGGDFHEHATLDNGPSVGNCEPNHFRLQETDFDILRHAFPETMAGIAATNDVANIGEAFHYGGPDSLANNHMSRVARNNCLHELPEDVSSLSIQGSLRNDGTKSFPRYSAHKDIPQNLDNNLADLGKISGVEEMGSSKPLPETNLFETDGSDVKPLSTFESTNNKLHNDGSEFGGTQHLSSPNSDGSASLHTMGFSPLMPTMPLWKTMEDVSAPAIPVNVSPGDEKQCGEEISEQPDNDDGKRKGSPEHGVINSTALSDGEFADL…	45.143	0	CDP01942.1	unnamed protein product [Coffea canephora]	-	-	-	-	At3g54350	223	2e-61	KOG2293	Daxx-interacting protein MSP58/p78, contains FHA domain	KT	Transcription;Signal transduction mechanisms	K11674|1|0.0|645|dcr:108223383|microspherule protein 1	-	-	-
6030	PSS29248.1	Pathogenesis-related protein PR-1 type like [Actinidia chinensis var. chinensis]	17752.4	0.305	4	19	-	0.75	0.634|0.863|0.533|0.689|0.973|0.541|0.831|1.023|0.650	0.181	9	0.004423	PSS29248.1	MGLSKNSSLALVCFAILATVHSSLAQNSPQDYVNAHNAVRAQVGVGPITWDPNVAAFAQNYANKRVGDCAMIHSGGGGKYGENIAAGSGDFTGAMAVGLWAGEKPDYNYNSNSCAPGKVCGHYTQIVWRNSVRLGCARVRCNSGSWFVTCNYDPPGNFVGQRPY	69.277	1e-79	XP_018822482.1	PREDICTED: pathogenesis-related protein 1-like [Juglans regia]	65.24	1e-76	sp|Q04108|PR04_SOLLC	Pathogenesis-related leaf protein 4 OS=Solanum lycopersicum PE=2 SV=1	At4g33720	204	8e-68	KOG3017	Defense-related protein containing SCP domain	S	Function unknown	K13449|1|2e-80|239|jre:108992380|pathogenesis-related protein 1			GO:0005576//extracellular region
6042	PSS24897.1	Histone H2AXb like [Actinidia chinensis var. chinensis]	14610	0.2	1	1	-	0.72	1.051|0.821|0.641|0.913|0.759|0.567|0.730|0.581|0.454	0.186	9	0.003643	PSS24897.1	MSSGGGSTKGGRGKPKASKSVSRSQKAGLQFPVGRIARFLKAGKYAERVGAGAPVYLSAVLEYLAAEVLELAGNAARDNKKNRIVPRHIQLAVRNDEELSKLLGSVTIANGGVLPNIHQTLLPKKTGKGKGDIGSASQEF	98.571	4e-94	XP_021619316.1	histone H2AX [Manihot esculenta]	93.66	7e-91	sp|Q9S9K7|H2AXB_ARATH	Probable histone H2AXb OS=Arabidopsis thaliana GN=At1g54690 PE=1 SV=1	At1g54690	259	1e-90	KOG1756	Histone 2A	B	Chromatin structure and dynamics	K11251|1|8e-95|273|mesc:110620054|histone H2A	GO:0006342//chromatin silencing	GO:0003677//DNA binding;GO:0046982//protein heterodimerization activity	GO:0005634//nucleus;GO:0000786//nucleosome;GO:0000790//nuclear chromatin
6063	PSS05090.1	Aquaporin PIP2-1 like [Actinidia chinensis var. chinensis]	30400.7	0.085	1	1	-	0.79	0.911|0.872|0.774|0.842|0.814|0.704|0.796|0.753|0.667	0.078	9	0.0001001	PSS05090.1	MGKDTEMTEQGSFSAKDYQDPPPAPLIDPKELGKWSFYRALIAEFIATLLFLYITVLTVIGYKSNKSADPCDGVGILGIAWAFGGMIFVLVYCTAGISGGHINPAVTFGLFLARKVSLIRAVMYMVAQCLGAICGVGLVKAFQNSYYDNNGGGANMLASGYNKGTGLGAEIIGTFVLVYTVFSATDPKRSARDSHVPVLAPLPIGFAVFMVHLATIPVTGTGINPARSFGAAVIYNKSKAWDDHWIFWVGPFLGAAIAAFYHQFILRAGAIKALGSFRSSSHV	95.406	0	ARS45533.1	aquaporin PIP2-1 [Actinidia deliciosa]	82.08	2e-170	sp|Q9SV31|PIP25_ARATH	Probable aquaporin PIP2-5 OS=Arabidopsis thaliana GN=PIP2-5 PE=1 SV=1	At3g54820	472	5e-170	KOG0223	Aquaporin (major intrinsic protein family)	G	Carbohydrate transport and metabolism	K09872|1|0.0|510|jre:108990111|aquaporin PIP	-	-	-
6080	PSS34290.1	DnaJ protein like [Actinidia chinensis var. chinensis]	77683.6	0.074	1	1	-	0.83	0.847|1.024|0.877|0.857|1.025|0.863|0.621|0.723|0.619	0.15	9	0.01161	PSS34290.1	MAASEENSALFPIFILTIMALPLVPYTILKLCRAASKKTKSIHCECSVCSRSGKYRKSIFKRISNFSTWSNLTVVLLWVIMVVLVYYIKHLSREIQVFEPFSILGLEPGASDSEIKKAYRKLSIQYHPDKNPDPEANKYFVESISKAYQALTDPISRENFEKYGHPDGRQGFQMGIALPQFLLNIDGASGGILLLWIVGVCILLPLVIAVVYLSRSSKYTGNYVMHQTLSAYYYFMKPSLAPSKVMDVFIKAAEYMEIPVRRTDGEPLQKLFMSVRSELNLDLKNIKQEQAKFWKQHPALVKTQLLIQAQLTRETEALLPELQRDFKRVLELAPRLLEELMKMAVVPRTTQGHGWLRPAIGVLELSQCIVQAVPLSARKATGGYTEGAAPFLQLPHFNE…	80.786	0	GAV76318.1	DnaJ domain-containing protein/Sec63 domain-containing protein [Cephalotus follicularis]	79.01	0	sp|Q0WT48|DNJ21_ARATH	DnaJ protein ERDJ2A OS=Arabidopsis thaliana GN=ERDJ2A PE=1 SV=1	At1g79940_2	652	0	KOG0951	RNA helicase BRR2, DEAD-box superfamily	A	RNA processing and modification	K09540|1|0.0|1145|vvi:100254350|translocation protein SEC63	GO:0031204//posttranslational protein targeting to membrane, translocation	GO:0008565//protein transporter activity	GO:0016021//integral component of membrane;GO:0005622//intracellular
6091	PSS33895.1	Photosystem I reaction center subunit II like [Actinidia chinensis var. chinensis]	22382.6	0.377	1	8	-	0.82	1.133|0.824|0.862|0.985|0.699|0.698|0.902|0.638|0.672	0.165	9	0.01156	PSS33895.1	MAMATQASLFTPTLSTPKPGLAAPWNQPSILSFTSPKSTKLSMAPRPIRTAATEGAVEAPVGFCPPELDPSTPSPIFGGSTGGLLRKAQVEEFYVITWESPKEQIFEMPTGGAAIMRQGPNLLKLARKEQCLALGTRLRSKYKIKYQFYRVFPNGEVQYLHPKDGVYPEKVNPGRQGVGLNMRSIGKNASPIEVKFTGKQVYDL	83.178	6e-124	ASL69230.1	photosystem I subunit D-1 [Diospyros kaki]	82.13	1e-120	sp|P32869|PSAD_CUCSA	Photosystem I reaction center subunit II, chloroplastic OS=Cucumis sativus GN=psaD PE=1 SV=1	-	-	-	-	-	-	-	K02692|1|4e-120|342|rcu:8261461|photosystem I subunit II	GO:0015979//photosynthesis		GO:0009535//chloroplast thylakoid membrane;GO:0009538//photosystem I reaction center
6133	PSS28962.1	Non-specific lipid-transfer protein [Actinidia chinensis var. chinensis]	14515.3	0.519	6	37	-	0.57	0.348|1.054|0.311|0.398|1.120|0.347|0.343|0.949|0.285	0.355	9	0.005699	PSS28962.1	MAAVSYKVACIAVLCMVAVAVAPYAEAAITCGMVQSKLAPCVTYLKSGGAVPPKCCSGVKGLNSLASTKPDRQQACQCIKNAAQQIPGINPGLASGLPGKCGVKIPYPISPSTDCSKYLSPPLSLTHIYTYTYTR	65.812	4e-45	AFR43276.1	lipid transfer protein precursor [Gossypium herbaceum subsp. africanum]	61.54	1e-42	sp|Q43129|NLTP2_GOSHI	Non-specific lipid-transfer protein OS=Gossypium hirsutum PE=2 SV=1	-	-	-	-	-	-	-	-	GO:0006869//lipid transport	GO:0008289//lipid binding	-
6172	PSS05943.1	CTP synthase [Actinidia chinensis var. chinensis]	16955.5	0.077	1	1	-	0.77	0.884|0.778|0.888|0.812|0.741|0.809|0.709|0.617|0.703	0.089	9	0.0001388	PSS05943.1	MASLFITPIFSSLSAKTSIKECKKSHSIPGKHHTINAMRIEKPLEELYNVRVERKVSQERLAELGVSRWSIWKTGKCKLPWDCHVDQLVYIEEGEVRVVPEGSQRFMQFVAGDLVRYPKWFEADLFFNDFYQERYSFRAYGDD	75.524	8e-76	XP_011086370.1	uncharacterized protein LOC105168121 [Sesamum indicum]	-	-	-	-	-	-	-	-	-	-	-	K06995|1|7e-18|77.4|smo:SELMODRAFT_80801|uncharacterized protein	-	-	-
6186	PSR87586.1	Protein farnesyltransferase subunit beta like [Actinidia chinensis var. chinensis]	50922.6	0.038	2	2	-	0.81	0.812|0.779|0.780|0.806|0.775|0.753|0.898|0.838|0.836	0.044	9	2.181e-06	PSR87586.1	MEPSPASRATATQHEQWMVEGQVFEMYKVFMDLPPNSQTAKLEVQREKHIEYLSKGLRQLGPSFVVLDANRPWICYWILHSIALLGESVEAEMEENVIDFLCRCQHPDGGYGGGPGQLPHLATTYAAVNALITLGGPRSFSSIHRGKLYSFLLRMKHASGGFRMHDGGEVDVRACYTAISVASIMNILDYELVQNVGNYIISCQTYEGGIAGEPGSEAHGGYTFCGLATMILINEVNHLDLPSLIDWVVFRQGAEGGFQGRTNKLVDGCYSFWQGGVSALIQRLHSVVDEQLMPSDAEEEDCSTDTRSSSTPVSCEGEQGHVDETCHLSQEGQQIACAPVNFFSIGLDFIREHAKLEPLFHSMALQQYILLCSQVEGGFRDKPGKHKDYYHTCYCLSGL…	68.584	0	XP_018822999.1	PREDICTED: protein farnesyltransferase subunit beta [Juglans regia]	61.01	0	sp|Q04903|FNTB_PEA	Protein farnesyltransferase subunit beta OS=Pisum sativum GN=FTB PE=1 SV=1	At5g40280	478	1e-166	KOG0365	Beta subunit of farnesyltransferase	O	Posttranslational modification, protein turnover, chaperones	K05954|1|0.0|636|jre:108992807|protein farnesyltransferase subunit beta [EC:2.5.1.58]	GO:0042127//regulation of cell proliferation;GO:0018343//protein farnesylation	GO:0003824//catalytic activity;GO:0016740//transferase activity	GO:0005965//protein farnesyltransferase complex
6189	PSS06473.1	Heterogeneous nuclear ribonucleoprotein like [Actinidia chinensis var. chinensis]	35971.3	0.392	2	5	-	0.78	0.889|0.685|0.806|0.749|0.587|0.661|1.007|0.771|0.872	0.129	9	0.001578	PSS06473.1	MGSKKSDFGDGASPGKIFIGGLAKDATLDQFTKYFGKYGEITDSVIMKDRQTGRPRGFGFITYADPSVVDTVIAETHVINGKQVEIKRTIPKGAAESKDFKTKKIFVGGIPTSVTEDEFKSFFSKYGKVVEHEIIRDHVTKRSRGFGFIIFDNEQVVDTILTNGNMIDMEGTQVEIKKAEPKKSSNPAPASAYGSDSRGRGYGEGFGGFGNSYSGFGPPPYRTFGGLGSRFGDYGGYGGGGGSEFGGRYGDFGGSDYMDYRGEPSLGSYSSSRYGSYGGGFNSGYGGSGLGAYGRGGGSYGSYGGSGSGASYDSGPGPGYGGAGGIYGGRAGYSGGSRYHPYGR	70.67	3e-143	XP_021812589.1	heterogeneous nuclear ribonucleoprotein 1-like [Prunus avium]	40.21	2e-47	sp|Q8W034|RNP1_ARATH	Heterogeneous nuclear ribonucleoprotein 1 OS=Arabidopsis thaliana GN=RNP1 PE=1 SV=1	At5g40490	248	4e-79	KOG0118	FOG: RRM domain	R	General function prediction only	K12741|1|1e-151|434|oeu:111393234|heterogeneous nuclear ribonucleoprotein A1/A3		GO:0003723//RNA binding	GO:0019013//viral nucleocapsid;GO:0030529//intracellular ribonucleoprotein complex
6193	PSS00289.1	Sodium/metabolite cotransporter BASS2 precursor [Actinidia chinensis var. chinensis]	43584.3	0.027	1	1	-	0.62	0.605|0.575|0.531|0.773|0.794|0.709|0.570|0.521|0.480	0.114	9	3.355e-05	PSS00289.1	MSISLCFTPFSSHPHPLRPIPLSRPTKPTSISSPTKPSNPPTTIVRSANKSSNSDHPTVAPAKPRWEDALSTAASLYPFYVTAGGVVACLRPSTFAWLVERGPASYSLSLGFIMLTMGLTLELRDLLNLFLQRPLAILFGCVAQYTIMPAFGLFISKFLGLAPSVSVGLILLGCCPGGTASNVVTLIAQGDVPLSIVMTVCTTLGAVLLTPLLTKILAGTYVPVDALQLSISTLQVVVAPILIGSYMQSTFPKVVKVVIPFAPLLAVLTSSLLACSVFSENVIRLKSSMLVASLSSDMSPLLRARAILAGELGVIILSVLLLHFAGFFVGYISAAISGFREPQRRAISIEVGMQNSSLGVVLATSHFSSPMVALPPALSAVIMNIMGSTLGVVWRYIDP…	74.453	0	GAV90213.1	SBF domain-containing protein [Cephalotus follicularis]	42.33	3e-75	sp|Q93YR2|BASS1_ARATH	Probable sodium/metabolite cotransporter BASS1, chloroplastic OS=Arabidopsis thaliana GN=BASS1 PE=2 SV=1	At1g78560	239	5e-75	KOG2718	Na+-bile acid cotransporter	P	Inorganic ion transport and metabolism	K03453|1|0.0|588|mesc:110623855|bile acid:Na+ symporter, BASS family			GO:0016021//integral component of membrane
6214	PSR96735.1	Autophagy-related protein, partial [Actinidia chinensis var. chinensis]	56930.5	0.016	1	1	-	0.76	0.626|0.968|1.082|0.608|0.887|1.086|0.439|0.551|0.614	0.245	9	0.01927	PSR96735.1	SQDEIAMEAIKHALKALRKRHLIEEGAHGPAFIALSRPLVIQGSEWKEKAETLEVELQQCYKAQARLSEQLVVEVSESRTSKTLVVEKEAIIMDLQNELTKARDECTHLTVHLEEKTKALELIMNEHQELKEQLEGMTLRAKNAEAENKTLTDRWMLQKMQDAERLNEANALYEDMLDRLKASGMEQLARQQVDGVVRRIEGAEYYVEPTIPTAYKHKIPAHEGGCAAIFFEYSSGKLVSGGQDRTIKMWDTNTGSLSHSLYGCLGSVLDLTTTHDNKSVIAASSSNNLYVWDVNSGRMQHTLTGHTDKVCSVDVSKISTRHVISAAYDRTIKVWDLQKGFCTNTIIFHSNCNALCFSMDGRTVWSGHVDGHLRLWDIQTGKLLSEIAAHSLAITSISL…	81.693	0	XP_002321652.1	transducin family protein [Populus trichocarpa]	71.01	0	sp|Q6NNP0|ATG16_ARATH	Autophagy-related protein 16 OS=Arabidopsis thaliana GN=ATG16 PE=2 SV=1	At5g50230	780	0	KOG0288	WD40 repeat protein TipD	R	General function prediction only	K17890|1|0.0|875|pop:7463073|autophagy-related protein 16-1	GO:0000045//autophagosome assembly		GO:0000421//autophagosome membrane
6250	PSS19356.1	Dynamin-like protein [Actinidia chinensis var. chinensis]	87756.9	0.026	2	2	-	0.83	0.774|0.698|0.769|0.946|0.853|0.917|0.873|0.771|0.845	0.08	9	0.0003414	PSS19356.1	MMSEKGEEDSAVNLISQETEEAQARVYEAYNELHGLAQEFSTPFDAPAVLVVGHQTDGKSALVEALMGFQFNHVGGGTKTRRPITLHMKYDPDSHSPLCHLLSDSDPSLAHQKSLQQIQAYIEAENMRLEHEPCQFSAKEIIIRVEYKYCPNLTIIDTPGLIAPAPGRKNRALQGQARAVESLVRAKMQHKEFIILCLEDCNDWSNATTRRVVMQIDPELSRTVIVSTKLDTKIPQFARASDVEVFLSPPACTLDGFMLGDSPFFTSVPSGRVGSGHESVYRSNDEFKQAISLREMEDIASLEEKLGRPLSKKERSRIGVSSLRLFLEELLQRRYMDSVPLIIPLLEKEYRSTSRKLNGIDQELSTLDQVKLKEKGRTFHDLFLTKLSLLLKGAVVAPP…	89.987	0	XP_002266729.1	PREDICTED: dynamin-like protein ARC5 [Vitis vinifera]	79.24	0	sp|Q84N64|ARC5_ARATH	Dynamin-like protein ARC5 OS=Arabidopsis thaliana GN=ARC5 PE=1 SV=2	At3g19720	1064	0	KOG0446	Vacuolar sorting protein VPS1, dynamin, and related proteins	UR	Intracellular trafficking, secretion, and vesicular transport;General function prediction only	K17065|1|1e-14|83.2|ccp:CHC_T00003610001|dynamin 1-like protein [EC:3.6.5.5]	GO:0007623//circadian rhythm;GO:0016559//peroxisome fission;GO:0010020//chloroplast fission	GO:0003924//GTPase activity;GO:0008017//microtubule binding;GO:0005525//GTP binding;GO:0042802//identical protein binding	GO:0005777//peroxisome;GO:0009707//chloroplast outer membrane;GO:0009507//chloroplast
6254	PSS14530.1	histone H3.2 [Actinidia chinensis var. chinensis]	15347.5	0.169	1	12	PSR95393.1;PSR95394.1;PSR86852.1	0.51	0.519|0.519|0.541|0.535|0.546|0.536|0.465|0.445|0.452	0.041	9	7.285e-09	PSS14530.1	MARTKQTARKSTGGKAPRKQLATKAARKSAPATGGVKKPHRFRPGTVALREIRKYQKSTELLIRKLPFQRLVREIAQDFKTDLRFQSSAVSALQEASEAYLVGLFEDTNLCAIHAKRVTIMPKDMQLARRIRGERA	100	2e-94	KMZ60580.1	histone H3 [Zostera marina]	98.53	2e-95	sp|P68428|H32_WHEAT	Histone H3.2 OS=Triticum aestivum PE=1 SV=2	At5g65360	269	1e-94	KOG1745	Histones H3 and H4	B	Chromatin structure and dynamics	K11253|1|1e-94|272|ccav:112518929|histone H3	GO:0006334//nucleosome assembly	GO:0031492//nucleosomal DNA binding;GO:0003677//DNA binding;GO:0046982//protein heterodimerization activity	GO:0005634//nucleus;GO:0000786//nucleosome
6314	PSS19548.1	Sulfate transporter 1.3 like [Actinidia chinensis var. chinensis]	59598.2	0.019	1	1	-	0.8	0.965|0.705|0.553|0.909|0.689|0.514|1.233|0.917|0.718	0.227	9	0.02474	PSS19548.1	MARNTDEEMEMKEMDIKSMSSSQRHIQYFPYIHKVGVPPKQDLFKEFTTTVKETFFADDPLRHFKDQPKSRKVVLGLQAVFPILEWAQSYNLSKFRGDLIAGLTIASLCIPQDIGYAKLANLDPQYGLYSSFVPPLIYAFMGSSRDIAIGPVAVVSLLLGTLLQNQIDPTENPAEYLRLAFTATFFAGITQVTLGFLRLGFLIDFLSHAAVVGFMAGAAITISLQQLKGFLGIKHFTKETDIISVMQSVFGSAHHGWNWPTIVIGATFLAFLLVAKYIGKKNNKLFWVPAIAPLISVVLSTFFVYITHAEKQGVQIVKHLEKGINPSSVNQIYFTGDYLLKGFRIGVVAGMIALTEAVAIGRTFAAMKDYQLDGNKEMVALGTMNVVGSMTSCYIATGS…	85.772	0	XP_019082264.1	PREDICTED: sulfate transporter isoform X2 [Vitis vinifera]	76.21	0	sp|Q9FEP7|SUT13_ARATH	Sulfate transporter 1.3 OS=Arabidopsis thaliana GN=SULTR1;3 PE=2 SV=1	At4g08620	724	0	KOG0236	Sulfate/bicarbonate/oxalate exchanger SAT-1 and related transporters (SLC26 family)	P	Inorganic ion transport and metabolism	K17470|1|0.0|860|oeu:111393836|sulfate transporter 1, high-affinity		GO:0015116//sulfate transmembrane transporter activity;GO:0008271//secondary active sulfate transmembrane transporter activity	GO:0016021//integral component of membrane;GO:0005887//integral component of plasma membrane;GO:0005886//plasma membrane
6327	PSR89302.1	Eukaryotic initiation factor 4A-14 [Actinidia chinensis var. chinensis]	47112	0.522	1	1	-	0.8	0.739|0.957|0.736|0.885|1.103|0.869|0.598|0.747|0.574	0.17	9	0.009169	PSR89302.1	MAGVAPEGSQFDGRQYDTKMNELLGADGGDEFFTSYDEVHDSFDAMGLLENLLRGIYAYGFEKPSAIQQRGIVPFCKGLDVIQQAQSGTGKTATFCSGVLQQLDYGRVECQALVLAPTRELAQQIEKVMRALGDYLGVKVHACVGGTSVREDQRILSSGVHVVVGTPGRVFDMLRRQSLRPDYIKMFVLDEADEMLSRGFKDQIYDIFQLLPPKIQVGVFSATMPPEALEITRKFMNKPVRILVKRDELTLEGIKQFYVNVDKEEWKLETLCDLYETLAITQSVIFVNTRRKVDWLTDKMRSRDHTVSATHGDMDQNTRDIIMREFRSGSSRVLITTDLLARGIDVQQVSLVINYDLPTQPENYLHRIGRSGRFGRKGVAINFVTKEDERMLYDIQRFY…	96.377	0	KZV51860.1	eukaryotic initiation factor 4A-15-like [Dorcoceras hygrometricum]	95.41	0	sp|Q40468|IF415_TOBAC	Eukaryotic initiation factor 4A-15 OS=Nicotiana tabacum PE=2 SV=1	At3g13920	793	0	KOG0327	Translation initiation factor 4F, helicase subunit (eIF-4A) and related helicases	J	Translation, ribosomal structure and biogenesis	K03257|1|0.0|828|oeu:111376694|translation initiation factor 4A	GO:0010501//RNA secondary structure unwinding;GO:0006413//translational initiation;GO:0010468//regulation of gene expression	GO:0004004//ATP-dependent RNA helicase activity;GO:0004386//helicase activity;GO:0003676//nucleic acid binding;GO:0005524//ATP binding	GO:0005737//cytoplasm;GO:0005730//nucleolus
6334	PSR86797.1	Serine--glyoxylate aminotransferase [Actinidia chinensis var. chinensis]	44454	0.504	3	4	-	0.78	0.851|0.892|0.777|0.673|0.846|0.522|0.821|0.903|0.732	0.122	9	0.001976	PSR86797.1	MDYVYGPGRNHLFVPGPVNIPEQVIRAMNRNNEDYRSPAVPALTKTLLEDVKKIFKTTSGTPFIIPTTGTGAWESALTNTLSPGDRIVSFLIGQFSLLWIDQQQRLNFNVDVIESDWGQGANLEVLASKLAADSSHSIKAICIVHNETATGVTNNLAAVRKLLDHYQHPALFLVDGVSSICALDFRMDEWGVDVALTGSQKALSMPTGMGFVCASPKALEASQTAKSVRVFFDWKDYLKFYKMGTYWPYTPSIQLLYGLRAALDLIFEEGLDNVIARHSRLAKATRLAVEAWGLKNCTQKEEWYSDTVTAVLVPPYIDSSEIVRRGWKRYNLSLGLGLNKVAGKVFRIGHLGNLNELQLLGCLAGVEMVLKDVGYPVKLGSGVAAACAYLQNTIPMIPS…	93.267	0	OMO51281.1	Aminotransferase, class V/Cysteine desulfurase [Corchorus capsularis]	87.53	0	sp|Q56YA5|SGAT_ARATH	Serine--glyoxylate aminotransferase OS=Arabidopsis thaliana GN=AGT1 PE=1 SV=2	At2g13360	751	0	KOG2862	Alanine-glyoxylate aminotransferase AGT1	R	General function prediction only	K00830|1|0.0|788|jre:108994646|alanine-glyoxylate transaminase / serine-glyoxylate transaminase / serine-pyruvate transaminase [EC:2.6.1.44 2.6.1.45 2.6.1.51]		GO:0008483//transaminase activity	-
6341	PSR91058.1	HMG-Y-related protein like [Actinidia chinensis var. chinensis]	19930.5	0.214	2	2	-	0.78	0.774|0.708|0.915|0.713|0.681|0.826|0.794|0.681|0.899	0.089	9	0.0001323	PSR91058.1	MAAEESNSPPLQPPTAPSSLPQYPEMILAAIEALNDKDGSNKSSISKQIEVEYGELPAAHTTLLAHHLNKMKQSGQLVMVKNNYMRPDPNAPPRRGRGRPPKPKAPLPPDAALSPPRPRGRPPKPRDPLSPHETKPPSVGSGRPRGRPPKKAKTISAAPTATSPTGPSRGRGRPPKVKTPAVAPVEC	72.515	6e-64	XP_021594450.1	HMG-Y-related protein B-like [Manihot esculenta]	51.61	6e-52	sp|Q43386|HMGYA_ARATH	HMG-Y-related protein A OS=Arabidopsis thaliana GN=HMGA PE=1 SV=1	-	-	-	-	-	-	-	K11275|1|3e-46|153|peq:110027166|histone H1/5	GO:0006355//regulation of transcription, DNA-templated;GO:0006334//nucleosome assembly	GO:0003677//DNA binding	GO:0005634//nucleus;GO:0000786//nucleosome
6361	PSR98711.1	CSC1-like protein [Actinidia chinensis var. chinensis]	81665.3	0.203	10	22	-	0.83	0.959|0.764|0.973|0.892|0.698|0.842|0.825|0.635|0.838	0.112	9	0.002679	PSR98711.1	MDFSSFLTSLGTSFVIFVILMLLFSWLSGKPGNKVIYYPNRILRGMDPWEGGSRTRSPIAWIREALSSTERDVIAMSGVDSAVYFVFLSTVLGIFVLSGIVLLPVLLPVAATDTAKPTNGTSKGSFNDLDKLSMGHVEEGSSRLWAFLLATYWVSFVAYYLLWKAYHHVSDLRAAALMSPEVRGEQFAILVRDIPPPTEDQTRKEQVDTYFKTIYPDTFYRSMVVTDNQEVNKIWEDLEGYKKKLVRAEAIYAESKKTGKPEGIRPTHKTGFLGLIGNKVDSIEFYNEKINELIPKLEAEQKVTLREKQQSAALVFFSSRVTAATAAQSLHAKMVDTWTAMDAPEPRQMIWPNLPKKFYERVIRQYVVYAIVALTIFFYMIPIAFVSAFTTLENLRKYL…	77.178	0	XP_021659101.1	CSC1-like protein ERD4 [Hevea brasiliensis]	65.98	0	sp|Q9C8G5|CSCLD_ARATH	CSC1-like protein ERD4 OS=Arabidopsis thaliana GN=ERD4 PE=2 SV=1	At1g30360	983	0	KOG1134	Uncharacterized conserved protein	R	General function prediction only	K21989|1|0.0|1149|hbr:110649017|calcium permeable stress-gated cation channel			GO:0016021//integral component of membrane
6399	PSS01981.1	Translation machinery-associated protein [Actinidia chinensis var. chinensis]	21216	0.047	1	2	PSS15506.1	0.75	0.717|0.774|0.934|0.849|0.914|1.078|0.460|0.476|0.573	0.215	9	0.01295	PSS01981.1	MAEKPQPVRVLYCGVCGLPAEYCEFGPDFEKCKPWLVQNAPDLYPDLLKDANANEADKVSDQLQSTSIAVGTASSGSSSTSKPEEVKRLPGGKIKKKEKQEVIIEKVVRNKRKSITTVKGLELFGVKLSDASKKLGKKFATGASVVKGPTEKEQIDVQGDISYDIVEFITETWPDVPEAAIFFIEDGKKVPAA	86.01	1e-119	XP_015889131.1	PREDICTED: translation machinery-associated protein 22 isoform X2 [Ziziphus jujuba]	-	-	-	-	At5g11900	304	4e-106	KOG3239	Density-regulated protein related to translation initiation factor 1 (eIF-1/SUI1)	R	General function prediction only	-	GO:0002188//translation reinitiation;GO:0002192//IRES-dependent translational initiation of linear mRNA;GO:0001731//formation of translation preinitiation complex	GO:0043022//ribosome binding;GO:0003729//mRNA binding;GO:0003743//translation initiation factor activity	GO:0005840//ribosome;GO:0070992//translation initiation complex
6410	PSR89113.1	Protein of unknown function DUF1118 protein [Actinidia chinensis var. chinensis]	20803.2	0.101	1	2	-	0.82	1.266|0.885|0.849|0.860|0.681|0.577|0.925|0.667|0.638	0.21	9	0.02144	PSR89113.1	MGWCCSSSRGVPLIHSSPKKGTSRARKEQSVSLSTFFVKSMATEKPLPSATKTVGSAKISTVYPLGEKPRNSYSAASPPVKLLTRVEQLRLLTKAEKAGLLSAAEKFGLSLSTIEKLGLLSKAEGFGVLSAATDPGTPAALLALSLALLVLGPFCVYLVPEEYPWEVALQVVVALVSVVGGSAAFAASNLVSDLQKLS	73.958	8e-81	XP_021674904.1	uncharacterized protein LOC110660778 [Hevea brasiliensis]	-	-	-	-	-	-	-	-	-	-	-	-			GO:0016021//integral component of membrane
6429	PSS07686.1	Inactive leucine-rich repeat receptor-like protein kinase precursor [Actinidia chinensis var. chinensis]	79385	0.013	1	1	-	0.82	0.840|0.779|0.835|0.948|0.880|0.929|0.741|0.675|0.722	0.094	9	0.0006664	PSS07686.1	MGWPSFFLVLCLSWSFFIIDTHQLQSSQTQVLLQLKKHLEYPKQLEIWYNKSTDFCYLSSAQLNLTCQDNFVTELRILGDMPKKVTIFCGFSVPNQTLSEKFSMDSFVTTLARLTSLRALSLVSLGLWGPLPSKIHRLYALEYLDLSSNFLFGSIPHQISRLVKLQTLTLDGNFLNGTFPDWFVSLPNMTNLSLRDNHLSGVLLLASSVHRGQLVHLQHLDLSSNSLKGTPPASLFSLPNISYLNLASNMLSGSLPILLTCGIQLQFVDISNNRIKGLLPTCLSDESDKKVVKYGGNCLSSDVGDQHPESYCEEVKIIKRKESKVKNLVILVGVIGGFFLVFVLLAFGLLVVCRRYGPRGTSEQHLLKAVQDNSVNAFSSDVLTNARYISRIAKFGTEG…	66.287	0	CBI15635.3	unnamed protein product, partial [Vitis vinifera]	38.25	2e-142	sp|Q8LFN2|Y3037_ARATH	Probable inactive leucine-rich repeat receptor-like protein kinase At3g03770 OS=Arabidopsis thaliana GN=At3g03770 PE=2 SV=1	At5g28680	181	1e-47	KOG1187	Serine/threonine protein kinase	T	Signal transduction mechanisms	K04733|1|1e-46|180|dcr:108192961|interleukin-1 receptor-associated kinase 4 [EC:2.7.11.1]		GO:0005524//ATP binding;GO:0004672//protein kinase activity	GO:0016021//integral component of membrane
6436	PSR86583.1	Phenylalanine ammonia-lyase [Actinidia chinensis var. chinensis]	78385	0.215	6	12	-	0.83	0.878|0.629|0.817|0.842|0.625|0.772|1.107|0.797|1.040	0.162	9	0.01544	PSR86583.1	MDFSREIANGNGNGNGNGNGHLKVDMFCVGDPLNWGLAAESMKGSHVDEVKRMVAEYRRPAVRLGGASLTIGQVAAVAASDGGSTVELDEAARAGVKASSDWVMESMNKGTDSYGVTTGFGATSHRRTKQGAALQKELIRFLNAGIFGNGTESTHTLPHSATKAAMLVRINTLLQGYSGIRFEILEAITKLLNHNITPCLPLRGTITASGDLVPLSYIAGVLTGRPNSKCVGPNGEALNAAKAFSLAGIDGGFFELQPKEGLALVNGTAVGSGLASMVLFEANLLAVLSEVLSAIFAEVMQGKPEFTDHLTHKLKHHPGQIEAAAIMEHILDGSSYVKAAQKLHEMDPLQKPKQDRYALRTSPQWLGPLIEVIRSSTKMIEREINSVNDNPLIDVSRNK…	86.584	0	XP_010262867.1	PREDICTED: phenylalanine ammonia-lyase [Nelumbo nucifera]	85.06	0	sp|Q42667|PALY_CITLI	Phenylalanine ammonia-lyase OS=Citrus limon GN=PAL6 PE=2 SV=1	At2g37040	1226	0	KOG0222	Phenylalanine and histidine ammonia-lyase	Q	Secondary metabolites biosynthesis, transport and catabolism	K10775|1|0.0|1304|nnu:104601277|phenylalanine ammonia-lyase [EC:4.3.1.24]	GO:0009800//cinnamic acid biosynthetic process;GO:0006559//L-phenylalanine catabolic process	GO:0045548//phenylalanine ammonia-lyase activity	GO:0005737//cytoplasm
6448	PSS30017.1	Protein CURVATURE THYLAKOID 1D like [Actinidia chinensis var. chinensis]	23172.8	0.044	1	1	-	0.72	0.683|0.804|0.684|0.671|0.802|0.664|0.679|0.785|0.667	0.062	9	2.079e-06	PSS30017.1	MELCTSAATALTISSLPTHRLYTPNRCHLRWKTSLPLKQLSIDRINSGLLYYTNSSLRSTASEETSSGPTLYVEEEPEIVTVEDVQPVTKNSYAEIVQKDEVKEDSTVDGQAQAFEFLENLDIKLDSEDTYSILLFGSGALIALWLATAVVGAIDSIPLFPKLMEVVGLSYTLWFSTRYLIFKENRQELFAKIDEIKQQVLGVNDD	55.288	1e-72	XP_002274430.1	PREDICTED: protein CURVATURE THYLAKOID 1D, chloroplastic isoform X2 [Vitis vinifera]	43.72	6e-45	sp|Q8LDD3|CUT1D_ARATH	Protein CURVATURE THYLAKOID 1D, chloroplastic OS=Arabidopsis thaliana GN=CURT1D PE=1 SV=1	-	-	-	-	-	-	-	K01092|1|3e-15|77.4|boe:106307850|myo-inositol-1(or 4)-monophosphatase [EC:3.1.3.25]			GO:0009579//thylakoid;GO:0016021//integral component of membrane
6449	PSR84553.1	Late embryogenesis abundant protein [Actinidia chinensis var. chinensis]	27091.6	0.066	2	2	-	0.65	0.437|0.662|0.688|0.439|0.692|0.673|0.578|0.820|0.864	0.147	9	0.0004715	PSR84553.1	MQAAKNAAASAKETAANVAASAKSGMDKTKATVQEKVDRMTAHDPMQKEMATERKEGKIHQAEYKKQEAREHNAAAAHGEAGHHYTAGGGIQNHPIGGTTPQDYLTGPNMSGGYGTGRAGTNTGLGSNLAGGYGTGHTGANTGHGSNLSGGYGTGNTGPNTDPRSNLAEGYGTRPTGTNTGPGSNLSGGYETGPTGVNTGPGSNLSGGYETGSIEANTGSGSNLAGGYWTGPTEANTGLGLNPRATDAMYPADAELGTGLNPTRHTGGAGYN	66.265	7e-29	XP_013467666.1	seed maturation protein [Medicago truncatula]	66.67	1e-23	sp|Q9FG31|LEA46_ARATH	Late embryogenesis abundant protein 46 OS=Arabidopsis thaliana GN=LEA46 PE=2 SV=1	-	-	-	-	-	-	-	-	GO:0009409//response to cold;GO:0006970//response to osmotic stress;GO:0009793//embryo development ending in seed dormancy;GO:0009414//response to water deprivation		GO:0005829//cytosol
6455	PSR91649.1	Glycine cleavage system H protein [Actinidia chinensis var. chinensis]	17847.8	0.152	1	7	-	0.74	0.970|0.735|0.777|0.826|0.652|0.656|0.779|0.623|0.648	0.112	9	0.0002043	PSR91649.1	MALRMWASSTANAVRLSCASRPPLSPAFSLSRCFSSVLDGLKYATSHEWVKHEGSVATIGITHHAQDHLGEVVFVEVPESGGPVKKGSSFGAVESVKATSDVNSPISGEIVEVNTKLTESPGLINSSPYEEGWMIKVKPSNPSELESLMGPKEYTKFCEEEDAAH	89.091	4e-106	XP_002280707.1	PREDICTED: glycine cleavage system H protein, mitochondrial [Vitis vinifera]	85.45	7e-102	sp|Q39732|GCSH_FLAAN	Glycine cleavage system H protein, mitochondrial OS=Flaveria anomala GN=GDCSH PE=2 SV=1	At1g32470	266	2e-92	KOG3373	Glycine cleavage system H protein (lipoate-binding)	E	Amino acid transport and metabolism	K02437|1|7e-107|306|vvi:100259229|glycine cleavage system H protein	GO:0019464//glycine decarboxylation via glycine cleavage system		GO:0005960//glycine cleavage complex;GO:0005739//mitochondrion
6457	PSR99857.1	Isoamylase, partial [Actinidia chinensis var. chinensis]	77217	0.132	6	9	-	0.83	0.804|1.020|0.753|0.881|0.996|0.808|0.740|0.796|0.670	0.116	9	0.002741	PSR99857.1	LGVSELESGINFSIFSQHATRVTLCLSLPERGEHDKLDGGMVELTLDPHVNKTGDIWHICVEDLPRSDILYGYRVDGPRGWHQGHRFDSSIFLVDPYAKLVEGRRLFGDTSNKMAKFLGTYDFNSLPFNWGDNYKLPNIPEKDLVIYEMSIRAFTADESSGLDPSTRGSYLGVIKKIPHLVELGINAVELLPIFEFDELEFQRRPNPRDHLINTWGYSTINFFAPMSRYASAGGGPTNASREFKEMVKALHDAGIEVILDVVYNHTNEADDDNPYTISFRGIDNKVYYMVDLNNNGQLLNYTGCGNTLNCNHPVVMELILDSLRHWVVDYHVDGFRFDLASVLCRGTDGSPLDAPPLIRAIAKDPLLSRCKIIAEPWDCGGLYLVGKFPNWDRWAEWNG…	98.368	0	AOQ26243.1	ISA3 [Actinidia deliciosa]	77.6	0	sp|Q9M0S5|ISOA3_ARATH	Isoamylase 3, chloroplastic OS=Arabidopsis thaliana GN=ISA3 PE=1 SV=2	At4g09020	1108	0	KOG0470	1,4-alpha-glucan branching enzyme/starch branching enzyme II	G	Carbohydrate transport and metabolism	K01214|1|0.0|1226|mdm:103405334|isoamylase [EC:3.2.1.68]	-	-	-
6478	PSS32856.1	15-cis-zeta-carotene isomerase [Actinidia chinensis var. chinensis]	42766.4	0.058	2	5	-	0.7	0.736|0.812|0.658|0.755|0.786|0.656|0.647|0.688|0.557	0.08	9	1.458e-05	PSS32856.1	MATSLLFSNPFSCHFHNTTVVVASKTSTTRSNPLLVTSKSISPLIFLKKNNNNNHNRGLFLPKSMRNYRKIRVGASEIGETDEEEVVAGAVVGEDSADFDLGKQKISSWIYFCGVLGIVLFVLDVAWIDNSTGFGKPFIDAVSTLSASHEEVAMLMLTLIFAIVHSGLASFRDKGEKLIGERAYRVLFAGLSLPLAVSTVVYFINHRYDGVQLWQLQSVPGIHQVMWLSSFISFFFLYPSTFNLLEVAAVDKPKMHLWETGIMRITRHPQMVGQVIWCLAHTVWIGNSVAVAASIGLIGHHLFGVWNGDRRLAIRYGEDFEVLKSRTSVIPFAAILDGRQKLPKDYYKEFVRLPYLSITALTLAVYLAHPLMQAASFRLHW	71.429	0	XP_010245966.1	PREDICTED: 15-cis-zeta-carotene isomerase, chloroplastic [Nelumbo nucifera]	79.73	3e-178	sp|Q9SAC0|ZCIS_ARATH	15-cis-zeta-carotene isomerase, chloroplastic OS=Arabidopsis thaliana GN=Z-ISO PE=1 SV=1	-	-	-	-	-	-	-	K15744|1|0.0|542|nnu:104589367|zeta-carotene isomerase [EC:5.2.1.12]		GO:0016853//isomerase activity	GO:0016021//integral component of membrane
6484	PSS09769.1	Clavaminate synthase-like protein [Actinidia chinensis var. chinensis]	37094	0.348	10	18	-	0.79	0.682|0.949|0.587|0.786|1.036|0.661|0.748|1.022|0.650	0.17	9	0.006702	PSS09769.1	MPAASFFTEIPVPQQRTFHGDLFPTTLSPKPNTAKLVHWDVSSLAEAIKAHKPWLDSLLHKSGAILFRGFPVTTASDFNDVVEAFGFEELPYVGGAAPRTNVVGRVFTANESPPDRKIPFHHEMAQVPKFPAKVFFFCEVEPGKGGETPIVLSHVIYERMREKYPEFVERLEEQGLIYTRVLGEEDDPSSPIGSGWKSTFLTKDKSVAEERAAKLGMKLEWLEDGVKTVMGPIPAIKVDKSRQRKIWFNSMVAAYTGWEDARNDPVKAVTFGDGKPLPADIIYDCLNVLDEESVAIPWQKGDVLLLDNWAVLHSRRSFDPPRRVLASLCK	80.303	0	CDO97972.1	unnamed protein product [Coffea canephora]	72.64	0	sp|Q9LIG0|Y3136_ARATH	Clavaminate synthase-like protein At3g21360 OS=Arabidopsis thaliana GN=At3g21360 PE=1 SV=1	-	-	-	-	-	-	-	-		GO:0016491//oxidoreductase activity	-
6508	PSS11557.1	E3 ubiquitin-protein like [Actinidia chinensis var. chinensis]	87364.5	0.017	1	1	-	0.8	0.602|0.635|0.793|0.640|0.708|0.833|0.878|0.936|1.168	0.181	9	0.009206	PSS11557.1	MDESAVSSDPVIAFLLDEVVVKDWCKRTFKNILAELQGLYNLSVQEMKMRLSSLFKFSLKLAGISNVLEVLESSFKGTLSAQLHDLHHLQESILKSKQHLEVMIWCIRHQFLENVRSCYNNFASWRASVRERNSAAIKRSWPDPLNHSAESPGTNGSTLFIEDALSNIETEQVSTREMEWESEIASLQKDGSSSFFRSKIEGMTGCYPFENLRAAADVLFLHGSSDMVVAKQAIFLYYLFDRHWPKPEEEWRPVIDDFAATFNITRHSLLESFTFYLLDDHTDDALQEACCFLPEISGPTTHPKVAQVLLERQNPDAALMVLRWCGLDGGAQLVLLGEAVTAVRVRVECGLLTEAFMYQRTLCVKVKEKKLKHGSSRDSVGDQKEECRTWMDWVEALVT…	63.761	0	NP_001268014.1	E3 ubiquitin-protein ligase HOS1-like [Vitis vinifera]	50.32	0	sp|Q84JU6|HOS1_ARATH	E3 ubiquitin-protein ligase HOS1 OS=Arabidopsis thaliana GN=HOS1 PE=1 SV=1	-	-	-	-	-	-	-	K16278|1|0.0|1024|vvi:100241255|E3 ubiquitin-protein ligase HOS1 [EC:2.3.2.27]	-	-	-
6525	PSR96534.1	Pre-mRNA-splicing factor like [Actinidia chinensis var. chinensis]	29702.8	0.07	2	2	-	0.81	0.848|0.812|0.986|0.923|0.892|1.067|0.578|0.550|0.665	0.18	9	0.01884	PSR96534.1	MAMVNNGEILMLEAPPPSEHPSRPSWSTGAEIIDSLPYIDDDYGDPRVKKEVDRLVEDEMRRSSKKPSDFLNDLPPLPNFSFQNHPMLAREYERVRAGKPPMPLDMSRYGLEAPSINKRNDESAWKQAVQKAQRLLQHQVIRLENLDLMSKHGADVWKQHNQRLEAFLTRMQAQAVELNEKIEVVNRERKYHQQNTAYELNALSAQWKELCEKNIEIQAACAQIENQIEEMKKEATGRGWNLEDNKENGSLLHSEQ	78.74	7e-146	XP_010663657.1	PREDICTED: pre-mRNA-splicing factor SPF27 homolog [Vitis vinifera]	64.92	5e-115	sp|Q949S9|SPF27_ARATH	Pre-mRNA-splicing factor SPF27 homolog OS=Arabidopsis thaliana GN=MOS4 PE=1 SV=1	At3g18160_2	303	1e-104	KOG3096	Spliceosome-associated coiled-coil protein	S	Function unknown	K12861|1|1e-146|413|vvi:100254130|pre-mRNA-splicing factor SPF27	GO:0010204//defense response signaling pathway, resistance gene-independent;GO:0050832//defense response to fungus;GO:0009870//defense response signaling pathway, resistance gene-dependent;GO:0042742//defense response to bacterium;GO:0006397//mRNA processing		GO:0005730//nucleolus
6542	PSR89393.1	Calnexin like [Actinidia chinensis var. chinensis]	61448.5	0.233	1	1	-	0.82	0.611|0.863|1.234|0.565|0.797|1.106|0.521|0.707|1.009	0.251	9	0.0494	PSR89393.1	MEESKRRVYLQFGVLLLIGCFASQLFASSDPIFYESFDESYEGSWIVSEKEDYNGVWKHAKSEGHDDYGLLVSEKARKHAIVKELDEPVKLKDETIVLQFETRLQNGLECGGAYLKYLRPQEAGWTAKGFDNESPYSIMFGPDKCGGTNKVHFILKHKNPKSGEYVEHHLKYPPSVPSDKLTHVYTAILKPSNELRILIDGEEKKKANFLSSEDFEPALIPAKSIPDPDDKKPEDWDERANIPDPDAVKPDDWDEDAPMEIEDEEAVKPEGWLDDEPEEIDDPEATKPEDWDEEEDGEWESPKIDNPKCETAPGCGDWKRPMKTNPAYKGKWYAPQIDNPNYKGIWKPQEIPNPSYFELDTPDFEPIAAIGIEIWTMQDGILFDNVLIAGDETVAEVYR…	81.67	0	OVA17329.1	Calreticulin/calnexin [Macleaya cordata]	73.18	0	sp|P29402|CALX1_ARATH	Calnexin homolog 1 OS=Arabidopsis thaliana GN=CNX1 PE=1 SV=1	At5g61790	796	0	KOG0675	Calnexin	O	Posttranslational modification, protein turnover, chaperones	K08054|1|0.0|833|cann:107862096|calnexin	GO:0006457//protein folding	GO:0005509//calcium ion binding;GO:0051082//unfolded protein binding	GO:0016021//integral component of membrane;GO:0005783//endoplasmic reticulum
6545	PSR89293.1	Carotenoid cleavage dioxygenase [Actinidia chinensis var. chinensis]	64776.8	0.047	1	1	-	0.82	0.871|0.900|0.775|0.797|0.825|0.692|0.890|0.897|0.771	0.072	9	0.0001664	PSR89293.1	MEALSSSFLSSLSLSNLSLISPSQKPLLLRISAVRIEEKPPISTSTSTSTRRTSQVPSIPSTPQKPTSKRTPQPPPQPPSVAATILNAFDVLINTFIDPPVRQSVDPRHVLADNFAPVGELPPTPCAVVEGALPPCLDGGAYVRNGPNPQFLPRGPYHLFDGDGMLHAFKISGSGATLCSRFVKTYKYTIENQTGSPVIPNVFSGFNGLTAAAARGAITAARTLAGQFYPTNGIGLANTSLAIIGNNLYALGESDLPYAVKISDDGDIVTVGRCDFGGKLFMSMTAHPKTDPDTGESFAFRYGPIPPFLTFFRFDAAGNKMPDVPIFSLTTPSFLHDFAITKKYAVFADIQIGMNPMEMIVGNGSPVGTDPAKVSRLGVIPRYATDESEMRWFDVPGFN…	71.711	0	NP_001312446.1	probable carotenoid cleavage dioxygenase 4, chloroplastic [Nicotiana tabacum]	67.36	0	sp|O49675|CCD4_ARATH	Probable carotenoid cleavage dioxygenase 4, chloroplastic OS=Arabidopsis thaliana GN=CCD4 PE=1 SV=1	At4g19170	816	0	KOG1285	Beta, beta-carotene 15,15'-dioxygenase and related enzymes	Q	Secondary metabolites biosynthesis, transport and catabolism	K09840|1|0.0|892|nta:107791323|9-cis-epoxycarotenoid dioxygenase [EC:1.13.11.51]		GO:0046872//metal ion binding;GO:0016702//oxidoreductase activity, acting on single donors with incorporation of molecular oxygen, incorporation of two atoms of oxygen	-
6608	PSS30546.1	Sodium-coupled neutral amino acid transporter like [Actinidia chinensis var. chinensis]	50350.1	0.037	1	1	-	0.83	0.955|0.908|0.623|0.865|0.827|0.553|1.047|0.986|0.675	0.172	9	0.02152	PSS30546.1	MTIGSIKTVKEKKSRNRKQVVDEKVPLLPTKKEEDVGLDEFDGASFTGAVFNLSTTIVGAGIMALPATMKALGLVLGISMIIFMAFLAEASIEMLLRFSRAGKTISYGGVMGDAFGKYGRIFLQICVLVNNIGVLIVYMIIIGDVLSGTTSGGVHHAGVLEGWFGVYWWNRRTFILLVITLAVFAPLACLKRIDSLRFTSALSVALAVVFIIITVGIAIIKLINGSISMPRLLPNVTDLTSFLNLFTVVPVLVTAYICHFNVHSIDNELEDNTQIKAVVRSSLGLCATVYVTTSLFGFLLFGDATLDDVLANFDADLGIPFGYLLNDVVRVSYVAHLMLVFPIVFYPLRLNLDGLLFPSASPLALDNLRFASISSGLIALIFLGANFIPSIWDAFQFTG…	82.073	0	XP_021296672.1	probable sodium-coupled neutral amino acid transporter 6 [Herrania umbratica]	71.3	0	sp|Q9LI61|AVT6A_ARATH	Amino acid transporter AVT6A OS=Arabidopsis thaliana GN=AVT6A PE=2 SV=1	At3g30390	664	0	KOG1305	Amino acid transporter protein	E	Amino acid transport and metabolism	K14207|1|0.0|773|ghi:107891994|solute carrier family 38 (sodium-coupled neutral amino acid transporter), member 2			GO:0016021//integral component of membrane
6618	PSS06281.1	UPF0678 fatty acid-binding protein-like protein [Actinidia chinensis var. chinensis]	20467.6	0.059	1	1	-	0.75	0.802|0.757|0.685|0.930|0.881|0.792|0.683|0.636|0.575	0.115	9	0.0004121	PSS06281.1	MLPGSPGLEREGKRESKLGMDGSETSTPVRTPQPAAVHPAVEPLSYLLGSWRGQGEGGFPTITSFKYGEELHFAHPGNKPVIAYSQKTWKLNSGEPMHAESGYWRPKPDGTIEVVIAQSTGLAEVLKGTYNVEEKVVKLQSEVVANASKVREITRVFKLVDGELAYVVEMATSLTSLQPHLKASLRKL	83.007	3e-91	XP_021993454.1	UPF0678 fatty acid-binding protein-like protein At1g79260 [Helianthus annuus]	72.37	3e-78	sp|O64527|Y1926_ARATH	UPF0678 fatty acid-binding protein-like protein At1g79260 OS=Arabidopsis thaliana GN=At1g79260 PE=1 SV=1	At1g79260	231	6e-78	KOG3371	Uncharacterized conserved protein	S	Function unknown	-	-	-	-
6628	PSR97851.1	hypothetical protein CEY00_Acc24500 [Actinidia chinensis var. chinensis]	188350	0.007	1	1	-	0.73	0.741|0.796|0.825|0.771|0.830|0.839|0.571|0.590|0.611	0.11	9	0.0002612	PSR97851.1	MEDQMCLECLQRRIRADFSDNLTFSHAISDSALPFASAAVVQMSNSGSGEASPQFVLVYLPRCEYDCLGKFIDAYCPEDLEGEQSGEREGKTESVDGDGVAGDQTTSLDLQLKETLVSSYGGRTFLHGFGCASSTCKFSGRFSCLRTIASLAPIAQVGISSYSTFEELASNDYSGFVEDHILSSLILLIEGKATGRDSINLLSLIGIPSFDENGFPGCIRHPNIAPILGMLKTSDYINLVLPKTPYTLENILHYSPNALKSELHIKFLIYQLLSALVHMHGLGVAHGNICPSNVMLNDLCWSWLRIIDKPLLSSKLSERSKECFPTPTSRIGCCNVVCPSQGIYSDLKLSRPIDWHSAFNRWWRGELSNFEYLLVLNRLAGRRWGDHTFHTVMPWVIDF…	71.667	0	XP_010649665.1	PREDICTED: protein GFS12 isoform X1 [Vitis vinifera]	57.7	0	sp|F4JY12|GFS12_ARATH	Protein GFS12 OS=Arabidopsis thaliana GN=GFS12 PE=1 SV=1	At5g18530	1761	0	KOG1786	Lysosomal trafficking regulator LYST and related BEACH and WD40 repeat proteins	TU	Signal transduction mechanisms;Intracellular trafficking, secretion, and vesicular transport	K17601|1|0.0|2488|vvi:100266683|WD repeat-containing protein 81	GO:0009816//defense response to bacterium, incompatible interaction;GO:0006623//protein targeting to vacuole	GO:0005524//ATP binding;GO:0004672//protein kinase activity	GO:0005622//intracellular
6642	PSR91881.1	Protein like [Actinidia chinensis var. chinensis]	40183.4	0.244	2	2	-	0.74	0.676|0.775|0.768|0.763|0.877|0.873|0.605|0.646|0.633	0.101	9	0.000122	PSR91881.1	MGIYLSTPKTEKFSEDGENAKLRYGLSSMQGWRATMEDAHAAYPDLDTSTSFFGVYDGHGGKVVAKFCAKFLHQQVLKNEAYSSGDIGTSVQKAFFRMDEMMRGQRGWRELAVLGDKINKFTGMIEGLIWSPRSGEGNDLMDDWAFEEGPHSDFTGPTSGSTACVAIIRNNQVVVANAGDSRCVISRKGQAYNLSKDHKPELEVERERILKAGGFIHAGRVNGSLNLARAIGDMEFKQNKFLPAEKQIVTANPDINTVELCDDDDFLVLACDGIWDCMSSQQLVDFIHEQLKTENKLSVVCERVLDRCLAPSTAGGEGCDNMTMIIVQFNKPIQSTAAEEKTSTSDQADTDESKPAETESS	87.778	0	XP_010265531.1	PREDICTED: probable protein phosphatase 2C 60 isoform X1 [Nelumbo nucifera]	79.33	0	sp|Q9SZ53|P2C60_ARATH	Probable protein phosphatase 2C 60 OS=Arabidopsis thaliana GN=At4g31860 PE=2 SV=1	At4g31860	613	0	KOG0698	Serine/threonine protein phosphatase	T	Signal transduction mechanisms	K17499|1|0.0|676|nnu:104603251|protein phosphatase 1G [EC:3.1.3.16]		GO:0046872//metal ion binding;GO:0004722//protein serine/threonine phosphatase activity	-
6649	PSS05866.1	Phosphoenolpyruvate carboxylase [Actinidia chinensis var. chinensis]	110547	0.449	3	4	-	0.83	0.685|0.838|0.688|0.818|0.977|0.928|0.816|0.776|0.945	0.105	9	0.00198	PSS05866.1	MANRNLEKLQSIDAQLRLLVPGKVSEDDKLVEYDALLLDRFLDILQDLHGEDLRETVQECYELSAEYEGKHDPNKLDDLGSVLTSLDPGDSIVIAKSFSHMLNLANLAEEVQIAYRRRIKLKKGDFADENSATTESDIEETLKRLVGELKKSPEEVFDALKNQTVDLVFTAHPTQSVRRSLLQKHGRIRNCLTQLYAKDITPDDKQELDEALQREIQAAFRTDEIRRTPPTPQDEMRAGMSYFHETIWKGVPKFLRRVDTALKNIGINERVPYNAPLIQFSSWMGGDRDGNPRVTPEVTRDVCLLARMMASNLYYSQIEDLMFEMSMWRCSDELRVRADELHRSSKRDAKHYIEFWKQVPPSEPYRVILGDVRDKLYQTRERSRHLLANGISDIPEEAT…	92.953	0	GAV91127.1	PEPcase domain-containing protein [Cephalotus follicularis]	91.31	0	sp|Q9FV65|CAPPC_FLATR	Phosphoenolpyruvate carboxylase 2 OS=Flaveria trinervia GN=PPCC PE=1 SV=1	-	-	-	-	-	-	-	K01595|1|0.0|1843|mesc:110601178|phosphoenolpyruvate carboxylase [EC:4.1.1.31]	GO:0006099//tricarboxylic acid cycle;GO:0015977//carbon fixation	GO:0008964//phosphoenolpyruvate carboxylase activity	-
6686	PSR94804.1	Glutathione peroxidase [Actinidia chinensis var. chinensis]	19416.1	0.169	2	2	-	0.82	0.958|0.918|0.719|0.981|0.936|0.718|0.807|0.753|0.589	0.135	9	0.006181	PSR94804.1	MKMGASKSVPQESLHEFTVKDYRGKDVDLSIYKGKILLVVNVASKCGFTDSNYTQLTELYNKYKDKGFEVLAFPCNQFLRQEPGTSVEAHEFACTRYKAEYPIFQKLRCNGPNTAPVYKFLKASKGGILGPRIKWNFTKFLVGKEGKVISRYGTATGPLAIEGDIQKALGEV	83.041	4e-103	AFF18778.1	glutathione peroxidase [Dimocarpus longan]	74.85	9e-95	sp|Q8L910|GPX4_ARATH	Probable glutathione peroxidase 4 OS=Arabidopsis thaliana GN=GPX4 PE=2 SV=1	At2g48150	263	5e-91	KOG1651	Glutathione peroxidase	O	Posttranslational modification, protein turnover, chaperones	K00432|1|1e-103|298|nta:107811982|glutathione peroxidase [EC:1.11.1.9]	GO:0006979//response to oxidative stress	GO:0004602//glutathione peroxidase activity	-
6719	PSS01920.1	2-oxoglutarate-Fe(II) type oxidoreductase [Actinidia chinensis var. chinensis]	38561.4	0.063	1	1	-	0.77	0.798|0.816|1.076|0.777|0.795|1.019|0.502|0.492|0.647	0.201	9	0.01209	PSS01920.1	MEISKNEALENVSVLNCIDLSDPYLQNSVSSLKQACLDFGFFYVINHGIRQEFMDEVFYQSKRFFDLPVGEKMKLLRNKKHRGYTPILDEHLDPDNQIHGDFKEGYYIGVEVPEKDPDAQKPFFGPNVWPTDDILPGWRETMEKYHCEALKVAKAITRLIALALNLEIDYFDREEIFGKPIAVLRLLYYEGRISDPVKGIYGAGAHSDFGLVTLLATDDVYGLQICKDKDAKPQKWEFVAPLKGAFIVNLGDLLERWSNCIFRSTLHRVVGNGQERYSIAYFVEPNHDCLVECLPTCKSKENPPKFPPIKCETYLLQRYKDTHADLNSYNK	79.077	0	XP_021276186.1	2-oxoglutarate-Fe(II) type oxidoreductase isoform X2 [Herrania umbratica]	34.53	2e-37	sp|Q84MB6|DIOX2_ARATH	Probable 2-oxoglutarate-dependent dioxygenase At3g50210 OS=Arabidopsis thaliana GN=At3g50210 PE=2 SV=1	At1g35190	484	4e-173	KOG0143	Iron/ascorbate family oxidoreductases	QR	Secondary metabolites biosynthesis, transport and catabolism;General function prediction only	K06901|1|3e-75|253|apro:F751_5469|putative MFS transporter, AGZA family, xanthine/uracil permease!K04124|2|3e-31|124|pxb:103962027|gibberellin 3beta-dioxygenase [EC:1.14.11.15]!K05278|3|3e-31|124|jre:108981974|flavonol synthase [EC:1.14.20.6]		GO:0046872//metal ion binding;GO:0051213//dioxygenase activity;GO:0016491//oxidoreductase activity	-
6734	PSS28716.1	Ubiquitin-conjugating enzyme E2 [Actinidia chinensis var. chinensis]	17419.6	0.112	1	1	-	0.8	0.976|0.878|0.909|0.861|0.784|0.788|0.723|0.636|0.658	0.115	9	0.001477	PSS28716.1	MSTPARKRLMRDFKRLQQDPPAGISGAPQDNNIMLWNAVIFGPDDTPWDGGTFKLTLQFSEDYPNKPPTVRFVSRMFHPNIYADGSICLDILQNQWSPIYDVAAILTSIQSLLCDPNPNSPANSEAARMFSENKREYNRRVREIVEQSWTAD	99.342	5e-111	XP_016736213.1	PREDICTED: ubiquitin-conjugating enzyme E2 2 isoform X1 [Gossypium hirsutum]	98.03	6e-112	sp|P35130|UBC2_MEDSA	Ubiquitin-conjugating enzyme E2 2 OS=Medicago sativa GN=UBC2 PE=2 SV=1	At2g02760	313	2e-111	KOG0419	Ubiquitin-protein ligase	O	Posttranslational modification, protein turnover, chaperones	K10573|1|1e-111|317|egu:105047918|ubiquitin-conjugating enzyme E2 A [EC:2.3.2.23]	GO:0006281//DNA repair;GO:0043161//proteasome-mediated ubiquitin-dependent protein catabolic process;GO:0016574//histone ubiquitination;GO:0000209//protein polyubiquitination	GO:0031625//ubiquitin protein ligase binding;GO:0061630//ubiquitin protein ligase activity;GO:0016874//ligase activity;GO:0005524//ATP binding	GO:0005737//cytoplasm
6781	PSS32685.1	Oocyte zinc finger protein like [Actinidia chinensis var. chinensis]	9505.33	0.108	1	1	PSS34670.1	0.74	0.998|0.751|0.710|0.862|0.657|0.598|0.847|0.620|0.585	0.141	9	0.0008222	PSS32685.1	MVRIMAANTREKVASLVNLAKFAMDIPSKLERLRPLKNELSQADSVLLRVFPLLLDLHTDRFSPVRKFITEYALLTPIHIKTL	59.259	5e-20	XP_020237335.1	symplekin isoform X2 [Cajanus cajan]	-	-	-	-	At5g01400	55.8	3e-10	KOG1895	mRNA cleavage and polyadenylation factor II complex, subunit PTA1	A	RNA processing and modification	K06100|1|1e-20|88.6|ccaj:109816666|symplekin	-	-	-
6783	PSS26115.1	CBS domain-containing protein [Actinidia chinensis var. chinensis]	26557.9	0.317	1	3	-	0.77	0.922|0.867|0.789|0.883|0.830|0.735|0.698|0.633|0.576	0.118	9	0.0009318	PSS26115.1	MDSIVFADPHALPRLPVASSAAHHHQLPCTVAYQIVLRPRPFCISRRSRSRLRLQSPFVVSANSSGTTNSTPTRSGVYTVGDFMTRKEDLHVVKTTTTVDEALDALVEKRITGFPVIDDDWKLVGVVSDYDLLALDSISGGGHADANVFPDVDSSWKTFNKIQRLLSKTNGKVVGDLMTPAPLVVRETTNLEDAVRLLLETKYRRLPVVDGDGRLVGIITRGNVVRAALQIKHANERYHN	71.946	7e-108	XP_019232861.1	PREDICTED: CBS domain-containing protein CBSX1, chloroplastic-like isoform X3 [Nicotiana attenuata]	72.96	3e-99	sp|O23193|CBSX1_ARATH	CBS domain-containing protein CBSX1, chloroplastic OS=Arabidopsis thaliana GN=CBSX1 PE=1 SV=2	-	-	-	-	-	-	-	K14595|1|5e-83|265|mtr:MTR_4g485640|abscisate beta-glucosyltransferase [EC:2.4.1.263]	GO:0045454//cell redox homeostasis		GO:0009507//chloroplast
6789	PSS17358.1	DnaJ protein like [Actinidia chinensis var. chinensis]	37175.6	0.037	1	2	PSS19599.1	0.8	0.673|0.727|0.871|0.842|0.907|1.062|0.631|0.658|0.786	0.14	9	0.002869	PSS17358.1	MEVSTSRAEAERLLGIAEKFLQGKDFTGSRDFAILAQETEPLLDGSDQILTVADVLIASQRRVNNHHDWYAVLQVDRRSSDDLDLVKKQYRRLAFLLHPDKNKFAFADVAFRIVAEAWAVISDPGKKLIFDNELNLFSKVDLVAMKNQRGQQQKHQNHHQQNQNQVRREHEDQQQKLPLRRRSPWAAAAERGSSSGGEEPREGNFWTACPYCYHLYEYPRAFADTCLRCQNCQRAFHAASLPSLPPFVPGKEAYYCCWGVFPMTFMVANGEGGNKAGVPNWMPAPAPVVQDDGNGFVDVPPVNAAPVVAGTGTGTKKRGRPRKNVQVL	55.132	4e-121	XP_010107680.1	Protein HLJ1 [Morus notabilis]	30.85	4e-08	sp|Q9FH28|DNJ49_ARATH	Chaperone protein dnaJ 49 OS=Arabidopsis thaliana GN=ATJ49 PE=2 SV=2	At5g64360	174	4e-50	KOG0714	Molecular chaperone (DnaJ superfamily)	O	Posttranslational modification, protein turnover, chaperones	K09511|1|1e-36|140|egu:105048670|DnaJ homolog subfamily B member 5!K09518|4|8e-22|95.9|eus:EUTSA_v10027481mg|DnaJ homolog subfamily B member 12			GO:0005829//cytosol
6826	PSR91735.1	Eukaryotic initiation factor 4A-14 [Actinidia chinensis var. chinensis]	47181.1	0.529	2	4	-	0.79	0.900|0.860|0.722|0.954|0.702|0.623|0.872|0.761|0.709	0.111	9	0.0008168	PSR91735.1	MAGLAPEGSQFDARQYDNKMIELLGADGGEEFFTSYDEVHESFDAMGLQENLLRGIYAYGFEKPSAIQQRGIVPFCKGLDVIQQAQSGTGKTATFCSGILQQLDYGKVECQALVLAPTRELAQQIEKVMRALGDYLGVKVHACVGGTSVREDQRILSSGVHVVVGTPGRVFDMLRRQSLRPDYIKMFVLDEADEMLSRGFKDQIYDIFQLLPPNIQVGVFSATMPPEALEITRKFMNKPVRILVKRDELTLEGIKQFYVNVDKEEWKLETLCDLYETLAITQSVIFVNTRRKVDWLTDKMRSRDHTVSATHGDMDQNTRDIIMREFRSGSSRVLITTDLLARGIDVQQVSLVINYDLPTQPENYLHRIGRSGRFGRKGVAINFVTKEDERMLYDIQRFY…	95.894	0	CDP08290.1	unnamed protein product [Coffea canephora]	94.93	0	sp|P41382|IF410_TOBAC	Eukaryotic initiation factor 4A-10 OS=Nicotiana tabacum PE=2 SV=1	At3g13920	791	0	KOG0327	Translation initiation factor 4F, helicase subunit (eIF-4A) and related helicases	J	Translation, ribosomal structure and biogenesis	K03257|1|0.0|830|oeu:111376694|translation initiation factor 4A	GO:0010501//RNA secondary structure unwinding;GO:0006413//translational initiation;GO:0010468//regulation of gene expression	GO:0004004//ATP-dependent RNA helicase activity;GO:0004386//helicase activity;GO:0003676//nucleic acid binding;GO:0005524//ATP binding	GO:0005737//cytoplasm;GO:0005730//nucleolus
6829	PSS14524.1	G-type lectin S-receptor-like serine/threonine-protein kinase [Actinidia chinensis var. chinensis]	91426.6	0.029	1	1	-	0.8	0.657|0.790|0.729|0.787|0.927|0.870|0.744|0.894|0.824	0.086	9	0.0002589	PSS14524.1	MACALPHILFFLLFLQPLSTVAQTNGTVATGASITATDKAIPWLSPSEDFAFGFKQLQDKDLFVLSIWYYKIPDQTIVWYANPGVPVPRGSKVVITANRGLLLSDPQGGELWNSETILNDVTHGFMNDSGNFVLVRSDSVTLWESFKYPTDTMLPTQIMESGGVLFSRQTETNFSRGRFQLRLLGDGNLVLNTRELATGFTYDAYYWSNTYDADNTSNRGYQVIFNETGYLFVLRRNNRRVDLTPKLAVPTSDYYHRVTLDFDGVLNQYYHPKTATGNSKWTALWSQPDNICVDIVGKEGIGACGFNSICTLNDNGRPECSCPEGFSLVDPNDKYGSCKPSFTPSCEEYDRGSAEDVYGLVELIDTDWPLSDYEQLRPSSEDMCRKTCLQDCFCAVSIF…	62.531	0	XP_011025239.1	PREDICTED: G-type lectin S-receptor-like serine/threonine-protein kinase RLK1 isoform X1 [Populus euphratica]	48.81	0	sp|Q39202|RLK1_ARATH	G-type lectin S-receptor-like serine/threonine-protein kinase RLK1 OS=Arabidopsis thaliana GN=RLK1 PE=2 SV=2	At3g24540	222	2e-63	KOG1187	Serine/threonine protein kinase	T	Signal transduction mechanisms	K04733|1|0.0|894|hbr:110661300|interleukin-1 receptor-associated kinase 4 [EC:2.7.11.1]	GO:0006468//protein phosphorylation;GO:0048544//recognition of pollen	GO:0004674//protein serine/threonine kinase activity;GO:0005524//ATP binding;GO:0008830//dTDP-4-dehydrorhamnose 3,5-epimerase activity	GO:0016021//integral component of membrane;GO:0005886//plasma membrane
6853	PSS29506.1	1-phosphatidylinositol phosphodiesterase [Actinidia chinensis var. chinensis]	36856.7	0.035	1	1	-	0.76	0.750|0.808|0.959|0.653|0.714|0.815|0.650|0.677|0.803	0.1	9	0.0001574	PSS29506.1	MGGQVSTQMEKRKAISTEKKTLCDLQQGCGKEFPGCDYRPPDRKNWMSGLNPEKVHLNKIVWPGTHDSATNKIGIPFVSRPFAQCQSLSIYHQLVRGTRVIDIRVQEDRRVCHGILLTYGVDVVLNDIKKFFSETQSEIIILEIRTEFGHEDPPEFDKYLEEQLGEFLIHQDDHVFEKTIAELLPKRVICVWKPRKSPQPKPGGPLWSGGYLKDNWIDTDLPSTKFESNLKYLGEQQPVVSRKFFYRVENTVTPQADNPVLCVRPVTGRIHGYARLFITQCFSRGCADRLQILSTDFIDEDFVDACVGLTQARVEGKV	85.22	0	XP_018823822.1	PREDICTED: PI-PLC X-box domain-containing protein DDB_G0293730-like [Juglans regia]	-	-	-	-	At4g38690	547	0	KOG4306	Glycosylphosphatidylinositol-specific phospholipase C	T	Signal transduction mechanisms	K01771|1|3e-100|296|lja:Lj1g3v3343840.1|1-phosphatidylinositol phosphodiesterase [EC:4.6.1.13]	GO:0006629//lipid metabolic process	GO:0008081//phosphoric diester hydrolase activity	-
6860	PSR84905.1	Succinate--CoA ligase [ADP-forming] subunit alpha-2 like [Actinidia chinensis var. chinensis]	35909.7	0.308	1	4	-	0.76	0.832|0.864|0.903|0.870|0.907|1.003|0.492|0.482|0.502	0.208	9	0.01541	PSR84905.1	MARHAKRLITDLSSTLCPKSATFSAPSSSYALNQSRQFAAAPPPPPAVFVDKNTRVICQGITGKNGTFHTEQAIEYGTKMVGGVTPKKGGTEHLGLPVFNSVAEAKAETKANASVIYVPPPFAAAAIMEAVEAELDLVVCITEGIPQHDMVRVKAALNKQSKTRLIGPNCPGIIKPGECKIGIMPGYIHKPGRIGIVSRSGTLTYEAVFQTTVVGLGQSTCVGIGGDPFNGTNFVDCVEKFIADPQTEGIILIGEIGGTAEEDAAALIKESGTEKPIVAFIAGLTAPPGRRMGHAGAIVSGGKGTAQDKIKTLREVGATVVESPAKIGSAMLDVFRKRGFV	90.343	0	XP_018849296.1	PREDICTED: succinate--CoA ligase [ADP-forming] subunit alpha-1, mitochondrial [Juglans regia]	82.9	0	sp|P68209|SUCA1_ARATH	Succinate--CoA ligase [ADP-forming] subunit alpha-1, mitochondrial OS=Arabidopsis thaliana GN=At5g08300 PE=1 SV=1	At5g08300	576	0	KOG1255	Succinyl-CoA synthetase, alpha subunit	C	Energy production and conversion	K01899|1|0.0|599|jre:109012218|succinyl-CoA synthetase alpha subunit [EC:6.2.1.4 6.2.1.5]	GO:0006099//tricarboxylic acid cycle	GO:0004775//succinate-CoA ligase (ADP-forming) activity;GO:0048037//cofactor binding;GO:0000166//nucleotide binding	GO:0005739//mitochondrion
6894	PSS00045.1	Protein S-acyltransferase [Actinidia chinensis var. chinensis]	46903.3	0.03	1	1	-	0.79	0.881|0.743|0.891|0.810|0.736|0.830|0.753|0.652|0.780	0.076	9	6.969e-05	PSS00045.1	MAKRVYQTWKGSNKFFLGGRLIFGPDAWSLLVTLLLIIVPVTIFCVFVAWHLRHAFSPYNAGYAVLVAAIVFTIYVLVILFLTSARDPGIVPRNLHPPEEEFRYDTSASVEVGGRQTPSLQFPRTKEVMVNGIPVKVKYCDTCMLYRPPRCSHCSICDNCVERFDHHCPWVGQCIGLRNYRYFFCFVSSSTLLCIYVFSMSAFYIKVLMDDHQGTVWKAMKESPASVILMAYCFISLWFVGGLTGFHLYLIGTNQTTYENFRYRADNRVGVYDLGCLNNFLEVFCTKVKPSRNNFRAFVQEETQRPPFPTTRGTEVEDLGDARRAKIEDDLEIGGDLLKISQRHNIEDIDSDIRSRGSDVPHHNSSEADSVLGSDCGPHTVQSNTRHSSWGRSEGWEIA…	84.198	0	XP_015577975.1	PREDICTED: protein S-acyltransferase 8 [Ricinus communis]	67.82	0	sp|Q9SB58|ZDH19_ARATH	Protein S-acyltransferase 8 OS=Arabidopsis thaliana GN=PAT08 PE=1 SV=2	At5g50020	538	0	KOG1311	DHHC-type Zn-finger proteins	R	General function prediction only	K16675|1|0.0|716|rcu:8283181|palmitoyltransferase ZDHHC9/14/18 [EC:2.3.1.225]		GO:0019706//protein-cysteine S-palmitoyltransferase activity	GO:0016021//integral component of membrane
6905	PSR90964.1	hypothetical protein CEY00_Acc28249 [Actinidia chinensis var. chinensis]	41320.2	0.183	5	7	-	0.79	0.749|0.830|0.722|0.790|0.869|0.687|0.837|0.908|0.748	0.073	9	5.887e-05	PSR90964.1	MASYSPLCTSFHSTASASSSSTHCLLRRLPLPSSSSSLNSFPTTTTTKRRIRSINLVTNRCRDSRFSVSAARNTTSTNPSGGNSDGKRKETERELQELKKKEQEEEEQEIEEELPWIQEKALDLVEFTGSVTQAIPGPRVGRSSLPWMLAVPLAYVGITFVIAFVKTVRKFNSPKEIRRKLVNKNAMLCKSIDELLEKGRDGVQQSALKGLMLKTGFGMEEILRKYIRYALNEKPFNPEFVVNLIQLRKASLLDDSQLAEILNEISRRIVKDKGPVVMDMSGYSEKGFKRKLAVQSLFGKIYYLSELPEFCSRDSSLVVKEIFGVADEDAEKLRLHTLSEAGDIDLLEKMMDDSDSEDSSDGTSNAP	83.858	6e-156	CDP16891.1	unnamed protein product [Coffea canephora]	-	-	-	-	At5g08540	380	2e-129	KOG0154	RNA-binding protein RBM5 and related proteins, contain G-patch and RRM domains	R	General function prediction only	K08835|1|9e-11|64.3|bvg:109135768|serine/threonine-protein kinase OSR1/STK39 [EC:2.7.11.1]			GO:0016021//integral component of membrane
6912	PSR89386.1	4-coumarate--CoA ligase [Actinidia chinensis var. chinensis]	59856.7	0.057	1	1	-	0.71	0.734|1.043|0.549|0.863|1.204|0.629|0.457|0.620|0.326	0.281	9	0.01687	PSR89386.1	METAKSQHRDVIFRSKLPDIHIPKHLPLHSYCFQNISKFQSRPCLIDGPTGKIFTYADVEIAARKVAAGLHGIGIRQHETIMLLLPNSPEFVFAFLGASFLGATTTMANPFFTPAEVVKQAKASNSKLIVTQACYVEKVKDYAMEKNAKVMCIDAPPDGCSHFSDLTQADERDVPEVEISPDDVVALPYSSGTTGLPKGVMLTHKGLVTSVAQQVDGDNPNLYMHSDDVMICVLPLFHIYSLNSVLLCGLRVGAAILLVQKFEIGSFLGMMERYKVTIGPFVPPIVLAIAKSPVVDDYDLSAVRTVMSGAAPLGRELEEAARAKFPNAKLGQGYGMTEAGPLLAMCLAFAKEPFEIKSGACGTVVRNAEMKIVDPETGDSLPRNQPGEICIRGDQIMKG…	82.505	0	AEO52694.1	4-coumarate:CoA ligase [Petunia x hybrida]	80.96	0	sp|O24145|4CL1_TOBAC	4-coumarate--CoA ligase 1 OS=Nicotiana tabacum GN=4CL1 PE=2 SV=1	At3g21240	816	0	KOG1176	Acyl-CoA synthetase	I	Lipid transport and metabolism	K01904|1|0.0|939|nsy:104245015|4-coumarate--CoA ligase [EC:6.2.1.12]	GO:0009698//phenylpropanoid metabolic process;GO:0008152//metabolic process	GO:0016207//4-coumarate-CoA ligase activity;GO:0016874//ligase activity;GO:0005524//ATP binding	-
6928	PSR85221.1	DNA-directed RNA polymerases II and IV subunit 5A like [Actinidia chinensis var. chinensis]	24039.6	0.091	2	2	-	0.8	1.026|0.537|0.861|0.994|0.620|0.862|0.925|0.498|0.841	0.196	9	0.02057	PSR85221.1	MSVPDDEEATKLFRVRRTALQMLDDRGYAVKESDLNMTKQKFVEQFGANVKREDLLIETEKRDDASNRIFVIFPEVQKKVGCAIVKDCIVRMHAQNVSRAILVVQQALTPQAKAAVNEVNRKFQIETFQEAELLVNVTEHYLVPKHEVLSTEQRQELFQKYNVKSIQLPRMLVTDPVARYFGLKPGQVVKITRPSETAGTYITYRCVV	58.824	1e-84	XP_002284107.1	PREDICTED: DNA-directed RNA polymerases II and IV subunit 5A [Vitis vinifera]	55.17	7e-81	sp|O81098|RPB5A_ARATH	DNA-directed RNA polymerases II and IV subunit 5A OS=Arabidopsis thaliana GN=NRPB5A PE=1 SV=1	At3g22320	239	1e-80	KOG3218	RNA polymerase, 25-kDa subunit (common to polymerases I, II and III)	K	Transcription	K03013|1|2e-85|254|vvi:100259318|DNA-directed RNA polymerases I, II, and III subunit RPABC1	GO:0006366//transcription from RNA polymerase II promoter;GO:0006360//transcription from RNA polymerase I promoter;GO:0006351//transcription, DNA-templated;GO:0006383//transcription from RNA polymerase III promoter	GO:0003677//DNA binding;GO:0003899//DNA-directed 5'-3' RNA polymerase activity	GO:0005736//DNA-directed RNA polymerase I complex;GO:0005634//nucleus;GO:0005665//DNA-directed RNA polymerase II, core complex;GO:0005666//DNA-directed RNA polymerase III complex
6972	PSS26598.1	Aldehyde dehydrogenase family 3 member like [Actinidia chinensis var. chinensis]	62565.5	0.15	7	9	-	0.8	0.924|0.809|0.768|0.959|0.799|0.690|0.875|0.706|0.642	0.108	9	0.0008349	PSS26598.1	MSLISIDLVALHCSHGLGILNRALRNKSRSSIQIQAQQTRLSFPQRRRSNWRFLSTHSCSATLSVMAEEEKEAFDADRAGALVKELRECFDNGKTKSYDWRVSQLESIAKMVDEREKDILAALHQDLSKPEHEAFVSEISLTKGSCKLALQELKSWMMPEKVKTSMTTYPSSAKIVSEPLGVVLVISTWNYPFMLSLEPVIGAIAAGNAVVLKPSEIAPATSSLLAKLLEEYVDNTAIRVVEGAVAETSALLEQKWDTIFYTGSGRVGRIIMSAAARHLTPVILELGGKCPAVVDSDVNIEVGNSIYHTSGVMVAVRRIIAGKWGCNSGQACIAPDYLITAKAFAPKLIDTLRSELKVFFGENPMESKDLSRIVNLYHFKRLSKLMDEDKVSDMKVLGG…	70.893	0	CBI21614.3	unnamed protein product, partial [Vitis vinifera]	66.54	0	sp|Q8W033|AL3I1_ARATH	Aldehyde dehydrogenase family 3 member I1, chloroplastic OS=Arabidopsis thaliana GN=ALDH3I1 PE=1 SV=2	At1g44170	672	0	KOG2456	Aldehyde dehydrogenase	C	Energy production and conversion	K00128|1|0.0|810|vvi:100266331|aldehyde dehydrogenase (NAD+) [EC:1.2.1.3]	GO:0006081//cellular aldehyde metabolic process	GO:0004030//aldehyde dehydrogenase [NAD(P)+] activity	-
6984	PSR96092.1	Serine-threonine kinase receptor-associated protein [Actinidia chinensis var. chinensis]	39862.4	0.366	1	1	-	0.81	0.779|0.840|0.798|0.805|0.867|0.806|0.790|0.831|0.789	0.029	9	9.23e-08	PSR96092.1	MDKRKVAAPLVCHGHSRPVVDLNYSPVTPDGFFLISASKDSTPMLRNGETGDWIGTFEGHKGAVWSCCLDINALRAASGSADFTAKLWDALTGDVLHSFDHKHIVRACAFSEDTHHLLTGGFEKILRIFDLNRPDAPPREVDNSPGSVRTVAWLHSDQTIISSCSDIGGARLWDLRSGKIVQTLETKSPVTSAEVSQDGRYITTADGSTVKFWDANHFGLVKSYDMPCNVESASLEPKLGNKFIAGGEDMWVRVFDFHTGEEIGCNKGHHGPVHCVRFSPGGESYASGSEDGTIRIWQTGPLNHNENDISENGQTERLKVAADEVTLKIEGFHITEEEKAAEQENIDGFRAAEEGKADAQL	87.536	0	GAV69171.1	WD40 domain-containing protein [Cephalotus follicularis]	30.82	6e-37	sp|Q38884|EIF3I_ARATH	Eukaryotic translation initiation factor 3 subunit I OS=Arabidopsis thaliana GN=TIF3I1 PE=2 SV=2	At3g15610	583	0	KOG0278	Serine/threonine kinase receptor-associated protein	I	Lipid transport and metabolism	K13137|1|0.0|630|pop:7478372|serine-threonine kinase receptor-associated protein		GO:0016301//kinase activity	-
6993	PSS28983.1	SH3 domain-containing protein [Actinidia chinensis var. chinensis]	39255.2	0.152	2	2	-	0.83	0.996|0.653|1.036|1.032|0.693|1.063|0.724|0.493|0.748	0.208	9	0.03799	PSS28983.1	MDVLRRQASKLREQVAKQQQAVIKQLSGSGYERSDVMVIDEVEMQRHQQLEKLYRSTRSGRDFQKDIIKAAETFTAIGYKHIETGTKLSEDCFKYGVDNIDDKILAKAASLYGDACKHMEKEQEDLNRQLFSQIIEPLRAMATGSPLEDARHLAQRYSRMRQEAEIQAAEVSRRQARVREAPIPENVAKLHAAESKMQELKANMAVLGKEAAAALAVVESQQQRLTFQRLVALVEGEKTFHERLAAILGEVEAEIVSEKQRKESAPPVIPSMNRSEKIKYFLAEAVHAFDAASEKELSLAVGDYVVVRKVSSSGWSEGECRGKAGWFPSACVEKRLRIPTSSESAEVF	81.897	0	CDP19824.1	unnamed protein product [Coffea canephora]	74.07	0	sp|Q8L7W0|SH3P3_ARATH	SH3 domain-containing protein 3 OS=Arabidopsis thaliana GN=SH3P3 PE=1 SV=1	CE23342	52.8	4e-07	KOG1029	Endocytic adaptor protein intersectin	TU	Signal transduction mechanisms;Intracellular trafficking, secretion, and vesicular transport	K11247|1|1e-121|358|ppp:112293770|endophilin-A	-	-	-
7021	PSS19559.1	DNA oxidative demethylase [Actinidia chinensis var. chinensis]	32201.5	0.04	1	1	PSS17401.1	0.71	0.877|0.677|0.722|0.804|0.673|0.664|0.748|0.583|0.621	0.091	9	3.186e-05	PSS19559.1	MERSTPVRKPHTSTADLLTWSENPPADSPARSAPRSHQPSDGIRKVVFGGQVTDEEVESLNKRKPCSGYKLKEITGSGIFAGDEENGTLESDANPTPGSKTGLRMYQQAVAGISHISFGDEGAVSPKKPATLPEVAKQRELSGTLESESEAKLKKQLSDAKSKELSGHNIFAPPPEIQPRPLAARALALRESIEIGEPAPINVRTSVKVSKPAGGQSSDMFNEELVIKTSKKIPNQKFAELTGNDIFKGDDHPTSAERSLSSAKLREISGNDIFADGKVESRDYFGGVRKPPGGSSSIALV	81.457	1e-169	XP_018850982.1	PREDICTED: uncharacterized protein LOC109013374 [Juglans regia]	50	1e-07	sp|Q9SIE0|ALKB2_ARATH	DNA oxidative demethylase ALKBH2 OS=Arabidopsis thaliana GN=ALKBH2 PE=2 SV=2	-	-	-	-	-	-	-	K21596|1|3e-31|125|bna:106368668|calmodulin-binding transcription activator	-	-	-
7033	PSR95709.1	Apoptosis inhibitor 5-like protein [Actinidia chinensis var. chinensis]	39940.1	0.149	1	1	-	0.77	0.870|0.709|0.837|0.855|0.708|0.804|0.784|0.624|0.735	0.082	9	7.952e-05	PSR95709.1	MTLLRQDIKTSLTVLFKYIGNPDEPSIEESIREKVLCFIRDKVFPLKAELLKPQEQMERHITDLVKKSLQDVTGAEFKMFIDFLRSLSLFGQNAPVERIQELVEIIEGQADLDAQFNVSDGDHIDRLISCLHMALPFFMRGASSNRFLNYLNKHILPVFDKLPEERKVDLLKNLAECSSYVTPQDSRQLLPSIVQLLKRLRTIDDLSKAMVKKLTQGMAEQNKLMAAAKTDEERDIIKRQKLNSTIGTRTCNNILAMISPLHSRSPSFIGDQKIKLSWKEAMKPPVPATAPAAGTKRAATAANDSSTNAVKKGRGTGGVQNQLVNRALEGLYHGGRTSGRGRGWGGRGRRGRGFR	60.553	5e-158	XP_002272702.2	PREDICTED: apoptosis inhibitor 5-like protein API5 isoform X1 [Vitis vinifera]	48.86	1e-116	sp|Q6Z6S1|API5_ORYSJ	Apoptosis inhibitor 5-like protein API5 OS=Oryza sativa subsp. japonica GN=API5 PE=1 SV=1	At2g34040	308	2e-101	KOG2213	Apoptosis inhibitor 5/fibroblast growth factor 2-interacting factor 2, and related proteins	T	Signal transduction mechanisms	K12391|1|2e-19|94.4|csat:104756754|AP-1 complex subunit gamma-1		GO:0005319//lipid transporter activity	-
7107	PSS14601.1	TP53-regulating kinase [Actinidia chinensis var. chinensis]	25226.3	0.146	1	1	-	0.82	0.889|0.846|0.781|0.863|0.822|0.738|0.878|0.811|0.747	0.055	9	2.058e-05	PSS14601.1	MAIMADEKSGSLILVKQGAEARVFESTFVGKRSIVKERFSKKYRHPSLDAKITLRRLNAEARCVTKARRLGVCTPVLFAVDPVLHTLTFEHVEGPSVKDIFLDFGSNGVIEERMDDIAAQIGDAIGKLHDGGLIHGDLTTSNMLIRNNTNQLVLIDFGLSFTSTLPEDKAVDLYVLERALLSMHSSCGNVMDRLLAAYRKSSKQWSSTLNKLAQVRQRGRKRTMVG	87.168	1e-149	XP_018856220.1	PREDICTED: EKC/KEOPS complex subunit bud32 [Juglans regia]	-	-	-	-	At5g26110	373	1e-131	KOG3087	Serine/threonine protein kinase	R	General function prediction only	K08851|1|2e-150|421|jre:109018511|TP53 regulating kinase and related kinases [EC:2.7.11.1]	GO:0070525//tRNA threonylcarbamoyladenosine metabolic process	GO:0004674//protein serine/threonine kinase activity;GO:0005524//ATP binding	GO:0000408//EKC/KEOPS complex;GO:0005634//nucleus;GO:0005829//cytosol
7130	PSS01374.1	Purple acid phosphatase [Actinidia chinensis var. chinensis]	50425.5	0.115	4	4	-	0.77	0.664|0.902|0.671|0.750|0.919|0.744|0.680|0.910|0.671	0.111	9	0.0004087	PSS01374.1	MEKYWFSCFCFFLQVLTLQSHASPEYTRQPPRPIIFTHHKGSDSDPQQVHISLVGKDHMRVSWVTSDHHTRSKVEYGKAPGRYESSATGEHTKYQYFFYSSGKIHHVKIGPLEPATTYYYRCGGSGPEFSLRTPPSALPIEFAVAGDLGQTEWTESTLAHIGARDYDVFLLPGDLSYADTQQILWDSFGRLVEPYASRRPWMVTEGNHEIETFPIIYPEGFKAYNARWLMPYEESGSQSNLYYSFDVAGTHIIMLGSYADFGASSKQYKWLEADLAKVNRSETPWLFVLLHAPWYNSNAAHKGEGESMRKSMEEMLYKARVDVVFSGHVHAYERFTRVYGNKADPCGPVYVTIGDGGNREGLALLFEKPSPSISVYREPSFGHGRLRILNNTHAHWSWH…	76.832	0	XP_016436922.1	PREDICTED: purple acid phosphatase 22-like [Nicotiana tabacum]	72.34	0	sp|Q8S340|PPA22_ARATH	Purple acid phosphatase 22 OS=Arabidopsis thaliana GN=PAP22 PE=2 SV=1	At3g52820	607	0	KOG1378	Purple acid phosphatase	G	Carbohydrate transport and metabolism	K22390|1|0.0|702|nta:107763028|acid phosphatase type 7		GO:0046872//metal ion binding;GO:0003993//acid phosphatase activity	-
7131	PSS14498.1	Pheophytinase [Actinidia chinensis var. chinensis]	43075	0.024	1	1	-	0.8	0.934|0.908|0.855|0.837|0.820|0.753|0.736|0.700|0.658	0.094	9	0.000416	PSS14498.1	MASTSSSMFALSKVEFPAVYPHRTRKKPSRPIPFGPSNPSTNFLLPRIIPRLSLSNSDGYGIRSRLDANVVEDPTKDKSPSLEVKTRVWSWRGYSIRYQYSGNSGPALVLVHGFGANSGHWRKNIPVLACSHRVFSIDLIGYGYSDKPNPRDFGVNSFYTFETWATQLNEFCVDVVKDKAFFICNSIGGVVGLQAAVMEPEICRGIVILNISLRMLHIKKQPWYVRPLIRSLQSLLRNTALGKFFYRSVATPESVKSILCQCYHDTSQVTDDLVETILLPGLEPGAVDVFLEFVCYSGGPLPEELLPQVKCPVLVAWGDKDPWEPIELGRAYEKFDSVEDFIVLPNVGHCPQDEAPHLVNPLVESFVARHVTSQASLSAEVM	73.177	0	XP_010651378.1	PREDICTED: pheophytinase, chloroplastic isoform X1 [Vitis vinifera]	24.26	5e-22	sp|Q9FFZ1|PPH_ARATH	Pheophytinase, chloroplastic OS=Arabidopsis thaliana GN=PPH PE=1 SV=1	At5g19850_2	496	1e-177	KOG1454	Predicted hydrolase/acyltransferase (alpha/beta hydrolase superfamily)	R	General function prediction only	K13699|1|6e-09|62.0|mus:103998853|abhydrolase domain-containing protein 5 [EC:2.3.1.51]!K14759|2|2e-08|61.6|gab:108465126|isochorismate synthase / 2-succinyl-5-enolpyruvyl-6-hydroxy-3-cyclohexene-1-carboxylate synthase / 2-succinyl-6-hydroxy-2,4-cyclohexadiene-1-carboxylate synthase / O-succinylbenzoate synthase [EC:5.4.4.2 2.2.1.9 4.2.99.20 4.2.1.113]		GO:0016787//hydrolase activity	-
7164	PSS09710.1	GPI-anchored adhesin-like protein precursor [Actinidia chinensis var. chinensis]	217102	0.034	3	3	-	0.8	0.773|0.822|0.796|0.700|0.769|0.714|0.859|0.917|0.889	0.075	9	9.671e-05	PSS09710.1	MDYDENDFQGQNLQLAGEESSKFSPVLHPYALPKFDFDDGLQGHLRFDSLVENEVFLGIPSQEDNQWIEDFSRGSSGIEFRSSAAESCSIARRNNVWSEATSSESVEMLLKSVRQEEMVPGETIIEESDACDELRNLTEQMEHHLKQDDKAKDVMDSEPALPSDERTEHFSNLNDVEGTSKTQEVEKSIHGSSYELDPNVSSGTRGVIVTESMPGVDRECDDVNQTEARISVNESHDNKMQNDSFGSGMQIDDMNSSSKEASVQVLDTTQPEHQLSDNSFENANCLRMDTGKAPAEHQVFSKEADVDDKTLKGIAAKTDTHNLENLPRSYSEAESTEQHAVESGISNFAEPSSLVLKGAGDPQIAETCSEDLRSRDIEKASKCEPVDLANSIEVPQQFR…	44.805	0	XP_002267137.2	PREDICTED: uncharacterized protein LOC100266068 isoform X2 [Vitis vinifera]	-	-	-	-	At4g17330_1	201	4e-52	KOG1181	FOG: Low-complexity	S	Function unknown	-	-	-	-
7180	PSS28698.1	hypothetical protein CEY00_Acc06296 [Actinidia chinensis var. chinensis]	49784.9	0.104	1	2	-	0.79	0.600|0.616|0.758|0.733|0.762|0.907|0.850|0.858|1.061	0.144	9	0.003652	PSS28698.1	MAATAASDLTEGPVLNLITKRLRALRKKHNRIVQMEESVSQGKPLNKEQEEVLRTKPSVTAAIDELEKLRQPLAAAVADEISLAVQNHQVSGPPSLNAATASDSEQTVADTESKEDREYSIVEDLLNLLYFGTMFDVKSQNDFTSTMLTRTHERGCCLTYDYVTDDENADLLCETDLDLISMLGSLLISRPVDSSFSHRDALQRCIVHAKQWLVNSDQPINSDLSVTYAGLKAKLNKIMASDYFTTTPEMKATVEMAAAAVGNYAAFQVPVHGSMVPVSVPVLVEGSDEQYQQKDEDATNFEGNEAYDNQSSPVEEPHKGEFESENTTEIPSQTELDEQQTEGQNQRDVESKDNHYAPRRNFQNQRGGRGGEGGRRGYPNGRVGRGSSRGGGGYQNGRN…	61.013	2e-162	XP_021685395.1	uncharacterized protein LOC110668467 [Hevea brasiliensis]	-	-	-	-	-	-	-	-	-	-	-	K18743|1|3e-145|428|pavi:110772868|caprin-1!K10357|2|7e-07|56.6|mtr:MTR_1g037490|myosin V	-	-	-
[truncated: 1,269 more rows]
