# Supplementary material for: Transcriptomic and Proteomic Profiling Reveal the Key Role of AcMYB16 in the Response of Pseudomonas syringae pv. actinidiae in Kiwifruit
Source: Front Plant Sci. 2021 Nov 11;12:756330. doi: 10.3389/fpls.2021.756330 (PMC8632638; doi:10.3389/fpls.2021.756330)
Supplement: Supplementary file 5 [file Table_4.XLS]

Table S4 Pathways of differential accumulation of proteins and differential expression of related transcripts in A. c. var. deliciosa cultivar ¡®Jinkui¡¯ after Psa inoculation.
Pathway	Protein_num	Gene_num	Protein_pvalue	Gene_pvalue	Cor_mapID	Protein_Enrichment_factor	Gene_Enrichment_factor
Plant-pathogen interaction	28	322	0.4068375	3.25E-27		0.217054264	0.307251908
ABC transporters	10	88	0.5091089	1.39E-06		0.212765957	0.28115016
Phenylpropanoid biosynthesis	49	149	0.000509989	6.58E-06		0.320261438	0.243066884
Plant hormone signal transduction	34	263	0.00039102	2.71E-05		0.357894737	0.218257261
alpha-Linolenic acid metabolism	10	38	0.6732965	0.001873688		0.188679245	0.275362319
Starch and sucrose metabolism	35	152	0.7845233	0.002433988		0.185185185	0.214689266
Phosphatidylinositol signaling system	10	69	0.5384567	0.003083576		0.208333333	0.237931034
Flavonoid biosynthesis	16	53	0.171941	0.004081968		0.262295082	0.246511628
Galactose metabolism	12	75	0.8027216	0.004434184		0.171428571	0.231481481
Diterpenoid biosynthesis	6	36	0.04929206	5.81E-02		0.428571429	0.264705882
Zeatin biosynthesis	1	18	0.800437	0.00920883		0.142857143	0.305084746
Stilbenoid, diarylheptanoid and gingerol biosynthesis	6	22	0.2512068	0.01158064		0.285714286	0.282051282
Ascorbate and aldarate metabolism	6	54	0.9950998	0.01250014		0.09375	0.232758621
Cutin, suberine and wax biosynthesis	4	21	0.2202769	0.019613		0.333333333	0.272727273
Nitrogen metabolism	8	27	0.263973	0.02212868		0.266666667	0.254716981
Biosynthesis of secondary metabolites	218	644	0.9801278	0.02307937		0.184121622	0.18575137
Cyanoamino acid metabolism	14	56	0.5936677	0.02891803		0.2	0.221343874
Limonene and pinene degradation	3	10	0.5188226	0.03182465		0.230769231	0.322580645
Carotenoid biosynthesis	11	31	0.4841569	0.03278284		0.215686275	0.240310078
Tryptophan metabolism	13	42	0.4134618	0.03943721		0.224137931	0.225806452
RNA polymerase	14	55	0.0116239	0.5308494		0.378378378	0.172955975
