# Supplementary material for: Transcriptomic and Proteomic Profiling Reveal the Key Role of AcMYB16 in the Response of Pseudomonas syringae pv. actinidiae in Kiwifruit
Source: Frontiers journal article supplement (doi:10.3389/fpls.2021.756330), 2021-11-11
Supplement: Table_1.XLS [file Table_1.XLS]

## Sheet: Sheet1
Table S1 Sequences of primers used in qRT-PCR analysis.
gene	note	Primer-f	Primer-r
Acc29799	U-box domain-containing protein	CTCCGAGCTCCACCTCGCTT	AGGGGTCGCAATCGTCCGAA
Acc04990	Vacuolar iron transporter like	AGCCCTGGCGTTTTCGGTTG	CTAACGCCGCCCCCAAACAC
Acc25303	Hippocampus abundant transcript-like protein	GTGGCGGAGGAGATGACCGT	CCGTCTGCTGAAGGCCGTTG
Acc22713	Peroxisome biogenesis protein	ATGGGGACGGCTGCTTCTGA	CCGAACCCGGAGGTCCACATA
Acc19042	Myb-related protein like	TGGCCATTGGAACTGGCGTG	GCCCCGTTTCACATTTGGGCA
Acc09737	F-box protein	TGGCCATTTCCGGCCCACTA	GCACGACTGCCAACGAACCA
Acc31132	Vacuolar fusion protein	CCGCTGTACGGTCTCGTCTCT	ACAGAACCAGTGGCAGCATGAG
Acc12516	NADP-dependent malic enzyme like	TCTCGCGCTCTCCAACCCAA	TCAACGGGGTCGAATGGGCT
Acc07880	Myosin-binding protein 4	AATGCTTGCAGATGGAGCCTCG	AAGTGGGAGCTCAGGTGCAGA
Acc11522	Chlorophyll A-B binding protein	ATCGGAGCATTGGGCGATAG	CCAGAGCTCCTTTCCCTGTG
Acc22191	3-isopropylmalate dehydrogenase	CACCGGCTCTGTCGAAGGGA	TCCGGCAATGGAACTCCGGT
Acc11116	Beta-galactosidase	GACCGGGCAACGCACAATGA	CCGGCGACCAGCTATCGTCT
GADPH	GADPH	ACACTCCATCACTGCGACA	CACCTTGCCAACAGCCTTA
														10.7	11
														8	13
